# Supplementary material
Source: Royal Society of Chemistry journal article supplement (doi:10.1039/d5ew00860c)
Supplement: d5ew00860c2.xlsx [file d5ew00860c2.xlsx]

## Sheet: Read me
Supplementary Table 2 provides the CSS-WB combination data used in the Source–Pathway–Receptor risk framework. Hazard components include two ratios: (H1) the share of a CSS’s aggregated CSO loads relative to the combined CSO and WWTW load per waterbody, and (H2) the ratio of a CSS’s aggregated CSO loads to its WWTW effluent load. Both are calculated per determinand and mapped to five hazard class…

## Sheet: Supplementary_Table_3_CSS_Loads
PERMIT_NUMBER_WWTWs	WB_ID	BOD_Ratio_CSSCSOs_perWB	Cadmium_Ratio_CSSCSOs_perWB	Chromium_Ratio_CSSCSOs_perWB	Copper_Ratio_CSSCSOs_perWB	Lead_Ratio_CSSCSOs_perWB	Mercury_Ratio_CSSCSOs_perWB	Nickel_Ratio_CSSCSOs_perWB	Nitrogen_Ratio_CSSCSOs_perWB	Solids_Ratio_CSSCSOs_perWB	Total Phosphorus_Ratio_CSSCSOs_perWB	Zinc_Ratio_CSSCSOs_perWB	BOD_Ratio_CSSCSOs_perWB_Class	Cadmium_Ratio_CSSCSOs_perWB_Class	Chromium_Ratio_CSSCSOs_perWB_Class	Copper_Ratio_CSSCSOs_perWB_Class	Lead_Ratio_CSSCSOs_perWB_Class	Mercury_Ratio_CSSCSOs_perWB_Class	Nickel_Ratio_CSSCSOs_perWB_Class	Nitrogen_Ratio_CSSCSOs_perWB_Class	Solids_Ratio_CSSCSOs_perWB_Class	Total Phosphorus_Ratio_CSSCSOs_perWB_Class	Zinc_Ratio_CSSCSOs_perWB_Class	Overall_Ratio_CSSCSOsperWB	BOD_RatioCSOofCSStoWWTWInputs	Cadmium_RatioCSOofCSStoWWTWInputs	Chromium_RatioCSOofCSStoWWTWInputs	Copper_RatioCSOofCSStoWWTWInputs	Lead_RatioCSOofCSStoWWTWInputs	Mercury_RatioCSOofCSStoWWTWInputs	Nickel_RatioCSOofCSStoWWTWInputs	Nitrogen_RatioCSOofCSStoWWTWInputs	Solids_RatioCSOofCSStoWWTWInputs	Total Phosphorus_RatioCSOofCSStoWWTWInputs	Zinc_RatioCSOofCSStoWWTWInputs	BOD_RatioCSOofCSStoWWTWInputs_Class	Cadmium_RatioCSOofCSStoWWTWInputs_Class	Chromium_RatioCSOofCSStoWWTWInputs_Class	Copper_RatioCSOofCSStoWWTWInputs_Class	Lead_RatioCSOofCSStoWWTWInputs_Class	Mercury_RatioCSOofCSStoWWTWInputs_Class	Nickel_RatioCSOofCSStoWWTWInputs_Class	Nitrogen_RatioCSOofCSStoWWTWInputs_Class	Solids_RatioCSOofCSStoWWTWInputs_Class	Total Phosphorus_RatioCSOofCSStoWWTWInputs_Class	Zinc_RatioCSOofCSStoWWTWInputs_Class	Overall_RatioCSOofCSStoWWTWInputs_Class	Hazard	Bathing Water Directive
001685/FU/01	GB520804609000	0.209201	0	0	0	0	0	0	0	0.150791	0	0	Low	Very Low	Very Low	Very Low	Very Low	Very Low	Very Low	Very Low	Very Low	Very Low	Very Low	Low	0.457036	0	0	0	0	0	0	0	0.399907	0	0	Moderate	Very Low	Very Low	Very Low	Very Low	Very Low	Very Low	Very Low	Low	Very Low	Very Low	Moderate	Moderate	0
001685/FU/01	GB620806110002	0.0190848	0	0	0	0	0	0	0	0.00848108	0	0	Very Low	Very Low	Very Low	Very Low	Very Low	Very Low	Very Low	Very Low	Very Low	Very Low	Very Low	Very Low	0.457036	0	0	0	0	0	0	0	0.399907	0	0	Moderate	Very Low	Very Low	Very Low	Very Low	Very Low	Very Low	Very Low	Low	Very Low	Very Low	Moderate	Moderate	3
001685/FU/01	GB680806460000	0	0	0	0	0	0	0	0	0	0	0	Very Low	Very Low	Very Low	Very Low	Very Low	Very Low	Very Low	Very Low	Very Low	Very Low	Very Low	Very Low	0.457036	0	0	0	0	0	0	0	0.399907	0	0	Moderate	Very Low	Very Low	Very Low	Very Low	Very Low	Very Low	Very Low	Low	Very Low	Very Low	Moderate	Moderate	3
2027	GB108047008040	0.365289	0	0	0	0	0	0	0.0969056	0.301525	0	0	Low	Very Low	Very Low	Very Low	Very Low	Very Low	Very Low	Very Low	Low	Very Low	Very Low	Low	1.62395	0	0	0	0	0	0	0.151568	1.42095	0	0	Very High	Very Low	Very Low	Very Low	Very Low	Very Low	Very Low	Very Low	Very High	Very Low	Very Low	Very High	Very High	0
2491	GB108050014620	1	0	0	0	0	0	0	1	1	0	0	Very High	Very Low	Very Low	Very Low	Very Low	Very Low	Very Low	Very High	Very High	Very Low	Very Low	Very High	0.457454	0	0	0	0	0	0	0.160109	0.400272	0	0	Moderate	Very Low	Very Low	Very Low	Very Low	Very Low	Very Low	Very Low	Moderate	Very Low	Very Low	Moderate	Very High	0
2491	GB108050019980	0.724173	0	0	0	0	0	0	0.38024	0.652776	0	0	High	Very Low	Very Low	Very Low	Very Low	Very Low	Very Low	Low	High	Very Low	Very Low	High	0.457454	0	0	0	0	0	0	0.160109	0.400272	0	0	Moderate	Very Low	Very Low	Very Low	Very Low	Very Low	Very Low	Very Low	Moderate	Very Low	Very Low	Moderate	High	0
2491	GB108050020000	1	0	0	0	0	0	0	1	1	0	0	Very High	Very Low	Very Low	Very Low	Very Low	Very Low	Very Low	Very High	Very High	Very Low	Very Low	Very High	0.457454	0	0	0	0	0	0	0.160109	0.400272	0	0	Moderate	Very Low	Very Low	Very Low	Very Low	Very Low	Very Low	Very Low	Moderate	Very Low	Very Low	Moderate	Very High	0
2491	GB108050020010	0.213769	0	0	0	0	0	0	0.220813	0.199479	0	0	Low	Very Low	Very Low	Very Low	Very Low	Very Low	Very Low	Low	Very Low	Very Low	Very Low	Low	0.457454	0	0	0	0	0	0	0.160109	0.400272	0	0	Moderate	Very Low	Very Low	Very Low	Very Low	Very Low	Very Low	Very Low	Moderate	Very Low	Very Low	Moderate	Moderate	0
2491	GB108050020020	0.0217006	0	0	0	0	0	0	0.0565827	0.0174315	0	0	Very Low	Very Low	Very Low	Very Low	Very Low	Very Low	Very Low	Very Low	Very Low	Very Low	Very Low	Very Low	0.457454	0	0	0	0	0	0	0.160109	0.400272	0	0	Moderate	Very Low	Very Low	Very Low	Very Low	Very Low	Very Low	Very Low	Moderate	Very Low	Very Low	Moderate	Moderate	0
2491	GB540805015500	0.123948	0	0	0	0	0	0	0.0663308	0.114003	0	0	Very Low	Very Low	Very Low	Very Low	Very Low	Very Low	Very Low	Very Low	Very Low	Very Low	Very Low	Very Low	0.457454	0	0	0	0	0	0	0.160109	0.400272	0	0	Moderate	Very Low	Very Low	Very Low	Very Low	Very Low	Very Low	Very Low	Moderate	Very Low	Very Low	Moderate	Moderate	1
002671/FU/01	GB610807680004	0.188321	0	0	0	0	0	0	0	0.17394	0	0	Very Low	Very Low	Very Low	Very Low	Very Low	Very Low	Very Low	Very Low	Very Low	Very Low	Very Low	Very Low	0.362454	0	0	0	0	0	0	0	0.317148	0	0	Low	Very Low	Very Low	Very Low	Very Low	Very Low	Very Low	Very Low	Low	Very Low	Very Low	Low	Low	6
2673	GB108051020440	1	0	0	0	0	0	0	0	1	0	0	Very High	Very Low	Very Low	Very Low	Very Low	Very Low	Very Low	Very Low	Very High	Very Low	Very Low	Very High	1.12569	0	0	0	0	0	0	0	0.984977	0	0	Very High	Very Low	Very Low	Very Low	Very Low	Very Low	Very Low	Very Low	Very High	Very Low	Very Low	Very High	Very High	0
002728/FN/01	GB108045015120	0.0319243	0	0	0	0	0	0	0.00306842	0.0280457	0	0	Very Low	Very Low	Very Low	Very Low	Very Low	Very Low	Very Low	Very Low	Very Low	Very Low	Very Low	Very Low	0.0329771	0	0	0	0	0	0	0.00307786	0.028855	0	0	Very Low	Very Low	Very Low	Very Low	Very Low	Very Low	Very Low	Very Low	Very Low	Very Low	Very Low	Very Low	Very Low	0
003101/FN/01	GB108045008630	0.0782377	0	0	0	0	0	0	0.00785972	0.0691341	0	0	Very Low	Very Low	Very Low	Very Low	Very Low	Very Low	Very Low	Very Low	Very Low	Very Low	Very Low	Very Low	0.0848784	0	0	0	0	0	0	0.00792198	0.0742686	0	0	Very Low	Very Low	Very Low	Very Low	Very Low	Very Low	Very Low	Very Low	Very Low	Very Low	Very Low	Very Low	Very Low	0
003126/FN/01	GB108050008290	0.573676	0	0	0	0	0	0	0.363412	0.540743	0	0	Moderate	Very Low	Very Low	Very Low	Very Low	Very Low	Very Low	Low	Moderate	Very Low	Very Low	Moderate	1.34563	0	0	0	0	0	0	0.570875	1.17743	0	0	Very High	Very Low	Very Low	Very Low	Very Low	Very Low	Very Low	Moderate	Very High	Very Low	Very Low	Very High	Very High	0
003174/FU/02	GB510804505500	0.589374	0	0	0	0	0	0	0	0.18676	0	0	Moderate	Very Low	Very Low	Very Low	Very Low	Very Low	Very Low	Very Low	Very Low	Very Low	Very Low	Moderate	1.66398	0	0	0	0	0	0	0	1.45598	0	0	Very High	Very Low	Very Low	Very Low	Very Low	Very Low	Very Low	Very Low	Very High	Very Low	Very Low	Very High	Very High	0
003174/FU/02	GB510804505600	0.678016	0	0	0	0	0	0	0	0.263561	0	0	High	Very Low	Very Low	Very Low	Very Low	Very Low	Very Low	Very Low	Low	Very Low	Very Low	High	1.66398	0	0	0	0	0	0	0	1.45598	0	0	Very High	Very Low	Very Low	Very Low	Very Low	Very Low	Very Low	Very Low	Very High	Very Low	Very Low	Very High	Very High	2
003174/FU/02	GB650806420000	0.157889	0	0	0	0	0	0	0	0.0996807	0	0	Very Low	Very Low	Very Low	Very Low	Very Low	Very Low	Very Low	Very Low	Very Low	Very Low	Very Low	Very Low	1.66398	0	0	0	0	0	0	0	1.45598	0	0	Very High	Very Low	Very Low	Very Low	Very Low	Very Low	Very Low	Very Low	Very High	Very Low	Very Low	Very High	Very High	17
3269	GB108044009760	0.422539	0	0	0	0	0	0	0	0.390339	0	0	Moderate	Very Low	Very Low	Very Low	Very Low	Very Low	Very Low	Very Low	Low	Very Low	Very Low	Moderate	0.748975	0	0	0	0	0	0	0	0.655354	0	0	High	Very Low	Very Low	Very Low	Very Low	Very Low	Very Low	Very Low	High	Very Low	Very Low	High	High	0
3269	GB620806560000	0.000430392	0	0	0	0	0	0	0	0.000610626	0	0	Very Low	Very Low	Very Low	Very Low	Very Low	Very Low	Very Low	Very Low	Very Low	Very Low	Very Low	Very Low	0.748975	0	0	0	0	0	0	0	0.655354	0	0	High	Very Low	Very Low	Very Low	Very Low	Very Low	Very Low	Very Low	High	Very Low	Very Low	High	High	8
10001	GB109054026650	0.0244348	0	0	0	0	0	0	0.010799	0.0266557	0	0	Very Low	Very Low	Very Low	Very Low	Very Low	Very Low	Very Low	Very Low	Very Low	Very Low	Very Low	Very Low	0.42352	0	0	0	0	0	0	0.0395285	0.37058	0	0	Moderate	Very Low	Very Low	Very Low	Very Low	Very Low	Very Low	Very Low	Low	Very Low	Very Low	Moderate	Moderate	0
10002	GB109054026650	0.0458906	0	0	0	0	0	0	0.0173841	0.08582	0	0	Very Low	Very Low	Very Low	Very Low	Very Low	Very Low	Very Low	Very Low	Very Low	Very Low	Very Low	Very Low	1.24053	0	0	0	0	0	0	0.115783	1.08547	0	0	Very High	Very Low	Very Low	Very Low	Very Low	Very Low	Very Low	Very Low	Very High	Very Low	Very Low	Very High	Very High	0
10024	GB109053021950	0.0194746	0	0	0	0	0	0	0.0183625	0.103749	0	0	Very Low	Very Low	Very Low	Very Low	Very Low	Very Low	Very Low	Very Low	Very Low	Very Low	Very Low	Very Low	1.61583	0	0	0	0	0	0	0.150811	1.41385	0	0	Very High	Very Low	Very Low	Very Low	Very Low	Very Low	Very Low	Very Low	Very High	Very Low	Very Low	Very High	Very High	0
10029	GB109053027590	1	0	0	0	0	0	0	1	1	0	0	Very High	Very Low	Very Low	Very Low	Very Low	Very Low	Very Low	Very High	Very High	Very Low	Very Low	Very High	16.5465	0	0	0	0	0	0	0.230648	4.75712	0	0	Very High	Very Low	Very Low	Very Low	Very Low	Very Low	Very Low	Low	Very High	Very Low	Very Low	Very High	Very High	0
10029	GB109054026590	0.768327	0	0	0	0	0	0	0.0441862	0.488091	0	0	High	Very Low	Very Low	Very Low	Very Low	Very Low	Very Low	Very Low	Moderate	Very Low	Very Low	High	16.5465	0	0	0	0	0	0	0.230648	4.75712	0	0	Very High	Very Low	Very Low	Very Low	Very Low	Very Low	Very Low	Low	Very High	Very Low	Very Low	Very High	Very High	0
10031	GB109053027690	0.208439	0	0	0	0	0	0	0.0516733	0.191642	0	0	Low	Very Low	Very Low	Very Low	Very Low	Very Low	Very Low	Very Low	Very Low	Very Low	Very Low	Low	1.65355	0	0	0	0	0	0	0.154331	1.44685	0	0	Very High	Very Low	Very Low	Very Low	Very Low	Very Low	Very Low	Very Low	Very High	Very Low	Very Low	Very High	Very High	0
10032	GB109053021760	0.345966	0	0	0	0	0	0	0.047048	0.316404	0	0	Low	Very Low	Very Low	Very Low	Very Low	Very Low	Very Low	Very Low	Low	Very Low	Very Low	Low	0.528973	0	0	0	0	0	0	0.0493708	0.462852	0	0	Moderate	Very Low	Very Low	Very Low	Very Low	Very Low	Very Low	Very Low	Moderate	Very Low	Very Low	Moderate	Moderate	0
10034	GB109053022020	0.154907	0	0	0	0	0	0	0.0249594	0.170372	0	0	Very Low	Very Low	Very Low	Very Low	Very Low	Very Low	Very Low	Very Low	Very Low	Very Low	Very Low	Very Low	0.883345	0	0	0	0	0	0	0.0824455	0.772927	0	0	Very High	Very Low	Very Low	Very Low	Very Low	Very Low	Very Low	Very Low	High	Very Low	Very Low	Very High	Very High	0
10037	GB109053021840	0.0480042	0	0	0	0	0	0	0.00753695	0.0411127	0	0	Very Low	Very Low	Very Low	Very Low	Very Low	Very Low	Very Low	Very Low	Very Low	Very Low	Very Low	Very Low	0.701998	0	0	0	0	0	0	0.0655198	0.614249	0	0	High	Very Low	Very Low	Very Low	Very Low	Very Low	Very Low	Very Low	High	Very Low	Very Low	High	High	0
10037	GB109053027372	0.00661885	0	0	0	0	0	0	0.00670665	0.0247169	0	0	Very Low	Very Low	Very Low	Very Low	Very Low	Very Low	Very Low	Very Low	Very Low	Very Low	Very Low	Very Low	0.701998	0	0	0	0	0	0	0.0655198	0.614249	0	0	High	Very Low	Very Low	Very Low	Very Low	Very Low	Very Low	Very Low	High	Very Low	Very Low	High	High	0
10039	GB109053027665	0.693622	0	0	0	0	0	0	0.190685	0.668297	0	0	High	Very Low	Very Low	Very Low	Very Low	Very Low	Very Low	Very Low	High	Very Low	Very Low	High	3.76578	0	0	0	0	0	0	0.351472	3.29505	0	0	Very High	Very Low	Very Low	Very Low	Very Low	Very Low	Very Low	Low	Very High	Very Low	Very Low	Very High	Very High	0
10047	GB109053021770	0.00160005	0	0	0	0	0	0	0.00227447	0.00334957	0	0	Very Low	Very Low	Very Low	Very Low	Very Low	Very Low	Very Low	Very Low	Very Low	Very Low	Very Low	Very Low	0.357696	0	0	0	0	0	0	0.0333849	0.312984	0	0	Low	Very Low	Very Low	Very Low	Very Low	Very Low	Very Low	Very Low	Low	Very Low	Very Low	Low	Low	0
10047	GB109053022140	0.324466	0	0	0	0	0	0	0.0493782	0.245181	0	0	Low	Very Low	Very Low	Very Low	Very Low	Very Low	Very Low	Very Low	Low	Very Low	Very Low	Low	0.357696	0	0	0	0	0	0	0.0333849	0.312984	0	0	Low	Very Low	Very Low	Very Low	Very Low	Very Low	Very Low	Very Low	Low	Very Low	Very Low	Low	Low	0
10047	GB109053022150	1	0	0	0	0	0	0	1	1	0	0	Very High	Very Low	Very Low	Very Low	Very Low	Very Low	Very Low	Very High	Very High	Very Low	Very Low	Very High	0.357696	0	0	0	0	0	0	0.0333849	0.312984	0	0	Low	Very Low	Very Low	Very Low	Very Low	Very Low	Very Low	Very Low	Low	Very Low	Very Low	Low	Very High	0
10047	GB109053022170	0.0864899	0	0	0	0	0	0	0.335077	0.30947	0	0	Very Low	Very Low	Very Low	Very Low	Very Low	Very Low	Very Low	Low	Low	Very Low	Very Low	Low	0.357696	0	0	0	0	0	0	0.0333849	0.312984	0	0	Low	Very Low	Very Low	Very Low	Very Low	Very Low	Very Low	Very Low	Low	Very Low	Very Low	Low	Low	0
10047	GB109053022200	0.0167198	0	0	0	0	0	0	0.00293603	0.0229638	0	0	Very Low	Very Low	Very Low	Very Low	Very Low	Very Low	Very Low	Very Low	Very Low	Very Low	Very Low	Very Low	0.357696	0	0	0	0	0	0	0.0333849	0.312984	0	0	Low	Very Low	Very Low	Very Low	Very Low	Very Low	Very Low	Very Low	Low	Very Low	Very Low	Low	Low	0
10053	GB109053022020	0.00698839	0	0	0	0	0	0	0.00168901	0.00672529	0	0	Very Low	Very Low	Very Low	Very Low	Very Low	Very Low	Very Low	Very Low	Very Low	Very Low	Very Low	Very Low	0.245898	0	0	0	0	0	0	0.0229505	0.215161	0	0	Low	Very Low	Very Low	Very Low	Very Low	Very Low	Very Low	Very Low	Low	Very Low	Very Low	Low	Low	0
10054	GB109053027480	0.515595	0	0	0	0	0	0	0.0903657	0.482225	0	0	Moderate	Very Low	Very Low	Very Low	Very Low	Very Low	Very Low	Very Low	Moderate	Very Low	Very Low	Moderate	1.06439	0	0	0	0	0	0	0.0993428	0.931339	0	0	Very High	Very Low	Very Low	Very Low	Very Low	Very Low	Very Low	Very Low	Very High	Very Low	Very Low	Very High	Very High	0
10059	GB109053022020	0.0130547	0	0	0	0	0	0	0.00210343	0.0125632	0	0	Very Low	Very Low	Very Low	Very Low	Very Low	Very Low	Very Low	Very Low	Very Low	Very Low	Very Low	Very Low	0.229415	0	0	0	0	0	0	0.021412	0.200738	0	0	Low	Very Low	Very Low	Very Low	Very Low	Very Low	Very Low	Very Low	Low	Very Low	Very Low	Low	Low	0
10063	GB109054026630	0.211362	0	0	0	0	0	0	0.0244037	0.189961	0	0	Low	Very Low	Very Low	Very Low	Very Low	Very Low	Very Low	Very Low	Very Low	Very Low	Very Low	Low	0.268009	0	0	0	0	0	0	0.0250142	0.234508	0	0	Low	Very Low	Very Low	Very Low	Very Low	Very Low	Very Low	Very Low	Low	Very Low	Very Low	Low	Low	0
10071	GB109053027510	0.00313774	0	0	0	0	0	0	0.0203596	0.00916381	0	0	Very Low	Very Low	Very Low	Very Low	Very Low	Very Low	Very Low	Very Low	Very Low	Very Low	Very Low	Very Low	0.8544	0	0	0	0	0	0	0.079744	0.7476	0	0	Very High	Very Low	Very Low	Very Low	Very Low	Very Low	Very Low	Very Low	High	Very Low	Very Low	Very High	Very High	0
10077	GB109054026630	0	0	0	0	0	0	0	0	0	0	0	Very Low	Very Low	Very Low	Very Low	Very Low	Very Low	Very Low	Very Low	Very Low	Very Low	Very Low	Very Low	0	0	0	0	0	0	0	0	0	0	0	Very Low	Very Low	Very Low	Very Low	Very Low	Very Low	Very Low	Very Low	Very Low	Very Low	Very Low	Very Low	Very Low	0
10080	GB109053022271	0.00926932	0	0	0	0	0	0	0.00790719	0.0328191	0	0	Very Low	Very Low	Very Low	Very Low	Very Low	Very Low	Very Low	Very Low	Very Low	Very Low	Very Low	Very Low	0.52396	0	0	0	0	0	0	0.0489029	0.458465	0	0	Moderate	Very Low	Very Low	Very Low	Very Low	Very Low	Very Low	Very Low	Moderate	Very Low	Very Low	Moderate	Moderate	0
10083	GB109053027650	0.386898	0	0	0	0	0	0	0.0778649	0.350695	0.068899	0	Low	Very Low	Very Low	Very Low	Very Low	Very Low	Very Low	Very Low	Low	Very Low	Very Low	Low	2.11749	0	0	0	0	0	0	0.197633	1.85281	0.151249	0	Very High	Very Low	Very Low	Very Low	Very Low	Very Low	Very Low	Very Low	Very High	Very Low	Very Low	Very High	Very High	0
10083	GB109053027700	1	0	0	0	0	0	0	1	1	1	0	Very High	Very Low	Very Low	Very Low	Very Low	Very Low	Very Low	Very High	Very High	Very High	Very Low	Very High	2.11749	0	0	0	0	0	0	0.197633	1.85281	0.151249	0	Very High	Very Low	Very Low	Very Low	Very Low	Very Low	Very Low	Very Low	Very High	Very Low	Very Low	Very High	Very High	0
10083	GB109053027710	1	0	0	0	0	0	0	1	1	1	0	Very High	Very Low	Very Low	Very Low	Very Low	Very Low	Very Low	Very High	Very High	Very High	Very Low	Very High	2.11749	0	0	0	0	0	0	0.197633	1.85281	0.151249	0	Very High	Very Low	Very Low	Very Low	Very Low	Very Low	Very Low	Very Low	Very High	Very Low	Very Low	Very High	Very High	0
10083	GB109053027720	1	0	0	0	0	0	0	1	1	1	0	Very High	Very Low	Very Low	Very Low	Very Low	Very Low	Very Low	Very High	Very High	Very High	Very Low	Very High	2.11749	0	0	0	0	0	0	0.197633	1.85281	0.151249	0	Very High	Very Low	Very Low	Very Low	Very Low	Very Low	Very Low	Very Low	Very High	Very Low	Very Low	Very High	Very High	0
10091	GB109053022000	0.0130612	0	0	0	0	0	0	0	0.0112596	0	0	Very Low	Very Low	Very Low	Very Low	Very Low	Very Low	Very Low	Very Low	Very Low	Very Low	Very Low	Very Low	0.114702	0	0	0	0	0	0	0	0.100364	0	0	Very Low	Very Low	Very Low	Very Low	Very Low	Very Low	Very Low	Very Low	Very Low	Very Low	Very Low	Very Low	Very Low	0
10092	GB109053022271	0.000820105	0	0	0	0	0	0	0.000559672	0.00199109	0	0	Very Low	Very Low	Very Low	Very Low	Very Low	Very Low	Very Low	Very Low	Very Low	Very Low	Very Low	Very Low	0.202074	0	0	0	0	0	0	0.0188602	0.176815	0	0	Low	Very Low	Very Low	Very Low	Very Low	Very Low	Very Low	Very Low	Very Low	Very Low	Very Low	Low	Low	0
10101	GB109054026610	0.179812	0	0	0	0	0	0	0.0200514	0.160953	0	0	Very Low	Very Low	Very Low	Very Low	Very Low	Very Low	Very Low	Very Low	Very Low	Very Low	Very Low	Very Low	0.219233	0	0	0	0	0	0	0.0204617	0.191829	0	0	Low	Very Low	Very Low	Very Low	Very Low	Very Low	Very Low	Very Low	Very Low	Very Low	Very Low	Low	Low	0
10156	GB109053027665	0.04111	0	0	0	0	0	0	0.0120551	0.039609	0	0	Very Low	Very Low	Very Low	Very Low	Very Low	Very Low	Very Low	Very Low	Very Low	Very Low	Very Low	Very Low	0.507052	0	0	0	0	0	0	0.0473248	0.44367	0	0	Moderate	Very Low	Very Low	Very Low	Very Low	Very Low	Very Low	Very Low	Moderate	Very Low	Very Low	Moderate	Moderate	0
10238	GB109053027640	0.00201904	0	0	0	0	0	0	0.00144467	0.00276017	0	0	Very Low	Very Low	Very Low	Very Low	Very Low	Very Low	Very Low	Very Low	Very Low	Very Low	Very Low	Very Low	0.372951	0	0	0	0	0	0	0.0348088	0.326332	0	0	Low	Very Low	Very Low	Very Low	Very Low	Very Low	Very Low	Very Low	Low	Very Low	Very Low	Low	Low	0
10265	GB109053022020	0.258662	0	0	0	0	0	0	0.0416769	0.213363	0	0	Low	Very Low	Very Low	Very Low	Very Low	Very Low	Very Low	Very Low	Low	Very Low	Very Low	Low	1.61211	0	0	0	0	0	0	0.150463	1.41059	0	0	Very High	Very Low	Very Low	Very Low	Very Low	Very Low	Very Low	Very Low	Very High	Very Low	Very Low	Very High	Very High	0
10299	GB109053022290	0.000665165	0	0	0	0	0	0	0.000152158	0.000523863	0	0	Very Low	Very Low	Very Low	Very Low	Very Low	Very Low	Very Low	Very Low	Very Low	Very Low	Very Low	Very Low	0.103236	0	0	0	0	0	0	0.00963534	0.0903313	0	0	Very Low	Very Low	Very Low	Very Low	Very Low	Very Low	Very Low	Very Low	Very Low	Very Low	Very Low	Very Low	Very Low	0
10304	GB109054026580	0.167214	0	0	0	0	0	0	0.0183955	0.149435	0	0	Very Low	Very Low	Very Low	Very Low	Very Low	Very Low	Very Low	Very Low	Very Low	Very Low	Very Low	Very Low	0.200788	0	0	0	0	0	0	0.0187402	0.175689	0	0	Low	Very Low	Very Low	Very Low	Very Low	Very Low	Very Low	Very Low	Very Low	Very Low	Very Low	Low	Low	0
10528	GB109053027380	0.394578	0	0	0	0	0	0	0.0645758	0.389065	0	0	Low	Very Low	Very Low	Very Low	Very Low	Very Low	Very Low	Very Low	Low	Very Low	Very Low	Low	1.68573	0	0	0	0	0	0	0.157335	1.47501	0	0	Very High	Very Low	Very Low	Very Low	Very Low	Very Low	Very Low	Very Low	Very High	Very Low	Very Low	Very High	Very High	0
11342	GB109053021960	0.00393292	0	0	0	0	0	0	0.000810092	0.003443	0	0	Very Low	Very Low	Very Low	Very Low	Very Low	Very Low	Very Low	Very Low	Very Low	Very Low	Very Low	Very Low	1.40011	0	0	0	0	0	0	0.130677	1.2251	0	0	Very High	Very Low	Very Low	Very Low	Very Low	Very Low	Very Low	Very Low	Very High	Very Low	Very Low	Very High	Very High	0
11342	GB109053027440	0.0038425	0	0	0	0	0	0	0.0031223	0.0134861	0	0	Very Low	Very Low	Very Low	Very Low	Very Low	Very Low	Very Low	Very Low	Very Low	Very Low	Very Low	Very Low	1.40011	0	0	0	0	0	0	0.130677	1.2251	0	0	Very High	Very Low	Very Low	Very Low	Very Low	Very Low	Very Low	Very Low	Very High	Very Low	Very Low	Very High	Very High	0
11348	GB109053021851	0.763602	0	0	0	0	0	0	0.231645	0.738657	0	0	High	Very Low	Very Low	Very Low	Very Low	Very Low	Very Low	Low	High	Very Low	Very Low	High	3.23015	0	0	0	0	0	0	0.301481	2.82639	0	0	Very High	Very Low	Very Low	Very Low	Very Low	Very Low	Very Low	Low	Very High	Very Low	Very Low	Very High	Very High	0
11557	GB109053022020	0.0464708	0	0	0	0	0	0	0.0074876	0.0383325	0	0	Very Low	Very Low	Very Low	Very Low	Very Low	Very Low	Very Low	Very Low	Very Low	Very Low	Very Low	Very Low	0.470452	0	0	0	0	0	0	0.0439089	0.411646	0	0	Moderate	Very Low	Very Low	Very Low	Very Low	Very Low	Very Low	Very Low	Moderate	Very Low	Very Low	Moderate	Moderate	0
11558	GB109053022240	0.0189182	0	0	0	0	0	0	0.00553148	0.0382637	0	0	Very Low	Very Low	Very Low	Very Low	Very Low	Very Low	Very Low	Very Low	Very Low	Very Low	Very Low	Very Low	0.060554	0	0	0	0	0	0	0.00565171	0.0529848	0	0	Very Low	Very Low	Very Low	Very Low	Very Low	Very Low	Very Low	Very Low	Very Low	Very Low	Very Low	Very Low	Very Low	0
11559	GB109053027690	0.130842	0	0	0	0	0	0	0.0216243	0.120298	0	0	Very Low	Very Low	Very Low	Very Low	Very Low	Very Low	Very Low	Very Low	Very Low	Very Low	Very Low	Very Low	0.405881	0	0	0	0	0	0	0.0378822	0.355146	0	0	Moderate	Very Low	Very Low	Very Low	Very Low	Very Low	Very Low	Very Low	Low	Very Low	Very Low	Moderate	Moderate	0
11560	GB109053021840	0.171331	0	0	0	0	0	0	0.020175	0.195646	0.0836848	0	Very Low	Very Low	Very Low	Very Low	Very Low	Very Low	Very Low	Very Low	Very Low	Very Low	Very Low	Very Low	1.27858	0	0	0	0	0	0	0.119335	1.11876	0.0913275	0	Very High	Very Low	Very Low	Very Low	Very Low	Very Low	Very Low	Very Low	Very High	Very Low	Very Low	Very High	Very High	0
11563	GB109053027510	0.00427736	0	0	0	0	0	0	0.0277541	0.00624603	0	0	Very Low	Very Low	Very Low	Very Low	Very Low	Very Low	Very Low	Very Low	Very Low	Very Low	Very Low	Very Low	0.574189	0	0	0	0	0	0	0.053591	0.502415	0	0	Moderate	Very Low	Very Low	Very Low	Very Low	Very Low	Very Low	Very Low	Moderate	Very Low	Very Low	Moderate	Moderate	0
11987	GB109053021840	0.0817112	0	0	0	0	0	0	0.00962187	0.0699807	0	0	Very Low	Very Low	Very Low	Very Low	Very Low	Very Low	Very Low	Very Low	Very Low	Very Low	Very Low	Very Low	0.384278	0	0	0	0	0	0	0.0358659	0.336243	0	0	Low	Very Low	Very Low	Very Low	Very Low	Very Low	Very Low	Very Low	Low	Very Low	Very Low	Low	Low	0
12129	GB109053027740	0.00878654	0	0	0	0	0	0	0.00375906	0.0251785	0	0	Very Low	Very Low	Very Low	Very Low	Very Low	Very Low	Very Low	Very Low	Very Low	Very Low	Very Low	Very Low	0.599003	0	0	0	0	0	0	0.055907	0.524128	0	0	Moderate	Very Low	Very Low	Very Low	Very Low	Very Low	Very Low	Very Low	Moderate	Very Low	Very Low	Moderate	Moderate	0
12129	GB109053027760	0.000874181	0	0	0	0	0	0	0.00145612	0.000786832	0	0	Very Low	Very Low	Very Low	Very Low	Very Low	Very Low	Very Low	Very Low	Very Low	Very Low	Very Low	Very Low	0.599003	0	0	0	0	0	0	0.055907	0.524128	0	0	Moderate	Very Low	Very Low	Very Low	Very Low	Very Low	Very Low	Very Low	Moderate	Very Low	Very Low	Moderate	Moderate	0
12549	GB109053021950	0.0298521	0	0	0	0	0	0	0.0351843	0.0993965	0	0	Very Low	Very Low	Very Low	Very Low	Very Low	Very Low	Very Low	Very Low	Very Low	Very Low	Very Low	Very Low	0.565115	0	0	0	0	0	0	0.0527441	0.494476	0	0	Moderate	Very Low	Very Low	Very Low	Very Low	Very Low	Very Low	Very Low	Moderate	Very Low	Very Low	Moderate	Moderate	0
12751	GB108052021380	0	0	0	0	0	0	0	0	0	0	0	Very Low	Very Low	Very Low	Very Low	Very Low	Very Low	Very Low	Very Low	Very Low	Very Low	Very Low	Very Low	NA	NA	NA	NA	NA	NA	NA	NA	NA	NA	NA	NA	NA	NA	NA	NA	NA	NA	NA	NA	NA	NA	NA	Very Low	0
16810027	GB112068060280	0	0	0	0	0	0	0	0	0	0	0	Very Low	Very Low	Very Low	Very Low	Very Low	Very Low	Very Low	Very Low	Very Low	Very Low	Very Low	Very Low	NA	NA	NA	NA	NA	NA	NA	NA	NA	NA	NA	NA	NA	NA	NA	NA	NA	NA	NA	NA	NA	NA	NA	Very Low	0
16810030	GB112068060250	0.0255369	0	0	0	0	0	0	0.0255369	0.0255369	0	0	Very Low	Very Low	Very Low	Very Low	Very Low	Very Low	Very Low	Very Low	Very Low	Very Low	Very Low	Very Low	0.0890693	0	0	0	0	0	0	0.0890693	0.0890693	0	0	Very Low	Very Low	Very Low	Very Low	Very Low	Very Low	Very Low	Very Low	Very Low	Very Low	Very Low	Very Low	Very Low	0
16810030	GB112068060260	1	0	0	0	0	0	0	1	1	0	0	Very High	Very Low	Very Low	Very Low	Very Low	Very Low	Very Low	Very High	Very High	Very Low	Very Low	Very High	0.0890693	0	0	0	0	0	0	0.0890693	0.0890693	0	0	Very Low	Very Low	Very Low	Very Low	Very Low	Very Low	Very Low	Very Low	Very Low	Very Low	Very Low	Very Low	Very High	0
16810030	GB112068060350	1	0	0	0	0	0	0	1	1	0	0	Very High	Very Low	Very Low	Very Low	Very Low	Very Low	Very Low	Very High	Very High	Very Low	Very Low	Very High	0.0890693	0	0	0	0	0	0	0.0890693	0.0890693	0	0	Very Low	Very Low	Very Low	Very Low	Very Low	Very Low	Very Low	Very Low	Very Low	Very Low	Very Low	Very Low	Very High	0
16810030	GB71210004	0.0103901	0	0	0	0	0	0	0.958558	0.0156615	0	0	Very Low	Very Low	Very Low	Very Low	Very Low	Very Low	Very Low	Very High	Very Low	Very Low	Very Low	Very High	0.0890693	0	0	0	0	0	0	0.0890693	0.0890693	0	0	Very Low	Very Low	Very Low	Very Low	Very Low	Very Low	Very Low	Very Low	Very Low	Very Low	Very Low	Very Low	Very High	0
16810035	GB112068060290	0.133645	0	0	0	0	0	0	0.0119725	0.118926	0	0	Very Low	Very Low	Very Low	Very Low	Very Low	Very Low	Very Low	Very Low	Very Low	Very Low	Very Low	Very Low	0.161876	0	0	0	0	0	0	0.0151084	0.141641	0	0	Very Low	Very Low	Very Low	Very Low	Very Low	Very Low	Very Low	Very Low	Very Low	Very Low	Very Low	Very Low	Very Low	0
16810036	GB111067056930	1	0	0	0	0	0	0	1	1	0	0	Very High	Very Low	Very Low	Very Low	Very Low	Very Low	Very Low	Very High	Very High	Very Low	Very Low	Very High	0.346131	0	0	0	0	0	0	0.00482486	0.0995126	0	0	Low	Very Low	Very Low	Very Low	Very Low	Very Low	Very Low	Very Low	Very Low	Very Low	Very Low	Low	Very High	0
16810042	GB112068055390	0.0602638	0	0	0	0	0	0	0.00158809	0.028022	0.110116	0	Very Low	Very Low	Very Low	Very Low	Very Low	Very Low	Very Low	Very Low	Very Low	Very Low	Very Low	Very Low	0.613035	0	0	0	0	0	0	0.00854534	0.176248	0.160225	0	High	Very Low	Very Low	Very Low	Very Low	Very Low	Very Low	Very Low	Very Low	Very Low	Very Low	High	High	0
16810042	GB112068074630	0.115372	0	0	0	0	0	0	0.00318461	0.036162	0.0481407	0	Very Low	Very Low	Very Low	Very Low	Very Low	Very Low	Very Low	Very Low	Very Low	Very Low	Very Low	Very Low	0.613035	0	0	0	0	0	0	0.00854534	0.176248	0.160225	0	High	Very Low	Very Low	Very Low	Very Low	Very Low	Very Low	Very Low	Very Low	Very Low	Very Low	High	High	0
16810044	GB112068055190	1	0	0	0	0	0	0	1	1	1	0	Very High	Very Low	Very Low	Very Low	Very Low	Very Low	Very Low	Very High	Very High	Very High	Very Low	Very High	0.0485417	0	0	0	0	0	0	0.00453056	0.042474	0.00346727	0	Very Low	Very Low	Very Low	Very Low	Very Low	Very Low	Very Low	Very Low	Very Low	Very Low	Very Low	Very Low	Very High	0
16810045	GB112068074630	0.341166	0	0	0	0	0	0	0.0551722	0.341724	0.04085	0	Low	Very Low	Very Low	Very Low	Very Low	Very Low	Very Low	Very Low	Low	Very Low	Very Low	Low	0.627765	0	0	0	0	0	0	0.0585914	0.549294	0.0448403	0	High	Very Low	Very Low	Very Low	Very Low	Very Low	Very Low	Very Low	Moderate	Very Low	Very Low	High	High	0
16810052	GB112068055360	0.0569978	0	0	0.0677161	0	0	0	0.0138713	0.040238	0	0	Very Low	Very Low	Very Low	Very Low	Very Low	Very Low	Very Low	Very Low	Very Low	Very Low	Very Low	Very Low	0.60233	0	0	0.110955	0	0	0	0.0562174	0.527038	0	0	High	Very Low	Very Low	Very Low	Very Low	Very Low	Very Low	Very Low	Moderate	Very Low	Very Low	High	High	0
16810057	GB112068055300	0.0447016	0	0	0	0	0	0	0	0.0393337	0.00333125	0	Very Low	Very Low	Very Low	Very Low	Very Low	Very Low	Very Low	Very Low	Very Low	Very Low	Very Low	Very Low	0.0467933	0	0	0	0	0	0	0	0.0409442	0.00334238	0	Very Low	Very Low	Very Low	Very Low	Very Low	Very Low	Very Low	Very Low	Very Low	Very Low	Very Low	Very Low	Very Low	0
16810066	GB112068055360	0.190508	0	0	0	0	0	0	0.301361	0.121042	0	0	Very Low	Very Low	Very Low	Very Low	Very Low	Very Low	Very Low	Low	Very Low	Very Low	Very Low	Low	2.6915	0	0	0	0	0	0	0.251206	2.35506	0	0	Very High	Very Low	Very Low	Very Low	Very Low	Very Low	Very Low	Low	Very High	Very Low	Very Low	Very High	Very High	0
16810066	GB112068055370	1	0	0	0	0	0	0	1	1	0	0	Very High	Very Low	Very Low	Very Low	Very Low	Very Low	Very Low	Very High	Very High	Very Low	Very Low	Very High	2.6915	0	0	0	0	0	0	0.251206	2.35506	0	0	Very High	Very Low	Very Low	Very Low	Very Low	Very Low	Very Low	Low	Very High	Very Low	Very Low	Very High	Very High	0
16810066	GB112068060190	0.461233	0	0	0	0	0	0	0.108436	0.435333	0	0	Moderate	Very Low	Very Low	Very Low	Very Low	Very Low	Very Low	Very Low	Moderate	Very Low	Very Low	Moderate	2.6915	0	0	0	0	0	0	0.251206	2.35506	0	0	Very High	Very Low	Very Low	Very Low	Very Low	Very Low	Very Low	Low	Very High	Very Low	Very Low	Very High	Very High	0
16810067	GB112068060440	0.0248687	0	0	0	0	0	0	0	0.0271369	0.00272501	0	Very Low	Very Low	Very Low	Very Low	Very Low	Very Low	Very Low	Very Low	Very Low	Very Low	Very Low	Very Low	0.0517031	0	0	0	0	0	0	0	0.0452402	0.00369308	0	Very Low	Very Low	Very Low	Very Low	Very Low	Very Low	Very Low	Very Low	Very Low	Very Low	Very Low	Very Low	Very Low	0
16810068	GB112068055240	0	0	0	0	0	0	0	0	0	0	0	Very Low	Very Low	Very Low	Very Low	Very Low	Very Low	Very Low	Very Low	Very Low	Very Low	Very Low	Very Low	2.12556	0.3629	0	0	0	0	0	0.198385	1.85986	0.151826	0	Very High	Low	Very Low	Very Low	Very Low	Very Low	Very Low	Very Low	Very High	Very Low	Very Low	Very High	Very High	0
16810068	GB112068055280	1	1	0	0	0	0	0	1	1	1	0	Very High	Very High	Very Low	Very Low	Very Low	Very Low	Very Low	Very High	Very High	Very High	Very Low	Very High	2.12556	0.3629	0	0	0	0	0	0.198385	1.85986	0.151826	0	Very High	Low	Very Low	Very Low	Very Low	Very Low	Very Low	Very Low	Very High	Very Low	Very Low	Very High	Very High	0
16810068	GB112068055310	1	1	0	0	0	0	0	1	1	1	0	Very High	Very High	Very Low	Very Low	Very Low	Very Low	Very Low	Very High	Very High	Very High	Very Low	Very High	2.12556	0.3629	0	0	0	0	0	0.198385	1.85986	0.151826	0	Very High	Low	Very Low	Very Low	Very Low	Very Low	Very Low	Very Low	Very High	Very Low	Very Low	Very High	Very High	0
16810068	GB112068055400	1	1	0	0	0	0	0	1	1	1	0	Very High	Very High	Very Low	Very Low	Very Low	Very Low	Very Low	Very High	Very High	Very High	Very Low	Very High	2.12556	0.3629	0	0	0	0	0	0.198385	1.85986	0.151826	0	Very High	Low	Very Low	Very Low	Very Low	Very Low	Very Low	Very Low	Very High	Very Low	Very Low	Very High	Very High	0
16810068	GB112068060460	0.191011	0.0987584	0	0	0	0	0	0.0222127	0.175358	0.0198197	0	Very Low	Very Low	Very Low	Very Low	Very Low	Very Low	Very Low	Very Low	Very Low	Very Low	Very Low	Very Low	2.12556	0.3629	0	0	0	0	0	0.198385	1.85986	0.151826	0	Very High	Low	Very Low	Very Low	Very Low	Very Low	Very Low	Very Low	Very High	Very Low	Very Low	Very High	Very High	0
16810068	GB112069064520	0.00105218	1	0	0	0	0	0	0.00104692	0.000525729	1	0	Very Low	Very High	Very Low	Very Low	Very Low	Very Low	Very Low	Very Low	Very Low	Very High	Very Low	Very High	2.12556	0.3629	0	0	0	0	0	0.198385	1.85986	0.151826	0	Very High	Low	Very Low	Very Low	Very Low	Very Low	Very Low	Very Low	Very High	Very Low	Very Low	Very High	Very High	0
16810068	GB112073071160	0.64662	0.997819	0	0	0	0	0	0.820613	0.732957	1	0	High	Very High	Very Low	Very Low	Very Low	Very Low	Very Low	Very High	High	Very High	Very Low	Very High	2.12556	0.3629	0	0	0	0	0	0.198385	1.85986	0.151826	0	Very High	Low	Very Low	Very Low	Very Low	Very Low	Very Low	Very Low	Very High	Very Low	Very Low	Very High	Very High	0
16810081	GB112068055460	0.00472787	0	0	0	0	0	0	0.000721117	0.00437539	0	0	Very Low	Very Low	Very Low	Very Low	Very Low	Very Low	Very Low	Very Low	Very Low	Very Low	Very Low	Very Low	0.751931	0	0	0	0	0	0	0.0701802	0.65794	0	0	High	Very Low	Very Low	Very Low	Very Low	Very Low	Very Low	Very Low	High	Very Low	Very Low	High	High	0
16810081	GB112068060190	0.122316	0	0	0	0	0	0	0.0165904	0.115448	0	0	Very Low	Very Low	Very Low	Very Low	Very Low	Very Low	Very Low	Very Low	Very Low	Very Low	Very Low	Very Low	0.751931	0	0	0	0	0	0	0.0701802	0.65794	0	0	High	Very Low	Very Low	Very Low	Very Low	Very Low	Very Low	Very Low	High	Very Low	Very Low	High	High	0
16810083	GB112068055390	0.16225	0	0	0	0	0	0	0.0200398	0.16073	0	0.0551564	Very Low	Very Low	Very Low	Very Low	Very Low	Very Low	Very Low	Very Low	Very Low	Very Low	Very Low	Very Low	0.483689	0	0	0	0	0	0	0.0451443	0.423228	0	0.0583762	Moderate	Very Low	Very Low	Very Low	Very Low	Very Low	Very Low	Very Low	Moderate	Very Low	Very Low	Moderate	Moderate	0
16810083	GB112068074630	0	0	0	0	0	0	0	0	0	0	0	Very Low	Very Low	Very Low	Very Low	Very Low	Very Low	Very Low	Very Low	Very Low	Very Low	Very Low	Very Low	0.483689	0	0	0	0	0	0	0.0451443	0.423228	0	0.0583762	Moderate	Very Low	Very Low	Very Low	Very Low	Very Low	Very Low	Very Low	Moderate	Very Low	Very Low	Moderate	Moderate	0
16810084	GB112068060550	0.478814	0	0	0	0	0	0	0.0789737	0.445634	0.0615804	0	Moderate	Very Low	Very Low	Very Low	Very Low	Very Low	Very Low	Very Low	Moderate	Very Low	Very Low	Moderate	0.9187	0	0	0	0	0	0	0.0857453	0.803862	0.0656214	0	Very High	Very Low	Very Low	Very Low	Very Low	Very Low	Very Low	Very Low	Very High	Very Low	Very Low	Very High	Very High	0
16810085	GB112068055390	0.126751	0	0	0	0	0	0	0.0173947	0.083709	0	0	Very Low	Very Low	Very Low	Very Low	Very Low	Very Low	Very Low	Very Low	Very Low	Very Low	Very Low	Very Low	0.674195	0	0	0	0	0	0	0.0629249	0.589921	0	0	High	Very Low	Very Low	Very Low	Very Low	Very Low	Very Low	Very Low	Moderate	Very Low	Very Low	High	High	0
16810091	GB112068055200	0.115033	0	0	0	0	0	0	0.0119865	0.102122	0	0	Very Low	Very Low	Very Low	Very Low	Very Low	Very Low	Very Low	Very Low	Very Low	Very Low	Very Low	Very Low	0.19647	0	0	0	0	0	0	0.0183372	0.171912	0	0	Very Low	Very Low	Very Low	Very Low	Very Low	Very Low	Very Low	Very Low	Very Low	Very Low	Very Low	Very Low	Very Low	0
16810091	GB112068055230	1	0	0	0	0	0	0	1	1	0	0	Very High	Very Low	Very Low	Very Low	Very Low	Very Low	Very Low	Very High	Very High	Very Low	Very Low	Very High	0.19647	0	0	0	0	0	0	0.0183372	0.171912	0	0	Very Low	Very Low	Very Low	Very Low	Very Low	Very Low	Very Low	Very Low	Very Low	Very Low	Very Low	Very Low	Very High	0
16810091	GB112071065490	3.23e-05	0	0	0	0	0	0	1.45e-05	0.00011562	0	0	Very Low	Very Low	Very Low	Very Low	Very Low	Very Low	Very Low	Very Low	Very Low	Very Low	Very Low	Very Low	0.19647	0	0	0	0	0	0	0.0183372	0.171912	0	0	Very Low	Very Low	Very Low	Very Low	Very Low	Very Low	Very Low	Very Low	Very Low	Very Low	Very Low	Very Low	Very Low	0
16810093	GB112068060540	0	0	0	0	0	0	0	0	0	0	0	Very Low	Very Low	Very Low	Very Low	Very Low	Very Low	Very Low	Very Low	Very Low	Very Low	Very Low	Very Low	NA	NA	NA	NA	NA	NA	NA	NA	NA	NA	NA	NA	NA	NA	NA	NA	NA	NA	NA	NA	NA	NA	NA	Very Low	0
16810096	GB112068055380	1	0	0	0	0	0	0	1	1	0	0	Very High	Very Low	Very Low	Very Low	Very Low	Very Low	Very Low	Very High	Very High	Very Low	Very Low	Very High	1.42254	0	0	0	0	0	0	0.0198294	0.408982	0	0	Very High	Very Low	Very Low	Very Low	Very Low	Very Low	Very Low	Very Low	Moderate	Very Low	Very Low	Very High	Very High	0
16810096	GB112068055460	0.383515	0	0	0	0	0	0	0.00931877	0.15549	0	0	Low	Very Low	Very Low	Very Low	Very Low	Very Low	Very Low	Very Low	Very Low	Very Low	Very Low	Low	1.42254	0	0	0	0	0	0	0.0198294	0.408982	0	0	Very High	Very Low	Very Low	Very Low	Very Low	Very Low	Very Low	Very Low	Moderate	Very Low	Very Low	Very High	Very High	0
16810097	GB112068060460	0.10448	0	0	0	0	0	0	0.00809998	0.0959179	0.0144547	0	Very Low	Very Low	Very Low	Very Low	Very Low	Very Low	Very Low	Very Low	Very Low	Very Low	Very Low	Very Low	0.979221	0	0	0	0	0	0	0.091394	0.856819	0.0699444	0	Very High	Very Low	Very Low	Very Low	Very Low	Very Low	Very Low	Very Low	Very High	Very Low	Very Low	Very High	Very High	0
16810098	GB112068060390	0.00500331	0	0	0	0	0	0	0.00368061	0.00355358	0	0	Very Low	Very Low	Very Low	Very Low	Very Low	Very Low	Very Low	Very Low	Very Low	Very Low	Very Low	Very Low	0.163327	0	0	0	0	0	0	0.0152438	0.142911	0	0	Very Low	Very Low	Very Low	Very Low	Very Low	Very Low	Very Low	Very Low	Very Low	Very Low	Very Low	Very Low	Very Low	0
16810099	GB112068060370	1	0	0	0	0	0	0	1	1	1	0	Very High	Very Low	Very Low	Very Low	Very Low	Very Low	Very Low	Very High	Very High	Very High	Very Low	Very High	2.99139	0	0	0	0	0	0	0.279196	2.61747	0.213671	0	Very High	Very Low	Very Low	Very Low	Very Low	Very Low	Very Low	Low	Very High	Low	Very Low	Very High	Very High	0
16810099	GB112068060390	0.930778	0	0	0	0	0	0	0.547771	0.944403	1	0	Very High	Very Low	Very Low	Very Low	Very Low	Very Low	Very Low	Moderate	Very High	Very High	Very Low	Very High	2.99139	0	0	0	0	0	0	0.279196	2.61747	0.213671	0	Very High	Very Low	Very Low	Very Low	Very Low	Very Low	Very Low	Low	Very High	Low	Very Low	Very High	Very High	0
16810099	GB112068060400	1	0	0	0	0	0	0	1	1	1	0	Very High	Very Low	Very Low	Very Low	Very Low	Very Low	Very Low	Very High	Very High	Very High	Very Low	Very High	2.99139	0	0	0	0	0	0	0.279196	2.61747	0.213671	0	Very High	Very Low	Very Low	Very Low	Very Low	Very Low	Very Low	Low	Very High	Low	Very Low	Very High	Very High	0
16810099	GB112068060420	1	0	0	0	0	0	0	1	1	1	0	Very High	Very Low	Very Low	Very Low	Very Low	Very Low	Very Low	Very High	Very High	Very High	Very Low	Very High	2.99139	0	0	0	0	0	0	0.279196	2.61747	0.213671	0	Very High	Very Low	Very Low	Very Low	Very Low	Very Low	Very Low	Low	Very High	Low	Very Low	Very High	Very High	0
16810099	GB112068060460	0.0301701	0	0	0	0	0	0	0.0116949	0.039568	0.00596287	0	Very Low	Very Low	Very Low	Very Low	Very Low	Very Low	Very Low	Very Low	Very Low	Very Low	Very Low	Very Low	2.99139	0	0	0	0	0	0	0.279196	2.61747	0.213671	0	Very High	Very Low	Very Low	Very Low	Very Low	Very Low	Very Low	Low	Very High	Low	Very Low	Very High	Very High	0
16810099	GB112068060470	1	0	0	0	0	0	0	1	1	1	0	Very High	Very Low	Very Low	Very Low	Very Low	Very Low	Very Low	Very High	Very High	Very High	Very Low	Very High	2.99139	0	0	0	0	0	0	0.279196	2.61747	0.213671	0	Very High	Very Low	Very Low	Very Low	Very Low	Very Low	Very Low	Low	Very High	Low	Very Low	Very High	Very High	0
16810099	GB112068060480	0.967861	0	0	0	0	0	0	0.937724	0.977284	1	0	Very High	Very Low	Very Low	Very Low	Very Low	Very Low	Very Low	Very High	Very High	Very High	Very Low	Very High	2.99139	0	0	0	0	0	0	0.279196	2.61747	0.213671	0	Very High	Very Low	Very Low	Very Low	Very Low	Very Low	Very Low	Low	Very High	Low	Very Low	Very High	Very High	0
16810099	GB112068060500	0.340881	0	0	0	0	0	0	0.0417667	0.324532	0.0436179	0	Low	Very Low	Very Low	Very Low	Very Low	Very Low	Very Low	Very Low	Low	Very Low	Very Low	Low	2.99139	0	0	0	0	0	0	0.279196	2.61747	0.213671	0	Very High	Very Low	Very Low	Very Low	Very Low	Very Low	Very Low	Low	Very High	Low	Very Low	Very High	Very High	0
16810099	GB112068060510	1	0	0	0	0	0	0	1	1	1	0	Very High	Very Low	Very Low	Very Low	Very Low	Very Low	Very Low	Very High	Very High	Very High	Very Low	Very High	2.99139	0	0	0	0	0	0	0.279196	2.61747	0.213671	0	Very High	Very Low	Very Low	Very Low	Very Low	Very Low	Very Low	Low	Very High	Low	Very Low	Very High	Very High	0
16810103	GB112068060390	0.000816353	0	0	0	0	0	0	0.000480431	0.000579812	0	0	Very Low	Very Low	Very Low	Very Low	Very Low	Very Low	Very Low	Very Low	Very Low	Very Low	Very Low	Very Low	0.0249129	0	0	0	0	0	0	0.0023252	0.0217988	0	0	Very Low	Very Low	Very Low	Very Low	Very Low	Very Low	Very Low	Very Low	Very Low	Very Low	Very Low	Very Low	Very Low	0
16810105	GB112068055440	0.0141074	0	0	0	0	0	0	0.00172114	0.00904402	0	0	Very Low	Very Low	Very Low	Very Low	Very Low	Very Low	Very Low	Very Low	Very Low	Very Low	Very Low	Very Low	0.0733525	0	0	0	0	0	0	0.00684624	0.0641835	0	0	Very Low	Very Low	Very Low	Very Low	Very Low	Very Low	Very Low	Very Low	Very Low	Very Low	Very Low	Very Low	Very Low	0
16810106	GB112068055410	1	0	0	0	0	0	0	1	1	0	0	Very High	Very Low	Very Low	Very Low	Very Low	Very Low	Very Low	Very High	Very High	Very Low	Very Low	Very High	0.379422	0	0	0	0	0	0	0.0354127	0.331994	0	0	Low	Very Low	Very Low	Very Low	Very Low	Very Low	Very Low	Very Low	Low	Very Low	Very Low	Low	Very High	0
16810106	GB112068055420	0.222976	0	0	0	0	0	0	0.0260845	0.200698	0	0	Low	Very Low	Very Low	Very Low	Very Low	Very Low	Very Low	Very Low	Low	Very Low	Very Low	Low	0.379422	0	0	0	0	0	0	0.0354127	0.331994	0	0	Low	Very Low	Very Low	Very Low	Very Low	Very Low	Very Low	Very Low	Low	Very Low	Very Low	Low	Low	0
16810106	GB112068055430	1	0	0	0	0	0	0	1	1	0	0	Very High	Very Low	Very Low	Very Low	Very Low	Very Low	Very Low	Very High	Very High	Very Low	Very Low	Very High	0.379422	0	0	0	0	0	0	0.0354127	0.331994	0	0	Low	Very Low	Very Low	Very Low	Very Low	Very Low	Very Low	Very Low	Low	Very Low	Very Low	Low	Very High	0
16810106	GB112068055460	0.0465555	0	0	0	0	0	0	0.00473391	0.0430846	0	0	Very Low	Very Low	Very Low	Very Low	Very Low	Very Low	Very Low	Very Low	Very Low	Very Low	Very Low	Very Low	0.379422	0	0	0	0	0	0	0.0354127	0.331994	0	0	Low	Very Low	Very Low	Very Low	Very Low	Very Low	Very Low	Very Low	Low	Very Low	Very Low	Low	Low	0
16810109	GB112068060410	0	0	0	0	0	0	0	0	0	0	0	Very Low	Very Low	Very Low	Very Low	Very Low	Very Low	Very Low	Very Low	Very Low	Very Low	Very Low	Very Low	NA	NA	NA	NA	NA	NA	NA	NA	NA	NA	NA	NA	NA	NA	NA	NA	NA	NA	NA	NA	NA	NA	NA	Very Low	0
16810110	GB112068055440	0.154375	0	0	0	0	0	0	0.0171219	0.14995	0	0	Very Low	Very Low	Very Low	Very Low	Very Low	Very Low	Very Low	Very Low	Very Low	Very Low	Very Low	Very Low	0.251384	0	0	0	0	0	0	0.0234625	0.219961	0	0	Low	Very Low	Very Low	Very Low	Very Low	Very Low	Very Low	Very Low	Low	Very Low	Very Low	Low	Low	0
16810113	GB112068060480	0.0321388	0	0	0	0	0	0	0.0622762	0.0227162	0	0	Very Low	Very Low	Very Low	Very Low	Very Low	Very Low	Very Low	Very Low	Very Low	Very Low	Very Low	Very Low	0.0815121	0	0	0	0	0	0	0.00760779	0.0713231	0	0	Very Low	Very Low	Very Low	Very Low	Very Low	Very Low	Very Low	Very Low	Very Low	Very Low	Very Low	Very Low	Very Low	0
16810113	GB112068060500	0.00279377	0	0	0	0	0	0	0.000684615	0.00186184	0	0	Very Low	Very Low	Very Low	Very Low	Very Low	Very Low	Very Low	Very Low	Very Low	Very Low	Very Low	Very Low	0.0815121	0	0	0	0	0	0	0.00760779	0.0713231	0	0	Very Low	Very Low	Very Low	Very Low	Very Low	Very Low	Very Low	Very Low	Very Low	Very Low	Very Low	Very Low	Very Low	0
16810114	GB112068060540	0	0	0	0	0	0	0	0	0	0	0	Very Low	Very Low	Very Low	Very Low	Very Low	Very Low	Very Low	Very Low	Very Low	Very Low	Very Low	Very Low	NA	NA	NA	NA	NA	NA	NA	NA	NA	NA	NA	NA	NA	NA	NA	NA	NA	NA	NA	NA	NA	NA	NA	Very Low	0
16810116	GB112068060460	0.114188	0	0	0	0	0	0	0.0331973	0.10483	0.0157978	0	Very Low	Very Low	Very Low	Very Low	Very Low	Very Low	Very Low	Very Low	Very Low	Very Low	Very Low	Very Low	0.798797	0	0	0	0	0	0	0.0745544	0.698947	0.0570569	0	High	Very Low	Very Low	Very Low	Very Low	Very Low	Very Low	Very Low	High	Very Low	Very Low	High	High	0
16810119	GB112068055210	1	0	0	0	0	0	0	1	1	1	0	Very High	Very Low	Very Low	Very Low	Very Low	Very Low	Very Low	Very High	Very High	Very High	Very Low	Very High	0.700839	0	0	0	0	0	0	0.0654117	0.613234	0.05006	0	High	Very Low	Very Low	Very Low	Very Low	Very Low	Very Low	Very Low	High	Very Low	Very Low	High	Very High	0
16810119	GB112068055250	1	0	0	0	0	0	0	1	1	1	0	Very High	Very Low	Very Low	Very Low	Very Low	Very Low	Very Low	Very High	Very High	Very High	Very Low	Very High	0.700839	0	0	0	0	0	0	0.0654117	0.613234	0.05006	0	High	Very Low	Very Low	Very Low	Very Low	Very Low	Very Low	Very Low	High	Very Low	Very Low	High	Very High	0
16810119	GB112068055470	0.0372043	0	0	0	0	0	0	0.00359362	0.0327058	0.00275254	0	Very Low	Very Low	Very Low	Very Low	Very Low	Very Low	Very Low	Very Low	Very Low	Very Low	Very Low	Very Low	0.700839	0	0	0	0	0	0	0.0654117	0.613234	0.05006	0	High	Very Low	Very Low	Very Low	Very Low	Very Low	Very Low	Very Low	High	Very Low	Very Low	High	High	0
16810187	GB112068060330	0.0621291	0	0	0	0	0	0	0.00614486	0.0547885	0	0	Very Low	Very Low	Very Low	Very Low	Very Low	Very Low	Very Low	Very Low	Very Low	Very Low	Very Low	Very Low	0.232217	0	0	0	0	0	0	0.0216735	0.20319	0	0	Low	Very Low	Very Low	Very Low	Very Low	Very Low	Very Low	Very Low	Low	Very Low	Very Low	Low	Low	0
16810187	GB112068060500	0.0252716	0	0	0	0	0	0	0.00154821	0.0187129	0	0	Very Low	Very Low	Very Low	Very Low	Very Low	Very Low	Very Low	Very Low	Very Low	Very Low	Very Low	Very Low	0.232217	0	0	0	0	0	0	0.0216735	0.20319	0	0	Low	Very Low	Very Low	Very Low	Very Low	Very Low	Very Low	Very Low	Low	Very Low	Very Low	Low	Low	0
16820127	GB112068060520	1	0	0	0	0	0	0	0	1	0	0	Very High	Very Low	Very Low	Very Low	Very Low	Very Low	Very Low	Very Low	Very High	Very Low	Very Low	Very High	5.32518	0	0	0	0	0	0	0	4.65953	0	0	Very High	Very Low	Very Low	Very Low	Very Low	Very Low	Very Low	Very Low	Very High	Very Low	Very Low	Very High	Very High	0
16820127	GB531206908100	0.0114361	0	0	0	0	0	0	0	0.0158371	0	0	Very Low	Very Low	Very Low	Very Low	Very Low	Very Low	Very Low	Very Low	Very Low	Very Low	Very Low	Very Low	5.32518	0	0	0	0	0	0	0	4.65953	0	0	Very High	Very Low	Very Low	Very Low	Very Low	Very Low	Very Low	Very Low	Very High	Very Low	Very Low	Very High	Very High	0
16820127	GB71210001	0.000192544	0	0	0	0	0	0	0	0.000129964	0	0	Very Low	Very Low	Very Low	Very Low	Very Low	Very Low	Very Low	Very Low	Very Low	Very Low	Very Low	Very Low	5.32518	0	0	0	0	0	0	0	4.65953	0	0	Very High	Very Low	Very Low	Very Low	Very Low	Very Low	Very Low	Very Low	Very High	Very Low	Very Low	Very High	Very High	0
16820127	GB71210004	0.082698	0	0	0	0	0	0	0	0.109072	0	0	Very Low	Very Low	Very Low	Very Low	Very Low	Very Low	Very Low	Very Low	Very Low	Very Low	Very Low	Very Low	5.32518	0	0	0	0	0	0	0	4.65953	0	0	Very High	Very Low	Very Low	Very Low	Very Low	Very Low	Very Low	Very Low	Very High	Very Low	Very Low	Very High	Very High	0
16820128	GB112069061382	0.0993508	0	0	0	0	0	0	0	0.0938643	0	0	Very Low	Very Low	Very Low	Very Low	Very Low	Very Low	Very Low	Very Low	Very Low	Very Low	Very Low	Very Low	1.15894	0	0	0	0	0	0	0	1.01407	0	0	Very High	Very Low	Very Low	Very Low	Very Low	Very Low	Very Low	Very Low	Very High	Very Low	Very Low	Very High	Very High	0
16820128	GB71210001	0.0805554	0	0	0	0	0	0	0	0.0543738	0	0	Very Low	Very Low	Very Low	Very Low	Very Low	Very Low	Very Low	Very Low	Very Low	Very Low	Very Low	Very Low	1.15894	0	0	0	0	0	0	0	1.01407	0	0	Very High	Very Low	Very Low	Very Low	Very Low	Very Low	Very Low	Very Low	Very High	Very Low	Very Low	Very High	Very High	0
16820128	GB71210004	0.167415	0	0	0	0	0	0	0	0.220808	0	0	Very Low	Very Low	Very Low	Very Low	Very Low	Very Low	Very Low	Very Low	Low	Very Low	Very Low	Low	1.15894	0	0	0	0	0	0	0	1.01407	0	0	Very High	Very Low	Very Low	Very Low	Very Low	Very Low	Very Low	Very Low	Very High	Very Low	Very Low	Very High	Very High	0
16892175	GB112068055430	0	0	0	0	0	0	0	0	0	0	0	Very Low	Very Low	Very Low	Very Low	Very Low	Very Low	Very Low	Very Low	Very Low	Very Low	Very Low	Very Low	NA	NA	NA	NA	NA	NA	NA	NA	NA	NA	NA	NA	NA	NA	NA	NA	NA	NA	NA	NA	NA	NA	NA	Very Low	0
16910001	GB112069061330	0.379962	0	0	0	0	0	0	0.0443853	0.410651	0.0369258	0	Low	Very Low	Very Low	Very Low	Very Low	Very Low	Very Low	Very Low	Moderate	Very Low	Very Low	Moderate	1.55495	0	0	0	0	0	0	0.145128	1.36058	0.111068	0	Very High	Very Low	Very Low	Very Low	Very Low	Very Low	Very Low	Very Low	Very High	Very Low	Very Low	Very High	Very High	0
16910004	GB112069061340	0.0334423	0	0	0	0	0	0	0.00757373	0.0273346	1	0	Very Low	Very Low	Very Low	Very Low	Very Low	Very Low	Very Low	Very Low	Very Low	Very High	Very Low	Very High	0.30879	0	0	0	0	0	0	0.0288204	0.270192	0.0220565	0	Low	Very Low	Very Low	Very Low	Very Low	Very Low	Very Low	Very Low	Low	Very Low	Very Low	Low	Very High	0
16910006	GB530905415405	4.33e-06	0	0	0	0	0	0	1	6.59e-06	0	0	Very Low	Very Low	Very Low	Very Low	Very Low	Very Low	Very Low	Very High	Very Low	Very Low	Very Low	Very High	0.0589425	0	0	0	0	0	0	0.0055013	0.0515746	0	0	Very Low	Very Low	Very Low	Very Low	Very Low	Very Low	Very Low	Very Low	Very Low	Very Low	Very Low	Very Low	Very High	0
16910007	GB112068060410	1	0	0	0	0	0	0	1	1	0	0	Very High	Very Low	Very Low	Very Low	Very Low	Very Low	Very Low	Very High	Very High	Very Low	Very Low	Very High	4.66887	0	0	0	0	0	0	1.98073	4.08526	0	0	Very High	Very Low	Very Low	Very Low	Very Low	Very Low	Very Low	Very High	Very High	Very Low	Very Low	Very High	Very High	0
16910007	GB112069061340	0.790803	0	0	0	0	0	0	0.651253	0.775651	0	0	High	Very Low	Very Low	Very Low	Very Low	Very Low	Very Low	High	High	Very Low	Very Low	High	4.66887	0	0	0	0	0	0	1.98073	4.08526	0	0	Very High	Very Low	Very Low	Very Low	Very Low	Very Low	Very Low	Very High	Very High	Very Low	Very Low	Very High	Very High	0
16910009	GB112069060650	1	0	0	1	0	0	0	1	1	0	0	Very High	Very Low	Very Low	Very High	Very Low	Very Low	Very Low	Very High	Very High	Very Low	Very Low	Very High	0.980221	0	0	0.180567	0	0	0	0.0914873	0.857693	0	0	Very High	Very Low	Very Low	Very Low	Very Low	Very Low	Very Low	Very Low	Very High	Very Low	Very Low	Very High	Very High	0
16910009	GB112069060660	1	0	0	1	0	0	0	1	1	0	0	Very High	Very Low	Very Low	Very High	Very Low	Very Low	Very Low	Very High	Very High	Very Low	Very Low	Very High	0.980221	0	0	0.180567	0	0	0	0.0914873	0.857693	0	0	Very High	Very Low	Very Low	Very Low	Very Low	Very Low	Very Low	Very Low	Very High	Very Low	Very Low	Very High	Very High	0
16910009	GB112069061320	0.38412	0	0	0.104175	0	0	0	0.0548015	0.353975	0	0	Low	Very Low	Very Low	Very Low	Very Low	Very Low	Very Low	Very Low	Low	Very Low	Very Low	Low	0.980221	0	0	0.180567	0	0	0	0.0914873	0.857693	0	0	Very High	Very Low	Very Low	Very Low	Very Low	Very Low	Very Low	Very Low	Very High	Very Low	Very Low	Very High	Very High	0
16910009	GB112069061360	0.236597	0	0	1	0	0	0	0.0533778	0.319246	0	0	Low	Very Low	Very Low	Very High	Very Low	Very Low	Very Low	Very Low	Low	Very Low	Very Low	Very High	0.980221	0	0	0.180567	0	0	0	0.0914873	0.857693	0	0	Very High	Very Low	Very Low	Very Low	Very Low	Very Low	Very Low	Very Low	Very High	Very Low	Very Low	Very High	Very High	0
16910010	GB112069061330	0.125816	0	0	0	0	0	0	0.0342933	0.0793201	0.01902	0	Very Low	Very Low	Very Low	Very Low	Very Low	Very Low	Very Low	Very Low	Very Low	Very Low	Very Low	Very Low	1.34664	0	0	0	0	0	0	0.125686	1.17831	0.0961884	0	Very High	Very Low	Very Low	Very Low	Very Low	Very Low	Very Low	Very Low	Very High	Very Low	Very Low	Very High	Very High	0
16910014	GB112069061320	0.0074079	0	0	0	0	0	0	0.0150981	0.00520118	0	0	Very Low	Very Low	Very Low	Very Low	Very Low	Very Low	Very Low	Very Low	Very Low	Very Low	Very Low	Very Low	0.146778	0	0	0	0	0	0	0.146778	0.146778	0	0	Very Low	Very Low	Very Low	Very Low	Very Low	Very Low	Very Low	Very Low	Very Low	Very Low	Very Low	Very Low	Very Low	0
16910014	GB112069061360	0.0290312	0	0	0	0	0	0	0.0935659	0.0298456	0	0	Very Low	Very Low	Very Low	Very Low	Very Low	Very Low	Very Low	Very Low	Very Low	Very Low	Very Low	Very Low	0.146778	0	0	0	0	0	0	0.146778	0.146778	0	0	Very Low	Very Low	Very Low	Very Low	Very Low	Very Low	Very Low	Very Low	Very Low	Very Low	Very Low	Very Low	Very Low	0
16910014	GB112069061381	4.4e-05	0	0	0	0	0	0	0.0031344	5.59e-05	0	0	Very Low	Very Low	Very Low	Very Low	Very Low	Very Low	Very Low	Very Low	Very Low	Very Low	Very Low	Very Low	0.146778	0	0	0	0	0	0	0.146778	0.146778	0	0	Very Low	Very Low	Very Low	Very Low	Very Low	Very Low	Very Low	Very Low	Very Low	Very Low	Very Low	Very Low	Very Low	0
16920130	GB112069061170	0.995032	0	0	0	0	0	0	0.99867	0.997609	0	0.992392	Very High	Very Low	Very Low	Very Low	Very Low	Very Low	Very Low	Very High	Very High	Very Low	Very High	Very High	1.58513	0	0	0	0	0	0	0.147946	1.38699	0	0.191309	Very High	Very Low	Very Low	Very Low	Very Low	Very Low	Very Low	Very Low	Very High	Very Low	Very Low	Very High	Very High	0
16920130	GB112069061200	0.197557	0	0	0	0	0	0	0.0665375	0.265179	0	0.0640988	Very Low	Very Low	Very Low	Very Low	Very Low	Very Low	Very Low	Very Low	Low	Very Low	Very Low	Low	1.58513	0	0	0	0	0	0	0.147946	1.38699	0	0.191309	Very High	Very Low	Very Low	Very Low	Very Low	Very Low	Very Low	Very Low	Very High	Very Low	Very Low	Very High	Very High	0
16920130	GB112069061210	1	0	0	0	0	0	0	1	1	0	1	Very High	Very Low	Very Low	Very Low	Very Low	Very Low	Very Low	Very High	Very High	Very Low	Very High	Very High	1.58513	0	0	0	0	0	0	0.147946	1.38699	0	0.191309	Very High	Very Low	Very Low	Very Low	Very Low	Very Low	Very Low	Very Low	Very High	Very Low	Very Low	Very High	Very High	0
16920130	GB112069061230	1	0	0	0	0	0	0	1	1	0	1	Very High	Very Low	Very Low	Very Low	Very Low	Very Low	Very Low	Very High	Very High	Very Low	Very High	Very High	1.58513	0	0	0	0	0	0	0.147946	1.38699	0	0.191309	Very High	Very Low	Very Low	Very Low	Very Low	Very Low	Very Low	Very Low	Very High	Very Low	Very Low	Very High	Very High	0
16920130	GB112069061240	1	0	0	0	0	0	0	1	1	0	1	Very High	Very Low	Very Low	Very Low	Very Low	Very Low	Very Low	Very High	Very High	Very Low	Very High	Very High	1.58513	0	0	0	0	0	0	0.147946	1.38699	0	0.191309	Very High	Very Low	Very Low	Very Low	Very Low	Very Low	Very Low	Very Low	Very High	Very Low	Very Low	Very High	Very High	0
16920134	GB112069060760	0.721955	0	0	0	0	0	0	0.195355	0.694161	0	0	High	Very Low	Very Low	Very Low	Very Low	Very Low	Very Low	Very Low	High	Very Low	Very Low	High	6.15865	0	0	0	0	0	0	0.574807	5.38882	0	0	Very High	Very Low	Very Low	Very Low	Very Low	Very Low	Very Low	Moderate	Very High	Very Low	Very Low	Very High	Very High	0
16920134	GB112069060810	1	0	0	0	0	0	0	1	1	0	0	Very High	Very Low	Very Low	Very Low	Very Low	Very Low	Very Low	Very High	Very High	Very Low	Very Low	Very High	6.15865	0	0	0	0	0	0	0.574807	5.38882	0	0	Very High	Very Low	Very Low	Very Low	Very Low	Very Low	Very Low	Moderate	Very High	Very Low	Very Low	Very High	Very High	0
16920134	GB112069060820	0.263084	0	0	0	0	0	0	0.0621065	0.29518	0	0	Low	Very Low	Very Low	Very Low	Very Low	Very Low	Very Low	Very Low	Low	Very Low	Very Low	Low	6.15865	0	0	0	0	0	0	0.574807	5.38882	0	0	Very High	Very Low	Very Low	Very Low	Very Low	Very Low	Very Low	Moderate	Very High	Very Low	Very Low	Very High	Very High	0
16920134	GB112069061100	0.0549475	0	0	0	0	0	0	0.0258414	0.146937	0	0	Very Low	Very Low	Very Low	Very Low	Very Low	Very Low	Very Low	Very Low	Very Low	Very Low	Very Low	Very Low	6.15865	0	0	0	0	0	0	0.574807	5.38882	0	0	Very High	Very Low	Very Low	Very Low	Very Low	Very Low	Very Low	Moderate	Very High	Very Low	Very Low	Very High	Very High	0
16920135	GB112069061100	0.65841	0	0	0	0	0	0	0.0246644	0.308538	0	0	High	Very Low	Very Low	Very Low	Very Low	Very Low	Very Low	Very Low	Low	Very Low	Very Low	High	3.85782	0	0	0	0	0	0	0.0537757	1.10912	0	0	Very High	Very Low	Very Low	Very Low	Very Low	Very Low	Very Low	Very Low	Very High	Very Low	Very Low	Very High	Very High	0
16920350	GB112069060760	0.00069915	0	0	0	0	0	0	0.000567552	0.00107557	0	0	Very Low	Very Low	Very Low	Very Low	Very Low	Very Low	Very Low	Very Low	Very Low	Very Low	Very Low	Very Low	1.03564	0	0	0	0	0	0	0.0966594	0.906182	0	0	Very High	Very Low	Very Low	Very Low	Very Low	Very Low	Very Low	Very Low	Very High	Very Low	Very Low	Very High	Very High	0
16920350	GB112069061420	0.208765	0	0	0	0	0	0	0.0433846	0.32143	0	0	Low	Very Low	Very Low	Very Low	Very Low	Very Low	Very Low	Very Low	Low	Very Low	Very Low	Low	1.03564	0	0	0	0	0	0	0.0966594	0.906182	0	0	Very High	Very Low	Very Low	Very Low	Very Low	Very Low	Very Low	Very Low	Very High	Very Low	Very Low	Very High	Very High	0
16920350	GB112069064520	0.0018272	0	0	0	0	0	0	0.00681776	0.00304323	0	0	Very Low	Very Low	Very Low	Very Low	Very Low	Very Low	Very Low	Very Low	Very Low	Very Low	Very Low	Very Low	1.03564	0	0	0	0	0	0	0.0966594	0.906182	0	0	Very High	Very Low	Very Low	Very Low	Very Low	Very Low	Very Low	Very Low	Very High	Very Low	Very Low	Very High	Very High	0
16930106	GB112069060630	0.363827	0	0	0	0	0	0	0	0.333516	0.0392467	0	Low	Very Low	Very Low	Very Low	Very Low	Very Low	Very Low	Very Low	Low	Very Low	Very Low	Low	0.571899	0	0	0	0	0	0	0	0.500412	0.04085	0	Moderate	Very Low	Very Low	Very Low	Very Low	Very Low	Very Low	Very Low	Moderate	Very Low	Very Low	Moderate	Moderate	0
16930108	GB112069061442	0.110878	0	0	0	0	0	0	0.0102702	0.0769668	0	0	Very Low	Very Low	Very Low	Very Low	Very Low	Very Low	Very Low	Very Low	Very Low	Very Low	Very Low	Very Low	0.259328	0	0	0	0	0	0	0.024204	0.226912	0	0	Low	Very Low	Very Low	Very Low	Very Low	Very Low	Very Low	Very Low	Low	Very Low	Very Low	Low	Low	0
16930111	GB112068060270	0.00514812	0	0	0	0	0	0	1	0.0127717	0	0	Very Low	Very Low	Very Low	Very Low	Very Low	Very Low	Very Low	Very High	Very Low	Very Low	Very Low	Very High	0.621937	0	0	0	0	0	0	0.0580474	0.544195	0	0	High	Very Low	Very Low	Very Low	Very Low	Very Low	Very Low	Very Low	Moderate	Very Low	Very Low	High	Very High	0
16930111	GB112069061441	1	0	0	0	0	0	0	1	1	0	0	Very High	Very Low	Very Low	Very Low	Very Low	Very Low	Very Low	Very High	Very High	Very Low	Very Low	Very High	0.621937	0	0	0	0	0	0	0.0580474	0.544195	0	0	High	Very Low	Very Low	Very Low	Very Low	Very Low	Very Low	Very Low	Moderate	Very Low	Very Low	High	Very High	0
16930111	GB112069061442	0.159983	0	0	0	0	0	0	0.0266736	0.185089	0	0	Very Low	Very Low	Very Low	Very Low	Very Low	Very Low	Very Low	Very Low	Very Low	Very Low	Very Low	Very Low	0.621937	0	0	0	0	0	0	0.0580474	0.544195	0	0	High	Very Low	Very Low	Very Low	Very Low	Very Low	Very Low	Very Low	Moderate	Very Low	Very Low	High	High	0
16930112	GB112069060580	0.410963	0.106439	0	0	0	0	0	0.0611364	0.379066	0	0	Moderate	Very Low	Very Low	Very Low	Very Low	Very Low	Very Low	Very Low	Low	Very Low	Very Low	Moderate	0.697687	0.119117	0	0	0	0	0	0.0651174	0.610476	0	0	High	Very Low	Very Low	Very Low	Very Low	Very Low	Very Low	Very Low	High	Very Low	Very Low	High	High	0
16930114	GB112069061441	0	0	0	0	0	0	0	0	0	0	0	Very Low	Very Low	Very Low	Very Low	Very Low	Very Low	Very Low	Very Low	Very Low	Very Low	Very Low	Very Low	NA	NA	NA	NA	NA	NA	NA	NA	NA	NA	NA	NA	NA	NA	NA	NA	NA	NA	NA	NA	NA	NA	NA	Very Low	0
16930121	GB112069060680	0.505418	0	0	0.158424	0	0	0	0.0870732	0.472064	0	0	Moderate	Very Low	Very Low	Very Low	Very Low	Very Low	Very Low	Very Low	Moderate	Very Low	Very Low	Moderate	1.28251	0	0	0.236252	0	0	0	0.119701	1.12219	0	0	Very High	Very Low	Very Low	Low	Very Low	Very Low	Very Low	Very Low	Very High	Very Low	Very Low	Very High	Very High	0
16930121	GB112069060710	1	0	0	1	0	0	0	1	1	0	0	Very High	Very Low	Very Low	Very High	Very Low	Very Low	Very Low	Very High	Very High	Very Low	Very Low	Very High	1.28251	0	0	0.236252	0	0	0	0.119701	1.12219	0	0	Very High	Very Low	Very Low	Low	Very Low	Very Low	Very Low	Very Low	Very High	Very Low	Very Low	Very High	Very High	0
16930122	GB112069061390	0.10567	0	0	0	0	0	0	0.0170008	0.116134	0	0	Very Low	Very Low	Very Low	Very Low	Very Low	Very Low	Very Low	Very Low	Very Low	Very Low	Very Low	Very Low	0.200087	0	0	0	0	0	0	0.0186748	0.175076	0	0	Low	Very Low	Very Low	Very Low	Very Low	Very Low	Very Low	Very Low	Very Low	Very Low	Very Low	Low	Low	0
16930486	GB112069064510	0.0389109	0	0	0	0	0	0	0.00376449	0.0342134	0	0	Very Low	Very Low	Very Low	Very Low	Very Low	Very Low	Very Low	Very Low	Very Low	Very Low	Very Low	Very Low	0.0404862	0	0	0	0	0	0	0.00377872	0.0354255	0	0	Very Low	Very Low	Very Low	Very Low	Very Low	Very Low	Very Low	Very Low	Very Low	Very Low	Very Low	Very Low	Very Low	0
16940002	GB112069061382	0.368389	0	0	0	0	0	0	0	0.348045	0	0	Low	Very Low	Very Low	Very Low	Very Low	Very Low	Very Low	Very Low	Low	Very Low	Very Low	Low	2.61781	0	0	0	0	0	0	0	2.29058	0	0	Very High	Very Low	Very Low	Very Low	Very Low	Very Low	Very Low	Very Low	Very High	Very Low	Very Low	Very High	Very High	0
16940003	GB112069061382	0.131724	0	0	0	0	0	0	0	0.12445	0	0	Very Low	Very Low	Very Low	Very Low	Very Low	Very Low	Very Low	Very Low	Very Low	Very Low	Very Low	Very Low	0.540627	0	0	0	0	0	0	0	0.473049	0	0	Moderate	Very Low	Very Low	Very Low	Very Low	Very Low	Very Low	Very Low	Moderate	Very Low	Very Low	Moderate	Moderate	0
16940085	GB112069061112	0.200321	0	0	0	0	0	0	0.0756892	0.0850106	0	0	Low	Very Low	Very Low	Very Low	Very Low	Very Low	Very Low	Very Low	Very Low	Very Low	Very Low	Low	10.6006	0	0	0	0	0	0	0.766014	1.6431	0	0	Very High	Very Low	Very Low	Very Low	Very Low	Very Low	Very Low	High	Very High	Very Low	Very Low	Very High	Very High	0
16940085	GB112069061151	0.854122	0	0	0	0	0	0	0.900046	0.427534	0	0	Very High	Very Low	Very Low	Very Low	Very Low	Very Low	Very Low	Very High	Moderate	Very Low	Very Low	Very High	10.6006	0	0	0	0	0	0	0.766014	1.6431	0	0	Very High	Very Low	Very Low	Very Low	Very Low	Very Low	Very Low	High	Very High	Very Low	Very Low	Very High	Very High	0
16940085	GB112069061152	0.0471783	0	0	0	0	0	0	0.0535555	0.00822916	0	0	Very Low	Very Low	Very Low	Very Low	Very Low	Very Low	Very Low	Very Low	Very Low	Very Low	Very Low	Very Low	10.6006	0	0	0	0	0	0	0.766014	1.6431	0	0	Very High	Very Low	Very Low	Very Low	Very Low	Very Low	Very Low	High	Very High	Very Low	Very Low	Very High	Very High	0
16940087	GB112069060940	0.00146097	0	0	0	0	0	0	0.00581838	0.00162304	0	0	Very Low	Very Low	Very Low	Very Low	Very Low	Very Low	Very Low	Very Low	Very Low	Very Low	Very Low	Very Low	4.20028	0	0	0	0	0	0	0.392026	3.67525	0	0	Very High	Very Low	Very Low	Very Low	Very Low	Very Low	Very Low	Low	Very High	Very Low	Very Low	Very High	Very High	0
16940087	GB112069061111	0.216555	0	0	0	0	0	0	0.0634056	0.230843	0	0	Low	Very Low	Very Low	Very Low	Very Low	Very Low	Very Low	Very Low	Low	Very Low	Very Low	Low	4.20028	0	0	0	0	0	0	0.392026	3.67525	0	0	Very High	Very Low	Very Low	Very Low	Very Low	Very Low	Very Low	Low	Very High	Very Low	Very Low	Very High	Very High	0
16940087	GB112069061112	0.104495	0	0	0	0	0	0	0.0679945	0.278148	0	0	Very Low	Very Low	Very Low	Very Low	Very Low	Very Low	Very Low	Very Low	Low	Very Low	Very Low	Low	4.20028	0	0	0	0	0	0	0.392026	3.67525	0	0	Very High	Very Low	Very Low	Very Low	Very Low	Very Low	Very Low	Low	Very High	Very Low	Very Low	Very High	Very High	0
16940087	GB112069061452	0.000593613	0	0	0	0	0	0	0.000241259	0.000583553	0	0	Very Low	Very Low	Very Low	Very Low	Very Low	Very Low	Very Low	Very Low	Very Low	Very Low	Very Low	Very Low	4.20028	0	0	0	0	0	0	0.392026	3.67525	0	0	Very High	Very Low	Very Low	Very Low	Very Low	Very Low	Very Low	Low	Very High	Very Low	Very Low	Very High	Very High	0
16940088	GB112069061050	0.0070762	0	0	0	0	0	0	0.000406788	0.00133928	0	0	Very Low	Very Low	Very Low	Very Low	Very Low	Very Low	Very Low	Very Low	Very Low	Very Low	Very Low	Very Low	17.447	0	0	0	0	0	0	0.327792	2.70429	0	0	Very High	Very Low	Very Low	Very Low	Very Low	Very Low	Very Low	Low	Very High	Very Low	Very Low	Very High	Very High	0
16940088	GB112069061112	0.563245	0	0	0	0	0	0	0.0983686	0.265584	0	0	Moderate	Very Low	Very Low	Very Low	Very Low	Very Low	Very Low	Very Low	Low	Very Low	Very Low	Moderate	17.447	0	0	0	0	0	0	0.327792	2.70429	0	0	Very High	Very Low	Very Low	Very Low	Very Low	Very Low	Very Low	Low	Very High	Very Low	Very Low	Very High	Very High	0
16940088	GB112069061280	1	0	0	0	0	0	0	1	1	0	0	Very High	Very Low	Very Low	Very Low	Very Low	Very Low	Very Low	Very High	Very High	Very Low	Very Low	Very High	17.447	0	0	0	0	0	0	0.327792	2.70429	0	0	Very High	Very Low	Very Low	Very Low	Very Low	Very Low	Very Low	Low	Very High	Very Low	Very Low	Very High	Very High	0
16940089	GB112069061111	0.477426	0	0	0	0	0	0	0.232978	0.458034	0	0	Moderate	Very Low	Very Low	Very Low	Very Low	Very Low	Very Low	Low	Moderate	Very Low	Very Low	Moderate	3.78372	0	0	0	0	0	0	0.353147	3.31076	0	0	Very High	Very Low	Very Low	Very Low	Very Low	Very Low	Very Low	Low	Very High	Very Low	Very Low	Very High	Very High	0
16940090	GB102076070940	0	0	0	0	0	0	0	0	0	0	0	Very Low	Very Low	Very Low	Very Low	Very Low	Very Low	Very Low	Very Low	Very Low	Very Low	Very Low	Very Low	4.03902	0	0	0	0	0	0	0.376975	3.53414	0	0	Very High	Very Low	Very Low	Very Low	Very Low	Very Low	Very Low	Low	Very High	Very Low	Very Low	Very High	Very High	0
16940090	GB112069061111	0.179466	0	0	0	0	0	0	0.0437885	0.172176	0	0	Very Low	Very Low	Very Low	Very Low	Very Low	Very Low	Very Low	Very Low	Very Low	Very Low	Very Low	Very Low	4.03902	0	0	0	0	0	0	0.376975	3.53414	0	0	Very High	Very Low	Very Low	Very Low	Very Low	Very Low	Very Low	Low	Very High	Very Low	Very Low	Very High	Very High	0
16940090	GB112069064741	0.760165	0	0	0	0	0	0	0.22829	0.734983	0	0	High	Very Low	Very Low	Very Low	Very Low	Very Low	Very Low	Low	High	Very Low	Very Low	High	4.03902	0	0	0	0	0	0	0.376975	3.53414	0	0	Very High	Very Low	Very Low	Very Low	Very Low	Very Low	Very Low	Low	Very High	Very Low	Very Low	Very High	Very High	0
16940133	GB112069061011	0.013475	0	0	0	0	0	0	0.0511051	0.0135417	0	0	Very Low	Very Low	Very Low	Very Low	Very Low	Very Low	Very Low	Very Low	Very Low	Very Low	Very Low	Very Low	1.46648	0	0	0	0	0	0	0.136872	1.28317	0	0	Very High	Very Low	Very Low	Very Low	Very Low	Very Low	Very Low	Very Low	Very High	Very Low	Very Low	Very High	Very High	0
16940133	GB112069061420	0.339574	0	0	0	0	0	0	0.0564551	0.167307	0	0	Low	Very Low	Very Low	Very Low	Very Low	Very Low	Very Low	Very Low	Very Low	Very Low	Very Low	Low	1.46648	0	0	0	0	0	0	0.136872	1.28317	0	0	Very High	Very Low	Very Low	Very Low	Very Low	Very Low	Very Low	Very Low	Very High	Very Low	Very Low	Very High	Very High	0
16940139	GB112069061100	0.0562859	0	0	0	0	0	0	0.0397062	0.120413	0	0.102182	Very Low	Very Low	Very Low	Very Low	Very Low	Very Low	Very Low	Very Low	Very Low	Very Low	Very Low	Very Low	0.943007	0	0	0	0	0	0	0.088014	0.825132	0	0.113811	Very High	Very Low	Very Low	Very Low	Very Low	Very Low	Very Low	Very Low	Very High	Very Low	Very Low	Very High	Very High	0
16940141	GB112069060980	0.200631	0	0	0	0	0	0	0.0182065	0.236006	0	0	Low	Very Low	Very Low	Very Low	Very Low	Very Low	Very Low	Very Low	Low	Very Low	Very Low	Low	0.81207	0	0	0	0	0	0	0.0757932	0.710561	0	0	Very High	Very Low	Very Low	Very Low	Very Low	Very Low	Very Low	Very Low	High	Very Low	Very Low	Very High	Very High	0
16940141	GB112069061260	0.139061	0	0	0	0	0	0	0.287651	0.25178	0	0	Very Low	Very Low	Very Low	Very Low	Very Low	Very Low	Very Low	Low	Low	Very Low	Very Low	Low	0.81207	0	0	0	0	0	0	0.0757932	0.710561	0	0	Very High	Very Low	Very Low	Very Low	Very Low	Very Low	Very Low	Very Low	High	Very Low	Very Low	Very High	Very High	0
16940141	GB112071065270	0.00654963	0	0	0	0	0	0	0.00179535	0.00799844	0	0	Very Low	Very Low	Very Low	Very Low	Very Low	Very Low	Very Low	Very Low	Very Low	Very Low	Very Low	Very Low	0.81207	0	0	0	0	0	0	0.0757932	0.710561	0	0	Very High	Very Low	Very Low	Very Low	Very Low	Very Low	Very Low	Very Low	High	Very Low	Very Low	Very High	Very High	0
16940143	GB112069060660	0	0	0	0	0	0	0	0	0	0	0	Very Low	Very Low	Very Low	Very Low	Very Low	Very Low	Very Low	Very Low	Very Low	Very Low	Very Low	Very Low	5.76775	0	0	0	0	0	0	0.538323	5.04678	0	0	Very High	Very Low	Very Low	Very Low	Very Low	Very Low	Very Low	Moderate	Very High	Very Low	Very Low	Very High	Very High	0
16940143	GB112069060900	1	0	0	0	0	0	0	1	1	0	0	Very High	Very Low	Very Low	Very Low	Very Low	Very Low	Very Low	Very High	Very High	Very Low	Very Low	Very High	5.76775	0	0	0	0	0	0	0.538323	5.04678	0	0	Very High	Very Low	Very Low	Very Low	Very Low	Very Low	Very Low	Moderate	Very High	Very Low	Very Low	Very High	Very High	0
16940143	GB112069060940	0.998539	0	0	0	0	0	0	0.994182	0.998377	0	0	Very High	Very Low	Very Low	Very Low	Very Low	Very Low	Very Low	Very High	Very High	Very Low	Very Low	Very High	5.76775	0	0	0	0	0	0	0.538323	5.04678	0	0	Very High	Very Low	Very Low	Very Low	Very Low	Very Low	Very Low	Moderate	Very High	Very Low	Very Low	Very High	Very High	0
16940143	GB112069061030	0.507805	0	0	0	0	0	0	0.0287751	0.457492	0	0	Moderate	Very Low	Very Low	Very Low	Very Low	Very Low	Very Low	Very Low	Moderate	Very Low	Very Low	Moderate	5.76775	0	0	0	0	0	0	0.538323	5.04678	0	0	Very High	Very Low	Very Low	Very Low	Very Low	Very Low	Very Low	Moderate	Very High	Very Low	Very Low	Very High	Very High	0
16940143	GB112069061040	1	0	0	0	0	0	0	1	1	0	0	Very High	Very Low	Very Low	Very Low	Very Low	Very Low	Very Low	Very High	Very High	Very Low	Very Low	Very High	5.76775	0	0	0	0	0	0	0.538323	5.04678	0	0	Very High	Very Low	Very Low	Very Low	Very Low	Very Low	Very Low	Moderate	Very High	Very Low	Very Low	Very High	Very High	0
16940143	GB112069061060	0.999842	0	0	0	0	0	0	0.99937	0.999685	0	0	Very High	Very Low	Very Low	Very Low	Very Low	Very Low	Very Low	Very High	Very High	Very Low	Very Low	Very High	5.76775	0	0	0	0	0	0	0.538323	5.04678	0	0	Very High	Very Low	Very Low	Very Low	Very Low	Very Low	Very Low	Moderate	Very High	Very Low	Very Low	Very High	Very High	0
16940143	GB112069061112	0.0114405	0	0	0	0	0	0	0.00186108	0.0274076	0	0	Very Low	Very Low	Very Low	Very Low	Very Low	Very Low	Very Low	Very Low	Very Low	Very Low	Very Low	Very Low	5.76775	0	0	0	0	0	0	0.538323	5.04678	0	0	Very High	Very Low	Very Low	Very Low	Very Low	Very Low	Very Low	Moderate	Very High	Very Low	Very Low	Very High	Very High	0
16940143	GB112069061120	0.41216	0	0	0	0	0	0	0.0353008	0.190897	0	0	Moderate	Very Low	Very Low	Very Low	Very Low	Very Low	Very Low	Very Low	Very Low	Very Low	Very Low	Moderate	5.76775	0	0	0	0	0	0	0.538323	5.04678	0	0	Very High	Very Low	Very Low	Very Low	Very Low	Very Low	Very Low	Moderate	Very High	Very Low	Very Low	Very High	Very High	0
16940143	GB112069061131	1	0	0	0	0	0	0	1	1	0	0	Very High	Very Low	Very Low	Very Low	Very Low	Very Low	Very Low	Very High	Very High	Very Low	Very Low	Very High	5.76775	0	0	0	0	0	0	0.538323	5.04678	0	0	Very High	Very Low	Very Low	Very Low	Very Low	Very Low	Very Low	Moderate	Very High	Very Low	Very Low	Very High	Very High	0
16940143	GB112069061151	0.113976	0	0	0	0	0	0	0.0517095	0.322063	0	0	Very Low	Very Low	Very Low	Very Low	Very Low	Very Low	Very Low	Very Low	Low	Very Low	Very Low	Low	5.76775	0	0	0	0	0	0	0.538323	5.04678	0	0	Very High	Very Low	Very Low	Very Low	Very Low	Very Low	Very Low	Moderate	Very High	Very Low	Very Low	Very High	Very High	0
16940143	GB112069061152	0.909759	0	0	0	0	0	0	0.444631	0.89581	0	0	Very High	Very Low	Very Low	Very Low	Very Low	Very Low	Very Low	Moderate	Very High	Very Low	Very Low	Very High	5.76775	0	0	0	0	0	0	0.538323	5.04678	0	0	Very High	Very Low	Very Low	Very Low	Very Low	Very Low	Very Low	Moderate	Very High	Very Low	Very Low	Very High	Very High	0
16940143	GB112069061161	0.869768	0	0	0	0	0	0	0.821798	0.89771	0	0	Very High	Very Low	Very Low	Very Low	Very Low	Very Low	Very Low	Very High	Very High	Very Low	Very Low	Very High	5.76775	0	0	0	0	0	0	0.538323	5.04678	0	0	Very High	Very Low	Very Low	Very Low	Very Low	Very Low	Very Low	Moderate	Very High	Very Low	Very Low	Very High	Very High	0
16940143	GB112069061210	0	0	0	0	0	0	0	0	0	0	0	Very Low	Very Low	Very Low	Very Low	Very Low	Very Low	Very Low	Very Low	Very Low	Very Low	Very Low	Very Low	5.76775	0	0	0	0	0	0	0.538323	5.04678	0	0	Very High	Very Low	Very Low	Very Low	Very Low	Very Low	Very Low	Moderate	Very High	Very Low	Very Low	Very High	Very High	0
16940143	GB112069061260	0.860939	0	0	0	0	0	0	0.712349	0.74822	0	0	Very High	Very Low	Very Low	Very Low	Very Low	Very Low	Very Low	High	High	Very Low	Very Low	Very High	5.76775	0	0	0	0	0	0	0.538323	5.04678	0	0	Very High	Very Low	Very Low	Very Low	Very Low	Very Low	Very Low	Moderate	Very High	Very Low	Very Low	Very High	Very High	0
16940143	GB112069061360	0.476359	0	0	0	0	0	0	0.0214939	0.385657	0	0	Moderate	Very Low	Very Low	Very Low	Very Low	Very Low	Very Low	Very Low	Low	Very Low	Very Low	Moderate	5.76775	0	0	0	0	0	0	0.538323	5.04678	0	0	Very High	Very Low	Very Low	Very Low	Very Low	Very Low	Very Low	Moderate	Very High	Very Low	Very Low	Very High	Very High	0
16940143	GB112069061381	0.999956	0	0	0	0	0	0	0.996866	0.999944	0	0	Very High	Very Low	Very Low	Very Low	Very Low	Very Low	Very Low	Very High	Very High	Very Low	Very Low	Very High	5.76775	0	0	0	0	0	0	0.538323	5.04678	0	0	Very High	Very Low	Very Low	Very Low	Very Low	Very Low	Very Low	Moderate	Very High	Very Low	Very Low	Very High	Very High	0
16940143	GB112069061382	0	0	0	0	0	0	0	0	0	0	0	Very Low	Very Low	Very Low	Very Low	Very Low	Very Low	Very Low	Very Low	Very Low	Very Low	Very Low	Very Low	5.76775	0	0	0	0	0	0	0.538323	5.04678	0	0	Very High	Very Low	Very Low	Very Low	Very Low	Very Low	Very Low	Moderate	Very High	Very Low	Very Low	Very High	Very High	0
16940143	GB112069061410	1	0	0	0	0	0	0	1	1	0	0	Very High	Very Low	Very Low	Very Low	Very Low	Very Low	Very Low	Very High	Very High	Very Low	Very Low	Very High	5.76775	0	0	0	0	0	0	0.538323	5.04678	0	0	Very High	Very Low	Very Low	Very Low	Very Low	Very Low	Very Low	Moderate	Very High	Very Low	Very Low	Very High	Very High	0
16940143	GB112069061451	0.247578	0	0	0	0	0	0	0.0112178	0.174157	0	0	Low	Very Low	Very Low	Very Low	Very Low	Very Low	Very Low	Very Low	Very Low	Very Low	Very Low	Low	5.76775	0	0	0	0	0	0	0.538323	5.04678	0	0	Very High	Very Low	Very Low	Very Low	Very Low	Very Low	Very Low	Moderate	Very High	Very Low	Very Low	Very High	Very High	0
16940143	GB112069061452	0.294799	0	0	0	0	0	0	0.0299534	0.260822	0	0	Low	Very Low	Very Low	Very Low	Very Low	Very Low	Very Low	Very Low	Low	Very Low	Very Low	Low	5.76775	0	0	0	0	0	0	0.538323	5.04678	0	0	Very High	Very Low	Very Low	Very Low	Very Low	Very Low	Very Low	Moderate	Very High	Very Low	Very Low	Very High	Very High	0
16940143	GB112071065310	0.0222732	0	0	0	0	0	0	0.00790997	0.00594449	0	0	Very Low	Very Low	Very Low	Very Low	Very Low	Very Low	Very Low	Very Low	Very Low	Very Low	Very Low	Very Low	5.76775	0	0	0	0	0	0	0.538323	5.04678	0	0	Very High	Very Low	Very Low	Very Low	Very Low	Very Low	Very Low	Moderate	Very High	Very Low	Very Low	Very High	Very High	0
16940144	GB112069061090	1	0	0	0	0	0	0	1	1	1	0	Very High	Very Low	Very Low	Very Low	Very Low	Very Low	Very Low	Very High	Very High	Very High	Very Low	Very High	1.46508	0	0	0	0	0	0	0.136741	1.28195	0.104649	0	Very High	Very Low	Very Low	Very Low	Very Low	Very Low	Very Low	Very Low	Very High	Very Low	Very Low	Very High	Very High	0
16940144	GB112069061430	0.523179	0	0	0	0	0	0	0.0978302	0.493049	0.0767985	0	Moderate	Very Low	Very Low	Very Low	Very Low	Very Low	Very Low	Very Low	Moderate	Very Low	Very Low	Moderate	1.46508	0	0	0	0	0	0	0.136741	1.28195	0.104649	0	Very High	Very Low	Very Low	Very Low	Very Low	Very Low	Very Low	Very Low	Very High	Very Low	Very Low	Very High	Very High	0
16940144	GB112069061452	0.000298229	0	0	0	0	0	0	0.000242415	0.000395785	1	0	Very Low	Very Low	Very Low	Very Low	Very Low	Very Low	Very Low	Very Low	Very Low	Very High	Very Low	Very High	1.46508	0	0	0	0	0	0	0.136741	1.28195	0.104649	0	Very High	Very Low	Very Low	Very Low	Very Low	Very Low	Very Low	Very Low	Very High	Very Low	Very Low	Very High	Very High	0
16940148	GB112069060980	0.141987	0	0	0	0	0	0	0.0274876	0.0801704	0	0	Very Low	Very Low	Very Low	Very Low	Very Low	Very Low	Very Low	Very Low	Very Low	Very Low	Very Low	Very Low	1.91268	0	0	0	0	0	0	0.178517	1.67359	0	0	Very High	Very Low	Very Low	Very Low	Very Low	Very Low	Very Low	Very Low	Very High	Very Low	Very Low	Very High	Very High	0
16940148	GB112069061011	0.562943	0	0	0	0	0	0	0.948895	0.530372	0	0	Moderate	Very Low	Very Low	Very Low	Very Low	Very Low	Very Low	Very High	Moderate	Very Low	Very Low	Very High	1.91268	0	0	0	0	0	0	0.178517	1.67359	0	0	Very High	Very Low	Very Low	Very Low	Very Low	Very Low	Very Low	Very Low	Very High	Very Low	Very Low	Very High	Very High	0
16940149	GB112069061030	0.0900375	0	0	0	0	0	0	0.0340136	0.108156	0	0	Very Low	Very Low	Very Low	Very Low	Very Low	Very Low	Very Low	Very Low	Very Low	Very Low	Very Low	Very Low	1.18025	0	0	0	0	0	0	0.110157	1.03272	0	0	Very High	Very Low	Very Low	Very Low	Very Low	Very Low	Very Low	Very Low	Very High	Very Low	Very Low	Very High	Very High	0
16940150	GB112069061430	0.0275943	1	0	0	0	0	0	0.00214996	0.0231157	0	0	Very Low	Very High	Very Low	Very Low	Very Low	Very Low	Very Low	Very Low	Very Low	Very Low	Very Low	Very High	1.96971	0.336292	0	0	0	0	0	0.183839	1.72349	0	0	Very High	Low	Very Low	Very Low	Very Low	Very Low	Very Low	Very Low	Very High	Very Low	Very Low	Very High	Very High	0
16940150	GB112069061451	0.11009	1	0	0	0	0	0	0.0166272	0.103256	0	0	Very Low	Very High	Very Low	Very Low	Very Low	Very Low	Very Low	Very Low	Very Low	Very Low	Very Low	Very High	1.96971	0.336292	0	0	0	0	0	0.183839	1.72349	0	0	Very High	Low	Very Low	Very Low	Very Low	Very Low	Very Low	Very Low	Very High	Very Low	Very Low	Very High	Very High	0
16940150	GB112069061452	0.186931	1	0	0	0	0	0	0.063311	0.220515	0	0	Very Low	Very High	Very Low	Very Low	Very Low	Very Low	Very Low	Very Low	Low	Very Low	Very Low	Very High	1.96971	0.336292	0	0	0	0	0	0.183839	1.72349	0	0	Very High	Low	Very Low	Very Low	Very Low	Very Low	Very Low	Very Low	Very High	Very Low	Very Low	Very High	Very High	0
16940151	GB112069061000	0.493428	0	0	0	0	0	0	0.230776	0.472827	0	0	Moderate	Very Low	Very Low	Very Low	Very Low	Very Low	Very Low	Low	Moderate	Very Low	Very Low	Moderate	2.92859	0	0	0	0	0	0	1.02501	2.56251	0	0	Very High	Very Low	Very Low	Very Low	Very Low	Very Low	Very Low	Very High	Very High	Very Low	Very Low	Very High	Very High	0
16940151	GB112069061030	0.0970057	0	0	0	0	0	0	0.0618401	0.0873946	0	0	Very Low	Very Low	Very Low	Very Low	Very Low	Very Low	Very Low	Very Low	Very Low	Very Low	Very Low	Very Low	2.92859	0	0	0	0	0	0	1.02501	2.56251	0	0	Very High	Very Low	Very Low	Very Low	Very Low	Very Low	Very Low	Very High	Very High	Very Low	Very Low	Very High	Very High	0
16940151	GB112069061050	0.0473928	0	0	0	0	0	0	0.0285491	0.0455725	0	0	Very Low	Very Low	Very Low	Very Low	Very Low	Very Low	Very Low	Very Low	Very Low	Very Low	Very Low	Very Low	2.92859	0	0	0	0	0	0	1.02501	2.56251	0	0	Very High	Very Low	Very Low	Very Low	Very Low	Very Low	Very Low	Very High	Very High	Very Low	Very Low	Very High	Very High	0
16940151	GB112069061112	0.019156	0	0	0	0	0	0	0.0350571	0.0458911	0	0	Very Low	Very Low	Very Low	Very Low	Very Low	Very Low	Very Low	Very Low	Very Low	Very Low	Very Low	Very Low	2.92859	0	0	0	0	0	0	1.02501	2.56251	0	0	Very High	Very Low	Very Low	Very Low	Very Low	Very Low	Very Low	Very High	Very High	Very Low	Very Low	Very High	Very High	0
16940151	GB112071065270	0.737359	0	0	0	0	0	0	0.909546	0.432223	0	0	High	Very Low	Very Low	Very Low	Very Low	Very Low	Very Low	Very High	Moderate	Very Low	Very Low	Very High	2.92859	0	0	0	0	0	0	1.02501	2.56251	0	0	Very High	Very Low	Very Low	Very Low	Very Low	Very Low	Very Low	Very High	Very High	Very Low	Very Low	Very High	Very High	0
16940152	GB112069061030	0.0353729	0	0	0	0	0	0	0.0200443	0.0318682	0	0	Very Low	Very Low	Very Low	Very Low	Very Low	Very Low	Very Low	Very Low	Very Low	Very Low	Very Low	Very Low	0.747985	0	0	0	0	0	0	0.069812	0.654487	0	0	High	Very Low	Very Low	Very Low	Very Low	Very Low	Very Low	Very Low	High	Very Low	Very Low	High	High	0
16940152	GB112069061452	0.00358376	0	0	0	0	0	0	0.00364132	0.00317072	0	0	Very Low	Very Low	Very Low	Very Low	Very Low	Very Low	Very Low	Very Low	Very Low	Very Low	Very Low	Very Low	0.747985	0	0	0	0	0	0	0.069812	0.654487	0	0	High	Very Low	Very Low	Very Low	Very Low	Very Low	Very Low	Very Low	High	Very Low	Very Low	High	High	0
16940154	GB112069061030	0.0135809	0	0	0	0	0	0	0.0128262	0.0122354	0	0	Very Low	Very Low	Very Low	Very Low	Very Low	Very Low	Very Low	Very Low	Very Low	Very Low	Very Low	Very Low	2.11707	0	0	0	0	0	0	0.197593	1.85244	0	0	Very High	Very Low	Very Low	Very Low	Very Low	Very Low	Very Low	Very Low	Very High	Very Low	Very Low	Very High	Very High	0
16940154	GB112069061452	0.0324373	0	0	0	0	0	0	0.0549305	0.0286988	0	0	Very Low	Very Low	Very Low	Very Low	Very Low	Very Low	Very Low	Very Low	Very Low	Very Low	Very Low	Very Low	2.11707	0	0	0	0	0	0	0.197593	1.85244	0	0	Very High	Very Low	Very Low	Very Low	Very Low	Very Low	Very Low	Very Low	Very High	Very Low	Very Low	Very High	Very High	0
16940168	GB112069060860	1	0	0	0	0	0	0	1	1	0	0	Very High	Very Low	Very Low	Very Low	Very Low	Very Low	Very Low	Very High	Very High	Very Low	Very Low	Very High	2.18227	0	0	0	0	0	0	0.203678	1.90949	0	0	Very High	Very Low	Very Low	Very Low	Very Low	Very Low	Very Low	Low	Very High	Very Low	Very Low	Very High	Very High	0
16940168	GB112069060910	0.681836	0	0	0	0	0	0	0.166678	0.652192	0	0	High	Very Low	Very Low	Very Low	Very Low	Very Low	Very Low	Very Low	High	Very Low	Very Low	High	2.18227	0	0	0	0	0	0	0.203678	1.90949	0	0	Very High	Very Low	Very Low	Very Low	Very Low	Very Low	Very Low	Low	Very High	Very Low	Very Low	Very High	Very High	0
16940172	GB112069060700	1	0	0	0	0	0	0	1	1	0	0	Very High	Very Low	Very Low	Very Low	Very Low	Very Low	Very Low	Very High	Very High	Very Low	Very Low	Very High	3.75752	0	0	0	0	0	0	0.350702	3.28783	0	0	Very High	Very Low	Very Low	Very Low	Very Low	Very Low	Very Low	Low	Very High	Very Low	Very Low	Very High	Very High	0
16940172	GB112069060720	1	0	0	0	0	0	0	1	1	0	0	Very High	Very Low	Very Low	Very Low	Very Low	Very Low	Very Low	Very High	Very High	Very Low	Very Low	Very High	3.75752	0	0	0	0	0	0	0.350702	3.28783	0	0	Very High	Very Low	Very Low	Very Low	Very Low	Very Low	Very Low	Low	Very High	Very Low	Very Low	Very High	Very High	0
16940172	GB112069060730	1	0	0	0	0	0	0	1	1	0	0	Very High	Very Low	Very Low	Very Low	Very Low	Very Low	Very Low	Very High	Very High	Very Low	Very Low	Very High	3.75752	0	0	0	0	0	0	0.350702	3.28783	0	0	Very High	Very Low	Very Low	Very Low	Very Low	Very Low	Very Low	Low	Very High	Very Low	Very Low	Very High	Very High	0
16940172	GB112069060780	0.771192	0	0	0	0	0	0	1	0.812482	0	0	High	Very Low	Very Low	Very Low	Very Low	Very Low	Very Low	Very High	Very High	Very Low	Very Low	Very High	3.75752	0	0	0	0	0	0	0.350702	3.28783	0	0	Very High	Very Low	Very Low	Very Low	Very Low	Very Low	Very Low	Low	Very High	Very Low	Very Low	Very High	Very High	0
16940172	GB112069061050	0.596539	0	0	0	0	0	0	0.170359	0.573626	0	0	Moderate	Very Low	Very Low	Very Low	Very Low	Very Low	Very Low	Very Low	Moderate	Very Low	Very Low	Moderate	3.75752	0	0	0	0	0	0	0.350702	3.28783	0	0	Very High	Very Low	Very Low	Very Low	Very Low	Very Low	Very Low	Low	Very High	Very Low	Very Low	Very High	Very High	0
16940172	GB112071065310	2.7e-05	0	0	0	0	0	0	5.11e-05	7.2e-06	0	0	Very Low	Very Low	Very Low	Very Low	Very Low	Very Low	Very Low	Very Low	Very Low	Very Low	Very Low	Very Low	3.75752	0	0	0	0	0	0	0.350702	3.28783	0	0	Very High	Very Low	Very Low	Very Low	Very Low	Very Low	Very Low	Low	Very High	Very Low	Very Low	Very High	Very High	0
16940172	GB112075073660	0.726646	0	0	0	0	0	0	0.37525	0.670773	0	0	High	Very Low	Very Low	Very Low	Very Low	Very Low	Very Low	Low	High	Very Low	Very Low	High	3.75752	0	0	0	0	0	0	0.350702	3.28783	0	0	Very High	Very Low	Very Low	Very Low	Very Low	Very Low	Very Low	Low	Very High	Very Low	Very Low	Very High	Very High	0
16940174	GB112069060970	0.342773	0	0	0	0	0	0	0.145425	0.334878	0.129193	0	Low	Very Low	Very Low	Very Low	Very Low	Very Low	Very Low	Very Low	Low	Very Low	Very Low	Low	2.07705	0	0	0	0	0	0	0.193858	1.81742	0.148361	0	Very High	Very Low	Very Low	Very Low	Very Low	Very Low	Very Low	Very Low	Very High	Very Low	Very Low	Very High	Very High	0
16940175	GB112069060920	0.981451	0	0	0	0	0	0	0.989977	0.932836	0	0	Very High	Very Low	Very Low	Very Low	Very Low	Very Low	Very Low	Very High	Very High	Very Low	Very Low	Very High	1.16036	0	0	0	0	0	0	0.108301	1.01532	0	0	Very High	Very Low	Very Low	Very Low	Very Low	Very Low	Very Low	Very Low	Very High	Very Low	Very Low	Very High	Very High	0
16940175	GB112069060950	1	0	0	0	0	0	0	1	1	0	0	Very High	Very Low	Very Low	Very Low	Very Low	Very Low	Very Low	Very High	Very High	Very Low	Very Low	Very High	1.16036	0	0	0	0	0	0	0.108301	1.01532	0	0	Very High	Very Low	Very Low	Very Low	Very Low	Very Low	Very Low	Very Low	Very High	Very Low	Very Low	Very High	Very High	0
16940175	GB112069061000	0.201586	0	0	0	0	0	0	0.0446965	0.19317	0	0	Low	Very Low	Very Low	Very Low	Very Low	Very Low	Very Low	Very Low	Very Low	Very Low	Very Low	Low	1.16036	0	0	0	0	0	0	0.108301	1.01532	0	0	Very High	Very Low	Very Low	Very Low	Very Low	Very Low	Very Low	Very Low	Very High	Very Low	Very Low	Very High	Very High	0
16940178	GB112069060960	0.199121	0	0	0	0	0	0	0	0.203166	0	0	Very Low	Very Low	Very Low	Very Low	Very Low	Very Low	Very Low	Very Low	Low	Very Low	Very Low	Low	0.767493	0	0	0	0	0	0	0	0.671556	0	0	High	Very Low	Very Low	Very Low	Very Low	Very Low	Very Low	Very Low	High	Very Low	Very Low	High	High	0
16940178	GB112069061050	0.0296095	0	0	0	0	0	0	0	0.0284723	0	0	Very Low	Very Low	Very Low	Very Low	Very Low	Very Low	Very Low	Very Low	Very Low	Very Low	Very Low	Very Low	0.767493	0	0	0	0	0	0	0	0.671556	0	0	High	Very Low	Very Low	Very Low	Very Low	Very Low	Very Low	Very Low	High	Very Low	Very Low	High	High	0
16940182	GB112069060960	0.0662705	0	0	0	0	0	0	0.0578869	0.0540935	0	0	Very Low	Very Low	Very Low	Very Low	Very Low	Very Low	Very Low	Very Low	Very Low	Very Low	Very Low	Very Low	0.853203	0	0	0	0	0	0	0.0796323	0.746553	0	0	Very High	Very Low	Very Low	Very Low	Very Low	Very Low	Very Low	Very Low	High	Very Low	Very Low	Very High	Very High	0
16940183	GB112069060780	0.169241	0	0	0	0	0	0	0	0.133727	0	0	Very Low	Very Low	Very Low	Very Low	Very Low	Very Low	Very Low	Very Low	Very Low	Very Low	Very Low	Very Low	2.84123	0	0	0	0	0	0	0	2.48607	0	0	Very High	Very Low	Very Low	Very Low	Very Low	Very Low	Very Low	Very Low	Very High	Very Low	Very Low	Very High	Very High	0
16940184	GB112069060860	0	0	0	0	0	0	0	0	0	0	0	Very Low	Very Low	Very Low	Very Low	Very Low	Very Low	Very Low	Very Low	Very Low	Very Low	Very Low	Very Low	2.27365	0	0	0	0	0	0	0.212207	1.98944	0	0	Very High	Very Low	Very Low	Very Low	Very Low	Very Low	Very Low	Low	Very High	Very Low	Very Low	Very High	Very High	0
16940184	GB112069060880	0.551823	0	0	0	0	0	0	0.103073	0.518618	0	0	Moderate	Very Low	Very Low	Very Low	Very Low	Very Low	Very Low	Very Low	Moderate	Very Low	Very Low	Moderate	2.27365	0	0	0	0	0	0	0.212207	1.98944	0	0	Very High	Very Low	Very Low	Very Low	Very Low	Very Low	Very Low	Low	Very High	Very Low	Very Low	Very High	Very High	0
16940184	GB112069060960	0.656936	0	0	0	0	0	0	0.215186	0.670283	0	0	High	Very Low	Very Low	Very Low	Very Low	Very Low	Very Low	Low	High	Very Low	Very Low	High	2.27365	0	0	0	0	0	0	0.212207	1.98944	0	0	Very High	Very Low	Very Low	Very Low	Very Low	Very Low	Very Low	Low	Very High	Very Low	Very Low	Very High	Very High	0
16940184	GB112069060970	0.492198	0	0	0	0	0	0	0.10441	0.480861	0	0	Moderate	Very Low	Very Low	Very Low	Very Low	Very Low	Very Low	Very Low	Moderate	Very Low	Very Low	Moderate	2.27365	0	0	0	0	0	0	0.212207	1.98944	0	0	Very High	Very Low	Very Low	Very Low	Very Low	Very Low	Very Low	Low	Very High	Very Low	Very Low	Very High	Very High	0
16940390	GB112069061452	9.98e-06	0	0	0	0	0	0	0	1.01e-05	0	0	Very Low	Very Low	Very Low	Very Low	Very Low	Very Low	Very Low	Very Low	Very Low	Very Low	Very Low	Very Low	0.00126301	0	0	0	0	0	0	0	0.00126301	0	0	Very Low	Very Low	Very Low	Very Low	Very Low	Very Low	Very Low	Very Low	Very Low	Very Low	Very Low	Very Low	Very Low	0
16950031	GB112069064570	0	0	0	0	0	0	0	0	0	0	0	Very Low	Very Low	Very Low	Very Low	Very Low	Very Low	Very Low	Very Low	Very Low	Very Low	Very Low	Very Low	0	0	0	0	0	0	0	0	0	0	0	Very Low	Very Low	Very Low	Very Low	Very Low	Very Low	Very Low	Very Low	Very Low	Very Low	Very Low	Very Low	Very Low	0
16950032	GB112069060840	1	0	0	0	0	0	0	1	1	0	0	Very High	Very Low	Very Low	Very Low	Very Low	Very Low	Very Low	Very High	Very High	Very Low	Very Low	Very High	5.92804	0	0	0	0	0	0	0.553284	5.18704	0	0	Very High	Very Low	Very Low	Very Low	Very Low	Very Low	Very Low	Moderate	Very High	Very Low	Very Low	Very High	Very High	0
16950032	GB112069061451	0.335937	0	0	0	0	0	0	0.0913278	0.354468	0	0	Low	Very Low	Very Low	Very Low	Very Low	Very Low	Very Low	Very Low	Low	Very Low	Very Low	Low	5.92804	0	0	0	0	0	0	0.553284	5.18704	0	0	Very High	Very Low	Very Low	Very Low	Very Low	Very Low	Very Low	Moderate	Very High	Very Low	Very Low	Very High	Very High	0
16950032	GB112069061452	0.00418492	0	0	0	0	0	0	0.00255128	0.00555389	0	0	Very Low	Very Low	Very Low	Very Low	Very Low	Very Low	Very Low	Very Low	Very Low	Very Low	Very Low	Very Low	5.92804	0	0	0	0	0	0	0.553284	5.18704	0	0	Very High	Very Low	Very Low	Very Low	Very Low	Very Low	Very Low	Moderate	Very High	Very Low	Very Low	Very High	Very High	0
16950032	GB112069064530	1	0	0	0	0	0	0	1	1	0	0	Very High	Very Low	Very Low	Very Low	Very Low	Very Low	Very Low	Very High	Very High	Very Low	Very Low	Very High	5.92804	0	0	0	0	0	0	0.553284	5.18704	0	0	Very High	Very Low	Very Low	Very Low	Very Low	Very Low	Very Low	Moderate	Very High	Very Low	Very Low	Very High	Very High	0
16950032	GB112069064540	0.994143	0	0	0	0	0	0	0.99804	0.993497	0	0	Very High	Very Low	Very Low	Very Low	Very Low	Very Low	Very Low	Very High	Very High	Very Low	Very Low	Very High	5.92804	0	0	0	0	0	0	0.553284	5.18704	0	0	Very High	Very Low	Very Low	Very Low	Very Low	Very Low	Very Low	Moderate	Very High	Very Low	Very Low	Very High	Very High	0
16950032	GB112069064550	1	0	0	0	0	0	0	1	1	0	0	Very High	Very Low	Very Low	Very Low	Very Low	Very Low	Very Low	Very High	Very High	Very Low	Very Low	Very High	5.92804	0	0	0	0	0	0	0.553284	5.18704	0	0	Very High	Very Low	Very Low	Very Low	Very Low	Very Low	Very Low	Moderate	Very High	Very Low	Very Low	Very High	Very High	0
16950032	GB112069064560	1	0	0	0	0	0	0	1	1	0	0	Very High	Very Low	Very Low	Very Low	Very Low	Very Low	Very Low	Very High	Very High	Very Low	Very Low	Very High	5.92804	0	0	0	0	0	0	0.553284	5.18704	0	0	Very High	Very Low	Very Low	Very Low	Very Low	Very Low	Very Low	Moderate	Very High	Very Low	Very Low	Very High	Very High	0
16950032	GB112069064570	0.995126	0	0	0	0	0	0	0.91958	0.996283	0	0	Very High	Very Low	Very Low	Very Low	Very Low	Very Low	Very Low	Very High	Very High	Very Low	Very Low	Very High	5.92804	0	0	0	0	0	0	0.553284	5.18704	0	0	Very High	Very Low	Very Low	Very Low	Very Low	Very Low	Very Low	Moderate	Very High	Very Low	Very Low	Very High	Very High	0
16950032	GB112069064580	1	0	0	0	0	0	0	1	1	0	0	Very High	Very Low	Very Low	Very Low	Very Low	Very Low	Very Low	Very High	Very High	Very Low	Very Low	Very High	5.92804	0	0	0	0	0	0	0.553284	5.18704	0	0	Very High	Very Low	Very Low	Very Low	Very Low	Very Low	Very Low	Moderate	Very High	Very Low	Very Low	Very High	Very High	0
16950032	GB112069064620	0.000226355	0	0	0	0	0	0	6.4e-05	0.000191593	0	0	Very Low	Very Low	Very Low	Very Low	Very Low	Very Low	Very Low	Very Low	Very Low	Very Low	Very Low	Very Low	5.92804	0	0	0	0	0	0	0.553284	5.18704	0	0	Very High	Very Low	Very Low	Very Low	Very Low	Very Low	Very Low	Moderate	Very High	Very Low	Very Low	Very High	Very High	0
16950033	GB112069061111	0.000374979	0	0	0	0	0	0	0.000109791	0.00059958	0	0	Very Low	Very Low	Very Low	Very Low	Very Low	Very Low	Very Low	Very Low	Very Low	Very Low	Very Low	Very Low	2.66203	0	0	0	0	0	0	0.248456	2.32927	0	0	Very High	Very Low	Very Low	Very Low	Very Low	Very Low	Very Low	Low	Very High	Very Low	Very Low	Very High	Very High	0
16950033	GB112069061250	1	0	0	0	0	0	0	1	1	0	0	Very High	Very Low	Very Low	Very Low	Very Low	Very Low	Very Low	Very High	Very High	Very Low	Very Low	Very High	2.66203	0	0	0	0	0	0	0.248456	2.32927	0	0	Very High	Very Low	Very Low	Very Low	Very Low	Very Low	Very Low	Low	Very High	Very Low	Very Low	Very High	Very High	0
16950033	GB112069061451	0.00118802	0	0	0	0	0	0	0.000215316	0.00139284	0	0	Very Low	Very Low	Very Low	Very Low	Very Low	Very Low	Very Low	Very Low	Very Low	Very Low	Very Low	Very Low	2.66203	0	0	0	0	0	0	0.248456	2.32927	0	0	Very High	Very Low	Very Low	Very Low	Very Low	Very Low	Very Low	Low	Very High	Very Low	Very Low	Very High	Very High	0
16950033	GB112069064600	0.37382	0	0	0	0	0	0	0.12604	0.363317	0	0	Low	Very Low	Very Low	Very Low	Very Low	Very Low	Very Low	Very Low	Low	Very Low	Very Low	Low	2.66203	0	0	0	0	0	0	0.248456	2.32927	0	0	Very High	Very Low	Very Low	Very Low	Very Low	Very Low	Very Low	Low	Very High	Very Low	Very Low	Very High	Very High	0
16950033	GB112069064610	1	0	0	0	0	0	0	1	1	0	0	Very High	Very Low	Very Low	Very Low	Very Low	Very Low	Very Low	Very High	Very High	Very Low	Very Low	Very High	2.66203	0	0	0	0	0	0	0.248456	2.32927	0	0	Very High	Very Low	Very Low	Very Low	Very Low	Very Low	Very Low	Low	Very High	Very Low	Very Low	Very High	Very High	0
16950033	GB112069064620	0.556555	0	0	0	0	0	0	0.104898	0.523426	0	0	Moderate	Very Low	Very Low	Very Low	Very Low	Very Low	Very Low	Very Low	Moderate	Very Low	Very Low	Moderate	2.66203	0	0	0	0	0	0	0.248456	2.32927	0	0	Very High	Very Low	Very Low	Very Low	Very Low	Very Low	Very Low	Low	Very High	Very Low	Very Low	Very High	Very High	0
16950034	GB112069061161	0.0275988	0	0	0	0	0	0	0	0.0379806	0	0	Very Low	Very Low	Very Low	Very Low	Very Low	Very Low	Very Low	Very Low	Very Low	Very Low	Very Low	Very Low	1.25701	0	0	0	0	0	0	0	1.09988	0	0	Very High	Very Low	Very Low	Very Low	Very Low	Very Low	Very Low	Very Low	Very High	Very Low	Very Low	Very High	Very High	0
16950037	GB112069061451	0.000545739	0	0	0	0	0	0	0	0.000383896	0	0	Very Low	Very Low	Very Low	Very Low	Very Low	Very Low	Very Low	Very Low	Very Low	Very Low	Very Low	Very Low	0.442814	0	0	0	0	0	0	0	0.387462	0	0	Moderate	Very Low	Very Low	Very Low	Very Low	Very Low	Very Low	Very Low	Low	Very Low	Very Low	Moderate	Moderate	0
16950038	GB112069061120	0.300509	0	0	0	0	0	0	0.0857934	0.386623	0.0695117	0	Low	Very Low	Very Low	Very Low	Very Low	Very Low	Very Low	Very Low	Low	Very Low	Very Low	Low	1.29016	0	0	0	0	0	0	0.120415	1.12889	0.0921545	0	Very High	Very Low	Very Low	Very Low	Very Low	Very Low	Very Low	Very Low	Very High	Very Low	Very Low	Very High	Very High	0
16950038	GB112069061151	0.0319018	0	0	0	0	0	0	0.0482447	0.250403	1	0	Very Low	Very Low	Very Low	Very Low	Very Low	Very Low	Very Low	Very Low	Low	Very High	Very Low	Very High	1.29016	0	0	0	0	0	0	0.120415	1.12889	0.0921545	0	Very High	Very Low	Very Low	Very Low	Very Low	Very Low	Very Low	Very Low	Very High	Very Low	Very Low	Very High	Very High	0
16950038	GB112069061152	0.00165168	0	0	0	0	0	0	0.00269077	0.00451764	1	0	Very Low	Very Low	Very Low	Very Low	Very Low	Very Low	Very Low	Very Low	Very Low	Very High	Very Low	Very High	1.29016	0	0	0	0	0	0	0.120415	1.12889	0.0921545	0	Very High	Very Low	Very Low	Very Low	Very Low	Very Low	Very Low	Very Low	Very High	Very Low	Very Low	Very High	Very High	0
16950038	GB112069061161	0.00721287	0	0	0	0	0	0	0.0227169	0.0206794	0.741175	0	Very Low	Very Low	Very Low	Very Low	Very Low	Very Low	Very Low	Very Low	Very Low	High	Very Low	High	1.29016	0	0	0	0	0	0	0.120415	1.12889	0.0921545	0	Very High	Very Low	Very Low	Very Low	Very Low	Very Low	Very Low	Very Low	Very High	Very Low	Very Low	Very High	Very High	0
16950038	GB112069064690	0.0297716	0	0	0	0	0	0	0.0249334	0.0486537	1	0	Very Low	Very Low	Very Low	Very Low	Very Low	Very Low	Very Low	Very Low	Very Low	Very High	Very Low	Very High	1.29016	0	0	0	0	0	0	0.120415	1.12889	0.0921545	0	Very High	Very Low	Very Low	Very Low	Very Low	Very Low	Very Low	Very Low	Very High	Very Low	Very Low	Very High	Very High	0
16950038	GB112071065240	0.014738	0	0	0	0	0	0	0.0171522	0.0107895	1	0	Very Low	Very Low	Very Low	Very Low	Very Low	Very Low	Very Low	Very Low	Very Low	Very High	Very Low	Very High	1.29016	0	0	0	0	0	0	0.120415	1.12889	0.0921545	0	Very High	Very Low	Very Low	Very Low	Very Low	Very Low	Very Low	Very Low	Very High	Very Low	Very Low	Very High	Very High	0
16950041	GB112068060460	0	0	0	0	0	0	0	0	0	0	0	Very Low	Very Low	Very Low	Very Low	Very Low	Very Low	Very Low	Very Low	Very Low	Very Low	Very Low	Very Low	4.07378	0	0	0	0	0	0	0.38022	3.56456	0	0	Very High	Very Low	Very Low	Very Low	Very Low	Very Low	Very Low	Low	Very High	Very Low	Very Low	Very High	Very High	0
16950041	GB112069061112	0.000130288	0	0	0	0	0	0	8.48e-05	0.00052021	0	0	Very Low	Very Low	Very Low	Very Low	Very Low	Very Low	Very Low	Very Low	Very Low	Very Low	Very Low	Very Low	4.07378	0	0	0	0	0	0	0.38022	3.56456	0	0	Very High	Very Low	Very Low	Very Low	Very Low	Very Low	Very Low	Low	Very High	Very Low	Very Low	Very High	Very High	0
16950041	GB112069064600	0.423808	0	0	0	0	0	0	0.142894	0.4119	0	0	Moderate	Very Low	Very Low	Very Low	Very Low	Very Low	Very Low	Very Low	Moderate	Very Low	Very Low	Moderate	4.07378	0	0	0	0	0	0	0.38022	3.56456	0	0	Very High	Very Low	Very Low	Very Low	Very Low	Very Low	Very Low	Low	Very High	Very Low	Very Low	Very High	Very High	0
16950041	GB112069064690	0.970228	0	0	0	0	0	0	0.975067	0.951346	0	0	Very High	Very Low	Very Low	Very Low	Very Low	Very Low	Very Low	Very High	Very High	Very Low	Very Low	Very High	4.07378	0	0	0	0	0	0	0.38022	3.56456	0	0	Very High	Very Low	Very Low	Very Low	Very Low	Very Low	Very Low	Low	Very High	Very Low	Very Low	Very High	Very High	0
16950041	GB112069064710	1	0	0	0	0	0	0	1	1	0	0	Very High	Very Low	Very Low	Very Low	Very Low	Very Low	Very Low	Very High	Very High	Very Low	Very Low	Very High	4.07378	0	0	0	0	0	0	0.38022	3.56456	0	0	Very High	Very Low	Very Low	Very Low	Very Low	Very Low	Very Low	Low	Very High	Very Low	Very Low	Very High	Very High	0
16950041	GB112069064720	0.999889	0	0	0	0	0	0	1	0.999933	0	0	Very High	Very Low	Very Low	Very Low	Very Low	Very Low	Very Low	Very High	Very High	Very Low	Very Low	Very High	4.07378	0	0	0	0	0	0	0.38022	3.56456	0	0	Very High	Very Low	Very Low	Very Low	Very Low	Very Low	Very Low	Low	Very High	Very Low	Very Low	Very High	Very High	0
16950041	GB112069064730	1	0	0	0	0	0	0	1	1	0	0	Very High	Very Low	Very Low	Very Low	Very Low	Very Low	Very Low	Very High	Very High	Very Low	Very Low	Very High	4.07378	0	0	0	0	0	0	0.38022	3.56456	0	0	Very High	Very Low	Very Low	Very Low	Very Low	Very Low	Very Low	Low	Very High	Very Low	Very Low	Very High	Very High	0
16950042	GB112069064641	0.595774	0	0	0	0	0	0	0.120926	0.563248	0	0	Moderate	Very Low	Very Low	Very Low	Very Low	Very Low	Very Low	Very Low	Moderate	Very Low	Very Low	Moderate	5.47283	0	0	0	0	0	0	0.510797	4.78872	0	0	Very High	Very Low	Very Low	Very Low	Very Low	Very Low	Very Low	Moderate	Very High	Very Low	Very Low	Very High	Very High	0
16950042	GB112069064650	1	0	0	0	0	0	0	1	1	0	0	Very High	Very Low	Very Low	Very Low	Very Low	Very Low	Very Low	Very High	Very High	Very Low	Very Low	Very High	5.47283	0	0	0	0	0	0	0.510797	4.78872	0	0	Very High	Very Low	Very Low	Very Low	Very Low	Very Low	Very Low	Moderate	Very High	Very Low	Very Low	Very High	Very High	0
16950042	GB112069064660	1	0	0	0	0	0	0	1	1	0	0	Very High	Very Low	Very Low	Very Low	Very Low	Very Low	Very Low	Very High	Very High	Very Low	Very Low	Very High	5.47283	0	0	0	0	0	0	0.510797	4.78872	0	0	Very High	Very Low	Very Low	Very Low	Very Low	Very Low	Very Low	Moderate	Very High	Very Low	Very Low	Very High	Very High	0
16950042	GB112069064670	1	0	0	0	0	0	0	1	1	0	0	Very High	Very Low	Very Low	Very Low	Very Low	Very Low	Very Low	Very High	Very High	Very Low	Very Low	Very High	5.47283	0	0	0	0	0	0	0.510797	4.78872	0	0	Very High	Very Low	Very Low	Very Low	Very Low	Very Low	Very Low	Moderate	Very High	Very Low	Very Low	Very High	Very High	0
16950042	GB112069064680	1	0	0	0	0	0	0	1	1	0	0	Very High	Very Low	Very Low	Very Low	Very Low	Very Low	Very Low	Very High	Very High	Very Low	Very Low	Very High	5.47283	0	0	0	0	0	0	0.510797	4.78872	0	0	Very High	Very Low	Very Low	Very Low	Very Low	Very Low	Very Low	Moderate	Very High	Very Low	Very Low	Very High	Very High	0
16950136	GB112069060820	0.419151	0	0	0	0	0	0	0.118739	0.376229	0	0	Moderate	Very Low	Very Low	Very Low	Very Low	Very Low	Very Low	Very Low	Low	Very Low	Very Low	Moderate	1.57157	0	0	0	0	0	0	0.14668	1.37512	0	0	Very High	Very Low	Very Low	Very Low	Very Low	Very Low	Very Low	Very Low	Very High	Very Low	Very Low	Very High	Very High	0
16983012	GB112069061390	0.270887	0	0	0	0	0	0	0.0726361	0.178626	0	0	Low	Very Low	Very Low	Very Low	Very Low	Very Low	Very Low	Very Low	Very Low	Very Low	Very Low	Low	2.69539	0	0	0	0	0	0	0.25157	2.35847	0	0	Very High	Very Low	Very Low	Very Low	Very Low	Very Low	Very Low	Low	Very High	Very Low	Very Low	Very High	Very High	0
16983012	GB531206908100	0.0107903	0	0	0	0	0	0	0.129931	0.0149428	0	0	Very Low	Very Low	Very Low	Very Low	Very Low	Very Low	Very Low	Very Low	Very Low	Very Low	Very Low	Very Low	2.69539	0	0	0	0	0	0	0.25157	2.35847	0	0	Very High	Very Low	Very Low	Very Low	Very Low	Very Low	Very Low	Low	Very High	Very Low	Very Low	Very High	Very High	0
16983122	GB112068055360	0.115826	0	0	0	0	1	0	0.0422823	0.0735917	0	1	Very Low	Very Low	Very Low	Very Low	Very Low	Very High	Very Low	Very Low	Very Low	Very Low	Very High	Very High	5.69853	0	0	0	0	0.848717	0	0.531863	4.98621	0	0.687753	Very High	Very Low	Very Low	Very Low	Very Low	Very High	Very Low	Moderate	Very High	Very Low	High	Very High	Very High	0
16983122	GB112069060990	1	0	0	0	0	1	0	1	1	0	1	Very High	Very Low	Very Low	Very Low	Very Low	Very High	Very Low	Very High	Very High	Very Low	Very High	Very High	5.69853	0	0	0	0	0.848717	0	0.531863	4.98621	0	0.687753	Very High	Very Low	Very Low	Very Low	Very Low	Very High	Very Low	Moderate	Very High	Very Low	High	Very High	Very High	0
16983122	GB112069061012	1	0	0	0	0	1	0	1	1	0	1	Very High	Very Low	Very Low	Very Low	Very Low	Very High	Very Low	Very High	Very High	Very Low	Very High	Very High	5.69853	0	0	0	0	0.848717	0	0.531863	4.98621	0	0.687753	Very High	Very Low	Very Low	Very Low	Very Low	Very High	Very Low	Moderate	Very High	Very Low	High	Very High	Very High	0
16983122	GB112069061020	1	0	0	0	0	1	0	1	1	0	1	Very High	Very Low	Very Low	Very Low	Very Low	Very High	Very Low	Very High	Very High	Very Low	Very High	Very High	5.69853	0	0	0	0	0.848717	0	0.531863	4.98621	0	0.687753	Very High	Very Low	Very Low	Very Low	Very Low	Very High	Very Low	Moderate	Very High	Very Low	High	Very High	Very High	0
16983122	GB112069061170	0.00496821	0	0	0	0	1	0	0.0013297	0.00239092	0	0.00760772	Very Low	Very Low	Very Low	Very Low	Very Low	Very High	Very Low	Very Low	Very Low	Very Low	Very Low	Very High	5.69853	0	0	0	0	0.848717	0	0.531863	4.98621	0	0.687753	Very High	Very Low	Very Low	Very Low	Very Low	Very High	Very Low	Moderate	Very High	Very Low	High	Very High	Very High	0
16983122	GB112069061200	0.557644	0	0	0	0	1	0	0.0500841	0.359289	0	0.277794	Moderate	Very Low	Very Low	Very Low	Very Low	Very High	Very Low	Very Low	Low	Very Low	Low	Very High	5.69853	0	0	0	0	0.848717	0	0.531863	4.98621	0	0.687753	Very High	Very Low	Very Low	Very Low	Very Low	Very High	Very Low	Moderate	Very High	Very Low	High	Very High	Very High	0
16983122	GB112069061220	1	0	0	0	0	1	0	1	1	0	1	Very High	Very Low	Very Low	Very Low	Very Low	Very High	Very Low	Very High	Very High	Very Low	Very High	Very High	5.69853	0	0	0	0	0.848717	0	0.531863	4.98621	0	0.687753	Very High	Very Low	Very Low	Very Low	Very Low	Very High	Very Low	Moderate	Very High	Very Low	High	Very High	Very High	0
16983122	GB112069061230	0	0	0	0	0	0	0	0	0	0	0	Very Low	Very Low	Very Low	Very Low	Very Low	Very Low	Very Low	Very Low	Very Low	Very Low	Very Low	Very Low	5.69853	0	0	0	0	0.848717	0	0.531863	4.98621	0	0.687753	Very High	Very Low	Very Low	Very Low	Very Low	Very High	Very Low	Moderate	Very High	Very Low	High	Very High	Very High	0
16983122	GB112069064520	0	0	0	0	0	0	0	0	0	0	0	Very Low	Very Low	Very Low	Very Low	Very Low	Very Low	Very Low	Very Low	Very Low	Very Low	Very Low	Very Low	5.69853	0	0	0	0	0.848717	0	0.531863	4.98621	0	0.687753	Very High	Very Low	Very Low	Very Low	Very Low	Very High	Very Low	Moderate	Very High	Very Low	High	Very High	Very High	0
16983122	GB112070061610	0.0180773	0	0	0	0	1	0	0.0091211	0.0091211	0	1	Very Low	Very Low	Very Low	Very Low	Very Low	Very High	Very Low	Very Low	Very Low	Very Low	Very High	Very High	5.69853	0	0	0	0	0.848717	0	0.531863	4.98621	0	0.687753	Very High	Very Low	Very Low	Very Low	Very Low	Very High	Very Low	Moderate	Very High	Very Low	High	Very High	Very High	0
16983122	GB531206908100	0.0086548	0	0	0	0	0.0349489	0	0.031265	0.0119855	0	0.0183708	Very Low	Very Low	Very Low	Very Low	Very Low	Very Low	Very Low	Very Low	Very Low	Very Low	Very Low	Very Low	5.69853	0	0	0	0	0.848717	0	0.531863	4.98621	0	0.687753	Very High	Very Low	Very Low	Very Low	Very Low	Very High	Very Low	Moderate	Very High	Very Low	High	Very High	Very High	0
16983122	GB71210004	0.00962585	0	0	0	0	1	0	0.0414422	0.0126958	0	1	Very Low	Very Low	Very Low	Very Low	Very Low	Very High	Very Low	Very Low	Very Low	Very Low	Very High	Very High	5.69853	0	0	0	0	0.848717	0	0.531863	4.98621	0	0.687753	Very High	Very Low	Very Low	Very Low	Very Low	Very High	Very Low	Moderate	Very High	Very Low	High	Very High	Very High	0
16983122	GB71210055	1	0	0	0	0	1	0	1	1	0	1	Very High	Very Low	Very Low	Very Low	Very Low	Very High	Very Low	Very High	Very High	Very Low	Very High	Very High	5.69853	0	0	0	0	0.848717	0	0.531863	4.98621	0	0.687753	Very High	Very Low	Very Low	Very Low	Very Low	Very High	Very Low	Moderate	Very High	Very Low	High	Very High	Very High	0
16983268	GB112069061152	0.00624999	0	0	0	0	0.0257914	0	0.00814556	0.0123083	0	0	Very Low	Very Low	Very Low	Very Low	Very Low	Very Low	Very Low	Very Low	Very Low	Very Low	Very Low	Very Low	0.177755	0	0	0	0	0.0264742	0	0.0165905	0.155536	0	0	Very Low	Very Low	Very Low	Very Low	Very Low	Very Low	Very Low	Very Low	Very Low	Very Low	Very Low	Very Low	Very Low	0
16993397	GB112069061390	0.0953193	1	0	1	0	1	0	0	0.0419032	0	1	Very Low	Very High	Very Low	Very High	Very Low	Very High	Very Low	Very Low	Very Low	Very Low	Very High	Very High	2.07114	0.353609	0	0.381526	0	0.308468	0	0	1.81225	0	0.249965	Very High	Low	Very Low	Low	Very Low	Low	Very Low	Very Low	Very High	Very Low	Low	Very High	Very High	0
16993397	GB112070064820	0.0191566	1	0	0.00130138	0	1	0	0	0.00637952	0	1	Very Low	Very High	Very Low	Very Low	Very Low	Very High	Very Low	Very Low	Very Low	Very Low	Very High	Very High	2.07114	0.353609	0	0.381526	0	0.308468	0	0	1.81225	0	0.249965	Very High	Low	Very Low	Low	Very Low	Low	Very Low	Very Low	Very High	Very Low	Low	Very High	Very High	0
16993397	GB531206908100	0.318612	0.154046	0	0.16421	0	0.102927	0	0	0.29415	0	0.0961045	Low	Very Low	Very Low	Very Low	Very Low	Very Low	Very Low	Very Low	Low	Very Low	Very Low	Low	2.07114	0.353609	0	0.381526	0	0.308468	0	0	1.81225	0	0.249965	Very High	Low	Very Low	Low	Very Low	Low	Very Low	Very Low	Very High	Very Low	Low	Very High	Very High	0
16993397	GB531206908300	1	1	0	1	0	1	0	0	1	0	1	Very High	Very High	Very Low	Very High	Very Low	Very High	Very Low	Very Low	Very High	Very Low	Very High	Very High	2.07114	0.353609	0	0.381526	0	0.308468	0	0	1.81225	0	0.249965	Very High	Low	Very Low	Low	Very Low	Low	Very Low	Very Low	Very High	Very Low	Low	Very High	Very High	0
16993397	GB641211630001	0.928461	1	0	1	0	1	0	0	0.916628	0	1	Very High	Very High	Very Low	Very High	Very Low	Very High	Very Low	Very Low	Very High	Very Low	Very High	Very High	2.07114	0.353609	0	0.381526	0	0.308468	0	0	1.81225	0	0.249965	Very High	Low	Very Low	Low	Very Low	Low	Very Low	Very Low	Very High	Very Low	Low	Very High	Very High	13
16993398	GB112068060270	0.994852	0	0	0	0	0	0	0	0.987228	0	0	Very High	Very Low	Very Low	Very Low	Very Low	Very Low	Very Low	Very Low	Very High	Very Low	Very Low	Very High	4.48526	0	0	0	0	0	0	0	3.9246	0	0	Very High	Very Low	Very Low	Very Low	Very Low	Very Low	Very Low	Very Low	Very High	Very Low	Very Low	Very High	Very High	0
16993398	GB531206908100	0.10482	0	0	0	0	0	0	0	0.0967725	0	0	Very Low	Very Low	Very Low	Very Low	Very Low	Very Low	Very Low	Very Low	Very Low	Very Low	Very Low	Very Low	4.48526	0	0	0	0	0	0	0	3.9246	0	0	Very High	Very Low	Very Low	Very Low	Very Low	Very Low	Very Low	Very Low	Very High	Very Low	Very Low	Very High	Very High	0
16993398	GB71210004	0.729871	0	0	0	0	0	0	0	0.641762	0	0	High	Very Low	Very Low	Very Low	Very Low	Very Low	Very Low	Very Low	High	Very Low	Very Low	High	4.48526	0	0	0	0	0	0	0	3.9246	0	0	Very High	Very Low	Very Low	Very Low	Very Low	Very Low	Very Low	Very Low	Very High	Very Low	Very Low	Very High	Very High	0
16993399	GB112068060530	0.864761	0	0	0	0	0	0	0	0.80999	0	0	Very High	Very Low	Very Low	Very Low	Very Low	Very Low	Very Low	Very Low	Very High	Very Low	Very Low	Very High	3.04112	0	0	0	0	0	0	0	2.66098	0	0	Very High	Very Low	Very Low	Very Low	Very Low	Very Low	Very Low	Very Low	Very High	Very Low	Very Low	Very High	Very High	0
16993399	GB112071065490	0.00712937	0	0	0	0	0	0	0	0.0170384	0	0	Very Low	Very Low	Very Low	Very Low	Very Low	Very Low	Very Low	Very Low	Very Low	Very Low	Very Low	Very Low	3.04112	0	0	0	0	0	0	0	2.66098	0	0	Very High	Very Low	Very Low	Very Low	Very Low	Very Low	Very Low	Very Low	Very High	Very Low	Very Low	Very High	Very High	0
16993399	GB531206908100	0.136338	0	0	0	0	0	0	0	0.125871	0	0	Very Low	Very Low	Very Low	Very Low	Very Low	Very Low	Very Low	Very Low	Very Low	Very Low	Very Low	Very Low	3.04112	0	0	0	0	0	0	0	2.66098	0	0	Very High	Very Low	Very Low	Very Low	Very Low	Very Low	Very Low	Very Low	Very High	Very Low	Very Low	Very High	Very High	0
16993399	GB641211630001	0.0150232	0	0	0	0	0	0	0	0.0148317	0	0	Very Low	Very Low	Very Low	Very Low	Very Low	Very Low	Very Low	Very Low	Very Low	Very Low	Very Low	Very Low	3.04112	0	0	0	0	0	0	0	2.66098	0	0	Very High	Very Low	Very Low	Very Low	Very Low	Very Low	Very Low	Very Low	Very High	Very Low	Very Low	Very High	Very High	13
16993400	GB112068060530	0.135239	0	0	0	0	0	0	0	0.19001	0	0	Very Low	Very Low	Very Low	Very Low	Very Low	Very Low	Very Low	Very Low	Very Low	Very Low	Very Low	Very Low	5.07942	0	0	0	0	0	0	0	4.4445	0	0	Very High	Very Low	Very Low	Very Low	Very Low	Very Low	Very Low	Very Low	Very High	Very Low	Very Low	Very High	Very High	0
16993400	GB112069064720	0.000111385	0	0	0	0	0	0	0	6.68e-05	0	0	Very Low	Very Low	Very Low	Very Low	Very Low	Very Low	Very Low	Very Low	Very Low	Very Low	Very Low	Very Low	5.07942	0	0	0	0	0	0	0	4.4445	0	0	Very High	Very Low	Very Low	Very Low	Very Low	Very Low	Very Low	Very Low	Very High	Very Low	Very Low	Very High	Very High	0
16993400	GB641211630001	0.00463482	0	0	0	0	0	0	0	0.00686363	0	0	Very Low	Very Low	Very Low	Very Low	Very Low	Very Low	Very Low	Very Low	Very Low	Very Low	Very Low	Very Low	5.07942	0	0	0	0	0	0	0	4.4445	0	0	Very High	Very Low	Very Low	Very Low	Very Low	Very Low	Very Low	Very Low	Very High	Very Low	Very Low	Very High	Very High	13
17020107	GB112070064790	1	0	0	0	0	0	0	1	1	0	0	Very High	Very Low	Very Low	Very Low	Very Low	Very Low	Very Low	Very High	Very High	Very Low	Very Low	Very High	0.401833	0	0	0	0	0	0	0.0375044	0.351604	0	0	Moderate	Very Low	Very Low	Very Low	Very Low	Very Low	Very Low	Very Low	Low	Very Low	Very Low	Moderate	Very High	0
17020107	GB112070064820	0.00573537	0	0	0	0	0	0	0.00157256	0.00397915	0	0	Very Low	Very Low	Very Low	Very Low	Very Low	Very Low	Very Low	Very Low	Very Low	Very Low	Very Low	Very Low	0.401833	0	0	0	0	0	0	0.0375044	0.351604	0	0	Moderate	Very Low	Very Low	Very Low	Very Low	Very Low	Very Low	Very Low	Low	Very Low	Very Low	Moderate	Moderate	0
17020107	GB112070064830	0.0443204	0	0	0	0	0	0	1	0.0605131	0	0	Very Low	Very Low	Very Low	Very Low	Very Low	Very Low	Very Low	Very High	Very Low	Very Low	Very Low	Very High	0.401833	0	0	0	0	0	0	0.0375044	0.351604	0	0	Moderate	Very Low	Very Low	Very Low	Very Low	Very Low	Very Low	Very Low	Low	Very Low	Very Low	Moderate	Very High	0
17030001	GB112070064810	0.0688878	0	0	1	0	0	0	0.0126042	0.0646428	1	0	Very Low	Very Low	Very Low	Very High	Very Low	Very Low	Very Low	Very Low	Very Low	Very High	Very Low	Very High	0.27819	0	0	0.0512455	0	0	0	0.0259644	0.243416	0.0198707	0	Low	Very Low	Very Low	Very Low	Very Low	Very Low	Very Low	Very Low	Low	Very Low	Very Low	Low	Very High	0
17030001	GB112070064880	0.171625	0	0	0.047211	0	0	0	0.0210503	0.15529	0.0188512	0	Very Low	Very Low	Very Low	Very Low	Very Low	Very Low	Very Low	Very Low	Very Low	Very Low	Very Low	Very Low	0.27819	0	0	0.0512455	0	0	0	0.0259644	0.243416	0.0198707	0	Low	Very Low	Very Low	Very Low	Very Low	Very Low	Very Low	Very Low	Low	Very Low	Very Low	Low	Low	0
17030002	GB112070064880	0.0920263	0	0	0	0	0	0	0.0112873	0.0832672	0	0	Very Low	Very Low	Very Low	Very Low	Very Low	Very Low	Very Low	Very Low	Very Low	Very Low	Very Low	Very Low	0.941132	0	0	0	0	0	0	0.087839	0.82349	0	0	Very High	Very Low	Very Low	Very Low	Very Low	Very Low	Very Low	Very Low	Very High	Very Low	Very Low	Very High	Very High	0
17030002	GB71210083	1	0	0	0	0	0	0	1	1	0	0	Very High	Very Low	Very Low	Very Low	Very Low	Very Low	Very Low	Very High	Very High	Very Low	Very Low	Very High	0.941132	0	0	0	0	0	0	0.087839	0.82349	0	0	Very High	Very Low	Very Low	Very Low	Very Low	Very Low	Very Low	Very Low	Very High	Very Low	Very Low	Very High	Very High	0
17030014	GB112070064810	0.47143	0	0	0	0	0	0	0.086256	0.44238	0	0	Moderate	Very Low	Very Low	Very Low	Very Low	Very Low	Very Low	Very Low	Moderate	Very Low	Very Low	Moderate	1.02556	0	0	0	0	0	0	0.0957188	0.897363	0	0	Very High	Very Low	Very Low	Very Low	Very Low	Very Low	Very Low	Very Low	Very High	Very Low	Very Low	Very High	Very High	0
17030023	GB531207112400	0.000815357	0	0	0	0	0	0	0	0.000758384	0	0	Very Low	Very Low	Very Low	Very Low	Very Low	Very Low	Very Low	Very Low	Very Low	Very Low	Very Low	Very Low	0.102822	0	0	0	0	0	0	0	0.0899696	0	0	Very Low	Very Low	Very Low	Very Low	Very Low	Very Low	Very Low	Very Low	Very Low	Very Low	Very Low	Very Low	Very Low	0
17030100	GB112070064830	0.95568	0	0	0	0	0	0	0	0.939487	0	0	Very High	Very Low	Very Low	Very Low	Very Low	Very Low	Very Low	Very Low	Very High	Very Low	Very Low	Very High	0.106128	0	0	0	0	0	0	0	0.0928621	0	0	Very Low	Very Low	Very Low	Very Low	Very Low	Very Low	Very Low	Very Low	Very Low	Very Low	Very Low	Very Low	Very High	0
17030100	GB531207112400	0.00350821	0	0	0	0	0	0	0	0.00326307	0	0	Very Low	Very Low	Very Low	Very Low	Very Low	Very Low	Very Low	Very Low	Very Low	Very Low	Very Low	Very Low	0.106128	0	0	0	0	0	0	0	0.0928621	0	0	Very Low	Very Low	Very Low	Very Low	Very Low	Very Low	Very Low	Very Low	Very Low	Very Low	Very Low	Very Low	Very Low	0
17030100	GB641211630001	0.000427669	0	0	0	0	0	0	0	0.000633328	0	0	Very Low	Very Low	Very Low	Very Low	Very Low	Very Low	Very Low	Very Low	Very Low	Very Low	Very Low	Very Low	0.106128	0	0	0	0	0	0	0	0.0928621	0	0	Very Low	Very Low	Very Low	Very Low	Very Low	Very Low	Very Low	Very Low	Very Low	Very Low	Very Low	Very Low	Very Low	13
17050012	GB112069064540	0.00585686	0	0	0	0	0	0	0.00195994	0.00650339	0	0	Very Low	Very Low	Very Low	Very Low	Very Low	Very Low	Very Low	Very Low	Very Low	Very Low	Very Low	Very Low	0.478658	0	0	0	0	0	0	0.0446748	0.418826	0	0	Moderate	Very Low	Very Low	Very Low	Very Low	Very Low	Very Low	Very Low	Moderate	Very Low	Very Low	Moderate	Moderate	0
17050012	GB112070064850	0.115438	0	0	0	0	0	0	0.026545	0.0994509	0	0	Very Low	Very Low	Very Low	Very Low	Very Low	Very Low	Very Low	Very Low	Very Low	Very Low	Very Low	Very Low	0.478658	0	0	0	0	0	0	0.0446748	0.418826	0	0	Moderate	Very Low	Very Low	Very Low	Very Low	Very Low	Very Low	Very Low	Moderate	Very Low	Very Low	Moderate	Moderate	0
17060016	GB112070064861	0.35541	0	0	0	0	0	0	0.00254196	0.0920311	0	0	Low	Very Low	Very Low	Very Low	Very Low	Very Low	Very Low	Very Low	Very Low	Very Low	Very Low	Low	3.22973	0	0	0	0	0	0	0.0606798	0.500608	0	0	Very High	Very Low	Very Low	Very Low	Very Low	Very Low	Very Low	Very Low	Moderate	Very Low	Very Low	Very High	Very High	0
17060016	GB112070064951	0.847243	0	0	0	0	0	0	0.342546	0.222734	0	0	Very High	Very Low	Very Low	Very Low	Very Low	Very Low	Very Low	Low	Low	Very Low	Very Low	Very High	3.22973	0	0	0	0	0	0	0.0606798	0.500608	0	0	Very High	Very Low	Very Low	Very Low	Very Low	Very Low	Very Low	Very Low	Moderate	Very Low	Very Low	Very High	Very High	0
17060016	GB112070064952	0.594893	0	0	0	0	0	0	0.0299905	0.196555	0	0	Moderate	Very Low	Very Low	Very Low	Very Low	Very Low	Very Low	Very Low	Very Low	Very Low	Very Low	Moderate	3.22973	0	0	0	0	0	0	0.0606798	0.500608	0	0	Very High	Very Low	Very Low	Very Low	Very Low	Very Low	Very Low	Very Low	Moderate	Very Low	Very Low	Very High	Very High	0
17060017	GB112070064820	0.00105102	0	0	0	0	0	0	0.000576353	0.000525017	0	0	Very Low	Very Low	Very Low	Very Low	Very Low	Very Low	Very Low	Very Low	Very Low	Very Low	Very Low	Very Low	2.71051	0	0	0	0	0	0	0.252981	2.3717	0	0	Very High	Very Low	Very Low	Very Low	Very Low	Very Low	Very Low	Low	Very High	Very Low	Very Low	Very High	Very High	0
17060017	GB112070064861	0.325622	0	0	0	0	0	0	0.0867709	0.428388	0	0	Low	Very Low	Very Low	Very Low	Very Low	Very Low	Very Low	Very Low	Moderate	Very Low	Very Low	Moderate	2.71051	0	0	0	0	0	0	0.252981	2.3717	0	0	Very High	Very Low	Very Low	Very Low	Very Low	Very Low	Very Low	Low	Very High	Very Low	Very Low	Very High	Very High	0
17060017	GB112070064912	0.00618434	0	0	0	0	0	0	0.00672591	0.0134917	0	0	Very Low	Very Low	Very Low	Very Low	Very Low	Very Low	Very Low	Very Low	Very Low	Very Low	Very Low	Very Low	2.71051	0	0	0	0	0	0	0.252981	2.3717	0	0	Very High	Very Low	Very Low	Very Low	Very Low	Very Low	Very Low	Low	Very High	Very Low	Very Low	Very High	Very High	0
17060017	GB112070064920	1	0	0	0	0	0	0	1	1	0	0	Very High	Very Low	Very Low	Very Low	Very Low	Very Low	Very Low	Very High	Very High	Very Low	Very Low	Very High	2.71051	0	0	0	0	0	0	0.252981	2.3717	0	0	Very High	Very Low	Very Low	Very Low	Very Low	Very Low	Very Low	Low	Very High	Very Low	Very Low	Very High	Very High	0
17060017	GB112070064952	0.134048	0	0	0	0	0	0	0.251782	0.225021	0	0	Very Low	Very Low	Very Low	Very Low	Very Low	Very Low	Very Low	Low	Low	Very Low	Very Low	Low	2.71051	0	0	0	0	0	0	0.252981	2.3717	0	0	Very High	Very Low	Very Low	Very Low	Very Low	Very Low	Very Low	Low	Very High	Very Low	Very Low	Very High	Very High	0
17060018	GB112070064820	0.00979819	0	0	0	0	0	0	0.000540796	0.0012042	0	0	Very Low	Very Low	Very Low	Very Low	Very Low	Very Low	Very Low	Very Low	Very Low	Very Low	Very Low	Very Low	5.79233	0	0	0	0	0	0	0.108826	0.897811	0	0	Very High	Very Low	Very Low	Very Low	Very Low	Very Low	Very Low	Very Low	Very High	Very Low	Very Low	Very High	Very High	0
17060018	GB112070064911	0.0393656	0	0	0	0	0	0	0.0114259	0.00305985	0	0	Very Low	Very Low	Very Low	Very Low	Very Low	Very Low	Very Low	Very Low	Very Low	Very Low	Very Low	Very Low	5.79233	0	0	0	0	0	0	0.108826	0.897811	0	0	Very High	Very Low	Very Low	Very Low	Very Low	Very Low	Very Low	Very Low	Very High	Very Low	Very Low	Very High	Very High	0
17060018	GB112070064912	0.83885	0	0	0	0	0	0	0.0918234	0.450244	0	0	Very High	Very Low	Very Low	Very Low	Very Low	Very Low	Very Low	Very Low	Moderate	Very Low	Very Low	Very High	5.79233	0	0	0	0	0	0	0.108826	0.897811	0	0	Very High	Very Low	Very Low	Very Low	Very Low	Very Low	Very Low	Very Low	Very High	Very Low	Very Low	Very High	Very High	0
17060019	GB112070064900	0.64105	0	0	0	0	0	0	0.14287	0.609781	0	0	High	Very Low	Very Low	Very Low	Very Low	Very Low	Very Low	Very Low	High	Very Low	Very Low	High	2.06667	0	0	0	0	0	0	0.19289	1.80834	0	0	Very High	Very Low	Very Low	Very Low	Very Low	Very Low	Very Low	Very Low	Very High	Very Low	Very Low	Very High	Very High	0
17060019	GB531207112400	0.00103405	0	0	0	0	0	0	0.000245491	0.0017811	0	0	Very Low	Very Low	Very Low	Very Low	Very Low	Very Low	Very Low	Very Low	Very Low	Very Low	Very Low	Very Low	2.06667	0	0	0	0	0	0	0.19289	1.80834	0	0	Very High	Very Low	Very Low	Very Low	Very Low	Very Low	Very Low	Very Low	Very High	Very Low	Very Low	Very High	Very High	0
17081316	GB112068055360	0.542038	0	0	0.321984	0	0	0	0.395741	0.688781	0	0	Moderate	Very Low	Very Low	Low	Very Low	Very Low	Very Low	Low	High	Very Low	Very Low	High	7.32387	0	0	1.34913	0	0	0	0.683561	6.40838	0	0	Very High	Very Low	Very Low	Very High	Very Low	Very Low	Very Low	High	Very High	Very Low	Very Low	Very High	Very High	0
17081316	GB112069060820	0.051056	0	0	1	0	0	0	0.00964225	0.0549934	0	0	Very Low	Very Low	Very Low	Very High	Very Low	Very Low	Very Low	Very Low	Very Low	Very Low	Very Low	Very High	7.32387	0	0	1.34913	0	0	0	0.683561	6.40838	0	0	Very High	Very Low	Very Low	Very High	Very Low	Very Low	Very Low	High	Very High	Very Low	Very Low	Very High	Very High	0
17081316	GB112069061030	0.016684	0	0	1	0	0	0	0.00378164	0.0300619	0	0	Very Low	Very Low	Very Low	Very High	Very Low	Very Low	Very Low	Very Low	Very Low	Very Low	Very Low	Very High	7.32387	0	0	1.34913	0	0	0	0.683561	6.40838	0	0	Very High	Very Low	Very Low	Very High	Very Low	Very Low	Very Low	High	Very High	Very Low	Very Low	Very High	Very High	0
17081316	GB112069061060	0.000157518	0	0	1	0	0	0	0.000629776	0.000314987	0	0	Very Low	Very Low	Very Low	Very High	Very Low	Very Low	Very Low	Very Low	Very Low	Very Low	Very Low	Very High	7.32387	0	0	1.34913	0	0	0	0.683561	6.40838	0	0	Very High	Very Low	Very Low	Very High	Very Low	Very Low	Very Low	High	Very High	Very Low	Very Low	Very High	Very High	0
17081316	GB112069064520	0.997121	0	0	1	0	0	0	0.992135	0.996431	0	0	Very High	Very Low	Very Low	Very High	Very Low	Very Low	Very Low	Very High	Very High	Very Low	Very Low	Very High	7.32387	0	0	1.34913	0	0	0	0.683561	6.40838	0	0	Very High	Very Low	Very Low	Very High	Very Low	Very Low	Very Low	High	Very High	Very Low	Very Low	Very High	Very High	0
17081316	GB112070061600	1	0	0	1	0	0	0	1	1	0	0	Very High	Very Low	Very Low	Very High	Very Low	Very Low	Very Low	Very High	Very High	Very Low	Very Low	Very High	7.32387	0	0	1.34913	0	0	0	0.683561	6.40838	0	0	Very High	Very Low	Very Low	Very High	Very Low	Very Low	Very Low	High	Very High	Very Low	Very Low	Very High	Very High	0
17081316	GB112070061610	0.981923	0	0	1	0	0	0	0.990879	0.990879	0	0	Very High	Very Low	Very Low	Very High	Very Low	Very Low	Very Low	Very High	Very High	Very Low	Very Low	Very High	7.32387	0	0	1.34913	0	0	0	0.683561	6.40838	0	0	Very High	Very Low	Very Low	Very High	Very Low	Very Low	Very Low	High	Very High	Very Low	Very Low	Very High	Very High	0
17081316	GB112070064780	1	0	0	1	0	0	0	1	1	0	0	Very High	Very Low	Very Low	Very High	Very Low	Very Low	Very Low	Very High	Very High	Very Low	Very Low	Very High	7.32387	0	0	1.34913	0	0	0	0.683561	6.40838	0	0	Very High	Very Low	Very Low	Very High	Very Low	Very Low	Very Low	High	Very High	Very Low	Very Low	Very High	Very High	0
17081316	GB112070064820	0.615815	0	0	0.290519	0	0	0	0.135079	0.615237	0	0	High	Very Low	Very Low	Low	Very Low	Very Low	Very Low	Very Low	High	Very Low	Very Low	High	7.32387	0	0	1.34913	0	0	0	0.683561	6.40838	0	0	Very High	Very Low	Very Low	Very High	Very Low	Very Low	Very Low	High	Very High	Very Low	Very Low	Very High	Very High	0
17081316	GB112070064850	0.601784	0	0	1	0	0	0	0.27676	0.622131	0	0	High	Very Low	Very Low	Very High	Very Low	Very Low	Very Low	Low	High	Very Low	Very Low	Very High	7.32387	0	0	1.34913	0	0	0	0.683561	6.40838	0	0	Very High	Very Low	Very Low	Very High	Very Low	Very Low	Very Low	High	Very High	Very Low	Very Low	Very High	Very High	0
17081316	GB112071065510	0.0314938	0	0	0.00881628	0	0	0	0.00643217	0.0486785	0	0	Very Low	Very Low	Very Low	Very Low	Very Low	Very Low	Very Low	Very Low	Very Low	Very Low	Very Low	Very Low	7.32387	0	0	1.34913	0	0	0	0.683561	6.40838	0	0	Very High	Very Low	Very Low	Very High	Very Low	Very Low	Very Low	High	Very High	Very Low	Very Low	Very High	Very High	0
17160003	GB112071065490	0.00561601	0	0	0	0	0	0	0	0.0150993	0	0	Very Low	Very Low	Very Low	Very Low	Very Low	Very Low	Very Low	Very Low	Very Low	Very Low	Very Low	Very Low	2.88992	0	0	0	0	0	0	0	2.52868	0	0	Very High	Very Low	Very Low	Very Low	Very Low	Very Low	Very Low	Very Low	Very High	Very Low	Very Low	Very High	Very High	0
17160003	GB112071065710	0.766015	0	0	0	0	0	0	0	0.494587	0	0	High	Very Low	Very Low	Very Low	Very Low	Very Low	Very Low	Very Low	Moderate	Very Low	Very Low	High	2.88992	0	0	0	0	0	0	0	2.52868	0	0	Very High	Very Low	Very Low	Very Low	Very Low	Very Low	Very Low	Very Low	Very High	Very Low	Very Low	Very High	Very High	0
17160005	GB112069064660	0	0	0	0	0	0	0	0	0	0	0	Very Low	Very Low	Very Low	Very Low	Very Low	Very Low	Very Low	Very Low	Very Low	Very Low	Very Low	Very Low	18.5661	0	0	0	0	0	0	0.348818	2.87775	0	0	Very High	Very Low	Very Low	Very Low	Very Low	Very Low	Very Low	Low	Very High	Very Low	Very Low	Very High	Very High	0
17160005	GB112071065060	1	0	0	0	0	0	0	1	1	0	0	Very High	Very Low	Very Low	Very Low	Very Low	Very Low	Very Low	Very High	Very High	Very Low	Very Low	Very High	18.5661	0	0	0	0	0	0	0.348818	2.87775	0	0	Very High	Very Low	Very Low	Very Low	Very Low	Very Low	Very Low	Low	Very High	Very Low	Very Low	Very High	Very High	0
17160005	GB112071065120	1	0	0	0	0	0	0	1	1	0	0	Very High	Very Low	Very Low	Very Low	Very Low	Very Low	Very Low	Very High	Very High	Very Low	Very Low	Very High	18.5661	0	0	0	0	0	0	0.348818	2.87775	0	0	Very High	Very Low	Very Low	Very Low	Very Low	Very Low	Very Low	Low	Very High	Very Low	Very Low	Very High	Very High	0
17160005	GB112071065130	1	0	0	0	0	0	0	1	1	0	0	Very High	Very Low	Very Low	Very Low	Very Low	Very Low	Very Low	Very High	Very High	Very Low	Very Low	Very High	18.5661	0	0	0	0	0	0	0.348818	2.87775	0	0	Very High	Very Low	Very Low	Very Low	Very Low	Very Low	Very Low	Low	Very High	Very Low	Very Low	Very High	Very High	0
17160005	GB112071065150	1	0	0	0	0	0	0	1	1	0	0	Very High	Very Low	Very Low	Very Low	Very Low	Very Low	Very Low	Very High	Very High	Very Low	Very Low	Very High	18.5661	0	0	0	0	0	0	0.348818	2.87775	0	0	Very High	Very Low	Very Low	Very Low	Very Low	Very Low	Very Low	Low	Very High	Very Low	Very Low	Very High	Very High	0
17160005	GB112071065170	1	0	0	0	0	0	0	1	1	0	0	Very High	Very Low	Very Low	Very Low	Very Low	Very Low	Very Low	Very High	Very High	Very Low	Very Low	Very High	18.5661	0	0	0	0	0	0	0.348818	2.87775	0	0	Very High	Very Low	Very Low	Very Low	Very Low	Very Low	Very Low	Low	Very High	Very Low	Very Low	Very High	Very High	0
17160005	GB112071065490	0.438693	0	0	0	0	0	0	0.0795031	0.297154	0	0	Moderate	Very Low	Very Low	Very Low	Very Low	Very Low	Very Low	Very Low	Low	Very Low	Very Low	Moderate	18.5661	0	0	0	0	0	0	0.348818	2.87775	0	0	Very High	Very Low	Very Low	Very Low	Very Low	Very Low	Very Low	Low	Very High	Very Low	Very Low	Very High	Very High	0
17160006	GB112071065200	0.805703	0	0	0	0	0	0	0.0722779	0.391264	0.226101	0	Very High	Very Low	Very Low	Very Low	Very Low	Very Low	Very Low	Very Low	Low	Low	Very Low	Very High	4.14909	0	0	0	0	0	0	0.0779526	0.643109	0.292322	0	Very High	Very Low	Very Low	Very Low	Very Low	Very Low	Very Low	Very Low	High	Low	Very Low	Very High	Very High	0
17160006	GB112071065210	1	0	0	0	0	0	0	1	1	1	0	Very High	Very Low	Very Low	Very Low	Very Low	Very Low	Very Low	Very High	Very High	Very High	Very Low	Very High	4.14909	0	0	0	0	0	0	0.0779526	0.643109	0.292322	0	Very High	Very Low	Very Low	Very Low	Very Low	Very Low	Very Low	Very Low	High	Low	Very Low	Very High	Very High	0
17160008	GB112071065040	1	0	0	1	0	0	0	1	1	0	0	Very High	Very Low	Very Low	Very High	Very Low	Very Low	Very Low	Very High	Very High	Very Low	Very Low	Very High	25.5161	0	0	0.94617	0	0	0	0.479393	3.95499	0	0	Very High	Very Low	Very Low	Very High	Very Low	Very Low	Very Low	Moderate	Very High	Very Low	Very Low	Very High	Very High	0
17160008	GB112071065050	1	0	0	1	0	0	0	1	1	0	0	Very High	Very Low	Very Low	Very High	Very Low	Very Low	Very Low	Very High	Very High	Very Low	Very Low	Very High	25.5161	0	0	0.94617	0	0	0	0.479393	3.95499	0	0	Very High	Very Low	Very Low	Very High	Very Low	Very Low	Very Low	Moderate	Very High	Very Low	Very Low	Very High	Very High	0
17160008	GB112071065070	1	0	0	1	0	0	0	1	1	0	0	Very High	Very Low	Very Low	Very High	Very Low	Very Low	Very Low	Very High	Very High	Very Low	Very Low	Very High	25.5161	0	0	0.94617	0	0	0	0.479393	3.95499	0	0	Very High	Very Low	Very Low	Very High	Very Low	Very Low	Very Low	Moderate	Very High	Very Low	Very Low	Very High	Very High	0
17160008	GB112071065080	1	0	0	1	0	0	0	1	1	0	0	Very High	Very Low	Very Low	Very High	Very Low	Very Low	Very Low	Very High	Very High	Very Low	Very Low	Very High	25.5161	0	0	0.94617	0	0	0	0.479393	3.95499	0	0	Very High	Very Low	Very Low	Very High	Very Low	Very Low	Very Low	Moderate	Very High	Very Low	Very Low	Very High	Very High	0
17160008	GB112071065140	1	0	0	1	0	0	0	1	1	0	0	Very High	Very Low	Very Low	Very High	Very Low	Very Low	Very Low	Very High	Very High	Very Low	Very Low	Very High	25.5161	0	0	0.94617	0	0	0	0.479393	3.95499	0	0	Very High	Very Low	Very Low	Very High	Very Low	Very Low	Very Low	Moderate	Very High	Very Low	Very Low	Very High	Very High	0
17160008	GB112071065490	0.456675	0	0	0.252404	0	0	0	0.0827619	0.290001	0	0	Moderate	Very Low	Very Low	Low	Very Low	Very Low	Very Low	Very Low	Low	Very Low	Very Low	Moderate	25.5161	0	0	0.94617	0	0	0	0.479393	3.95499	0	0	Very High	Very Low	Very Low	Very High	Very Low	Very Low	Very Low	Moderate	Very High	Very Low	Very Low	Very High	Very High	0
17160024	GB112069060920	0.0185494	1	0	0	0	0	0	0.0100235	0.0671641	0	0	Very Low	Very High	Very Low	Very Low	Very Low	Very Low	Very Low	Very Low	Very Low	Very Low	Very Low	Very High	6.86002	1.17122	0	0	0	0	0	0.640269	6.00252	0	0	Very High	Very High	Very Low	Very Low	Very Low	Very Low	Very Low	High	Very High	Very Low	Very Low	Very High	Very High	0
17160024	GB112070064911	0.781246	1	0	0	0	0	0	0.643697	0.940266	0	0	High	Very High	Very Low	Very Low	Very Low	Very Low	Very Low	High	Very High	Very Low	Very Low	Very High	6.86002	1.17122	0	0	0	0	0	0.640269	6.00252	0	0	Very High	Very High	Very Low	Very Low	Very Low	Very Low	Very Low	High	Very High	Very Low	Very Low	Very High	Very High	0
17160024	GB112070064951	0.152757	1	0	0	0	0	0	0.657454	0.777266	0	0	Very Low	Very High	Very Low	Very Low	Very Low	Very Low	Very Low	High	High	Very Low	Very Low	Very High	6.86002	1.17122	0	0	0	0	0	0.640269	6.00252	0	0	Very High	Very High	Very Low	Very Low	Very Low	Very Low	Very Low	High	Very High	Very Low	Very Low	Very High	Very High	0
17160024	GB112071065240	0.985262	1	0	0	0	0	0	0.982848	0.98921	0	0	Very High	Very High	Very Low	Very Low	Very Low	Very Low	Very Low	Very High	Very High	Very Low	Very Low	Very High	6.86002	1.17122	0	0	0	0	0	0.640269	6.00252	0	0	Very High	Very High	Very Low	Very Low	Very Low	Very Low	Very Low	High	Very High	Very Low	Very Low	Very High	Very High	0
17160024	GB112071065250	1	1	0	0	0	0	0	1	1	0	0	Very High	Very High	Very Low	Very Low	Very Low	Very Low	Very Low	Very High	Very High	Very Low	Very Low	Very High	6.86002	1.17122	0	0	0	0	0	0.640269	6.00252	0	0	Very High	Very High	Very Low	Very Low	Very Low	Very Low	Very Low	High	Very High	Very Low	Very Low	Very High	Very High	0
17160024	GB112071065260	0	0	0	0	0	0	0	0	0	0	0	Very Low	Very Low	Very Low	Very Low	Very Low	Very Low	Very Low	Very Low	Very Low	Very Low	Very Low	Very Low	6.86002	1.17122	0	0	0	0	0	0.640269	6.00252	0	0	Very High	Very High	Very Low	Very Low	Very Low	Very Low	Very Low	High	Very High	Very Low	Very Low	Very High	Very High	0
17160024	GB112071065270	0.248751	1	0	0	0	0	0	0.0779274	0.555475	0	0	Low	Very High	Very Low	Very Low	Very Low	Very Low	Very Low	Very Low	Moderate	Very Low	Very Low	Very High	6.86002	1.17122	0	0	0	0	0	0.640269	6.00252	0	0	Very High	Very High	Very Low	Very Low	Very Low	Very Low	Very Low	High	Very High	Very Low	Very Low	Very High	Very High	0
17160024	GB112071065300	0.191158	0.0502915	0	0	0	0	0	0.0263893	0.202058	0	0	Very Low	Very Low	Very Low	Very Low	Very Low	Very Low	Very Low	Very Low	Low	Very Low	Very Low	Low	6.86002	1.17122	0	0	0	0	0	0.640269	6.00252	0	0	Very High	Very High	Very Low	Very Low	Very Low	Very Low	Very Low	High	Very High	Very Low	Very Low	Very High	Very High	0
17160024	GB112071065310	0.9777	1	0	0	0	0	0	0.992039	0.994048	0	0	Very High	Very High	Very Low	Very Low	Very Low	Very Low	Very Low	Very High	Very High	Very Low	Very Low	Very High	6.86002	1.17122	0	0	0	0	0	0.640269	6.00252	0	0	Very High	Very High	Very Low	Very Low	Very Low	Very Low	Very Low	High	Very High	Very Low	Very Low	Very High	Very High	0
17160024	GB112071065500	0.786746	1	0	0	0	0	0	0.99859	0.929296	0	0	High	Very High	Very Low	Very Low	Very Low	Very Low	Very Low	Very High	Very High	Very Low	Very Low	Very High	6.86002	1.17122	0	0	0	0	0	0.640269	6.00252	0	0	Very High	Very High	Very Low	Very Low	Very Low	Very Low	Very Low	High	Very High	Very Low	Very Low	Very High	Very High	0
17160028	GB112071065540	0.633011	0	0	0	0	0	0	0.0313895	0.210956	0	0	High	Very Low	Very Low	Very Low	Very Low	Very Low	Very Low	Very Low	Low	Very Low	Very Low	High	1.72488	0	0	0	0	0	0	0.0324068	0.267356	0	0	Very High	Very Low	Very Low	Very Low	Very Low	Very Low	Very Low	Very Low	Low	Very Low	Very Low	Very High	Very High	0
17160030	GB112071065330	0.0017665	0	0	0	0	0	0	0.000165138	0.00154603	0	0	Very Low	Very Low	Very Low	Very Low	Very Low	Very Low	Very Low	Very Low	Very Low	Very Low	Very Low	Very Low	0.00176963	0	0	0	0	0	0	0.000165165	0.00154842	0	0	Very Low	Very Low	Very Low	Very Low	Very Low	Very Low	Very Low	Very Low	Very Low	Very Low	Very Low	Very Low	Very Low	0
17160033	GB112071065510	0.567416	0	0	0.204904	0	0	0	0.115887	0.526216	0	0	Moderate	Very Low	Very Low	Low	Very Low	Very Low	Very Low	Very Low	Moderate	Very Low	Very Low	Moderate	2.41153	0	0	0.44423	0	0	0	0.225076	2.11009	0	0	Very High	Very Low	Very Low	Moderate	Very Low	Very Low	Very Low	Low	Very High	Very Low	Very Low	Very High	Very High	0
17160033	GB112071065612	0.834457	0	0	1	0	0	0	0.805077	0.872925	0	0	Very High	Very Low	Very Low	Very High	Very Low	Very Low	Very Low	Very High	Very High	Very Low	Very Low	Very High	2.41153	0	0	0.44423	0	0	0	0.225076	2.11009	0	0	Very High	Very Low	Very Low	Moderate	Very Low	Very Low	Very Low	Low	Very High	Very Low	Very Low	Very High	Very High	0
17160034	GB112071065612	0.0819153	0	0	0	0	0	0	0	0.0571277	0	0	Very Low	Very Low	Very Low	Very Low	Very Low	Very Low	Very Low	Very Low	Very Low	Very Low	Very Low	Very Low	1.47023	0	0	0	0	0	0	0	1.28645	0	0	Very High	Very Low	Very Low	Very Low	Very Low	Very Low	Very Low	Very Low	Very High	Very Low	Very Low	Very High	Very High	0
17160035	GB112071065612	0.0145271	0	0	0	0	0	0	0.0233593	0.012664	0	0	Very Low	Very Low	Very Low	Very Low	Very Low	Very Low	Very Low	Very Low	Very Low	Very Low	Very Low	Very Low	1.4976	0	0	0	0	0	0	0.139776	1.3104	0	0	Very High	Very Low	Very Low	Very Low	Very Low	Very Low	Very Low	Very Low	Very High	Very Low	Very Low	Very High	Very High	0
17160036	GB112071065613	0.442501	0	0	0	0	0	0	0.0689715	0.409859	0	0	Moderate	Very Low	Very Low	Very Low	Very Low	Very Low	Very Low	Very Low	Moderate	Very Low	Very Low	Moderate	0.805812	0	0	0	0	0	0	0.0752091	0.705085	0	0	Very High	Very Low	Very Low	Very Low	Very Low	Very Low	Very Low	Very Low	High	Very Low	Very Low	Very High	Very High	0
17160038	GB112071065550	0	0	0	0	0	0	0	0	0	0	0	Very Low	Very Low	Very Low	Very Low	Very Low	Very Low	Very Low	Very Low	Very Low	Very Low	Very Low	Very Low	NA	NA	NA	NA	NA	NA	NA	NA	NA	NA	NA	NA	NA	NA	NA	NA	NA	NA	NA	NA	NA	NA	NA	Very Low	0
17160039	GB112071065640	0.702047	0	0	0	0	0	0	0.180271	0.673384	0	0	High	Very Low	Very Low	Very Low	Very Low	Very Low	Very Low	Very Low	High	Very Low	Very Low	High	2.35623	0	0	0	0	0	0	0.219915	2.0617	0	0	Very High	Very Low	Very Low	Very Low	Very Low	Very Low	Very Low	Low	Very High	Very Low	Very Low	Very High	Very High	0
17160040	GB112071065500	0.0991693	0	0	0	0	0	0	0	0.0307486	0	0	Very Low	Very Low	Very Low	Very Low	Very Low	Very Low	Very Low	Very Low	Very Low	Very Low	Very Low	Very Low	2.55634	0	0	0	0	0	0	0	2.2368	0	0	Very High	Very Low	Very Low	Very Low	Very Low	Very Low	Very Low	Very Low	Very High	Very Low	Very Low	Very High	Very High	0
17160041	GB112071065600	0.557732	0	0	0	0	0	0	0.105306	0.524588	0	0	Moderate	Very Low	Very Low	Very Low	Very Low	Very Low	Very Low	Very Low	Moderate	Very Low	Very Low	Moderate	1.26107	0	0	0	0	0	0	0.1177	1.10344	0	0	Very High	Very Low	Very Low	Very Low	Very Low	Very Low	Very Low	Very Low	Very High	Very Low	Very Low	Very High	Very High	0
17160043	GB112071065500	0.0101609	0	0	0	0	0	0	0	0.0031505	0	0	Very Low	Very Low	Very Low	Very Low	Very Low	Very Low	Very Low	Very Low	Very Low	Very Low	Very Low	Very Low	0.157158	0	0	0	0	0	0	0	0.137513	0	0	Very Low	Very Low	Very Low	Very Low	Very Low	Very Low	Very Low	Very Low	Very Low	Very Low	Very Low	Very Low	Very Low	0
17160045	GB112071065614	0.268532	0	0	0	0	0	0	0.0331288	0.243126	0	0	Low	Very Low	Very Low	Very Low	Very Low	Very Low	Very Low	Very Low	Low	Very Low	Very Low	Low	0.367113	0	0	0	0	0	0	0.0342639	0.321224	0	0	Low	Very Low	Very Low	Very Low	Very Low	Very Low	Very Low	Very Low	Low	Very Low	Very Low	Low	Low	0
17160046	GB112071065350	0.0453634	0	0	0	0	0	0	0	0.0399193	0	0	Very Low	Very Low	Very Low	Very Low	Very Low	Very Low	Very Low	Very Low	Very Low	Very Low	Very Low	Very Low	0.047519	0	0	0	0	0	0	0	0.0415791	0	0	Very Low	Very Low	Very Low	Very Low	Very Low	Very Low	Very Low	Very Low	Very Low	Very Low	Very Low	Very Low	Very Low	0
17160048	GB112071065520	0.785342	0	0	0	0	0	0	0.254547	0.761976	0	0	High	Very Low	Very Low	Very Low	Very Low	Very Low	Very Low	Low	High	Very Low	Very Low	High	3.84125	0	0	0	0	0	0	0.358517	3.3611	0	0	Very High	Very Low	Very Low	Very Low	Very Low	Very Low	Very Low	Low	Very High	Very Low	Very Low	Very High	Very High	0
17160048	GB112071065612	0.00368458	0	0	0	0	0	0	0.00444357	0.00321203	0	0	Very Low	Very Low	Very Low	Very Low	Very Low	Very Low	Very Low	Very Low	Very Low	Very Low	Very Low	Very Low	3.84125	0	0	0	0	0	0	0.358517	3.3611	0	0	Very High	Very Low	Very Low	Very Low	Very Low	Very Low	Very Low	Low	Very High	Very Low	Very Low	Very High	Very High	0
17160049	GB112071065710	0.091053	0	0	0	0	0	0	0.05612	0.180891	0.0435222	0	Very Low	Very Low	Very Low	Very Low	Very Low	Very Low	Very Low	Very Low	Very Low	Very Low	Very Low	Very Low	0.637036	0	0	0	0	0	0	0.0594567	0.557407	0.0455026	0	High	Very Low	Very Low	Very Low	Very Low	Very Low	Very Low	Very Low	Moderate	Very Low	Very Low	High	High	0
17160059	GB112071065130	0	0	0	0	0	0	0	0	0	0	0	Very Low	Very Low	Very Low	Very Low	Very Low	Very Low	Very Low	Very Low	Very Low	Very Low	Very Low	Very Low	NA	NA	NA	NA	NA	NA	NA	NA	NA	NA	NA	NA	NA	NA	NA	NA	NA	NA	NA	NA	NA	NA	NA	Very Low	0
17160064	GB112069061170	0	0	0	0	0	0	0	0	0	0	0	Very Low	Very Low	Very Low	Very Low	Very Low	Very Low	Very Low	Very Low	Very Low	Very Low	Very Low	Very Low	2.64504	0	0	0	0	0	0	0.246871	2.31441	0	0	Very High	Very Low	Very Low	Very Low	Very Low	Very Low	Very Low	Low	Very High	Very Low	Very Low	Very High	Very High	0
17160064	GB112069061452	0.0110693	0	0	0	0	0	0	0.00749807	0.00979354	0	0	Very Low	Very Low	Very Low	Very Low	Very Low	Very Low	Very Low	Very Low	Very Low	Very Low	Very Low	Very Low	2.64504	0	0	0	0	0	0	0.246871	2.31441	0	0	Very High	Very Low	Very Low	Very Low	Very Low	Very Low	Very Low	Low	Very High	Very Low	Very Low	Very High	Very High	0
17160064	GB112070064912	0.000278869	0	0	0	0	0	0	0.000202193	0.000608377	0	0	Very Low	Very Low	Very Low	Very Low	Very Low	Very Low	Very Low	Very Low	Very Low	Very Low	Very Low	Very Low	2.64504	0	0	0	0	0	0	0.246871	2.31441	0	0	Very High	Very Low	Very Low	Very Low	Very Low	Very Low	Very Low	Low	Very High	Very Low	Very Low	Very High	Very High	0
17160064	GB112071065470	1	0	0	0	0	0	0	1	1	0	0	Very High	Very Low	Very Low	Very Low	Very Low	Very Low	Very Low	Very High	Very High	Very Low	Very Low	Very High	2.64504	0	0	0	0	0	0	0.246871	2.31441	0	0	Very High	Very Low	Very Low	Very Low	Very Low	Very Low	Very Low	Low	Very High	Very Low	Very Low	Very High	Very High	0
17160064	GB112071065500	0.000314047	0	0	0	0	0	0	0.000930088	9.74e-05	0	0	Very Low	Very Low	Very Low	Very Low	Very Low	Very Low	Very Low	Very Low	Very Low	Very Low	Very Low	Very Low	2.64504	0	0	0	0	0	0	0.246871	2.31441	0	0	Very High	Very Low	Very Low	Very Low	Very Low	Very Low	Very Low	Low	Very High	Very Low	Very Low	Very High	Very High	0
17160064	GB112071065650	1	0	0	0	0	0	0	1	1	0	0	Very High	Very Low	Very Low	Very Low	Very Low	Very Low	Very Low	Very High	Very High	Very Low	Very Low	Very High	2.64504	0	0	0	0	0	0	0.246871	2.31441	0	0	Very High	Very Low	Very Low	Very Low	Very Low	Very Low	Very Low	Low	Very High	Very Low	Very Low	Very High	Very High	0
17160064	GB112071065651	0.731918	0	0	0	0	0	0	1	0.784495	0	0	High	Very Low	Very Low	Very Low	Very Low	Very Low	Very Low	Very High	High	Very Low	Very Low	Very High	2.64504	0	0	0	0	0	0	0.246871	2.31441	0	0	Very High	Very Low	Very Low	Very Low	Very Low	Very Low	Very Low	Low	Very High	Very Low	Very Low	Very High	Very High	0
17160064	GB112071065670	1	0	0	0	0	0	0	1	1	0	0	Very High	Very Low	Very Low	Very Low	Very Low	Very Low	Very Low	Very High	Very High	Very Low	Very Low	Very High	2.64504	0	0	0	0	0	0	0.246871	2.31441	0	0	Very High	Very Low	Very Low	Very Low	Very Low	Very Low	Very Low	Low	Very High	Very Low	Very Low	Very High	Very High	0
17160064	GB112072065760	1	0	0	0	0	0	0	1	1	0	0	Very High	Very Low	Very Low	Very Low	Very Low	Very Low	Very Low	Very High	Very High	Very Low	Very Low	Very High	2.64504	0	0	0	0	0	0	0.246871	2.31441	0	0	Very High	Very Low	Very Low	Very Low	Very Low	Very Low	Very Low	Low	Very High	Very Low	Very Low	Very High	Very High	0
17160064	GB112073071050	0.927114	0	0	0	0	0	0	0.682385	0.91281	0	0	Very High	Very Low	Very Low	Very Low	Very Low	Very Low	Very Low	High	Very High	Very Low	Very Low	Very High	2.64504	0	0	0	0	0	0	0.246871	2.31441	0	0	Very High	Very Low	Very Low	Very Low	Very Low	Very Low	Very Low	Low	Very High	Very Low	Very Low	Very High	Very High	0
17160064	GB531207112400	0.453115	0	0	0	0	0	0	0.107573	0.421454	0	0	Moderate	Very Low	Very Low	Very Low	Very Low	Very Low	Very Low	Very Low	Moderate	Very Low	Very Low	Moderate	2.64504	0	0	0	0	0	0	0.246871	2.31441	0	0	Very High	Very Low	Very Low	Very Low	Very Low	Very Low	Very Low	Low	Very High	Very Low	Very Low	Very High	Very High	0
17160064	GB641211630001	6.85e-06	0	0	0	0	0	0	1	1.01e-05	0	0	Very Low	Very Low	Very Low	Very Low	Very Low	Very Low	Very Low	Very High	Very Low	Very Low	Very Low	Very High	2.64504	0	0	0	0	0	0	0.246871	2.31441	0	0	Very High	Very Low	Very Low	Very Low	Very Low	Very Low	Very Low	Low	Very High	Very Low	Very Low	Very High	Very High	13
17160065	GB112070064911	0.179388	0	0	0	0	0	0	0.344877	0.0566743	0	0	Very Low	Very Low	Very Low	Very Low	Very Low	Very Low	Very Low	Low	Very Low	Very Low	Very Low	Low	1.06761	0	0	0	0	0	0	0.0996432	0.934155	0	0	Very High	Very Low	Very Low	Very Low	Very Low	Very Low	Very Low	Very Low	Very High	Very Low	Very Low	Very High	Very High	0
17160065	GB112071065280	1	0	0	0	0	0	0	1	1	0	0	Very High	Very Low	Very Low	Very Low	Very Low	Very Low	Very Low	Very High	Very High	Very Low	Very Low	Very High	1.06761	0	0	0	0	0	0	0.0996432	0.934155	0	0	Very High	Very Low	Very Low	Very Low	Very Low	Very Low	Very Low	Very Low	Very High	Very Low	Very Low	Very High	Very High	0
17160065	GB112071065300	0.192529	0	0	0	0	0	0	0.0620168	0.0534206	0	0	Very Low	Very Low	Very Low	Very Low	Very Low	Very Low	Very Low	Very Low	Very Low	Very Low	Very Low	Very Low	1.06761	0	0	0	0	0	0	0.0996432	0.934155	0	0	Very High	Very Low	Very Low	Very Low	Very Low	Very Low	Very Low	Very Low	Very High	Very Low	Very Low	Very High	Very High	0
17160065	GB112071065500	0.000162161	0	0	0	0	0	0	0.00048026	5.03e-05	0	0	Very Low	Very Low	Very Low	Very Low	Very Low	Very Low	Very Low	Very Low	Very Low	Very Low	Very Low	Very Low	1.06761	0	0	0	0	0	0	0.0996432	0.934155	0	0	Very High	Very Low	Very Low	Very Low	Very Low	Very Low	Very Low	Very Low	Very High	Very Low	Very Low	Very High	Very High	0
17160065	GB531207112400	0.0218236	0	0	0	0	0	0	0.00518109	0.0202987	0	0	Very Low	Very Low	Very Low	Very Low	Very Low	Very Low	Very Low	Very Low	Very Low	Very Low	Very Low	Very Low	1.06761	0	0	0	0	0	0	0.0996432	0.934155	0	0	Very High	Very Low	Very Low	Very Low	Very Low	Very Low	Very Low	Very Low	Very High	Very Low	Very Low	Very High	Very High	0
17160091	GB112071065570	0	0	0	0	0	0	0	0	0	0	0	Very Low	Very Low	Very Low	Very Low	Very Low	Very Low	Very Low	Very Low	Very Low	Very Low	Very Low	Very Low	NA	NA	NA	NA	NA	NA	NA	NA	NA	NA	NA	NA	NA	NA	NA	NA	NA	NA	NA	NA	NA	NA	NA	Very Low	0
17180634	GB112071065490	0.00438159	0	0	0	0	0	0	0.0065745	0.0157073	0	0	Very Low	Very Low	Very Low	Very Low	Very Low	Very Low	Very Low	Very Low	Very Low	Very Low	Very Low	Very Low	2.51563	0	0	0	0	0	0	0.234792	2.20117	0	0	Very High	Very Low	Very Low	Very Low	Very Low	Very Low	Very Low	Low	Very High	Very Low	Very Low	Very High	Very High	0
17260004	GB112072065990	0.451796	0	0	0	0	0	0	0.069878	0.41902	0	0	Moderate	Very Low	Very Low	Very Low	Very Low	Very Low	Very Low	Very Low	Moderate	Very Low	Very Low	Moderate	1.19114	0	0	0	0	0	0	0.111173	1.04224	0	0	Very High	Very Low	Very Low	Very Low	Very Low	Very Low	Very Low	Very Low	Very High	Very Low	Very Low	Very High	Very High	0
17260005	GB112072071610	0.750486	0	0	0	0	0	0	0.192933	0.725728	0	0	High	Very Low	Very Low	Very Low	Very Low	Very Low	Very Low	Very Low	High	Very Low	Very Low	High	4.0219	0	0	0	0	0	0	0.375377	3.51916	0	0	Very High	Very Low	Very Low	Very Low	Very Low	Very Low	Very Low	Low	Very High	Very Low	Very Low	Very High	Very High	0
17260007	GB112072065990	0	0	0	0	0	0	0	0	0	0	0	Very Low	Very Low	Very Low	Very Low	Very Low	Very Low	Very Low	Very Low	Very Low	Very Low	Very Low	Very Low	0	0	0	0	0	0	0	0	0	0	0	Very Low	Very Low	Very Low	Very Low	Very Low	Very Low	Very Low	Very Low	Very Low	Very Low	Very Low	Very Low	Very Low	0
17260021	GB112072071610	0.0107085	0	0	0	0	0	0	0.00550581	0.0103552	0	0	Very Low	Very Low	Very Low	Very Low	Very Low	Very Low	Very Low	Very Low	Very Low	Very Low	Very Low	Very Low	0.205121	0	0	0	0	0	0	0.0191447	0.179481	0	0	Low	Very Low	Very Low	Very Low	Very Low	Very Low	Very Low	Very Low	Very Low	Very Low	Very Low	Low	Low	0
17260043	GB112072065790	1	0	0	0	0	0	0	1	1	1	0	Very High	Very Low	Very Low	Very Low	Very Low	Very Low	Very Low	Very High	Very High	Very High	Very Low	Very High	3.22861	0	0	0	0	0	0	0.301337	2.82503	0.230615	0	Very High	Very Low	Very Low	Very Low	Very Low	Very Low	Very Low	Low	Very High	Low	Very Low	Very High	Very High	0
17260043	GB112072065800	0.7531	0	0	0	0	0	0	0.2216	0.727442	0.178896	0	High	Very Low	Very Low	Very Low	Very Low	Very Low	Very Low	Low	High	Very Low	Very Low	High	3.22861	0	0	0	0	0	0	0.301337	2.82503	0.230615	0	Very High	Very Low	Very Low	Very Low	Very Low	Very Low	Very Low	Low	Very High	Low	Very Low	Very High	Very High	0
17260046	GB112072065821	1	0	0	0	0	0	0	1	1	0	0	Very High	Very Low	Very Low	Very Low	Very Low	Very Low	Very Low	Very High	Very High	Very Low	Very Low	Very High	2.37719	0	0	0	0	0	0	0.221871	2.08004	0	0	Very High	Very Low	Very Low	Very Low	Very Low	Very Low	Very Low	Low	Very High	Very Low	Very Low	Very High	Very High	0
17260046	GB112072065822	0.562624	0	0	0	0	0	0	0.107191	0.529537	0	0	Moderate	Very Low	Very Low	Very Low	Very Low	Very Low	Very Low	Very Low	Moderate	Very Low	Very Low	Moderate	2.37719	0	0	0	0	0	0	0.221871	2.08004	0	0	Very High	Very Low	Very Low	Very Low	Very Low	Very Low	Very Low	Low	Very High	Very Low	Very Low	Very High	Very High	0
17260046	GB112072066220	1	0	0	0	0	0	0	1	1	0	0	Very High	Very Low	Very Low	Very Low	Very Low	Very Low	Very Low	Very High	Very High	Very Low	Very Low	Very High	2.37719	0	0	0	0	0	0	0.221871	2.08004	0	0	Very High	Very Low	Very Low	Very Low	Very Low	Very Low	Very Low	Low	Very High	Very Low	Very Low	Very High	Very High	0
17260046	GB112072066250	0.113325	0	0	0	0	0	0	1	0.1456	0	0	Very Low	Very Low	Very Low	Very Low	Very Low	Very Low	Very Low	Very High	Very Low	Very Low	Very Low	Very High	2.37719	0	0	0	0	0	0	0.221871	2.08004	0	0	Very High	Very Low	Very Low	Very Low	Very Low	Very Low	Very Low	Low	Very High	Very Low	Very Low	Very High	Very High	0
17260052	GB112072065880	0.00010918	0	0	0	0	0	0	1.52e-06	3.14e-05	0	0	Very Low	Very Low	Very Low	Very Low	Very Low	Very Low	Very Low	Very Low	Very Low	Very Low	Very Low	Very Low	0.000109192	0	0	0	0	0	0	1.52e-06	3.14e-05	0	0	Very Low	Very Low	Very Low	Very Low	Very Low	Very Low	Very Low	Very Low	Very Low	Very Low	Very Low	Very Low	Very Low	0
17260053	GB112072066110	0.569284	0	0	0	0	0	0	0	0.536286	0.0862641	0	Moderate	Very Low	Very Low	Very Low	Very Low	Very Low	Very Low	Very Low	Moderate	Very Low	Very Low	Moderate	1.32171	0	0	0	0	0	0	0	1.1565	0.0944081	0	Very High	Very Low	Very Low	Very Low	Very Low	Very Low	Very Low	Very Low	Very High	Very Low	Very Low	Very High	Very High	0
17260056	GB112072066120	0.00162657	0	0	0	0	0	0	0.0480483	0.00240284	0	0	Very Low	Very Low	Very Low	Very Low	Very Low	Very Low	Very Low	Very Low	Very Low	Very Low	Very Low	Very Low	0.540787	0	0	0	0	0	0	0.0504735	0.473189	0	0	Moderate	Very Low	Very Low	Very Low	Very Low	Very Low	Very Low	Very Low	Moderate	Very Low	Very Low	Moderate	Moderate	0
17260071	GB112069061451	0.00110333	0	0	0	0	0	0	0	0.000776131	0	0	Very Low	Very Low	Very Low	Very Low	Very Low	Very Low	Very Low	Very Low	Very Low	Very Low	Very Low	Very Low	1.10486	0	0	0	0	0	0	0	0.966751	0	0	Very High	Very Low	Very Low	Very Low	Very Low	Very Low	Very Low	Very Low	Very High	Very Low	Very Low	Very High	Very High	0
17260071	GB531207212200	0.0363582	0	0	0	0	0	0	0	0.0470133	0	0	Very Low	Very Low	Very Low	Very Low	Very Low	Very Low	Very Low	Very Low	Very Low	Very Low	Very Low	Very Low	1.10486	0	0	0	0	0	0	0	0.966751	0	0	Very High	Very Low	Very Low	Very Low	Very Low	Very Low	Very Low	Very Low	Very High	Very Low	Very Low	Very High	Very High	0
17260071	GB641211171000	0.000282118	0	0	0	0	0	0	0	0.000355061	0	0	Very Low	Very Low	Very Low	Very Low	Very Low	Very Low	Very Low	Very Low	Very Low	Very Low	Very Low	Very Low	1.10486	0	0	0	0	0	0	0	0.966751	0	0	Very High	Very Low	Very Low	Very Low	Very Low	Very Low	Very Low	Very Low	Very High	Very Low	Very Low	Very High	Very High	2
17260072	GB112072065880	0	0	0	0	0	0	0	0	0	0	0	Very Low	Very Low	Very Low	Very Low	Very Low	Very Low	Very Low	Very Low	Very Low	Very Low	Very Low	Very Low	NA	NA	NA	NA	NA	NA	NA	NA	NA	NA	NA	NA	NA	NA	NA	NA	NA	NA	NA	NA	NA	NA	NA	Very Low	0
17260137	GB112072065860	0	0	0	0	0	0	0	0	0	0	0	Very Low	Very Low	Very Low	Very Low	Very Low	Very Low	Very Low	Very Low	Very Low	Very Low	Very Low	Very Low	0	0	0	0	0	0	0	0	0	0	0	Very Low	Very Low	Very Low	Very Low	Very Low	Very Low	Very Low	Very Low	Very Low	Very Low	Very Low	Very Low	Very Low	0
17270001	GB112072065960	1	0	0	0	0	0	0	0	1	0	0	Very High	Very Low	Very Low	Very Low	Very Low	Very Low	Very Low	Very Low	Very High	Very Low	Very Low	Very High	1.4161	0	0	0	0	0	0	0	1.23909	0	0	Very High	Very Low	Very Low	Very Low	Very Low	Very Low	Very Low	Very Low	Very High	Very Low	Very Low	Very High	Very High	0
17270001	GB112072065980	0.218338	0	0	0	0	0	0	0	0.124893	0	0	Low	Very Low	Very Low	Very Low	Very Low	Very Low	Very Low	Very Low	Very Low	Very Low	Very Low	Low	1.4161	0	0	0	0	0	0	0	1.23909	0	0	Very High	Very Low	Very Low	Very Low	Very Low	Very Low	Very Low	Very Low	Very High	Very Low	Very Low	Very High	Very High	0
17270002	GB112072065980	0.0284561	0	0	0	0	0	0	0.0377869	0.0347252	0	0	Very Low	Very Low	Very Low	Very Low	Very Low	Very Low	Very Low	Very Low	Very Low	Very Low	Very Low	Very Low	0.621228	0	0	0	0	0	0	0.0579813	0.543574	0	0	High	Very Low	Very Low	Very Low	Very Low	Very Low	Very Low	Very Low	Moderate	Very Low	Very Low	High	High	0
17270003	GB112072065980	0.00411349	0	0	0	0	0	0	0	0.00446198	0	0	Very Low	Very Low	Very Low	Very Low	Very Low	Very Low	Very Low	Very Low	Very Low	Very Low	Very Low	Very Low	0.0509475	0	0	0	0	0	0	0	0.0445791	0	0	Very Low	Very Low	Very Low	Very Low	Very Low	Very Low	Very Low	Very Low	Very Low	Very Low	Very Low	Very Low	Very Low	0
17270006	GB112072071690	0.17104	0	0	0	0	0	0	0	0.158581	0	0	Very Low	Very Low	Very Low	Very Low	Very Low	Very Low	Very Low	Very Low	Very Low	Very Low	Very Low	Very Low	0.274432	0	0	0	0	0	0	0	0.240128	0	0	Low	Very Low	Very Low	Very Low	Very Low	Very Low	Very Low	Very Low	Low	Very Low	Very Low	Low	Low	0
17270008	GB112072071800	0.802193	0	0	0	0	0	0	0.274578	0.780148	0	0	Very High	Very Low	Very Low	Very Low	Very Low	Very Low	Very Low	Low	High	Very Low	Very Low	Very High	4.05544	0	0	0	0	0	0	0.378508	3.54851	0	0	Very High	Very Low	Very Low	Very Low	Very Low	Very Low	Very Low	Low	Very High	Very Low	Very Low	Very High	Very High	0
17270009	GB112072071710	0.571927	0	0	0	0	0	0	0.110873	0.538968	0	0	Moderate	Very Low	Very Low	Very Low	Very Low	Very Low	Very Low	Very Low	Moderate	Very Low	Very Low	Moderate	1.33605	0	0	0	0	0	0	0.124698	1.16905	0	0	Very High	Very Low	Very Low	Very Low	Very Low	Very Low	Very Low	Very Low	Very High	Very Low	Very Low	Very High	Very High	0
17270014	GB112072071690	0.00563768	0	0	0	0	0	0	0	0.00435583	0	0	Very Low	Very Low	Very Low	Very Low	Very Low	Very Low	Very Low	Very Low	Very Low	Very Low	Very Low	Very Low	0.0281784	0	0	0	0	0	0	0	0.0246561	0	0	Very Low	Very Low	Very Low	Very Low	Very Low	Very Low	Very Low	Very Low	Very Low	Very Low	Very Low	Very Low	Very Low	0
17270015	GB112072071680	0.140902	0	0	0	0	0	0	0	0.125499	0	0	Very Low	Very Low	Very Low	Very Low	Very Low	Very Low	Very Low	Very Low	Very Low	Very Low	Very Low	Very Low	0.164011	0	0	0	0	0	0	0	0.14351	0	0	Very Low	Very Low	Very Low	Very Low	Very Low	Very Low	Very Low	Very Low	Very Low	Very Low	Very Low	Very Low	Very Low	0
17270017	GB112072065990	0.000669947	0	0	0	0	0	0	0	0.000621346	0	0	Very Low	Very Low	Very Low	Very Low	Very Low	Very Low	Very Low	Very Low	Very Low	Very Low	Very Low	Very Low	0.00867291	0	0	0	0	0	0	0	0.00758879	0	0	Very Low	Very Low	Very Low	Very Low	Very Low	Very Low	Very Low	Very Low	Very Low	Very Low	Very Low	Very Low	Very Low	0
17270018	GB112072071720	0.706046	0	0	0	0	0	0	0	0.677591	0	0	High	Very Low	Very Low	Very Low	Very Low	Very Low	Very Low	Very Low	High	Very Low	Very Low	High	3.5175	0	0	0	0	0	0	0	3.07781	0	0	Very High	Very Low	Very Low	Very Low	Very Low	Very Low	Very Low	Very Low	Very High	Very Low	Very Low	Very High	Very High	0
17270018	GB112072071760	0.940989	0	0	0	0	0	0	0	0.940989	0	0	Very High	Very Low	Very Low	Very Low	Very Low	Very Low	Very Low	Very Low	Very High	Very Low	Very Low	Very High	3.5175	0	0	0	0	0	0	0	3.07781	0	0	Very High	Very Low	Very Low	Very Low	Very Low	Very Low	Very Low	Very Low	Very High	Very Low	Very Low	Very High	Very High	0
17270020	GB112072066020	1	0	0	0	0	0	0	0	1	0	0	Very High	Very Low	Very Low	Very Low	Very Low	Very Low	Very Low	Very Low	Very High	Very Low	Very Low	Very High	0.136526	0	0	0	0	0	0	0	0.11946	0	0	Very Low	Very Low	Very Low	Very Low	Very Low	Very Low	Very Low	Very Low	Very Low	Very Low	Very Low	Very Low	Very High	0
17270020	GB112072066050	0.105884	0	0	0	0	0	0	0	0.091166	0	0	Very Low	Very Low	Very Low	Very Low	Very Low	Very Low	Very Low	Very Low	Very Low	Very Low	Very Low	Very Low	0.136526	0	0	0	0	0	0	0	0.11946	0	0	Very Low	Very Low	Very Low	Very Low	Very Low	Very Low	Very Low	Very Low	Very Low	Very Low	Very Low	Very Low	Very Low	0
17270050	GB112069061161	0.0734649	0	0	0	0	0	0	0.155485	0.009099	0.258825	0	Very Low	Very Low	Very Low	Very Low	Very Low	Very Low	Very Low	Very Low	Very Low	Low	Very Low	Low	2.06699	0	0	0	0	0	0	0.192919	1.80862	0.147642	0	Very High	Very Low	Very Low	Very Low	Very Low	Very Low	Very Low	Very Low	Very High	Very Low	Very Low	Very High	Very High	0
17270050	GB112072065900	1	0	0	0	0	0	0	1	1	1	0	Very High	Very Low	Very Low	Very Low	Very Low	Very Low	Very Low	Very High	Very High	Very High	Very Low	Very High	2.06699	0	0	0	0	0	0	0.192919	1.80862	0.147642	0	Very High	Very Low	Very Low	Very Low	Very Low	Very Low	Very Low	Very Low	Very High	Very Low	Very Low	Very High	Very High	0
17270050	GB531207212100	0.668337	0	0	0	0	0	0	0.158303	0.638103	0.125825	0	High	Very Low	Very Low	Very Low	Very Low	Very Low	Very Low	Very Low	High	Very Low	Very Low	High	2.06699	0	0	0	0	0	0	0.192919	1.80862	0.147642	0	Very High	Very Low	Very Low	Very Low	Very Low	Very Low	Very Low	Very Low	Very High	Very Low	Very Low	Very High	Very High	0
17270050	GB641211171000	7.99e-05	0	0	0	0	0	0	4.12e-05	1.21e-05	1	0	Very Low	Very Low	Very Low	Very Low	Very Low	Very Low	Very Low	Very Low	Very Low	Very High	Very Low	Very High	2.06699	0	0	0	0	0	0	0.192919	1.80862	0.147642	0	Very High	Very Low	Very Low	Very Low	Very Low	Very Low	Very Low	Very Low	Very High	Very Low	Very Low	Very High	Very High	2
17270051	GB112072065950	1	0	0	0	0	0	0	0	1	0	0	Very High	Very Low	Very Low	Very Low	Very Low	Very Low	Very Low	Very Low	Very High	Very Low	Very Low	Very High	0.551277	0	0	0	0	0	0	0	0.12955	0	0	Moderate	Very Low	Very Low	Very Low	Very Low	Very Low	Very Low	Very Low	Very Low	Very Low	Very Low	Moderate	Very High	0
17270051	GB641211171000	0.00404242	0	0	0	0	0	0	0	0.00136639	0	0	Very Low	Very Low	Very Low	Very Low	Very Low	Very Low	Very Low	Very Low	Very Low	Very Low	Very Low	Very Low	0.551277	0	0	0	0	0	0	0	0.12955	0	0	Moderate	Very Low	Very Low	Very Low	Very Low	Very Low	Very Low	Very Low	Very Low	Very Low	Very Low	Moderate	Moderate	2
17280252	GB112071065651	0.268082	0	0	0	0	0	0	0	0.215505	0	0	Low	Very Low	Very Low	Very Low	Very Low	Very Low	Very Low	Very Low	Low	Very Low	Very Low	Low	1.39688	0	0	0	0	0	0	0	1.22227	0	0	Very High	Very Low	Very Low	Very Low	Very Low	Very Low	Very Low	Very Low	Very High	Very Low	Very Low	Very High	Very High	0
17280252	GB112072066120	0.995366	0	0	0	0	0	0	0	0.992519	0	0	Very High	Very Low	Very Low	Very Low	Very Low	Very Low	Very Low	Very Low	Very High	Very Low	Very Low	Very High	1.39688	0	0	0	0	0	0	0	1.22227	0	0	Very High	Very Low	Very Low	Very Low	Very Low	Very Low	Very Low	Very Low	Very High	Very Low	Very Low	Very High	Very High	0
17280252	GB112072066160	1	0	0	0	0	0	0	0	1	0	0	Very High	Very Low	Very Low	Very Low	Very Low	Very Low	Very Low	Very Low	Very High	Very Low	Very Low	Very High	1.39688	0	0	0	0	0	0	0	1.22227	0	0	Very High	Very Low	Very Low	Very Low	Very Low	Very Low	Very Low	Very Low	Very High	Very Low	Very Low	Very High	Very High	0
17280252	GB112072066250	0.886675	0	0	0	0	0	0	0	0.8544	0	0	Very High	Very Low	Very Low	Very Low	Very Low	Very Low	Very Low	Very Low	Very High	Very Low	Very Low	Very High	1.39688	0	0	0	0	0	0	0	1.22227	0	0	Very High	Very Low	Very Low	Very Low	Very Low	Very Low	Very Low	Very Low	Very High	Very Low	Very Low	Very High	Very High	0
17280252	GB531207212200	0.927319	0	0	0	0	0	0	0	0.899309	0	0	Very High	Very Low	Very Low	Very Low	Very Low	Very Low	Very Low	Very Low	Very High	Very Low	Very Low	Very High	1.39688	0	0	0	0	0	0	0	1.22227	0	0	Very High	Very Low	Very Low	Very Low	Very Low	Very Low	Very Low	Very Low	Very High	Very Low	Very Low	Very High	Very High	0
17280252	GB641211171000	0.00977927	0	0	0	0	0	0	0	0.00923082	0	0	Very Low	Very Low	Very Low	Very Low	Very Low	Very Low	Very Low	Very Low	Very Low	Very Low	Very Low	Very Low	1.39688	0	0	0	0	0	0	0	1.22227	0	0	Very High	Very Low	Very Low	Very Low	Very Low	Very Low	Very Low	Very Low	Very High	Very Low	Very Low	Very High	Very High	2
17280252	GB641211630001	0.0447546	0	0	0	0	0	0	0	0.0497073	0	0	Very Low	Very Low	Very Low	Very Low	Very Low	Very Low	Very Low	Very Low	Very Low	Very Low	Very Low	Very Low	1.39688	0	0	0	0	0	0	0	1.22227	0	0	Very High	Very Low	Very Low	Very Low	Very Low	Very Low	Very Low	Very Low	Very High	Very Low	Very Low	Very High	Very High	13
17370024	GB112073071140	0.0175773	0	0	0	0	0	0	0.0300903	0.0691246	0.0166343	0	Very Low	Very Low	Very Low	Very Low	Very Low	Very Low	Very Low	Very Low	Very Low	Very Low	Very Low	Very Low	0.490892	0	0	0	0	0	0	0.0458166	0.429531	0.0350637	0	Moderate	Very Low	Very Low	Very Low	Very Low	Very Low	Very Low	Very Low	Moderate	Very Low	Very Low	Moderate	Moderate	0
17370027	GB112073071140	0.946616	0	0	0	0	0	0	0.313155	0.769945	0.508963	0	Very High	Very Low	Very Low	Very Low	Very Low	Very Low	Very Low	Low	High	Moderate	Very Low	Very High	11.9889	0	0	0	0	0	0	0.225247	1.85829	0.844676	0	Very High	Very Low	Very Low	Very Low	Very Low	Very Low	Very Low	Low	Very High	Very High	Very Low	Very High	Very High	0
17370028	GB112073071400	0.582396	0	0	0	0	0	0	0	0.557525	0.139809	0	Moderate	Very Low	Very Low	Very Low	Very Low	Very Low	Very Low	Very Low	Moderate	Very Low	Very Low	Moderate	2.27545	0	0	0	0	0	0	0	1.99102	0.162532	0	Very High	Very Low	Very Low	Very Low	Very Low	Very Low	Very Low	Very Low	Very High	Very Low	Very Low	Very High	Very High	0
17370030	GB112073071400	0.105332	0	0	0	0	0	0	0.148606	0.100834	0	0	Very Low	Very Low	Very Low	Very Low	Very Low	Very Low	Very Low	Very Low	Very Low	Very Low	Very Low	Very Low	1.87011	0	0	0	0	0	0	0.174544	1.63635	0	0	Very High	Very Low	Very Low	Very Low	Very Low	Very Low	Very Low	Very Low	Very High	Very Low	Very Low	Very High	Very High	0
17370032	GB31247007	1	0	0	0	0	0	0	1	1	1	0	Very High	Very Low	Very Low	Very Low	Very Low	Very Low	Very Low	Very High	Very High	Very High	Very Low	Very High	0.200005	0	0	0	0	0	0	0.0186672	0.175005	0.0142861	0	Low	Very Low	Very Low	Very Low	Very Low	Very Low	Very Low	Very Low	Very Low	Very Low	Very Low	Low	Very High	4
17370035	GB112073071210	0.77411	0	0	0	0	0	0	0.242336	0.74991	0.196646	0	High	Very Low	Very Low	Very Low	Very Low	Very Low	Very Low	Low	High	Very Low	Very Low	High	3.42693	0	0	0	0	0	0	0.319847	2.99857	0.244781	0	Very High	Very Low	Very Low	Very Low	Very Low	Very Low	Very Low	Low	Very High	Low	Very Low	Very High	Very High	0
17370039	GB112073071200	0.23865	0	0	0	0	0	0	0	0.21524	0	0	Low	Very Low	Very Low	Very Low	Very Low	Very Low	Very Low	Very Low	Low	Very Low	Very Low	Low	0.313457	0	0	0	0	0	0	0	0.274275	0	0	Low	Very Low	Very Low	Very Low	Very Low	Very Low	Very Low	Very Low	Low	Very Low	Very Low	Low	Low	0
17370051	GB112073071150	0.671167	0	0	0	0	0	0	0	0.741695	0	0	High	Very Low	Very Low	Very Low	Very Low	Very Low	Very Low	Very Low	High	Very Low	Very Low	High	6.94967	0	0	0	0	0	0	0	6.08096	0	0	Very High	Very Low	Very Low	Very Low	Very Low	Very Low	Very Low	Very Low	Very High	Very Low	Very Low	Very High	Very High	0
17370051	GB641211171000	0.00321574	0	0	0	0	0	0	0	0.00404719	0	0	Very Low	Very Low	Very Low	Very Low	Very Low	Very Low	Very Low	Very Low	Very Low	Very Low	Very Low	Very Low	6.94967	0	0	0	0	0	0	0	6.08096	0	0	Very High	Very Low	Very Low	Very Low	Very Low	Very Low	Very Low	Very Low	Very High	Very Low	Very Low	Very High	Very High	2
17370061	GB112073071380	0.853653	0	0	0	0	0	0	0.352508	0.836171	0	0	Very High	Very Low	Very Low	Very Low	Very Low	Very Low	Very Low	Low	Very High	Very Low	Very Low	Very High	5.83307	0	0	0	0	0	0	0.54442	5.10394	0	0	Very High	Very Low	Very Low	Very Low	Very Low	Very Low	Very Low	Moderate	Very High	Very Low	Very Low	Very High	Very High	0
17370069	GB112073071080	0.0126989	0	0	0	0	0	0	0.00119903	0.0111292	0	0	Very Low	Very Low	Very Low	Very Low	Very Low	Very Low	Very Low	Very Low	Very Low	Very Low	Very Low	Very Low	0.0128622	0	0	0	0	0	0	0.00120047	0.0112544	0	0	Very Low	Very Low	Very Low	Very Low	Very Low	Very Low	Very Low	Very Low	Very Low	Very Low	Very Low	Very Low	Very Low	0
17370073	GB112073071440	0.471304	0	0	0	0	0	0	0.0768108	0.438207	0	0	Moderate	Very Low	Very Low	Very Low	Very Low	Very Low	Very Low	Very Low	Moderate	Very Low	Very Low	Moderate	1.16665	0	0	0	0	0	0	0.108887	1.02082	0	0	Very High	Very Low	Very Low	Very Low	Very Low	Very Low	Very Low	Very Low	Very High	Very Low	Very Low	Very High	Very High	0
17370073	GB531207312000	0.0220328	0	0	0	0	0	0	0.00909351	0.0196813	0	0	Very Low	Very Low	Very Low	Very Low	Very Low	Very Low	Very Low	Very Low	Very Low	Very Low	Very Low	Very Low	1.16665	0	0	0	0	0	0	0.108887	1.02082	0	0	Very High	Very Low	Very Low	Very Low	Very Low	Very Low	Very Low	Very Low	Very High	Very Low	Very Low	Very High	Very High	1
17370074	GB531207312000	0.0065519	0	0	0	0	0	0	0.000811242	0.00975441	0	0	Very Low	Very Low	Very Low	Very Low	Very Low	Very Low	Very Low	Very Low	Very Low	Very Low	Very Low	Very Low	1.07649	0	0	0	0	0	0	0.100472	0.941924	0	0	Very High	Very Low	Very Low	Very Low	Very Low	Very Low	Very Low	Very Low	Very High	Very Low	Very Low	Very High	Very High	1
17370075	GB112073064430	0.0510747	0	0	0	0	0	0	0.0358954	0.0809325	0	0	Very Low	Very Low	Very Low	Very Low	Very Low	Very Low	Very Low	Very Low	Very Low	Very Low	Very Low	Very Low	2.60379	0	0	0	0	0	0	0.24302	2.27832	0	0	Very High	Very Low	Very Low	Very Low	Very Low	Very Low	Very Low	Low	Very High	Very Low	Very Low	Very High	Very High	0
17370080	GB112073071420	0	0	0	0	0	0	0	0	0	0	0	Very Low	Very Low	Very Low	Very Low	Very Low	Very Low	Very Low	Very Low	Very Low	Very Low	Very Low	Very Low	NA	NA	NA	NA	NA	NA	NA	NA	NA	NA	NA	NA	NA	NA	NA	NA	NA	NA	NA	NA	NA	NA	NA	Very Low	4
17370081	GB112072065980	0.467661	0	0	0	0	0	0	0.310504	0.57069	0	0	Moderate	Very Low	Very Low	Very Low	Very Low	Very Low	Very Low	Low	Moderate	Very Low	Very Low	Moderate	2.37553	0	0	0	0	0	0	0.221716	2.07859	0	0	Very High	Very Low	Very Low	Very Low	Very Low	Very Low	Very Low	Low	Very High	Very Low	Very Low	Very High	Very High	0
17370081	GB112073064430	0.92931	0	0	0	0	0	0	0.816399	0.883545	0	0	Very High	Very Low	Very Low	Very Low	Very Low	Very Low	Very Low	Very High	Very High	Very Low	Very Low	Very High	2.37553	0	0	0	0	0	0	0.221716	2.07859	0	0	Very High	Very Low	Very Low	Very Low	Very Low	Very Low	Very Low	Low	Very High	Very Low	Very Low	Very High	Very High	0
17370081	GB531207312000	0.0629764	0	0	0	0	0	0	0.009747	0.0562552	0	0	Very Low	Very Low	Very Low	Very Low	Very Low	Very Low	Very Low	Very Low	Very Low	Very Low	Very Low	Very Low	2.37553	0	0	0	0	0	0	0.221716	2.07859	0	0	Very High	Very Low	Very Low	Very Low	Very Low	Very Low	Very Low	Low	Very High	Very Low	Very Low	Very High	Very High	1
17370083	GB112073071070	1	0	0	0	0	0	0	1	1	0	0	Very High	Very Low	Very Low	Very Low	Very Low	Very Low	Very Low	Very High	Very High	Very Low	Very Low	Very High	2.22156	0	0	0	0	0	0	0.207346	1.94387	0	0	Very High	Very Low	Very Low	Very Low	Very Low	Very Low	Very Low	Low	Very High	Very Low	Very Low	Very High	Very High	0
17370083	GB531207312000	0.0451179	0	0	0	0	0	0	0.00966877	0.0413361	0	0	Very Low	Very Low	Very Low	Very Low	Very Low	Very Low	Very Low	Very Low	Very Low	Very Low	Very Low	Very Low	2.22156	0	0	0	0	0	0	0.207346	1.94387	0	0	Very High	Very Low	Very Low	Very Low	Very Low	Very Low	Very Low	Low	Very High	Very Low	Very Low	Very High	Very High	1
17370100	GB112073071460	0.822023	0	0	0	0	0	0	0.079847	0.417216	0.245516	0	Very High	Very Low	Very Low	Very Low	Very Low	Very Low	Very Low	Very Low	Moderate	Low	Very Low	Very High	4.61871	0	0	0	0	0	0	0.0867758	0.715901	0.325409	0	Very High	Very Low	Very Low	Very Low	Very Low	Very Low	Very Low	Very Low	High	Low	Very Low	Very High	Very High	0
17370128	GB112073071270	1	0	0	0	0	0	0	0	1	0	0	Very High	Very Low	Very Low	Very Low	Very Low	Very Low	Very Low	Very Low	Very High	Very Low	Very Low	Very High	8.72354	0	0	0	0	0	0	0	7.6331	0	0	Very High	Very Low	Very Low	Very Low	Very Low	Very Low	Very Low	Very Low	Very High	Very Low	Very Low	Very High	Very High	0
17370128	GB531207311900	0.000641268	0	0	0	0	0	0	0	0.000871652	0	0	Very Low	Very Low	Very Low	Very Low	Very Low	Very Low	Very Low	Very Low	Very Low	Very Low	Very Low	Very Low	8.72354	0	0	0	0	0	0	0	7.6331	0	0	Very High	Very Low	Very Low	Very Low	Very Low	Very Low	Very Low	Very Low	Very High	Very Low	Very Low	Very High	Very High	0
17370128	GB531207312000	0.101815	0	0	0	0	0	0	0	0.0909491	0	0	Very Low	Very Low	Very Low	Very Low	Very Low	Very Low	Very Low	Very Low	Very Low	Very Low	Very Low	Very Low	8.72354	0	0	0	0	0	0	0	7.6331	0	0	Very High	Very Low	Very Low	Very Low	Very Low	Very Low	Very Low	Very Low	Very High	Very Low	Very Low	Very High	Very High	1
17370138	GB112073071050	0.0244899	0	0	0	0	0	0	0.0144202	0.0267911	0	0	Very Low	Very Low	Very Low	Very Low	Very Low	Very Low	Very Low	Very Low	Very Low	Very Low	Very Low	Very Low	0.510342	0	0	0	0	0	0	0.0476319	0.446549	0	0	Moderate	Very Low	Very Low	Very Low	Very Low	Very Low	Very Low	Very Low	Moderate	Very Low	Very Low	Moderate	Moderate	0
17370179	GB112073071160	0.35338	0.00218125	0	0	0	0	0	0.179387	0.267043	0	0	Low	Very Low	Very Low	Very Low	Very Low	Very Low	Very Low	Very Low	Low	Very Low	Very Low	Low	0.46314	0.0790727	0	0	0	0	0	0.0432264	0.405248	0	0	Moderate	Very Low	Very Low	Very Low	Very Low	Very Low	Very Low	Very Low	Moderate	Very Low	Very Low	Moderate	Moderate	0
17370179	GB531207311900	0.281461	0.0628901	0	0	0	0	0	0.0353889	0.255053	0	0	Low	Very Low	Very Low	Very Low	Very Low	Very Low	Very Low	Very Low	Low	Very Low	Very Low	Low	0.46314	0.0790727	0	0	0	0	0	0.0432264	0.405248	0	0	Moderate	Very Low	Very Low	Very Low	Very Low	Very Low	Very Low	Very Low	Moderate	Very Low	Very Low	Moderate	Moderate	0
17380262	GB112073071190	0.726894	0	0	0	0	0	0	0.198984	0.699599	0	0	High	Very Low	Very Low	Very Low	Very Low	Very Low	Very Low	Very Low	High	Very Low	Very Low	High	2.66158	0	0	0	0	0	0	0.248414	2.32888	0	0	Very High	Very Low	Very Low	Very Low	Very Low	Very Low	Very Low	Low	Very High	Very Low	Very Low	Very High	Very High	0
17380300	GB112073071120	0	0	0	0	0	0	0	0	0	0	0	Very Low	Very Low	Very Low	Very Low	Very Low	Very Low	Very Low	Very Low	Very Low	Very Low	Very Low	Very Low	NA	NA	NA	NA	NA	NA	NA	NA	NA	NA	NA	NA	NA	NA	NA	NA	NA	NA	NA	NA	NA	NA	NA	Very Low	0
17470020	GB531207411800	0.302755	0	0	0	0	0	0	0	0.277314	0	0	Low	Very Low	Very Low	Very Low	Very Low	Very Low	Very Low	Very Low	Low	Very Low	Very Low	Low	1.7484	0	0	0	0	0	0	0	1.52985	0	0	Very High	Very Low	Very Low	Very Low	Very Low	Very Low	Very Low	Very Low	Very High	Very Low	Very Low	Very High	Very High	0
17470024	GB112074070020	0.0819996	0	0	0	0	0	0	0.00826799	0.0724927	0	0	Very Low	Very Low	Very Low	Very Low	Very Low	Very Low	Very Low	Very Low	Very Low	Very Low	Very Low	Very Low	0.385243	0	0	0	0	0	0	0.035956	0.337087	0	0	Low	Very Low	Very Low	Very Low	Very Low	Very Low	Very Low	Very Low	Low	Very Low	Very Low	Low	Low	0
17470024	GB112075070540	0.0305034	0	0	0	0	0	0	0.00664069	0.0286369	0	0	Very Low	Very Low	Very Low	Very Low	Very Low	Very Low	Very Low	Very Low	Very Low	Very Low	Very Low	Very Low	0.385243	0	0	0	0	0	0	0.035956	0.337087	0	0	Low	Very Low	Very Low	Very Low	Very Low	Very Low	Very Low	Very Low	Low	Very Low	Very Low	Low	Low	0
17470025	GB112070064952	0.00584866	0	0	0	0	0	0	0.00659133	0.0130906	1	0	Very Low	Very Low	Very Low	Very Low	Very Low	Very Low	Very Low	Very Low	Very Low	Very High	Very Low	Very High	1.72309	0	0	0	0	0	0	0.160822	1.5077	0.123078	0	Very High	Very Low	Very Low	Very Low	Very Low	Very Low	Very Low	Very Low	Very High	Very Low	Very Low	Very High	Very High	0
17470025	GB112074069990	0.00224797	0	0	0	0	0	0	1	0.00299504	1	0	Very Low	Very Low	Very Low	Very Low	Very Low	Very Low	Very Low	Very High	Very Low	Very High	Very Low	Very High	1.72309	0	0	0	0	0	0	0.160822	1.5077	0.123078	0	Very High	Very Low	Very Low	Very Low	Very Low	Very Low	Very Low	Very Low	Very High	Very Low	Very Low	Very High	Very High	0
17470025	GB112074070000	0.545397	0	0	0	0	0	0	0.100698	0.512137	0.0789305	0	Moderate	Very Low	Very Low	Very Low	Very Low	Very Low	Very Low	Very Low	Moderate	Very Low	Very Low	Moderate	1.72309	0	0	0	0	0	0	0.160822	1.5077	0.123078	0	Very High	Very Low	Very Low	Very Low	Very Low	Very Low	Very Low	Very Low	Very High	Very Low	Very Low	Very High	Very High	0
17470025	GB112074070010	0.835444	0	0	0	0	0	0	1	0.85586	1	0	Very High	Very Low	Very Low	Very Low	Very Low	Very Low	Very Low	Very High	Very High	Very High	Very Low	Very High	1.72309	0	0	0	0	0	0	0.160822	1.5077	0.123078	0	Very High	Very Low	Very Low	Very Low	Very Low	Very Low	Very Low	Very Low	Very High	Very Low	Very Low	Very High	Very High	0
17470029	GB112074070010	0.00324034	0	0	0	0	0	0	0	0.00248964	0	0	Very Low	Very Low	Very Low	Very Low	Very Low	Very Low	Very Low	Very Low	Very Low	Very Low	Very Low	Very Low	0.0200869	0	0	0	0	0	0	0	0.017576	0	0	Very Low	Very Low	Very Low	Very Low	Very Low	Very Low	Very Low	Very Low	Very Low	Very Low	Very Low	Very Low	Very Low	0
17470034	GB112074069730	0.343449	0	0	0	0	0	0	0	0.313998	0	0	Low	Very Low	Very Low	Very Low	Very Low	Very Low	Very Low	Very Low	Low	Very Low	Very Low	Low	0.52311	0	0	0	0	0	0	0	0.457721	0	0	Moderate	Very Low	Very Low	Very Low	Very Low	Very Low	Very Low	Very Low	Moderate	Very Low	Very Low	Moderate	Moderate	0
17470038	GB112074070040	0.00020402	0	0	0	0	0	0	0	0.000183611	0	0	Very Low	Very Low	Very Low	Very Low	Very Low	Very Low	Very Low	Very Low	Very Low	Very Low	Very Low	Very Low	0.0940016	0	0	0	0	0	0	0	0.0822514	0	0	Very Low	Very Low	Very Low	Very Low	Very Low	Very Low	Very Low	Very Low	Very Low	Very Low	Very Low	Very Low	Very Low	0
17470040	GB112074070090	0.0111612	0	0	0	0	0	0	0.00105237	0.00977974	0	0	Very Low	Very Low	Very Low	Very Low	Very Low	Very Low	Very Low	Very Low	Very Low	Very Low	Very Low	Very Low	0.0112872	0	0	0	0	0	0	0.00105347	0.00987633	0	0	Very Low	Very Low	Very Low	Very Low	Very Low	Very Low	Very Low	Very Low	Very Low	Very Low	Very Low	Very Low	Very Low	0
17470043	GB112074069720	0.110324	0	0	0	0	0	0	0.0114413	0.097883	0	0	Very Low	Very Low	Very Low	Very Low	Very Low	Very Low	Very Low	Very Low	Very Low	Very Low	Very Low	Very Low	0.124004	0	0	0	0	0	0	0.0115737	0.108504	0	0	Very Low	Very Low	Very Low	Very Low	Very Low	Very Low	Very Low	Very Low	Very Low	Very Low	Very Low	Very Low	Very Low	0
17470048	GB531207411800	0.00305708	0	0	0	0	0	0	0	0.00280018	0	0	Very Low	Very Low	Very Low	Very Low	Very Low	Very Low	Very Low	Very Low	Very Low	Very Low	Very Low	Very Low	1.45356	0	0	0	0	0	0	0	1.27187	0	0	Very High	Very Low	Very Low	Very Low	Very Low	Very Low	Very Low	Very Low	Very High	Very Low	Very Low	Very High	Very High	0
17470048	GB641211172000	0.179261	0	0	0	0	0	0	0	0.273293	0	0	Very Low	Very Low	Very Low	Very Low	Very Low	Very Low	Very Low	Very Low	Low	Very Low	Very Low	Low	1.45356	0	0	0	0	0	0	0	1.27187	0	0	Very High	Very Low	Very Low	Very Low	Very Low	Very Low	Very Low	Very Low	Very High	Very Low	Very Low	Very High	Very High	1
17470074	GB531207408400	0.2875	0	0	0	0	0	0	0	0.26094	0	0	Low	Very Low	Very Low	Very Low	Very Low	Very Low	Very Low	Very Low	Low	Very Low	Very Low	Low	0.403509	0	0	0	0	0	0	0	0.353071	0	0	Moderate	Very Low	Very Low	Very Low	Very Low	Very Low	Very Low	Very Low	Low	Very Low	Very Low	Moderate	Moderate	0
17470136	GB641211172000	0.151081	0	0	0	0	0	0	0	0.230332	0	0	Very Low	Very Low	Very Low	Very Low	Very Low	Very Low	Very Low	Very Low	Low	Very Low	Very Low	Low	3.77373	0	0	0	0	0	0	0	3.30201	0	0	Very High	Very Low	Very Low	Very Low	Very Low	Very Low	Very Low	Very Low	Very High	Very Low	Very Low	Very High	Very High	1
17470152	GB112068060530	0	0	0	0	0	0	0	0	0	0	0	Very Low	Very Low	Very Low	Very Low	Very Low	Very Low	Very Low	Very Low	Very Low	Very Low	Very Low	Very Low	0.587391	0	0	0	0	0	0	0	0.513968	0	0	Moderate	Very Low	Very Low	Very Low	Very Low	Very Low	Very Low	Very Low	Moderate	Very Low	Very Low	Moderate	Moderate	0
17470152	GB112074069980	1	0	0	0	0	0	0	0	1	0	0	Very High	Very Low	Very Low	Very Low	Very Low	Very Low	Very Low	Very Low	Very High	Very Low	Very Low	Very High	0.587391	0	0	0	0	0	0	0	0.513968	0	0	Moderate	Very Low	Very Low	Very Low	Very Low	Very Low	Very Low	Very Low	Moderate	Very Low	Very Low	Moderate	Very High	0
17470152	GB112074069990	0.997752	0	0	0	0	0	0	0	0.997005	0	0	Very High	Very Low	Very Low	Very Low	Very Low	Very Low	Very Low	Very Low	Very High	Very Low	Very Low	Very High	0.587391	0	0	0	0	0	0	0	0.513968	0	0	Moderate	Very Low	Very Low	Very Low	Very Low	Very Low	Very Low	Very Low	Moderate	Very Low	Very Low	Moderate	Very High	0
17470160	GB641211171000	2.4e-05	0	0	0	0	0	0	0	3.02e-05	0	0	Very Low	Very Low	Very Low	Very Low	Very Low	Very Low	Very Low	Very Low	Very Low	Very Low	Very Low	Very Low	0.0866361	0	0	0	0	0	0	0	0.0758066	0	0	Very Low	Very Low	Very Low	Very Low	Very Low	Very Low	Very Low	Very Low	Very Low	Very Low	Very Low	Very Low	Very Low	2
17470166	GB112069061452	0.00134142	0	0	0	0	0	0	0	0.000527474	0	0	Very Low	Very Low	Very Low	Very Low	Very Low	Very Low	Very Low	Very Low	Very Low	Very Low	Very Low	Very Low	1.71673	0	0	0	0	0	0	0	1.50214	0	0	Very High	Very Low	Very Low	Very Low	Very Low	Very Low	Very Low	Very Low	Very High	Very Low	Very Low	Very High	Very High	0
17470166	GB112073071150	0.203414	0	0	0	0	0	0	0	0.0999063	0	0	Low	Very Low	Very Low	Very Low	Very Low	Very Low	Very Low	Very Low	Very Low	Very Low	Very Low	Low	1.71673	0	0	0	0	0	0	0	1.50214	0	0	Very High	Very Low	Very Low	Very Low	Very Low	Very Low	Very Low	Very Low	Very High	Very Low	Very Low	Very High	Very High	0
17470166	GB112074069790	1	0	0	0	0	0	0	0	1	0	0	Very High	Very Low	Very Low	Very Low	Very Low	Very Low	Very Low	Very Low	Very High	Very Low	Very Low	Very High	1.71673	0	0	0	0	0	0	0	1.50214	0	0	Very High	Very Low	Very Low	Very Low	Very Low	Very Low	Very Low	Very Low	Very High	Very Low	Very Low	Very High	Very High	0
17470166	GB641211171000	0.0881226	0	0	0	0	0	0	0	0.0492921	0	0	Very Low	Very Low	Very Low	Very Low	Very Low	Very Low	Very Low	Very Low	Very Low	Very Low	Very Low	Very Low	1.71673	0	0	0	0	0	0	0	1.50214	0	0	Very High	Very Low	Very Low	Very Low	Very Low	Very Low	Very Low	Very Low	Very High	Very Low	Very Low	Very High	Very High	2
17470166	GB641211172000	0.629623	0	0	0	0	0	0	0	0.42662	0	0	High	Very Low	Very Low	Very Low	Very Low	Very Low	Very Low	Very Low	Moderate	Very Low	Very Low	High	1.71673	0	0	0	0	0	0	0	1.50214	0	0	Very High	Very Low	Very Low	Very Low	Very Low	Very Low	Very Low	Very Low	Very High	Very Low	Very Low	Very High	Very High	1
17470181	GB531207411800	0	0	0	0	0	0	0	0	0	0	0	Very Low	Very Low	Very Low	Very Low	Very Low	Very Low	Very Low	Very Low	Very Low	Very Low	Very Low	Very Low	NA	NA	NA	NA	NA	NA	NA	NA	NA	NA	NA	NA	NA	NA	NA	NA	NA	NA	NA	NA	NA	NA	NA	Very Low	0
17470187	GB531207411800	0.051997	0	0	0	0	0	0	0	0.0476276	0	0	Very Low	Very Low	Very Low	Very Low	Very Low	Very Low	Very Low	Very Low	Very Low	Very Low	Very Low	Very Low	0.382306	0	0	0	0	0	0	0	0.334518	0	0	Low	Very Low	Very Low	Very Low	Very Low	Very Low	Very Low	Very Low	Low	Very Low	Very Low	Low	Low	0
17470188	GB641211630002	0.00456459	0	0	0	0	0	0	0	0.00405637	0	0	Very Low	Very Low	Very Low	Very Low	Very Low	Very Low	Very Low	Very Low	Very Low	Very Low	Very Low	Very Low	0.342408	0	0	0	0	0	0	0	0.299607	0	0	Low	Very Low	Very Low	Very Low	Very Low	Very Low	Very Low	Very Low	Low	Very Low	Very Low	Low	Low	6
17480324	GB641211630002	0.1184	0	0	0	0	0	0	0	0.105217	0	0	Very Low	Very Low	Very Low	Very Low	Very Low	Very Low	Very Low	Very Low	Very Low	Very Low	Very Low	Very Low	0.694646	0	0	0	0	0	0	0	0.607815	0	0	High	Very Low	Very Low	Very Low	Very Low	Very Low	Very Low	Very Low	High	Very Low	Very Low	High	High	6
17480351	GB112074070030	1	0	0	0	0	0	0	0	1	0	0	Very High	Very Low	Very Low	Very Low	Very Low	Very Low	Very Low	Very Low	Very High	Very Low	Very Low	Very High	0.994564	0	0	0	0	0	0	0	0.870244	0	0	Very High	Very Low	Very Low	Very Low	Very Low	Very Low	Very Low	Very Low	Very High	Very Low	Very Low	Very High	Very High	0
17480351	GB112074070040	0.997626	0	0	0	0	0	0	0	0.997584	0	0	Very High	Very Low	Very Low	Very Low	Very Low	Very Low	Very Low	Very Low	Very High	Very Low	Very Low	Very High	0.994564	0	0	0	0	0	0	0	0.870244	0	0	Very High	Very Low	Very Low	Very Low	Very Low	Very Low	Very Low	Very Low	Very High	Very Low	Very Low	Very High	Very High	0
17480351	GB641211630003	0.0151434	0	0	0	0	0	0	0	0.0139151	0	0	Very Low	Very Low	Very Low	Very Low	Very Low	Very Low	Very Low	Very Low	Very Low	Very Low	Very Low	Very Low	0.994564	0	0	0	0	0	0	0	0.870244	0	0	Very High	Very Low	Very Low	Very Low	Very Low	Very Low	Very Low	Very Low	Very High	Very Low	Very Low	Very High	Very High	2
17570006	GB530207614700	0.0312741	0	0	0	0	0	0	0	0.0193296	0	0	Very Low	Very Low	Very Low	Very Low	Very Low	Very Low	Very Low	Very Low	Very Low	Very Low	Very Low	Very Low	0.120856	0	0	0	0	0	0	0	0.105749	0	0	Very Low	Very Low	Very Low	Very Low	Very Low	Very Low	Very Low	Very Low	Very Low	Very Low	Very Low	Very Low	Very Low	1
17570012	GB102075073440	0.0937255	0	0	0	0	0	0	0	0.108717	0	0	Very Low	Very Low	Very Low	Very Low	Very Low	Very Low	Very Low	Very Low	Very Low	Very Low	Very Low	Very Low	0.946112	0	0	0	0	0	0	0	0.827848	0	0	Very High	Very Low	Very Low	Very Low	Very Low	Very Low	Very Low	Very Low	Very High	Very Low	Very Low	Very High	Very High	0
17570013	GB102075073440	0.344184	0	0	0	0	0	0	0	0.266157	0	0	Low	Very Low	Very Low	Very Low	Very Low	Very Low	Very Low	Very Low	Low	Very Low	Very Low	Low	1.39216	0	0	0	0	0	0	0	1.21814	0	0	Very High	Very Low	Very Low	Very Low	Very Low	Very Low	Very Low	Very Low	Very High	Very Low	Very Low	Very High	Very High	0
17570013	GB102075073480	0.222574	0	0	0	0	0	0	0	0.181736	0	0	Low	Very Low	Very Low	Very Low	Very Low	Very Low	Very Low	Very Low	Very Low	Very Low	Very Low	Low	1.39216	0	0	0	0	0	0	0	1.21814	0	0	Very High	Very Low	Very Low	Very Low	Very Low	Very Low	Very Low	Very Low	Very High	Very Low	Very Low	Very High	Very High	0
17570013	GB102075073490	1	0	0	0	0	0	0	0	1	0	0	Very High	Very Low	Very Low	Very Low	Very Low	Very Low	Very Low	Very Low	Very High	Very Low	Very Low	Very High	1.39216	0	0	0	0	0	0	0	1.21814	0	0	Very High	Very Low	Very Low	Very Low	Very Low	Very Low	Very Low	Very Low	Very High	Very Low	Very Low	Very High	Very High	0
17570014	GB102075073480	0.304499	0	0	0	0	0	0	0	0.331506	0	0	Low	Very Low	Very Low	Very Low	Very Low	Very Low	Very Low	Very Low	Low	Very Low	Very Low	Low	2.08449	0	0	0	0	0	0	0	1.82393	0	0	Very High	Very Low	Very Low	Very Low	Very Low	Very Low	Very Low	Very Low	Very High	Very Low	Very Low	Very High	Very High	0
17570018	GB102075073410	0.61941	0	0	0	0	0	0	0.131869	0.587469	0	0	High	Very Low	Very Low	Very Low	Very Low	Very Low	Very Low	Very Low	Moderate	Very Low	Very Low	High	1.6275	0	0	0	0	0	0	0.1519	1.42406	0	0	Very High	Very Low	Very Low	Very Low	Very Low	Very Low	Very Low	Very Low	Very High	Very Low	Very Low	Very High	Very High	0
17570019	GB102075073390	1	0	0	0	0	0	0	0	1	1	0	Very High	Very Low	Very Low	Very Low	Very Low	Very Low	Very Low	Very Low	Very High	Very High	Very Low	Very High	0.701839	0	0	0	0	0	0	0	0.614109	0.0501313	0	High	Very Low	Very Low	Very Low	Very Low	Very Low	Very Low	Very Low	High	Very Low	Very Low	High	Very High	0
17570019	GB102075073440	0.076041	0	0	0	0	0	0	0	0.0740477	1	0	Very Low	Very Low	Very Low	Very Low	Very Low	Very Low	Very Low	Very Low	Very Low	Very High	Very Low	Very High	0.701839	0	0	0	0	0	0	0	0.614109	0.0501313	0	High	Very Low	Very Low	Very Low	Very Low	Very Low	Very Low	Very Low	High	Very Low	Very Low	High	Very High	0
17570019	GB102075073460	0.279025	0	0	0	0	0	0	0	0.253025	0.0279859	0	Low	Very Low	Very Low	Very Low	Very Low	Very Low	Very Low	Very Low	Low	Very Low	Very Low	Low	0.701839	0	0	0	0	0	0	0	0.614109	0.0501313	0	High	Very Low	Very Low	Very Low	Very Low	Very Low	Very Low	Very Low	High	Very Low	Very Low	High	High	0
17570022	GB112075070530	0.0408071	0	0	0	0	0	0	0.00395499	0.0358893	0	0	Very Low	Very Low	Very Low	Very Low	Very Low	Very Low	Very Low	Very Low	Very Low	Very Low	Very Low	Very Low	0.0425431	0	0	0	0	0	0	0.00397069	0.0372253	0	0	Very Low	Very Low	Very Low	Very Low	Very Low	Very Low	Very Low	Very Low	Very Low	Very Low	Very Low	Very Low	Very Low	0
17570023	GB112075073562	0.275752	0	0	0	0	0	0	0.0343164	0.249896	0	0	Low	Very Low	Very Low	Very Low	Very Low	Very Low	Very Low	Very Low	Low	Very Low	Very Low	Low	0.380742	0	0	0	0	0	0	0.0355359	0.333149	0	0	Low	Very Low	Very Low	Very Low	Very Low	Very Low	Very Low	Very Low	Low	Very Low	Very Low	Low	Low	0
17570025	GB112075070540	0.248805	0	0	0	0	0	0	0.0902758	0.23358	0	0	Low	Very Low	Very Low	Very Low	Very Low	Very Low	Very Low	Very Low	Low	Very Low	Very Low	Low	1.1055	0	0	0	0	0	0	0.10318	0.967311	0	0	Very High	Very Low	Very Low	Very Low	Very Low	Very Low	Very Low	Very Low	Very High	Very Low	Very Low	Very High	Very High	0
17570026	GB112075073570	0.0105458	0	0	0	0	0	0	0.00106727	0.0108498	0	0	Very Low	Very Low	Very Low	Very Low	Very Low	Very Low	Very Low	Very Low	Very Low	Very Low	Very Low	Very Low	0.0774397	0	0	0	0	0	0	0.00722771	0.0677597	0	0	Very Low	Very Low	Very Low	Very Low	Very Low	Very Low	Very Low	Very Low	Very Low	Very Low	Very Low	Very Low	Very Low	0
17570030	GB112075070520	8.71e-05	0	0	0	0	0	0	0	7.38e-05	0	0	Very Low	Very Low	Very Low	Very Low	Very Low	Very Low	Very Low	Very Low	Very Low	Very Low	Very Low	Very Low	0.055252	0	0	0	0	0	0	0	0.0483455	0	0	Very Low	Very Low	Very Low	Very Low	Very Low	Very Low	Very Low	Very Low	Very Low	Very Low	Very Low	Very Low	Very Low	0
17570031	GB112075070390	0	0	0	0	0	0	0	0	0	0	0	Very Low	Very Low	Very Low	Very Low	Very Low	Very Low	Very Low	Very Low	Very Low	Very Low	Very Low	Very Low	3.59023	0	0	0	0	0	0	0.335088	3.14145	0.256445	0	Very High	Very Low	Very Low	Very Low	Very Low	Very Low	Very Low	Low	Very High	Low	Very Low	Very High	Very High	0
17570031	GB112075070520	0.311614	0	0	0	0	0	0	0.137934	0.424013	0.204103	0	Low	Very Low	Very Low	Very Low	Very Low	Very Low	Very Low	Very Low	Moderate	Low	Very Low	Moderate	3.59023	0	0	0	0	0	0	0.335088	3.14145	0.256445	0	Very High	Very Low	Very Low	Very Low	Very Low	Very Low	Very Low	Low	Very High	Low	Very Low	Very High	Very High	0
17570035	GB112075073570	0.0829513	0	0	0	0	0	0	0.0179092	0.0682738	0	0	Very Low	Very Low	Very Low	Very Low	Very Low	Very Low	Very Low	Very Low	Very Low	Very Low	Very Low	Very Low	0.230253	0	0	0	0	0	0	0.0214903	0.201472	0	0	Low	Very Low	Very Low	Very Low	Very Low	Very Low	Very Low	Very Low	Low	Very Low	Very Low	Low	Low	0
17570036	GB112075070500	0.0401906	0	0	0	0	0	0	0.0605481	0.0388104	0	0	Very Low	Very Low	Very Low	Very Low	Very Low	Very Low	Very Low	Very Low	Very Low	Very Low	Very Low	Very Low	0.69054	0	0	0	0	0	0	0.0644504	0.604223	0	0	High	Very Low	Very Low	Very Low	Very Low	Very Low	Very Low	Very Low	High	Very Low	Very Low	High	High	0
17570037	GB112075070400	0.473518	0	0	0	0	0	0	0.0781016	0.440706	0	0	Moderate	Very Low	Very Low	Very Low	Very Low	Very Low	Very Low	Very Low	Moderate	Very Low	Very Low	Moderate	1.97955	0	0	0	0	0	0	0.184758	1.7321	0	0	Very High	Very Low	Very Low	Very Low	Very Low	Very Low	Very Low	Very Low	Very High	Very Low	Very Low	Very High	Very High	0
17570037	GB112075070540	0.129043	0	0	0	0	0	0	0.028093	0.121147	0	0	Very Low	Very Low	Very Low	Very Low	Very Low	Very Low	Very Low	Very Low	Very Low	Very Low	Very Low	Very Low	1.97955	0	0	0	0	0	0	0.184758	1.7321	0	0	Very High	Very Low	Very Low	Very Low	Very Low	Very Low	Very Low	Very Low	Very High	Very Low	Very Low	Very High	Very High	0
17570038	GB112075070500	0.710872	0	0	0	0	0	0	0	0.68646	0	0	High	Very Low	Very Low	Very Low	Very Low	Very Low	Very Low	Very Low	High	Very Low	Very Low	High	3.727	0	0	0	0	0	0	0	3.26112	0	0	Very High	Very Low	Very Low	Very Low	Very Low	Very Low	Very Low	Very Low	Very High	Very Low	Very Low	Very High	Very High	0
17570040	GB112075070410	0.33901	0	0	0	0	0	0	0	0.309761	0	0	Low	Very Low	Very Low	Very Low	Very Low	Very Low	Very Low	Very Low	Low	Very Low	Very Low	Low	0.512883	0	0	0	0	0	0	0	0.448773	0	0	Moderate	Very Low	Very Low	Very Low	Very Low	Very Low	Very Low	Very Low	Moderate	Very Low	Very Low	Moderate	Moderate	0
17570041	GB112075070520	0.0183526	0	0	0	0	0	0	0.0483961	0.0194229	0	0	Very Low	Very Low	Very Low	Very Low	Very Low	Very Low	Very Low	Very Low	Very Low	Very Low	Very Low	Very Low	1.67938	0	0	0	0	0	0	0.156742	1.46946	0	0	Very High	Very Low	Very Low	Very Low	Very Low	Very Low	Very Low	Very Low	Very High	Very Low	Very Low	Very High	Very High	0
17570042	GB112075070520	0	0	0	0	0	0	0	0	0	0	0	Very Low	Very Low	Very Low	Very Low	Very Low	Very Low	Very Low	Very Low	Very Low	Very Low	Very Low	Very Low	NA	NA	NA	NA	NA	NA	NA	NA	NA	NA	NA	NA	NA	NA	NA	NA	NA	NA	NA	NA	NA	NA	NA	Very Low	0
17570043	GB112075070520	0.0027104	0	0	0	0	0	0	0.00357369	0.00286847	0	0	Very Low	Very Low	Very Low	Very Low	Very Low	Very Low	Very Low	Very Low	Very Low	Very Low	Very Low	Very Low	0.427761	0	0	0	0	0	0	0.0399244	0.374291	0	0	Moderate	Very Low	Very Low	Very Low	Very Low	Very Low	Very Low	Very Low	Low	Very Low	Very Low	Moderate	Moderate	0
17570043	GB112075070540	0.00024936	0	0	0	0	0	0	5.43e-05	0.000234102	0	0	Very Low	Very Low	Very Low	Very Low	Very Low	Very Low	Very Low	Very Low	Very Low	Very Low	Very Low	Very Low	0.427761	0	0	0	0	0	0	0.0399244	0.374291	0	0	Moderate	Very Low	Very Low	Very Low	Very Low	Very Low	Very Low	Very Low	Low	Very Low	Very Low	Moderate	Moderate	0
17570044	GB112075070440	1	0	0	0	0	0	0	1	1	1	0	Very High	Very Low	Very Low	Very Low	Very Low	Very Low	Very Low	Very High	Very High	Very High	Very Low	Very High	1.90857	0	0	0	0	0	0	0.178133	1.67	0.136327	0	Very High	Very Low	Very Low	Very Low	Very Low	Very Low	Very Low	Very Low	Very High	Very Low	Very Low	Very High	Very High	0
17570044	GB112075073561	0.466188	0	0	0	0	0	0	0.0753666	0.433156	0.0587171	0	Moderate	Very Low	Very Low	Very Low	Very Low	Very Low	Very Low	Very Low	Moderate	Very Low	Very Low	Moderate	1.90857	0	0	0	0	0	0	0.178133	1.67	0.136327	0	Very High	Very Low	Very Low	Very Low	Very Low	Very Low	Very Low	Very Low	Very High	Very Low	Very Low	Very High	Very High	0
17570045	GB112075070540	0.154401	0	0	0	0	0	0	0	0.144953	0	0	Very Low	Very Low	Very Low	Very Low	Very Low	Very Low	Very Low	Very Low	Very Low	Very Low	Very Low	Very Low	0.774009	0	0	0	0	0	0	0	0.677258	0	0	High	Very Low	Very Low	Very Low	Very Low	Very Low	Very Low	Very Low	High	Very Low	Very Low	High	High	0
17570046	GB112075070400	0.00530531	0	0	0	0	0	0	0.000875052	0.00493768	0	0	Very Low	Very Low	Very Low	Very Low	Very Low	Very Low	Very Low	Very Low	Very Low	Very Low	Very Low	Very Low	0.0295211	0	0	0	0	0	0	0.0027553	0.025831	0	0	Very Low	Very Low	Very Low	Very Low	Very Low	Very Low	Very Low	Very Low	Very Low	Very Low	Very Low	Very Low	Very Low	0
17570049	GB112075070540	0.000568641	0	0	0	0	0	0	0	0.000640615	0	0	Very Low	Very Low	Very Low	Very Low	Very Low	Very Low	Very Low	Very Low	Very Low	Very Low	Very Low	Very Low	0.0478358	0	0	0	0	0	0	0	0.0418563	0	0	Very Low	Very Low	Very Low	Very Low	Very Low	Very Low	Very Low	Very Low	Very Low	Very Low	Very Low	Very Low	Very Low	0
17570053	GB112075070330	0.0320669	0	0	0	0	0	0	0.00331945	0.0281715	0	0	Very Low	Very Low	Very Low	Very Low	Very Low	Very Low	Very Low	Very Low	Very Low	Very Low	Very Low	Very Low	0.046424	0	0	0	0	0	0	0.00433291	0.040621	0	0	Very Low	Very Low	Very Low	Very Low	Very Low	Very Low	Very Low	Very Low	Very Low	Very Low	Very Low	Very Low	Very Low	0
17570056	GB112075070340	0	0	0	0	0	0	0	0	0	0	0	Very Low	Very Low	Very Low	Very Low	Very Low	Very Low	Very Low	Very Low	Very Low	Very Low	Very Low	Very Low	NA	NA	NA	NA	NA	NA	NA	NA	NA	NA	NA	NA	NA	NA	NA	NA	NA	NA	NA	NA	NA	NA	NA	Very Low	0
17570060	GB112075070460	0	0	0	0	0	0	0	0	0	0	0	Very Low	Very Low	Very Low	Very Low	Very Low	Very Low	Very Low	Very Low	Very Low	Very Low	Very Low	Very Low	NA	NA	NA	NA	NA	NA	NA	NA	NA	NA	NA	NA	NA	NA	NA	NA	NA	NA	NA	NA	NA	NA	NA	Very Low	0
17570063	GB112075073640	0.203507	0	0	0	0	0	0	0	0.185168	0.0817635	0	Low	Very Low	Very Low	Very Low	Very Low	Very Low	Very Low	Very Low	Very Low	Very Low	Very Low	Low	1.24908	0	0	0	0	0	0	0	1.09294	0.0892197	0	Very High	Very Low	Very Low	Very Low	Very Low	Very Low	Very Low	Very Low	Very High	Very Low	Very Low	Very High	Very High	0
17570063	GB112075073660	0.00163723	0	0	0	0	0	0	0	0.00151134	0.00120618	0	Very Low	Very Low	Very Low	Very Low	Very Low	Very Low	Very Low	Very Low	Very Low	Very Low	Very Low	Very Low	1.24908	0	0	0	0	0	0	0	1.09294	0.0892197	0	Very High	Very Low	Very Low	Very Low	Very Low	Very Low	Very Low	Very Low	Very High	Very Low	Very Low	Very High	Very High	0
17570065	GB112075073650	0.760567	0	0	0	0	0	0	0	0.735412	0	0	High	Very Low	Very Low	Very Low	Very Low	Very Low	Very Low	Very Low	High	Very Low	Very Low	High	3.17653	0	0	0	0	0	0	0	2.77946	0	0	Very High	Very Low	Very Low	Very Low	Very Low	Very Low	Very Low	Very Low	Very High	Very Low	Very Low	Very High	Very High	0
17570066	GB112075073640	0.0120469	0	0	0	0	0	0	0.0334213	0.0109613	0	0	Very Low	Very Low	Very Low	Very Low	Very Low	Very Low	Very Low	Very Low	Very Low	Very Low	Very Low	Very Low	0.599012	0	0	0	0	0	0	0.0559078	0.524136	0	0	Moderate	Very Low	Very Low	Very Low	Very Low	Very Low	Very Low	Very Low	Moderate	Very Low	Very Low	Moderate	Moderate	0
17570067	GB112075073640	9.88e-05	0	0	0	0	0	0	0.000616419	8.99e-05	0	0	Very Low	Very Low	Very Low	Very Low	Very Low	Very Low	Very Low	Very Low	Very Low	Very Low	Very Low	Very Low	0.0537238	0	0	0	0	0	0	0.00501422	0.0470083	0	0	Very Low	Very Low	Very Low	Very Low	Very Low	Very Low	Very Low	Very Low	Very Low	Very Low	Very Low	Very Low	Very Low	0
17570068	GB112075073570	0.410061	0	0	0	0	0	0	0	0.42188	0	0	Moderate	Very Low	Very Low	Very Low	Very Low	Very Low	Very Low	Very Low	Moderate	Very Low	Very Low	Moderate	0.785233	0	0	0	0	0	0	0	0.687079	0	0	High	Very Low	Very Low	Very Low	Very Low	Very Low	Very Low	Very Low	High	Very Low	Very Low	High	High	0
17570068	GB112075073640	0.0618426	0	0	0	0	0	0	0	0.0562697	0	0	Very Low	Very Low	Very Low	Very Low	Very Low	Very Low	Very Low	Very Low	Very Low	Very Low	Very Low	Very Low	0.785233	0	0	0	0	0	0	0	0.687079	0	0	High	Very Low	Very Low	Very Low	Very Low	Very Low	Very Low	Very Low	High	Very Low	Very Low	High	High	0
17570069	GB112075073640	0.138209	0	0	0	0	0	0	0	0.125755	0	0	Very Low	Very Low	Very Low	Very Low	Very Low	Very Low	Very Low	Very Low	Very Low	Very Low	Very Low	Very Low	5.02759	0	0	0	0	0	0	0	4.39914	0	0	Very High	Very Low	Very Low	Very Low	Very Low	Very Low	Very Low	Very Low	Very High	Very Low	Very Low	Very High	Very High	0
17570071	GB112075073630	0.305641	0	0	0	0	0	0	0.0394619	0.278059	0	0	Low	Very Low	Very Low	Very Low	Very Low	Very Low	Very Low	Very Low	Low	Very Low	Very Low	Low	0.440177	0	0	0	0	0	0	0.0410832	0.385155	0	0	Moderate	Very Low	Very Low	Very Low	Very Low	Very Low	Very Low	Very Low	Low	Very Low	Very Low	Moderate	Moderate	0
17570072	GB112075073640	0.163794	0	0	0	0	0	0	0	0.17884	0	0	Very Low	Very Low	Very Low	Very Low	Very Low	Very Low	Very Low	Very Low	Very Low	Very Low	Very Low	Very Low	5.33404	0	0	0	0	0	0	0	4.66729	0	0	Very High	Very Low	Very Low	Very Low	Very Low	Very Low	Very Low	Very Low	Very High	Very Low	Very Low	Very High	Very High	0
17570073	GB112075073640	0.0130004	0	0	0	0	0	0	0	0.0118289	0	0	Very Low	Very Low	Very Low	Very Low	Very Low	Very Low	Very Low	Very Low	Very Low	Very Low	Very Low	Very Low	0.569889	0	0	0	0	0	0	0	0.498653	0	0	Moderate	Very Low	Very Low	Very Low	Very Low	Very Low	Very Low	Very Low	Moderate	Very Low	Very Low	Moderate	Moderate	0
17570074	GB112075073620	0	0	0	0	0	0	0	0	0	0	0	Very Low	Very Low	Very Low	Very Low	Very Low	Very Low	Very Low	Very Low	Very Low	Very Low	Very Low	Very Low	NA	NA	NA	NA	NA	NA	NA	NA	NA	NA	NA	NA	NA	NA	NA	NA	NA	NA	NA	NA	NA	NA	NA	Very Low	0
17570075	GB112075073600	0.318018	0	0	0	0	0	0	0	0.289785	0	0	Low	Very Low	Very Low	Very Low	Very Low	Very Low	Very Low	Very Low	Low	Very Low	Very Low	Low	0.466314	0	0	0	0	0	0	0	0.408025	0	0	Moderate	Very Low	Very Low	Very Low	Very Low	Very Low	Very Low	Very Low	Moderate	Very Low	Very Low	Moderate	Moderate	0
17570082	GB641211630003	2.7e-05	0	0	0	0	0	0	0.00444379	4.13e-05	0	0	Very Low	Very Low	Very Low	Very Low	Very Low	Very Low	Very Low	Very Low	Very Low	Very Low	Very Low	Very Low	0.261848	0	0	0	0	0	0	0.0244391	0.229117	0	0	Low	Very Low	Very Low	Very Low	Very Low	Very Low	Very Low	Very Low	Low	Very Low	Very Low	Low	Low	2
17570084	GB112075073660	0.123337	0	0	0	0	0	0	0.361891	0.113853	0.674603	0	Very Low	Very Low	Very Low	Very Low	Very Low	Very Low	Very Low	Low	Very Low	High	Very Low	High	3.24519	0	0	0	0	0	0	1.37675	2.83954	5.16281	0	Very High	Very Low	Very Low	Very Low	Very Low	Very Low	Very Low	Very High	Very High	Very High	Very Low	Very High	Very High	0
17570085	GB112075073660	0.0594329	0	0	0	0	0	0	0	0.0877808	0.0148871	0	Very Low	Very Low	Very Low	Very Low	Very Low	Very Low	Very Low	Very Low	Very Low	Very Low	Very Low	Very Low	1.16671	0	0	0	0	0	0	0	1.02087	0.0833365	0	Very High	Very Low	Very Low	Very Low	Very Low	Very Low	Very Low	Very Low	Very High	Very Low	Very Low	Very High	Very High	0
17570086	GB641211630003	0.000507767	0	0	0	0	0	0	0.569947	0.000933164	0	0	Very Low	Very Low	Very Low	Very Low	Very Low	Very Low	Very Low	Moderate	Very Low	Very Low	Very Low	Moderate	3.15652	0	0	0	0	0	0	1.33913	2.76196	0	0	Very High	Very Low	Very Low	Very Low	Very Low	Very Low	Very Low	Very High	Very High	Very Low	Very Low	Very High	Very High	2
17570088	GB530207614700	0	0	0	0	0	0	0	0	0	0	0	Very Low	Very Low	Very Low	Very Low	Very Low	Very Low	Very Low	Very Low	Very Low	Very Low	Very Low	Very Low	NA	NA	NA	NA	NA	NA	NA	NA	NA	NA	NA	NA	NA	NA	NA	NA	NA	NA	NA	NA	NA	NA	NA	Very Low	1
17570194	GB102075073440	0.0561691	0	0	0	0	0	0	0.0155998	0.0542945	0	0	Very Low	Very Low	Very Low	Very Low	Very Low	Very Low	Very Low	Very Low	Very Low	Very Low	Very Low	Very Low	0.169789	0	0	0	0	0	0	0.015847	0.148565	0	0	Very Low	Very Low	Very Low	Very Low	Very Low	Very Low	Very Low	Very Low	Very Low	Very Low	Very Low	Very Low	Very Low	0
17570196	GB530207614700	0.0444647	0	0	0	0	0	0	0	0.0494683	0	0	Very Low	Very Low	Very Low	Very Low	Very Low	Very Low	Very Low	Very Low	Very Low	Very Low	Very Low	Very Low	2.43792	0	0	0	0	0	0	0	2.13318	0	0	Very High	Very Low	Very Low	Very Low	Very Low	Very Low	Very Low	Very Low	Very High	Very Low	Very Low	Very High	Very High	1
17580195	GB530207614700	0.111443	0	0	0	0	0	0	0	0.115718	0	0	Very Low	Very Low	Very Low	Very Low	Very Low	Very Low	Very Low	Very Low	Very Low	Very Low	Very Low	Very Low	1.08292	0	0	0	0	0	0	0	0.947554	0	0	Very High	Very Low	Very Low	Very Low	Very Low	Very Low	Very Low	Very Low	Very High	Very Low	Very Low	Very High	Very High	1
17580272	GB641211630003	2.21e-05	0	0	0	0	0	0	0	3.04e-05	0	0	Very Low	Very Low	Very Low	Very Low	Very Low	Very Low	Very Low	Very Low	Very Low	Very Low	Very Low	Very Low	0.0386152	0	0	0	0	0	0	0	0.0337883	0	0	Very Low	Very Low	Very Low	Very Low	Very Low	Very Low	Very Low	Very Low	Very Low	Very Low	Very Low	Very Low	Very Low	2
17580285	GB112075070520	0.561586	0	0	0	0	0	0	0	0.396225	0	0	Moderate	Very Low	Very Low	Very Low	Very Low	Very Low	Very Low	Very Low	Low	Very Low	Very Low	Moderate	1.10374	0	0	0	0	0	0	0	0.965769	0	0	Very High	Very Low	Very Low	Very Low	Very Low	Very Low	Very Low	Very Low	Very High	Very Low	Very Low	Very High	Very High	0
17580285	GB112075073640	0	0	0	0	0	0	0	0	0	0	0	Very Low	Very Low	Very Low	Very Low	Very Low	Very Low	Very Low	Very Low	Very Low	Very Low	Very Low	Very Low	1.10374	0	0	0	0	0	0	0	0.965769	0	0	Very High	Very Low	Very Low	Very Low	Very Low	Very Low	Very Low	Very Low	Very High	Very Low	Very Low	Very High	Very High	0
17580285	GB531207508700	1	0	0	0	0	0	0	0	1	0	0	Very High	Very Low	Very Low	Very Low	Very Low	Very Low	Very Low	Very Low	Very High	Very Low	Very Low	Very High	1.10374	0	0	0	0	0	0	0	0.965769	0	0	Very High	Very Low	Very Low	Very Low	Very Low	Very Low	Very Low	Very Low	Very High	Very Low	Very Low	Very High	Very High	0
17580285	GB641211630003	0.373737	0	0	0	0	0	0	0	0.343423	0	0	Low	Very Low	Very Low	Very Low	Very Low	Very Low	Very Low	Very Low	Low	Very Low	Very Low	Low	1.10374	0	0	0	0	0	0	0	0.965769	0	0	Very High	Very Low	Very Low	Very Low	Very Low	Very Low	Very Low	Very Low	Very High	Very Low	Very Low	Very High	Very High	2
17670001	GB102076070880	0.169421	0	0	0	0	0	0	0.0174497	0.151891	0.0166103	0	Very Low	Very Low	Very Low	Very Low	Very Low	Very Low	Very Low	Very Low	Very Low	Very Low	Very Low	Very Low	0.240082	0	0	0	0	0	0	0.0224077	0.210072	0.0171487	0	Low	Very Low	Very Low	Very Low	Very Low	Very Low	Very Low	Very Low	Low	Very Low	Very Low	Low	Low	0
17670001	GB112073071050	0.000409043	0	0	0	0	0	0	0.000451603	0.000402732	1	0	Very Low	Very Low	Very Low	Very Low	Very Low	Very Low	Very Low	Very Low	Very Low	Very High	Very Low	Very High	0.240082	0	0	0	0	0	0	0.0224077	0.210072	0.0171487	0	Low	Very Low	Very Low	Very Low	Very Low	Very Low	Very Low	Very Low	Low	Very Low	Very Low	Low	Very High	0
17670002	GB102076070880	0.0227014	0	0	0	0	0	0	0.0046763	0.0203525	0	0	Very Low	Very Low	Very Low	Very Low	Very Low	Very Low	Very Low	Very Low	Very Low	Very Low	Very Low	Very Low	0.348789	0	0	0	0	0	0	0.0325536	0.30519	0	0	Low	Very Low	Very Low	Very Low	Very Low	Very Low	Very Low	Very Low	Low	Very Low	Very Low	Low	Low	0
17670004	GB102076070650	0.511803	0	0	0	0	0	0	0	0.478435	0	0	Moderate	Very Low	Very Low	Very Low	Very Low	Very Low	Very Low	Very Low	Moderate	Very Low	Very Low	Moderate	1.04835	0	0	0	0	0	0	0	0.917308	0	0	Very High	Very Low	Very Low	Very Low	Very Low	Very Low	Very Low	Very Low	Very High	Very Low	Very Low	Very High	Very High	0
17670005	GB102076070790	0.284967	0	0	0	0	0	0	0	0.258556	0	0	Low	Very Low	Very Low	Very Low	Very Low	Very Low	Very Low	Very Low	Low	Very Low	Very Low	Low	0.398537	0	0	0	0	0	0	0	0.34872	0	0	Low	Very Low	Very Low	Very Low	Very Low	Very Low	Very Low	Very Low	Low	Very Low	Very Low	Low	Low	0
17670010	GB102076070960	0.0303944	0	0	0	0	0	0	0	0.0266965	0	0	Very Low	Very Low	Very Low	Very Low	Very Low	Very Low	Very Low	Very Low	Very Low	Very Low	Very Low	Very Low	0.0313472	0	0	0	0	0	0	0	0.0274288	0	0	Very Low	Very Low	Very Low	Very Low	Very Low	Very Low	Very Low	Very Low	Very Low	Very Low	Very Low	Very Low	Very Low	0
17670011	GB102076070620	0.264144	0	0	0	0	0	0	0.032417	0.239018	0	0	Low	Very Low	Very Low	Very Low	Very Low	Very Low	Very Low	Very Low	Low	Very Low	Very Low	Low	0.358962	0	0	0	0	0	0	0.0335031	0.314092	0	0	Low	Very Low	Very Low	Very Low	Very Low	Very Low	Very Low	Very Low	Low	Very Low	Very Low	Low	Low	0
17670013	GB102076070590	0.831071	0	0	0	0	0	0	0	0.811488	0.260028	0	Very High	Very Low	Very Low	Very Low	Very Low	Very Low	Very Low	Very Low	Very High	Low	Very Low	Very High	4.91965	0	0	0	0	0	0	0	4.30469	0.351403	0	Very High	Very Low	Very Low	Very Low	Very Low	Very Low	Very Low	Very Low	Very High	Low	Very Low	Very High	Very High	0
17670014	GB102076070930	0	0	0	0	0	0	0	0	0	0	0	Very Low	Very Low	Very Low	Very Low	Very Low	Very Low	Very Low	Very Low	Very Low	Very Low	Very Low	Very Low	NA	NA	NA	NA	NA	NA	NA	NA	NA	NA	NA	NA	NA	NA	NA	NA	NA	NA	NA	NA	NA	NA	NA	Very Low	0
17670015	GB102076070930	0	0	0	0	0	0	0	0	0	0	0	Very Low	Very Low	Very Low	Very Low	Very Low	Very Low	Very Low	Very Low	Very Low	Very Low	Very Low	Very Low	NA	NA	NA	NA	NA	NA	NA	NA	NA	NA	NA	NA	NA	NA	NA	NA	NA	NA	NA	NA	NA	NA	NA	Very Low	0
17670019	GB102076070830	0.432733	0	0	0	0	0	0	0	0.400294	0	0	Moderate	Very Low	Very Low	Very Low	Very Low	Very Low	Very Low	Very Low	Moderate	Very Low	Very Low	Moderate	0.762838	0	0	0	0	0	0	0	0.667483	0	0	High	Very Low	Very Low	Very Low	Very Low	Very Low	Very Low	Very Low	High	Very Low	Very Low	High	High	0
17670024	GB102076070600	0.579603	0	0	0	0	0	0	0	0.546766	0	0	Moderate	Very Low	Very Low	Very Low	Very Low	Very Low	Very Low	Very Low	Moderate	Very Low	Very Low	Moderate	1.57065	0	0	0	0	0	0	0	1.37432	0	0	Very High	Very Low	Very Low	Very Low	Very Low	Very Low	Very Low	Very Low	Very High	Very Low	Very Low	Very High	Very High	0
17670024	GB112072071760	0.0590112	0	0	0	0	0	0	0	0.0590112	0	0	Very Low	Very Low	Very Low	Very Low	Very Low	Very Low	Very Low	Very Low	Very Low	Very Low	Very Low	Very Low	1.57065	0	0	0	0	0	0	0	1.37432	0	0	Very High	Very Low	Very Low	Very Low	Very Low	Very Low	Very Low	Very Low	Very High	Very Low	Very Low	Very High	Very High	0
17670025	GB102076070690	1	0	0	0	0	0	0	1	1	1	0	Very High	Very Low	Very Low	Very Low	Very Low	Very Low	Very Low	Very High	Very High	Very High	Very Low	Very High	1.2325	0	0	0	0	0	0	0.115034	1.07844	0.0880361	0	Very High	Very Low	Very Low	Very Low	Very Low	Very Low	Very Low	Very Low	Very High	Very Low	Very Low	Very High	Very High	0
17670025	GB102076070900	0.366672	0	0	0	0	0	0	0.0512661	0.33625	0.0397121	0	Low	Very Low	Very Low	Very Low	Very Low	Very Low	Very Low	Very Low	Low	Very Low	Very Low	Low	1.2325	0	0	0	0	0	0	0.115034	1.07844	0.0880361	0	Very High	Very Low	Very Low	Very Low	Very Low	Very Low	Very Low	Very Low	Very High	Very Low	Very Low	Very High	Very High	0
17670042	GB102076070950	0.496898	0	0	0	0	0	0	0	0.46358	0	0	Moderate	Very Low	Very Low	Very Low	Very Low	Very Low	Very Low	Very Low	Moderate	Very Low	Very Low	Moderate	0.987669	0	0	0	0	0	0	0	0.86421	0	0	Very High	Very Low	Very Low	Very Low	Very Low	Very Low	Very Low	Very Low	Very High	Very Low	Very Low	Very High	Very High	0
17670046	GB102076073940	2.06e-05	0	0	0	0	0	0	2.34e-06	1.89e-05	0	0	Very Low	Very Low	Very Low	Very Low	Very Low	Very Low	Very Low	Very Low	Very Low	Very Low	Very Low	Very Low	0.0175035	0	0	0	0	0	0	0.00163366	0.0153155	0	0	Very Low	Very Low	Very Low	Very Low	Very Low	Very Low	Very Low	Very Low	Very Low	Very Low	Very Low	Very Low	Very Low	0
17670047	GB102076073800	0.00202436	0	0	0	0	0	0	0.00561066	0.00222764	0	0	Very Low	Very Low	Very Low	Very Low	Very Low	Very Low	Very Low	Very Low	Very Low	Very Low	Very Low	Very Low	0.00755552	0	0	0	0	0	0	0.00755552	0.00755552	0	0	Very Low	Very Low	Very Low	Very Low	Very Low	Very Low	Very Low	Very Low	Very Low	Very Low	Very Low	Very Low	Very Low	0
17670049	GB102076073880	0.747888	0	0	0	0	0	0	0.418651	0.730757	0.207144	0	High	Very Low	Very Low	Very Low	Very Low	Very Low	Very Low	Moderate	High	Low	Very Low	High	0.95171	0	0	0	0	0	0	0.0888263	0.832746	0.0679793	0	Very High	Very Low	Very Low	Very Low	Very Low	Very Low	Very Low	Very Low	Very High	Very Low	Very Low	Very High	Very High	0
17670049	GB102076073940	0.379458	0	0	0	0	0	0	0.0575796	0.348227	0.0435739	0	Low	Very Low	Very Low	Very Low	Very Low	Very Low	Very Low	Very Low	Low	Very Low	Very Low	Low	0.95171	0	0	0	0	0	0	0.0888263	0.832746	0.0679793	0	Very High	Very Low	Very Low	Very Low	Very Low	Very Low	Very Low	Very Low	Very High	Very Low	Very Low	Very High	Very High	0
17670049	GB102076074030	0.798451	0	0	0	0	0	0	1	0.800388	0.436012	0	High	Very Low	Very Low	Very Low	Very Low	Very Low	Very Low	Very High	Very High	Moderate	Very Low	Very High	0.95171	0	0	0	0	0	0	0.0888263	0.832746	0.0679793	0	Very High	Very Low	Very Low	Very Low	Very Low	Very Low	Very Low	Very Low	Very High	Very Low	Very Low	Very High	Very High	0
17670049	GB112071065270	0.00734059	0	0	0	0	0	0	0.0107316	0.00430289	1	0	Very Low	Very Low	Very Low	Very Low	Very Low	Very Low	Very Low	Very Low	Very Low	Very High	Very Low	Very High	0.95171	0	0	0	0	0	0	0.0888263	0.832746	0.0679793	0	Very High	Very Low	Very Low	Very Low	Very Low	Very Low	Very Low	Very Low	Very High	Very Low	Very Low	Very High	Very High	0
17670051	GB102076073910	0.273582	0	0	0	0	0	0	0	0.24786	0	0	Low	Very Low	Very Low	Very Low	Very Low	Very Low	Very Low	Very Low	Low	Very Low	Very Low	Low	0.376618	0	0	0	0	0	0	0	0.329541	0	0	Low	Very Low	Very Low	Very Low	Very Low	Very Low	Very Low	Very Low	Low	Very Low	Very Low	Low	Low	0
17670054	GB102076073940	0.000132604	0	0	0	0	0	0	0	9.74e-05	0	0	Very Low	Very Low	Very Low	Very Low	Very Low	Very Low	Very Low	Very Low	Very Low	Very Low	Very Low	Very Low	0.0709133	0	0	0	0	0	0	0	0.0620491	0	0	Very Low	Very Low	Very Low	Very Low	Very Low	Very Low	Very Low	Very Low	Very Low	Very Low	Very Low	Very Low	Very Low	0
17670058	GB102076073940	6.84e-05	0	0	0	0	0	0	0	7.18e-05	0	0	Very Low	Very Low	Very Low	Very Low	Very Low	Very Low	Very Low	Very Low	Very Low	Very Low	Very Low	Very Low	0.0853102	0	0	0	0	0	0	0	0.0853102	0	0	Very Low	Very Low	Very Low	Very Low	Very Low	Very Low	Very Low	Very Low	Very Low	Very Low	Very Low	Very Low	Very Low	0
17670061	GB102076073940	0.00061317	0	0	0	0	0	0	0	0.000562702	0	0	Very Low	Very Low	Very Low	Very Low	Very Low	Very Low	Very Low	Very Low	Very Low	Very Low	Very Low	Very Low	0.189977	0	0	0	0	0	0	0	0.16623	0	0	Very Low	Very Low	Very Low	Very Low	Very Low	Very Low	Very Low	Very Low	Very Low	Very Low	Very Low	Very Low	Very Low	0
17670062	GB102076073870	0.0640599	0	0	0	0	0	0	0.0063476	0.0565049	0	0	Very Low	Very Low	Very Low	Very Low	Very Low	Very Low	Very Low	Very Low	Very Low	Very Low	Very Low	Very Low	0.0684444	0	0	0	0	0	0	0.00638815	0.0598889	0	0	Very Low	Very Low	Very Low	Very Low	Very Low	Very Low	Very Low	Very Low	Very Low	Very Low	Very Low	Very Low	Very Low	0
17670062	GB102076073900	0	0	0	0	0	0	0	0	0	0	0	Very Low	Very Low	Very Low	Very Low	Very Low	Very Low	Very Low	Very Low	Very Low	Very Low	Very Low	Very Low	0.0684444	0	0	0	0	0	0	0.00638815	0.0598889	0	0	Very Low	Very Low	Very Low	Very Low	Very Low	Very Low	Very Low	Very Low	Very Low	Very Low	Very Low	Very Low	Very Low	0
17670065	GB102076073840	1	0	0	0	0	0	0	0	0.0367634	0	0	Very High	Very Low	Very Low	Very Low	Very Low	Very Low	Very Low	Very Low	Very Low	Very Low	Very Low	Very High	0.0985111	0	0	0	0	0	0	0	0.0861972	0	0	Very Low	Very Low	Very Low	Very Low	Very Low	Very Low	Very Low	Very Low	Very Low	Very Low	Very Low	Very Low	Very High	0
17670065	GB102076073940	0.000563454	0	0	0	0	0	0	0	0.000517079	0	0	Very Low	Very Low	Very Low	Very Low	Very Low	Very Low	Very Low	Very Low	Very Low	Very Low	Very Low	Very Low	0.0985111	0	0	0	0	0	0	0	0.0861972	0	0	Very Low	Very Low	Very Low	Very Low	Very Low	Very Low	Very Low	Very Low	Very Low	Very Low	Very Low	Very Low	Very Low	0
17670066	GB102076073800	0.730045	0	0	0	0	0	0	0.251798	0.702936	1	0	High	Very Low	Very Low	Very Low	Very Low	Very Low	Very Low	Low	High	Very High	Very Low	Very High	1.17563	0	0	0	0	0	0	0.109726	1.02868	0.0839737	0	Very High	Very Low	Very Low	Very Low	Very Low	Very Low	Very Low	Very Low	Very High	Very Low	Very Low	Very High	Very High	0
17670066	GB102076073940	0.00618528	0	0	0	0	0	0	0.000938564	0.0056762	0.00227285	0	Very Low	Very Low	Very Low	Very Low	Very Low	Very Low	Very Low	Very Low	Very Low	Very Low	Very Low	Very Low	1.17563	0	0	0	0	0	0	0.109726	1.02868	0.0839737	0	Very High	Very Low	Very Low	Very Low	Very Low	Very Low	Very Low	Very Low	Very High	Very Low	Very Low	Very High	Very High	0
17670068	GB102076073810	0.0076356	0	0	0	0	0	0	0.000717624	0.00668753	0	0	Very Low	Very Low	Very Low	Very Low	Very Low	Very Low	Very Low	Very Low	Very Low	Very Low	Very Low	Very Low	0.132255	0	0	0	0	0	0	0.0123438	0.115723	0	0	Very Low	Very Low	Very Low	Very Low	Very Low	Very Low	Very Low	Very Low	Very Low	Very Low	Very Low	Very Low	Very Low	0
17670068	GB102076073820	1	0	0	0	0	0	0	1	1	0	0	Very High	Very Low	Very Low	Very Low	Very Low	Very Low	Very Low	Very High	Very High	Very Low	Very Low	Very High	0.132255	0	0	0	0	0	0	0.0123438	0.115723	0	0	Very Low	Very Low	Very Low	Very Low	Very Low	Very Low	Very Low	Very Low	Very Low	Very Low	Very Low	Very Low	Very High	0
17670069	GB102076073840	0	0	0	0	0	0	0	0	0.00458435	0	0	Very Low	Very Low	Very Low	Very Low	Very Low	Very Low	Very Low	Very Low	Very Low	Very Low	Very Low	Very Low	0	0	0	0	0	0	0	0	0.00478208	0	0	Very Low	Very Low	Very Low	Very Low	Very Low	Very Low	Very Low	Very Low	Very Low	Very Low	Very Low	Very Low	Very Low	0
17670074	GB102076073900	0	0	0	0	0	0	0	0	0	0	0	Very Low	Very Low	Very Low	Very Low	Very Low	Very Low	Very Low	Very Low	Very Low	Very Low	Very Low	Very Low	NA	NA	NA	NA	NA	NA	NA	NA	NA	NA	NA	NA	NA	NA	NA	NA	NA	NA	NA	NA	NA	NA	NA	Very Low	0
17670074	GB102076073940	0	0	0	0	0	0	0	0	0	0	0	Very Low	Very Low	Very Low	Very Low	Very Low	Very Low	Very Low	Very Low	Very Low	Very Low	Very Low	Very Low	NA	NA	NA	NA	NA	NA	NA	NA	NA	NA	NA	NA	NA	NA	NA	NA	NA	NA	NA	NA	NA	NA	NA	Very Low	0
17670074	GB102076073981	0	0	0	0	0	0	0	0	0	0	0	Very Low	Very Low	Very Low	Very Low	Very Low	Very Low	Very Low	Very Low	Very Low	Very Low	Very Low	Very Low	NA	NA	NA	NA	NA	NA	NA	NA	NA	NA	NA	NA	NA	NA	NA	NA	NA	NA	NA	NA	NA	NA	NA	Very Low	0
17670074	GB112069061000	0	0	0	0	0	0	0	0	0	0	0	Very Low	Very Low	Very Low	Very Low	Very Low	Very Low	Very Low	Very Low	Very Low	Very Low	Very Low	Very Low	NA	NA	NA	NA	NA	NA	NA	NA	NA	NA	NA	NA	NA	NA	NA	NA	NA	NA	NA	NA	NA	NA	NA	Very Low	0
17670075	GB102076073940	0.0002199	0	0	0	0	0	0	0	0.000201801	0	0	Very Low	Very Low	Very Low	Very Low	Very Low	Very Low	Very Low	Very Low	Very Low	Very Low	Very Low	Very Low	0.0243131	0	0	0	0	0	0	0	0.021274	0	0	Very Low	Very Low	Very Low	Very Low	Very Low	Very Low	Very Low	Very Low	Very Low	Very Low	Very Low	Very Low	Very Low	0
17670078	GB102076071010	0.109608	0	0	0	0	0	0	0	0.0883906	0	0	Very Low	Very Low	Very Low	Very Low	Very Low	Very Low	Very Low	Very Low	Very Low	Very Low	Very Low	Very Low	0.36785	0	0	0	0	0	0	0	0.321869	0	0	Low	Very Low	Very Low	Very Low	Very Low	Very Low	Very Low	Very Low	Low	Very Low	Very Low	Low	Low	0
17670084	GB102076070990	0.350132	0	0	0	0	0	0	0.186046	0.320388	0.461538	0	Low	Very Low	Very Low	Very Low	Very Low	Very Low	Very Low	Very Low	Low	Moderate	Very Low	Moderate	2.88872	0	0	0	0	0	0	1.22552	2.52763	4.59569	0	Very High	Very Low	Very Low	Very Low	Very Low	Very Low	Very Low	Very High	Very High	Very High	Very Low	Very High	Very High	0
17670084	GB102076071010	0.592423	0	0	0	0	0	0	1	0.636992	1	0	Moderate	Very Low	Very Low	Very Low	Very Low	Very Low	Very Low	Very High	High	Very High	Very Low	Very High	2.88872	0	0	0	0	0	0	1.22552	2.52763	4.59569	0	Very High	Very Low	Very Low	Very Low	Very Low	Very Low	Very Low	Very High	Very High	Very High	Very Low	Very High	Very High	0
17670084	GB102076071020	0.977877	0	0	0	0	0	0	1	0.976711	1	0	Very High	Very Low	Very Low	Very Low	Very Low	Very Low	Very Low	Very High	Very High	Very High	Very Low	Very High	2.88872	0	0	0	0	0	0	1.22552	2.52763	4.59569	0	Very High	Very Low	Very Low	Very Low	Very Low	Very Low	Very Low	Very High	Very High	Very High	Very Low	Very High	Very High	0
17670085	GB102076071020	0.00225654	0	0	0	0	0	0	0	0.00211298	0	0	Very Low	Very Low	Very Low	Very Low	Very Low	Very Low	Very Low	Very Low	Very Low	Very Low	Very Low	Very Low	0.162334	0	0	0	0	0	0	0	0.142043	0	0	Very Low	Very Low	Very Low	Very Low	Very Low	Very Low	Very Low	Very Low	Very Low	Very Low	Very Low	Very Low	Very Low	0
17670087	GB102076071020	0.000626894	0	0	0	0	0	0	0	0.000587012	0	0	Very Low	Very Low	Very Low	Very Low	Very Low	Very Low	Very Low	Very Low	Very Low	Very Low	Very Low	Very Low	0.117428	0	0	0	0	0	0	0	0.10275	0	0	Very Low	Very Low	Very Low	Very Low	Very Low	Very Low	Very Low	Very Low	Very Low	Very Low	Very Low	Very Low	Very Low	0
17670090	GB102076074040	0.0507886	0	0	0	0	0	0	0.00485231	0.0408845	0	0	Very Low	Very Low	Very Low	Very Low	Very Low	Very Low	Very Low	Very Low	Very Low	Very Low	Very Low	Very Low	0.0778307	0	0	0	0	0	0	0.0072642	0.0681018	0	0	Very Low	Very Low	Very Low	Very Low	Very Low	Very Low	Very Low	Very Low	Very Low	Very Low	Very Low	Very Low	Very Low	0
17670091	GB102076073981	0.0701791	0	0	0	0	0	0	0	0.0620678	0	0	Very Low	Very Low	Very Low	Very Low	Very Low	Very Low	Very Low	Very Low	Very Low	Very Low	Very Low	Very Low	0.542458	0	0	0	0	0	0	0	0.474651	0	0	Moderate	Very Low	Very Low	Very Low	Very Low	Very Low	Very Low	Very Low	Moderate	Very Low	Very Low	Moderate	Moderate	0
17670095	GB102076074040	0.0334319	0	0	0	0	0	0	0.00383288	0.0358833	0	0	Very Low	Very Low	Very Low	Very Low	Very Low	Very Low	Very Low	Very Low	Very Low	Very Low	Very Low	Very Low	0.127008	0	0	0	0	0	0	0.0118541	0.111132	0	0	Very Low	Very Low	Very Low	Very Low	Very Low	Very Low	Very Low	Very Low	Very Low	Very Low	Very Low	Very Low	Very Low	0
17670101	GB102076073992	0.611121	0	0	0	0	0	0	0	0.559482	0.0958777	0	High	Very Low	Very Low	Very Low	Very Low	Very Low	Very Low	Very Low	Moderate	Very Low	Very Low	High	2.39408	0	0	0	0	0	0	0	2.09482	0.171006	0	Very High	Very Low	Very Low	Very Low	Very Low	Very Low	Very Low	Very Low	Very High	Very Low	Very Low	Very High	Very High	0
17670104	GB102076074030	0.0106886	0	0	0	0	0	0	0	0.0107145	0	0	Very Low	Very Low	Very Low	Very Low	Very Low	Very Low	Very Low	Very Low	Very Low	Very Low	Very Low	Very Low	0.132345	0	0	0	0	0	0	0	0.115802	0	0	Very Low	Very Low	Very Low	Very Low	Very Low	Very Low	Very Low	Very Low	Very Low	Very Low	Very Low	Very Low	Very Low	0
17670105	GB102076073992	0.00802303	0	0	0	0	0	0	0.00592691	0.00918138	0.00209787	0	Very Low	Very Low	Very Low	Very Low	Very Low	Very Low	Very Low	Very Low	Very Low	Very Low	Very Low	Very Low	0.0860396	0	0	0	0	0	0	0.00803036	0.0752847	0.00614569	0	Very Low	Very Low	Very Low	Very Low	Very Low	Very Low	Very Low	Very Low	Very Low	Very Low	Very Low	Very Low	Very Low	0
17670110	GB102076073991	0.0859459	0	0	0	0	0	0	0	0.0760194	0	0	Very Low	Very Low	Very Low	Very Low	Very Low	Very Low	Very Low	Very Low	Very Low	Very Low	Very Low	Very Low	0.135196	0	0	0	0	0	0	0	0.118297	0	0	Very Low	Very Low	Very Low	Very Low	Very Low	Very Low	Very Low	Very Low	Very Low	Very Low	Very Low	Very Low	Very Low	0
17670112	GB102076074030	0.00376274	0	0	0	0	0	0	0	0.0028289	0.00154104	0	Very Low	Very Low	Very Low	Very Low	Very Low	Very Low	Very Low	Very Low	Very Low	Very Low	Very Low	Very Low	0.0383585	0	0	0	0	0	0	0	0.0335637	0.00273989	0	Very Low	Very Low	Very Low	Very Low	Very Low	Very Low	Very Low	Very Low	Very Low	Very Low	Very Low	Very Low	Very Low	0
17670113	GB102076073730	1	0	0	0	0	0	0	0	1	0	0	Very High	Very Low	Very Low	Very Low	Very Low	Very Low	Very Low	Very Low	Very High	Very Low	Very Low	Very High	0.976494	0	0	0	0	0	0	0	0.854433	0	0	Very High	Very Low	Very Low	Very Low	Very Low	Very Low	Very Low	Very Low	Very High	Very Low	Very Low	Very High	Very High	0
17670113	GB102076073740	0.48848	0	0	0	0	0	0	0	0.455216	0	0	Moderate	Very Low	Very Low	Very Low	Very Low	Very Low	Very Low	Very Low	Moderate	Very Low	Very Low	Moderate	0.976494	0	0	0	0	0	0	0	0.854433	0	0	Very High	Very Low	Very Low	Very Low	Very Low	Very Low	Very Low	Very Low	Very High	Very Low	Very Low	Very High	Very High	0
17670115	GB102076073880	0.0880057	0	0	0	0	0	0	0.0277108	0.0859897	0.0292501	0	Very Low	Very Low	Very Low	Very Low	Very Low	Very Low	Very Low	Very Low	Very Low	Very Low	Very Low	Very Low	0.536273	0	0	0	0	0	0	0.0500522	0.469239	0.0383052	0	Moderate	Very Low	Very Low	Very Low	Very Low	Very Low	Very Low	Very Low	Moderate	Very Low	Very Low	Moderate	Moderate	0
17670116	GB102076073760	0.342421	0	0	0	0	0	0	0	0.313016	0	0	Low	Very Low	Very Low	Very Low	Very Low	Very Low	Very Low	Very Low	Low	Very Low	Very Low	Low	0.520729	0	0	0	0	0	0	0	0.455638	0	0	Moderate	Very Low	Very Low	Very Low	Very Low	Very Low	Very Low	Very Low	Moderate	Very Low	Very Low	Moderate	Moderate	0
17670126	GB530207614700	0.14217	0	0	0	0	0	0	0	0.158168	0	0	Very Low	Very Low	Very Low	Very Low	Very Low	Very Low	Very Low	Very Low	Very Low	Very Low	Very Low	Very Low	2.37995	0	0	0	0	0	0	0	2.08246	0	0	Very High	Very Low	Very Low	Very Low	Very Low	Very Low	Very Low	Very Low	Very High	Very Low	Very Low	Very High	Very High	1
17670128	GB102076073950	0.296568	0	0	0	0	0	0	0.223772	0.287631	0	0	Low	Very Low	Very Low	Very Low	Very Low	Very Low	Very Low	Low	Low	Very Low	Very Low	Low	3.08872	0	0	0	0	0	0	0.288281	2.70263	0	0	Very High	Very Low	Very Low	Very Low	Very Low	Very Low	Very Low	Low	Very High	Very Low	Very Low	Very High	Very High	0
17670129	GB530207614700	0.0346172	0	0	0	0	0	0	0	0.0308101	0	0	Very Low	Very Low	Very Low	Very Low	Very Low	Very Low	Very Low	Very Low	Very Low	Very Low	Very Low	Very Low	0.958186	0	0	0	0	0	0	0	0.838413	0	0	Very High	Very Low	Very Low	Very Low	Very Low	Very Low	Very Low	Very Low	Very High	Very Low	Very Low	Very High	Very High	1
17670162	GB102076070750	0.453245	0	0	0	0	0	0	0	0.420408	0	0	Moderate	Very Low	Very Low	Very Low	Very Low	Very Low	Very Low	Very Low	Moderate	Very Low	Very Low	Moderate	0.828973	0	0	0	0	0	0	0	0.725352	0	0	Very High	Very Low	Very Low	Very Low	Very Low	Very Low	Very Low	Very Low	High	Very Low	Very Low	Very High	Very High	0
17670167	GB102076070980	0	0	0	0	0	0	0	0	0	0	0	Very Low	Very Low	Very Low	Very Low	Very Low	Very Low	Very Low	Very Low	Very Low	Very Low	Very Low	Very Low	0	0	0	0	0	0	0	0	0	0	0	Very Low	Very Low	Very Low	Very Low	Very Low	Very Low	Very Low	Very Low	Very Low	Very Low	Very Low	Very Low	Very Low	0
17670194	GB102076073940	0.00736704	0	0	0	0	0	0	0	0.00901426	0	0	Very Low	Very Low	Very Low	Very Low	Very Low	Very Low	Very Low	Very Low	Very Low	Very Low	Very Low	Very Low	2.14122	0	0	0	0	0	0	0	1.87357	0	0	Very High	Very Low	Very Low	Very Low	Very Low	Very Low	Very Low	Very Low	Very High	Very Low	Very Low	Very High	Very High	0
17670206	GB102076073981	0.0150256	0	0	0	0	0	0	0.00178233	0.0132889	0.0013646	0	Very Low	Very Low	Very Low	Very Low	Very Low	Very Low	Very Low	Very Low	Very Low	Very Low	Very Low	Very Low	0.159918	0	0	0	0	0	0	0.0149257	0.139928	0.0114227	0	Very Low	Very Low	Very Low	Very Low	Very Low	Very Low	Very Low	Very Low	Very Low	Very Low	Very Low	Very Low	Very Low	0
17670206	GB102076074050	1	0	0	0	0	0	0	1	1	1	0	Very High	Very Low	Very Low	Very Low	Very Low	Very Low	Very Low	Very High	Very High	Very High	Very Low	Very High	0.159918	0	0	0	0	0	0	0.0149257	0.139928	0.0114227	0	Very Low	Very Low	Very Low	Very Low	Very Low	Very Low	Very Low	Very Low	Very Low	Very Low	Very Low	Very Low	Very High	0
17670208	GB530207614700	0.0358161	0	0	0	0	0	0	0	0.0398465	0	0	Very Low	Very Low	Very Low	Very Low	Very Low	Very Low	Very Low	Very Low	Very Low	Very Low	Very Low	Very Low	0.547631	0	0	0	0	0	0	0	0.479177	0	0	Moderate	Very Low	Very Low	Very Low	Very Low	Very Low	Very Low	Very Low	Moderate	Very Low	Very Low	Moderate	Moderate	1
17680290	GB102076073940	0.000816344	0	0	0	0	0	0	0.000139357	0.000749154	0	0	Very Low	Very Low	Very Low	Very Low	Very Low	Very Low	Very Low	Very Low	Very Low	Very Low	Very Low	Very Low	1.56056	0	0	0	0	0	0	0.145652	1.36549	0	0	Very High	Very Low	Very Low	Very Low	Very Low	Very Low	Very Low	Very Low	Very High	Very Low	Very Low	Very High	Very High	0
17680299	GB102076073820	0	0	0	0	0	0	0	0	0	0	0	Very Low	Very Low	Very Low	Very Low	Very Low	Very Low	Very Low	Very Low	Very Low	Very Low	Very Low	Very Low	NA	NA	NA	NA	NA	NA	NA	NA	NA	NA	NA	NA	NA	NA	NA	NA	NA	NA	NA	NA	NA	NA	NA	Very Low	0
17680300	GB102076070880	0.000136516	0	0	0	0	0	0	0.000225973	0.000139875	0	0	Very Low	Very Low	Very Low	Very Low	Very Low	Very Low	Very Low	Very Low	Very Low	Very Low	Very Low	Very Low	0.00520965	0	0	0	0	0	0	0.00520965	0.00520965	0	0	Very Low	Very Low	Very Low	Very Low	Very Low	Very Low	Very Low	Very Low	Very Low	Very Low	Very Low	Very Low	Very Low	0
17680364	GB102076070630	0.310618	0	0	0	0	0	0	0	0.28277	0	0	Low	Very Low	Very Low	Very Low	Very Low	Very Low	Very Low	Very Low	Low	Very Low	Very Low	Low	0.450576	0	0	0	0	0	0	0	0.394254	0	0	Moderate	Very Low	Very Low	Very Low	Very Low	Very Low	Very Low	Very Low	Low	Very Low	Very Low	Moderate	Moderate	0
17680367	GB102076070740	0.0401652	0	0	0	0	0	0	0.00389043	0.0353219	0	0	Very Low	Very Low	Very Low	Very Low	Very Low	Very Low	Very Low	Very Low	Very Low	Very Low	Very Low	Very Low	0.041846	0	0	0	0	0	0	0.00390562	0.0366152	0	0	Very Low	Very Low	Very Low	Very Low	Very Low	Very Low	Very Low	Very Low	Very Low	Very Low	Very Low	Very Low	Very Low	0
17680455	GB530207614700	0.0777109	0	0	0	0	0	0	0	0.0864556	0	0	Very Low	Very Low	Very Low	Very Low	Very Low	Very Low	Very Low	Very Low	Very Low	Very Low	Very Low	Very Low	0.729975	0	0	0	0	0	0	0	0.638728	0	0	High	Very Low	Very Low	Very Low	Very Low	Very Low	Very Low	Very Low	High	Very Low	Very Low	High	High	1
17680463	GB102076074030	0.00126443	0	0	0	0	0	0	0	0.0012675	0	0	Very Low	Very Low	Very Low	Very Low	Very Low	Very Low	Very Low	Very Low	Very Low	Very Low	Very Low	Very Low	0.181258	0	0	0	0	0	0	0	0.158601	0	0	Very Low	Very Low	Very Low	Very Low	Very Low	Very Low	Very Low	Very Low	Very Low	Very Low	Very Low	Very Low	Very Low	0
17680532	GB102076070850	0.0158074	0	0	0	0	0	0	0.00149681	0.0138589	0	0	Very Low	Very Low	Very Low	Very Low	Very Low	Very Low	Very Low	Very Low	Very Low	Very Low	Very Low	Very Low	0.0160613	0	0	0	0	0	0	0.00149905	0.0140536	0	0	Very Low	Very Low	Very Low	Very Low	Very Low	Very Low	Very Low	Very Low	Very Low	Very Low	Very Low	Very Low	Very Low	0
17770001	GB102077074150	0	0	0	0	0	0	0	0	0	0	0	Very Low	Very Low	Very Low	Very Low	Very Low	Very Low	Very Low	Very Low	Very Low	Very Low	Very Low	Very Low	NA	NA	NA	NA	NA	NA	NA	NA	NA	NA	NA	NA	NA	NA	NA	NA	NA	NA	NA	NA	NA	NA	NA	Very Low	0
17770003	GB102077074190	0.191496	0	0	0	0	0	0	0.021628	0.171668	0	0	Very Low	Very Low	Very Low	Very Low	Very Low	Very Low	Very Low	Very Low	Very Low	Very Low	Very Low	Very Low	0.236852	0	0	0	0	0	0	0.0221062	0.207245	0	0	Low	Very Low	Very Low	Very Low	Very Low	Very Low	Very Low	Very Low	Low	Very Low	Very Low	Low	Low	0
31294	GB108048002280	0.682591	0	0	0.283742	0	0	0	0.167162	0.652982	0	0	High	Very Low	Very Low	Low	Very Low	Very Low	Very Low	Very Low	High	Very Low	Very Low	High	2.15051	0	0	0.396146	0	0	0	0.200714	1.88169	0	0	Very High	Very Low	Very Low	Low	Very Low	Very Low	Very Low	Low	Very High	Very Low	Very Low	Very High	Very High	0
31294	GB620806110001	0	0	0	0	0	0	0	0	0	0	0	Very Low	Very Low	Very Low	Very Low	Very Low	Very Low	Very Low	Very Low	Very Low	Very Low	Very Low	Very Low	2.15051	0	0	0.396146	0	0	0	0.200714	1.88169	0	0	Very High	Very Low	Very Low	Low	Very Low	Very Low	Very Low	Low	Very High	Very Low	Very Low	Very High	Very High	13
031299/FN/01	GB108048001330	1	0	0	0	0	0	0	0	1	0	0	Very High	Very Low	Very Low	Very Low	Very Low	Very Low	Very Low	Very Low	Very High	Very Low	Very Low	Very High	0.072541	0	0	0	0	0	0	0	0.0634734	0	0	Very Low	Very Low	Very Low	Very Low	Very Low	Very Low	Very Low	Very Low	Very Low	Very Low	Very Low	Very Low	Very High	0
031299/FN/01	GB108048002290	1	0	0	0	0	0	0	0	1	0	0	Very High	Very Low	Very Low	Very Low	Very Low	Very Low	Very Low	Very Low	Very High	Very Low	Very Low	Very High	0.072541	0	0	0	0	0	0	0	0.0634734	0	0	Very Low	Very Low	Very Low	Very Low	Very Low	Very Low	Very Low	Very Low	Very Low	Very Low	Very Low	Very Low	Very High	0
031299/FN/01	GB620806110001	0.0322722	0	0	0	0	0	0	0	0.0284497	0	0	Very Low	Very Low	Very Low	Very Low	Very Low	Very Low	Very Low	Very Low	Very Low	Very Low	Very Low	Very Low	0.072541	0	0	0	0	0	0	0	0.0634734	0	0	Very Low	Very Low	Very Low	Very Low	Very Low	Very Low	Very Low	Very Low	Very Low	Very Low	Very Low	Very Low	Very Low	13
032738/FN/02	GB620806110003	0.245006	0	0	0	0	0	0	0	0.227049	0	0	Low	Very Low	Very Low	Very Low	Very Low	Very Low	Very Low	Very Low	Low	Very Low	Very Low	Low	1.40868	0	0	0	0	0	0	0	1.2326	0	0	Very High	Very Low	Very Low	Very Low	Very Low	Very Low	Very Low	Very Low	Very High	Very Low	Very Low	Very High	Very High	12
032993/FU/01	GB620806570000	0.00537907	0	0	0	0	0	0	0	0.00487162	0	0	Very Low	Very Low	Very Low	Very Low	Very Low	Very Low	Very Low	Very Low	Very Low	Very Low	Very Low	Very Low	0.0145288	0	0	0	0	0	0	0	0.0127127	0	0	Very Low	Very Low	Very Low	Very Low	Very Low	Very Low	Very Low	Very Low	Very Low	Very Low	Very Low	Very Low	Very Low	8
033125/FN/01	GB108047004020	0.676352	0	0	0	0	0	0	0.163212	0.646463	0	0	High	Very Low	Very Low	Very Low	Very Low	Very Low	Very Low	Very Low	High	Very Low	Very Low	High	2.08978	0	0	0	0	0	0	0.195046	1.82856	0	0	Very High	Very Low	Very Low	Very Low	Very Low	Very Low	Very Low	Very Low	Very High	Very Low	Very Low	Very High	Very High	0
33938	GB108047007860	0	0	0	0	0	0	0	0	0	0	0	Very Low	Very Low	Very Low	Very Low	Very Low	Very Low	Very Low	Very Low	Very Low	Very Low	Very Low	Very Low	NA	NA	NA	NA	NA	NA	NA	NA	NA	NA	NA	NA	NA	NA	NA	NA	NA	NA	NA	NA	NA	NA	NA	Very Low	0
34544	GB530804906600	0.0179999	0	0	0	0	0	0	0.00820977	0.0217637	0	0	Very Low	Very Low	Very Low	Very Low	Very Low	Very Low	Very Low	Very Low	Very Low	Very Low	Very Low	Very Low	0.232196	0	0	0	0	0	0	0.0216716	0.203172	0	0	Low	Very Low	Very Low	Very Low	Very Low	Very Low	Very Low	Very Low	Low	Very Low	Very Low	Low	Low	2
40001	GB510080077000	0.902781	0	0	0	0	0	0	0.148549	0.590053	0.395495	0	Very High	Very Low	Very Low	Very Low	Very Low	Very Low	Very Low	Very Low	Moderate	Low	Very Low	Very High	9.28608	0	0	0	0	0	0	0.174466	1.43934	0.654246	0	Very High	Very Low	Very Low	Very Low	Very Low	Very Low	Very Low	Very Low	Very High	High	Very Low	Very High	Very High	0
40010	GB108043022490	0.293332	0	0	0	0	0	0	0.0404666	0.202887	0.143079	0	Low	Very Low	Very Low	Very Low	Very Low	Very Low	Very Low	Very Low	Low	Very Low	Very Low	Low	2.33757	0	0	0	0	0	0	0.218173	2.04537	0.166969	0	Very High	Very Low	Very Low	Very Low	Very Low	Very Low	Very Low	Low	Very High	Very Low	Very Low	Very High	Very High	0
40014	GB108043022430	0.870573	0	0	0	0	0	0	0.386481	0.854893	0.325462	0	Very High	Very Low	Very Low	Very Low	Very Low	Very Low	Very Low	Low	Very High	Low	Very Low	Very High	6.75838	0	0	0	0	0	0	0.630782	5.91358	0.482741	0	Very High	Very Low	Very Low	Very Low	Very Low	Very Low	Very Low	High	Very High	Moderate	Very Low	Very High	Very High	0
40022	GB108043016052	0.127505	0	0	0	0	0	0	0.015318	0.106017	0	0	Very Low	Very Low	Very Low	Very Low	Very Low	Very Low	Very Low	Very Low	Very Low	Very Low	Very Low	Very Low	0.58148	0	0	0	0	0	0	0.0542714	0.508795	0	0	Moderate	Very Low	Very Low	Very Low	Very Low	Very Low	Very Low	Very Low	Moderate	Very Low	Very Low	Moderate	Moderate	0
40023	GB108043016090	0.161803	0	0	0	0	0	0	0.0880051	0.160053	0.132887	0	Very Low	Very Low	Very Low	Very Low	Very Low	Very Low	Very Low	Very Low	Very Low	Very Low	Very Low	Very Low	2.14553	0	0	0	0	0	0	0.20025	1.87734	0.153252	0	Very High	Very Low	Very Low	Very Low	Very Low	Very Low	Very Low	Low	Very High	Very Low	Very Low	Very High	Very High	0
40036	GB108043015910	0	0	0	0	0	0	0	0	0	0	0	Very Low	Very Low	Very Low	Very Low	Very Low	Very Low	Very Low	Very Low	Very Low	Very Low	Very Low	Very Low	NA	NA	NA	NA	NA	NA	NA	NA	NA	NA	NA	NA	NA	NA	NA	NA	NA	NA	NA	NA	NA	NA	NA	Very Low	0
40037	GB108043015940	0.939229	0	0	0	0	0	0	0.572126	0.91244	0	0	Very High	Very Low	Very Low	Very Low	Very Low	Very Low	Very Low	Moderate	Very High	Very Low	Very Low	Very High	1.79869	0	0	0	0	0	0	0.167878	1.57386	0	0	Very High	Very Low	Very Low	Very Low	Very Low	Very Low	Very Low	Very Low	Very High	Very Low	Very Low	Very High	Very High	0
40040	GB108043016051	0	0	0	0	0	0	0	0	0	0	0	Very Low	Very Low	Very Low	Very Low	Very Low	Very Low	Very Low	Very Low	Very Low	Very Low	Very Low	Very Low	NA	NA	NA	NA	NA	NA	NA	NA	NA	NA	NA	NA	NA	NA	NA	NA	NA	NA	NA	NA	NA	NA	NA	Very Low	0
40044	GB108043022390	0.742554	0	0	0	0	0	0	0.176341	0.712237	0.262884	0	High	Very Low	Very Low	Very Low	Very Low	Very Low	Very Low	Very Low	High	Low	Very Low	High	4.99295	0	0	0	0	0	0	0.466008	4.36883	0.356639	0	Very High	Very Low	Very Low	Very Low	Very Low	Very Low	Very Low	Moderate	Very High	Low	Very Low	Very High	Very High	0
40047	GB108043015940	0	0	0	0	0	0	0	0	0	0	0	Very Low	Very Low	Very Low	Very Low	Very Low	Very Low	Very Low	Very Low	Very Low	Very Low	Very Low	Very Low	NA	NA	NA	NA	NA	NA	NA	NA	NA	NA	NA	NA	NA	NA	NA	NA	NA	NA	NA	NA	NA	NA	NA	Very Low	0
40049	GB510080077000	0	0	0	0	0	0	0	0	0	0	0	Very Low	Very Low	Very Low	Very Low	Very Low	Very Low	Very Low	Very Low	Very Low	Very Low	Very Low	Very Low	NA	NA	NA	NA	NA	NA	NA	NA	NA	NA	NA	NA	NA	NA	NA	NA	NA	NA	NA	NA	NA	NA	NA	Very Low	0
40055	GB108043015900	0	0	0	0	0	0	0	0	0	0	0	Very Low	Very Low	Very Low	Very Low	Very Low	Very Low	Very Low	Very Low	Very Low	Very Low	Very Low	Very Low	NA	NA	NA	NA	NA	NA	NA	NA	NA	NA	NA	NA	NA	NA	NA	NA	NA	NA	NA	NA	NA	NA	NA	Very Low	0
40056	GB108043022370	0.051464	0	0	0	0	0	0	0.0050384	0.0453225	0.00386048	0	Very Low	Very Low	Very Low	Very Low	Very Low	Very Low	Very Low	Very Low	Very Low	Very Low	Very Low	Very Low	0.0573314	0	0	0	0	0	0	0.00535093	0.050165	0.0040951	0	Very Low	Very Low	Very Low	Very Low	Very Low	Very Low	Very Low	Very Low	Very Low	Very Low	Very Low	Very Low	Very Low	0
40056	GB108043022430	0.000613476	0	0	0	0	0	0	0.000817038	0.000542185	0.00034402	0	Very Low	Very Low	Very Low	Very Low	Very Low	Very Low	Very Low	Very Low	Very Low	Very Low	Very Low	Very Low	0.0573314	0	0	0	0	0	0	0.00535093	0.050165	0.0040951	0	Very Low	Very Low	Very Low	Very Low	Very Low	Very Low	Very Low	Very Low	Very Low	Very Low	Very Low	Very Low	Very Low	0
40059	GB108043022450	0.326212	0	0	0	0	0	0	0.0443971	0.292543	0	0	Low	Very Low	Very Low	Very Low	Very Low	Very Low	Very Low	Very Low	Low	Very Low	Very Low	Low	0.504072	0	0	0	0	0	0	0.0470467	0.441063	0	0	Moderate	Very Low	Very Low	Very Low	Very Low	Very Low	Very Low	Very Low	Moderate	Very Low	Very Low	Moderate	Moderate	0
40067	GB108044010120	0.752843	0	0	0	0	0	0	0.601948	0.69236	0	0	High	Very Low	Very Low	Very Low	Very Low	Very Low	Very Low	High	High	Very Low	Very Low	High	6.02703	0	0	0	0	0	0	2.55692	5.27365	0	0	Very High	Very Low	Very Low	Very Low	Very Low	Very Low	Very Low	Very High	Very High	Very Low	Very Low	Very High	Very High	0
40076	GB108043016210	0	0	0	0	0	0	0	0	0	0	0	Very Low	Very Low	Very Low	Very Low	Very Low	Very Low	Very Low	Very Low	Very Low	Very Low	Very Low	Very Low	NA	NA	NA	NA	NA	NA	NA	NA	NA	NA	NA	NA	NA	NA	NA	NA	NA	NA	NA	NA	NA	NA	NA	Very Low	0
40080	GB108043022570	0.86581	0	0	0	0	0	0	0.414101	0.872104	0.357591	0	Very High	Very Low	Very Low	Very Low	Very Low	Very Low	Very Low	Moderate	Very High	Low	Very Low	Very High	7.79296	0	0	0	0	0	0	0.727343	6.81884	0.55664	0	Very High	Very Low	Very Low	Very Low	Very Low	Very Low	Very Low	High	Very High	Moderate	Very Low	Very High	Very High	0
40086	GB108043016051	0.0369959	0	0	0	0	0	0	0.00596327	0.0248817	0	0	Very Low	Very Low	Very Low	Very Low	Very Low	Very Low	Very Low	Very Low	Very Low	Very Low	Very Low	Very Low	0.47077	0	0	0	0	0	0	0.0439385	0.411924	0	0	Moderate	Very Low	Very Low	Very Low	Very Low	Very Low	Very Low	Very Low	Moderate	Very Low	Very Low	Moderate	Moderate	0
40093	GB108043015820	0.410283	0	0	0	0	0	0	0.0609754	0.378405	0	0	Moderate	Very Low	Very Low	Very Low	Very Low	Very Low	Very Low	Very Low	Low	Very Low	Very Low	Moderate	0.69573	0	0	0	0	0	0	0.0649348	0.608764	0	0	High	Very Low	Very Low	Very Low	Very Low	Very Low	Very Low	Very Low	High	Very Low	Very Low	High	High	0
40095	GB108043016200	1	0	0	0	0	0	0	1	1	1	0	Very High	Very Low	Very Low	Very Low	Very Low	Very Low	Very Low	Very High	Very High	Very High	Very Low	Very High	0.055882	0	0	0	0	0	0	0.00521565	0.0488968	0.00399157	0	Very Low	Very Low	Very Low	Very Low	Very Low	Very Low	Very Low	Very Low	Very Low	Very Low	Very Low	Very Low	Very High	0
40095	GB108043022470	0	0	0	0	0	0	0	0	0	0	0	Very Low	Very Low	Very Low	Very Low	Very Low	Very Low	Very Low	Very Low	Very Low	Very Low	Very Low	Very Low	0.055882	0	0	0	0	0	0	0.00521565	0.0488968	0.00399157	0	Very Low	Very Low	Very Low	Very Low	Very Low	Very Low	Very Low	Very Low	Very Low	Very Low	Very Low	Very Low	Very Low	0
40628	GB108043015822	1	0	0	0	0	0	0	1	1	0	0	Very High	Very Low	Very Low	Very Low	Very Low	Very Low	Very Low	Very High	Very High	Very Low	Very Low	Very High	2.66705	0	0	0	0	0	0	0.248925	2.33367	0	0	Very High	Very Low	Very Low	Very Low	Very Low	Very Low	Very Low	Low	Very High	Very Low	Very Low	Very High	Very High	0
40628	GB108043016051	0.0888141	0	0	0	0	0	0	0.0161052	0.0733078	0	0	Very Low	Very Low	Very Low	Very Low	Very Low	Very Low	Very Low	Very Low	Very Low	Very Low	Very Low	Very Low	2.66705	0	0	0	0	0	0	0.248925	2.33367	0	0	Very High	Very Low	Very Low	Very Low	Very Low	Very Low	Very Low	Low	Very High	Very Low	Very Low	Very High	Very High	0
40628	GB108043016060	1	0	0	0	0	0	0	1	1	0	0	Very High	Very Low	Very Low	Very Low	Very Low	Very Low	Very Low	Very High	Very High	Very Low	Very Low	Very High	2.66705	0	0	0	0	0	0	0.248925	2.33367	0	0	Very High	Very Low	Very Low	Very Low	Very Low	Very Low	Very Low	Low	Very High	Very Low	Very Low	Very High	Very High	0
40628	GB108043016100	0.178016	0	0	0	0	0	0	0.302231	0.134896	0	0	Very Low	Very Low	Very Low	Very Low	Very Low	Very Low	Very Low	Low	Very Low	Very Low	Very Low	Low	2.66705	0	0	0	0	0	0	0.248925	2.33367	0	0	Very High	Very Low	Very Low	Very Low	Very Low	Very Low	Very Low	Low	Very High	Very Low	Very Low	Very High	Very High	0
40628	GB108043016170	0.611185	0	0	0	0	0	0	0.119757	0.572724	0	0	High	Very Low	Very Low	Very Low	Very Low	Very Low	Very Low	Very Low	Moderate	Very Low	Very Low	High	2.66705	0	0	0	0	0	0	0.248925	2.33367	0	0	Very High	Very Low	Very Low	Very Low	Very Low	Very Low	Very Low	Low	Very High	Very Low	Very Low	Very High	Very High	0
40725	GB108044009660	0.581094	0	0	0	0	0	0	0.114628	0.548282	0	0	Moderate	Very Low	Very Low	Very Low	Very Low	Very Low	Very Low	Very Low	Moderate	Very Low	Very Low	Moderate	1.38717	0	0	0	0	0	0	0.129469	1.21377	0	0	Very High	Very Low	Very Low	Very Low	Very Low	Very Low	Very Low	Very Low	Very High	Very Low	Very Low	Very High	Very High	0
40862	GB108043015940	0.0188216	0	0	0	0	0	0	0.0171976	0.0246844	0	0	Very Low	Very Low	Very Low	Very Low	Very Low	Very Low	Very Low	Very Low	Very Low	Very Low	Very Low	Very Low	0.448676	0	0	0	0	0	0	0.0418764	0.392591	0	0	Moderate	Very Low	Very Low	Very Low	Very Low	Very Low	Very Low	Very Low	Low	Very Low	Very Low	Moderate	Moderate	0
41321	GB108043022410	0.217141	0	0	0	0	0	0	0.00916073	0.0550142	0.0201282	0	Low	Very Low	Very Low	Very Low	Very Low	Very Low	Very Low	Very Low	Very Low	Very Low	Very Low	Low	1.9946	0	0	0	0	0	0	0.0374742	0.309162	0.140528	0	Very High	Very Low	Very Low	Very Low	Very Low	Very Low	Very Low	Very Low	Low	Very Low	Very Low	Very High	Very High	0
41324	GB108044010020	0.354015	0	0	0	0	0	0	0.0417215	0.325065	0.0452885	0	Low	Very Low	Very Low	Very Low	Very Low	Very Low	Very Low	Very Low	Low	Very Low	Very Low	Low	0.664116	0	0	0	0	0	0	0.0619842	0.581102	0.0474369	0	High	Very Low	Very Low	Very Low	Very Low	Very Low	Very Low	Very Low	Moderate	Very Low	Very Low	High	High	0
41353	GB108044009691	0.0392817	0	0	0	0	0	0	0.123551	0.138105	0.0252136	0	Very Low	Very Low	Very Low	Very Low	Very Low	Very Low	Very Low	Very Low	Very Low	Very Low	Very Low	Very Low	1.95263	0	0	0	0	0	0	0.182246	1.70855	0.139474	0	Very High	Very Low	Very Low	Very Low	Very Low	Very Low	Very Low	Very Low	Very High	Very Low	Very Low	Very High	Very High	0
41354	GB108043015840	0.0991007	0	0	0	0	0	0	0.00791605	0.0159915	0.012803	0	Very Low	Very Low	Very Low	Very Low	Very Low	Very Low	Very Low	Very Low	Very Low	Very Low	Very Low	Very Low	5.36524	0	0	0	0	0	0	0.100801	0.831612	0.378005	0	Very High	Very Low	Very Low	Very Low	Very Low	Very Low	Very Low	Very Low	Very High	Low	Very Low	Very High	Very High	0
41560	GB108043022470	0.413656	0	0	0	0	0	0	0.0110867	0.128022	0.0725468	0	Moderate	Very Low	Very Low	Very Low	Very Low	Very Low	Very Low	Very Low	Very Low	Very Low	Very Low	Moderate	7.9643	0	0	0	0	0	0	0.149632	1.23447	0.561121	0	Very High	Very Low	Very Low	Very Low	Very Low	Very Low	Very Low	Very Low	Very High	Moderate	Very Low	Very High	Very High	0
41570	GB620705550000	0.000190902	0	0	0	0	0	0	0.000563432	0.000226487	0	0	Very Low	Very Low	Very Low	Very Low	Very Low	Very Low	Very Low	Very Low	Very Low	Very Low	Very Low	Very Low	0.0272439	0	0	0	0	0	0	0.00254277	0.0238384	0	0	Very Low	Very Low	Very Low	Very Low	Very Low	Very Low	Very Low	Very Low	Very Low	Very Low	Very Low	Very Low	Very Low	26
41613	GB108043022390	0.00722909	0	0	0	0	0	0	0.00549362	0.00647168	0	0	Very Low	Very Low	Very Low	Very Low	Very Low	Very Low	Very Low	Very Low	Very Low	Very Low	Very Low	Very Low	0.262951	0	0	0	0	0	0	0.0245421	0.230082	0	0	Low	Very Low	Very Low	Very Low	Very Low	Very Low	Very Low	Very Low	Low	Very Low	Very Low	Low	Low	0
41658	GB108044009590	0.0588361	0	0	0	0	0	0	0.00580081	0.051863	0	0	Very Low	Very Low	Very Low	Very Low	Very Low	Very Low	Very Low	Very Low	Very Low	Very Low	Very Low	Very Low	0.0625142	0	0	0	0	0	0	0.00583466	0.0546999	0	0	Very Low	Very Low	Very Low	Very Low	Very Low	Very Low	Very Low	Very Low	Very Low	Very Low	Very Low	Very Low	Very Low	0
41799	GB108043022510	0.653353	0	0	0	0	0	0	0.149597	0.622525	0.118653	0	High	Very Low	Very Low	Very Low	Very Low	Very Low	Very Low	Very Low	High	Very Low	Very Low	High	2.3578	0	0	0	0	0	0	0.220061	2.06307	0.168414	0	Very High	Very Low	Very Low	Very Low	Very Low	Very Low	Very Low	Low	Very High	Very Low	Very Low	Very High	Very High	0
41799	GB108043022550	1	0	0	0	0	0	0	1	1	1	0	Very High	Very Low	Very Low	Very Low	Very Low	Very Low	Very Low	Very High	Very High	Very High	Very Low	Very High	2.3578	0	0	0	0	0	0	0.220061	2.06307	0.168414	0	Very High	Very Low	Very Low	Very Low	Very Low	Very Low	Very Low	Low	Very High	Very Low	Very Low	Very High	Very High	0
42116	GB108044009630	0.483395	0	0	0	0	0	0	0.080319	0.450172	0	0	Moderate	Very Low	Very Low	Very Low	Very Low	Very Low	Very Low	Very Low	Moderate	Very Low	Very Low	Moderate	0.935717	0	0	0	0	0	0	0.0873336	0.818752	0	0	Very High	Very Low	Very Low	Very Low	Very Low	Very Low	Very Low	Very Low	Very High	Very Low	Very Low	Very High	Very High	0
42451	GB108044010080	1	0	0	0	0	0	0	1	1	0	0	Very High	Very Low	Very Low	Very Low	Very Low	Very Low	Very Low	Very High	Very High	Very Low	Very Low	Very High	0.676142	0	0	0	0	0	0	0.0631066	0.591624	0	0	High	Very Low	Very Low	Very Low	Very Low	Very Low	Very Low	Very Low	Moderate	Very Low	Very Low	High	Very High	0
42451	GB108044010100	0.379472	0	0	0	0	0	0	0.0548468	0.350071	0	0	Low	Very Low	Very Low	Very Low	Very Low	Very Low	Very Low	Very Low	Low	Very Low	Very Low	Low	0.676142	0	0	0	0	0	0	0.0631066	0.591624	0	0	High	Very Low	Very Low	Very Low	Very Low	Very Low	Very Low	Very Low	Moderate	Very Low	Very Low	High	High	0
42453	GB108044009620	0.404998	0	0	0	0	0	0	0.0597341	0.37327	0	0	Moderate	Very Low	Very Low	Very Low	Very Low	Very Low	Very Low	Very Low	Low	Very Low	Very Low	Moderate	0.680668	0	0	0	0	0	0	0.063529	0.595584	0	0	High	Very Low	Very Low	Very Low	Very Low	Very Low	Very Low	Very Low	Moderate	Very Low	Very Low	High	High	0
42464	GB108043022410	0.33773	0	0	0	0	0	0	0.0139258	0.0994385	0.0497218	0	Low	Very Low	Very Low	Very Low	Very Low	Very Low	Very Low	Very Low	Very Low	Very Low	Very Low	Low	0.758726	0	0	0	0	0	0	0.0142548	0.117602	0.0534557	0	High	Very Low	Very Low	Very Low	Very Low	Very Low	Very Low	Very Low	Very Low	Very Low	Very Low	High	High	0
42479	GB108043016051	0.000827581	0	0	0	0	0	0	0.000233442	0.000910788	0	0	Very Low	Very Low	Very Low	Very Low	Very Low	Very Low	Very Low	Very Low	Very Low	Very Low	Very Low	Very Low	0.742876	0	0	0	0	0	0	0.0693351	0.650017	0	0	High	Very Low	Very Low	Very Low	Very Low	Very Low	Very Low	Very Low	High	Very Low	Very Low	High	High	0
42479	GB108043016052	0.278251	0	0	0	0	0	0	0.0454992	0.269917	0	0	Low	Very Low	Very Low	Very Low	Very Low	Very Low	Very Low	Very Low	Low	Very Low	Very Low	Low	0.742876	0	0	0	0	0	0	0.0693351	0.650017	0	0	High	Very Low	Very Low	Very Low	Very Low	Very Low	Very Low	Very Low	High	Very Low	Very Low	High	High	0
42479	GB109053027440	0	0	0	0	0	0	0	0	0	0	0	Very Low	Very Low	Very Low	Very Low	Very Low	Very Low	Very Low	Very Low	Very Low	Very Low	Very Low	Very Low	0.742876	0	0	0	0	0	0	0.0693351	0.650017	0	0	High	Very Low	Very Low	Very Low	Very Low	Very Low	Very Low	Very Low	High	Very Low	Very Low	High	High	0
42618	GB108044009550	0.242237	0	0	0	0	0	0	0.295608	0.313346	0.243096	0	Low	Very Low	Very Low	Very Low	Very Low	Very Low	Very Low	Low	Low	Low	Very Low	Low	5.05998	0	0	0	0	0	0	0.472265	4.42748	0.361427	0	Very High	Very Low	Very Low	Very Low	Very Low	Very Low	Very Low	Moderate	Very High	Low	Very Low	Very High	Very High	0
42618	GB620806560000	0.000786274	0	0	0	0	0	0	1	0.00111554	1	0	Very Low	Very Low	Very Low	Very Low	Very Low	Very Low	Very Low	Very High	Very Low	Very High	Very Low	Very High	5.05998	0	0	0	0	0	0	0.472265	4.42748	0.361427	0	Very High	Very Low	Very Low	Very Low	Very Low	Very Low	Very Low	Moderate	Very High	Low	Very Low	Very High	Very High	8
43204	GB108043015890	0.708718	0	0	0	0	0	0	0.185064	0.680406	0.148061	0	High	Very Low	Very Low	Very Low	Very Low	Very Low	Very Low	Very Low	High	Very Low	Very Low	High	2.4331	0	0	0	0	0	0	0.22709	2.12897	0.173793	0	Very High	Very Low	Very Low	Very Low	Very Low	Very Low	Very Low	Low	Very High	Very Low	Very Low	Very High	Very High	0
70005	GB109052021640	0.00679865	0	0	0	0	0	0	0.00326114	0.0198675	0	0	Very Low	Very Low	Very Low	Very Low	Very Low	Very Low	Very Low	Very Low	Very Low	Very Low	Very Low	Very Low	0.488656	0	0	0	0	0	0	0.0456079	0.427574	0	0	Moderate	Very Low	Very Low	Very Low	Very Low	Very Low	Very Low	Very Low	Moderate	Very Low	Very Low	Moderate	Moderate	0
70006	GB108052015390	0.155952	0	0	0	0	0	0	0.260804	0.12232	0	0	Very Low	Very Low	Very Low	Very Low	Very Low	Very Low	Very Low	Low	Very Low	Very Low	Very Low	Low	2.00507	0	0	0	0	0	0	0.18714	1.75443	0	0	Very High	Very Low	Very Low	Very Low	Very Low	Very Low	Very Low	Very Low	Very High	Very Low	Very Low	Very High	Very High	0
70006	GB108052015400	1	0	0	0	0	0	0	1	1	0	0	Very High	Very Low	Very Low	Very Low	Very Low	Very Low	Very Low	Very High	Very High	Very Low	Very Low	Very High	2.00507	0	0	0	0	0	0	0.18714	1.75443	0	0	Very High	Very Low	Very Low	Very Low	Very Low	Very Low	Very Low	Very Low	Very High	Very Low	Very Low	Very High	Very High	0
70006	GB108052015481	0.0977665	0	0	0	0	0	0	0.0218418	0.0684755	0	0	Very Low	Very Low	Very Low	Very Low	Very Low	Very Low	Very Low	Very Low	Very Low	Very Low	Very Low	Very Low	2.00507	0	0	0	0	0	0	0.18714	1.75443	0	0	Very High	Very Low	Very Low	Very Low	Very Low	Very Low	Very Low	Very Low	Very High	Very Low	Very Low	Very High	Very High	0
70015	GB108052015160	0	0	0	0	0	0	0	0	0	0	0	Very Low	Very Low	Very Low	Very Low	Very Low	Very Low	Very Low	Very Low	Very Low	Very Low	Very Low	Very Low	NA	NA	NA	NA	NA	NA	NA	NA	NA	NA	NA	NA	NA	NA	NA	NA	NA	NA	NA	NA	NA	NA	NA	Very Low	0
70019	GB108052015610	0.0553603	0	0	0	0	0	0	0.0240757	0.0393632	0	0	Very Low	Very Low	Very Low	Very Low	Very Low	Very Low	Very Low	Very Low	Very Low	Very Low	Very Low	Very Low	0.369588	0	0	0	0	0	0	0.156795	0.32339	0	0	Low	Very Low	Very Low	Very Low	Very Low	Very Low	Very Low	Very Low	Low	Very Low	Very Low	Low	Low	0
70026	GB108052015520	0.0403869	0	0	0	0	0	0	0.00746404	0.034505	0	0	Very Low	Very Low	Very Low	Very Low	Very Low	Very Low	Very Low	Very Low	Very Low	Very Low	Very Low	Very Low	0.161792	0	0	0	0	0	0	0.0151006	0.141568	0	0	Very Low	Very Low	Very Low	Very Low	Very Low	Very Low	Very Low	Very Low	Very Low	Very Low	Very Low	Very Low	Very Low	0
70038	GB109052021570	0.00634823	0	0	0	0	0	0	0.031342	0.030582	0	0	Very Low	Very Low	Very Low	Very Low	Very Low	Very Low	Very Low	Very Low	Very Low	Very Low	Very Low	Very Low	1.05333	0	0	0	0	0	0	0.0983112	0.921667	0	0	Very High	Very Low	Very Low	Very Low	Very Low	Very Low	Very Low	Very Low	Very High	Very Low	Very Low	Very High	Very High	0
70053	GB108052015241	0.213011	0	0	0	0	0	0	0.0171147	0.152851	0	0	Low	Very Low	Very Low	Very Low	Very Low	Very Low	Very Low	Very Low	Very Low	Very Low	Very Low	Low	0.865608	0	0	0	0	0	0	0.0807901	0.757407	0	0	Very High	Very Low	Very Low	Very Low	Very Low	Very Low	Very Low	Very Low	High	Very Low	Very Low	Very High	Very High	0
70055	GB108052015610	0.144826	0	0	0	0	0	0	0.0839781	0.30893	0	0	Very Low	Very Low	Very Low	Very Low	Very Low	Very Low	Very Low	Very Low	Low	Very Low	Very Low	Low	4.87994	0	0	0	0	0	0	2.07028	4.26995	0	0	Very High	Very Low	Very Low	Very Low	Very Low	Very Low	Very Low	Very High	Very High	Very Low	Very Low	Very High	Very High	0
70055	GB108052015620	0.880426	0	0	0	0	0	0	0.913973	0.946546	0	0	Very High	Very Low	Very Low	Very Low	Very Low	Very Low	Very Low	Very High	Very High	Very Low	Very Low	Very High	4.87994	0	0	0	0	0	0	2.07028	4.26995	0	0	Very High	Very Low	Very Low	Very Low	Very Low	Very Low	Very Low	Very High	Very High	Very Low	Very Low	Very High	Very High	0
70055	GB108052015650	0.432047	0	0	0	0	0	0	0.463819	0.656018	0	0	Moderate	Very Low	Very Low	Very Low	Very Low	Very Low	Very Low	Moderate	High	Very Low	Very Low	High	4.87994	0	0	0	0	0	0	2.07028	4.26995	0	0	Very High	Very Low	Very Low	Very Low	Very Low	Very Low	Very Low	Very High	Very High	Very Low	Very Low	Very High	Very High	0
70055	GB108052015682	0.0268108	0	0	0	0	0	0	0.016744	0.0617641	0	0	Very Low	Very Low	Very Low	Very Low	Very Low	Very Low	Very Low	Very Low	Very Low	Very Low	Very Low	Very Low	4.87994	0	0	0	0	0	0	2.07028	4.26995	0	0	Very High	Very Low	Very Low	Very Low	Very Low	Very Low	Very Low	Very High	Very High	Very Low	Very Low	Very High	Very High	0
70063	GB108052015470	0.191842	0	0	0	0	0	0	0.00671637	0.0528372	0	0	Very Low	Very Low	Very Low	Very Low	Very Low	Very Low	Very Low	Very Low	Very Low	Very Low	Very Low	Very Low	11.0975	0	0	0	0	0	0	0.316112	2.60792	0	0	Very High	Very Low	Very Low	Very Low	Very Low	Very Low	Very Low	Low	Very High	Very Low	Very Low	Very High	Very High	0
70063	GB108052015660	1	0	0	0	0	0	0	1	1	0	0	Very High	Very Low	Very Low	Very Low	Very Low	Very Low	Very Low	Very High	Very High	Very Low	Very Low	Very High	11.0975	0	0	0	0	0	0	0.316112	2.60792	0	0	Very High	Very Low	Very Low	Very Low	Very Low	Very Low	Very Low	Low	Very High	Very Low	Very Low	Very High	Very High	0
70063	GB108052021150	0.920514	0	0	0	0	0	0	0.638623	0.775576	0	0	Very High	Very Low	Very Low	Very Low	Very Low	Very Low	Very Low	High	High	Very Low	Very Low	Very High	11.0975	0	0	0	0	0	0	0.316112	2.60792	0	0	Very High	Very Low	Very Low	Very Low	Very Low	Very Low	Very Low	Low	Very High	Very Low	Very Low	Very High	Very High	0
70073	GB108052015450	0.254149	0	0	0	0	0	0	0.0629058	0.180386	0	0	Low	Very Low	Very Low	Very Low	Very Low	Very Low	Very Low	Very Low	Very Low	Very Low	Very Low	Low	0.825298	0	0	0	0	0	0	0.0770278	0.722136	0	0	Very High	Very Low	Very Low	Very Low	Very Low	Very Low	Very Low	Very Low	High	Very Low	Very Low	Very High	Very High	0
70076	GB108052015481	0.0009263	0	0	0	0	0	0	0.000165554	0.000778534	0	0	Very Low	Very Low	Very Low	Very Low	Very Low	Very Low	Very Low	Very Low	Very Low	Very Low	Very Low	Very Low	1.20952	0	0	0	0	0	0	0.112889	1.05833	0	0	Very High	Very Low	Very Low	Very Low	Very Low	Very Low	Very Low	Very Low	Very High	Very Low	Very Low	Very High	Very High	0
70076	GB108052015510	0.16973	0	0	0	0	0	0	0.0302053	0.149422	0	0	Very Low	Very Low	Very Low	Very Low	Very Low	Very Low	Very Low	Very Low	Very Low	Very Low	Very Low	Very Low	1.20952	0	0	0	0	0	0	0.112889	1.05833	0	0	Very High	Very Low	Very Low	Very Low	Very Low	Very Low	Very Low	Very Low	Very High	Very Low	Very Low	Very High	Very High	0
70085	GB108052015330	0.266757	0	0	0	0	0	0	0.142766	0.187856	0	0	Low	Very Low	Very Low	Very Low	Very Low	Very Low	Very Low	Very Low	Very Low	Very Low	Very Low	Low	0.591171	0	0	0	0	0	0	0.2508	0.517275	0	0	Moderate	Very Low	Very Low	Very Low	Very Low	Very Low	Very Low	Low	Moderate	Very Low	Very Low	Moderate	Moderate	0
70086	GB108052021130	0	0	0	0	0	0	0	0	0	0	0	Very Low	Very Low	Very Low	Very Low	Very Low	Very Low	Very Low	Very Low	Very Low	Very Low	Very Low	Very Low	NA	NA	NA	NA	NA	NA	NA	NA	NA	NA	NA	NA	NA	NA	NA	NA	NA	NA	NA	NA	NA	NA	NA	Very Low	0
70087	GB108052021173	0.51684	0	0	0	0	0	0	0.0907764	0.48347	0.070984	0	Moderate	Very Low	Very Low	Very Low	Very Low	Very Low	Very Low	Very Low	Moderate	Very Low	Very Low	Moderate	1.06971	0	0	0	0	0	0	0.0998395	0.935995	0.0764078	0	Very High	Very Low	Very Low	Very Low	Very Low	Very Low	Very Low	Very Low	Very High	Very Low	Very Low	Very High	Very High	0
70099	GB108052015630	0.238373	0	0	0	0	0	0	0.0376029	0.23218	0	0	Low	Very Low	Very Low	Very Low	Very Low	Very Low	Very Low	Very Low	Low	Very Low	Very Low	Low	0.611907	0	0	0	0	0	0	0.0571113	0.535419	0	0	High	Very Low	Very Low	Very Low	Very Low	Very Low	Very Low	Very Low	Moderate	Very Low	Very Low	High	High	0
70112	GB108052015540	1	0	0	0	0	0	0	1	1	1	0	Very High	Very Low	Very Low	Very Low	Very Low	Very Low	Very Low	Very High	Very High	Very High	Very Low	Very High	0.612874	0	0	0	0	0	0	0.0572016	0.536265	0.0437767	0	High	Very Low	Very Low	Very Low	Very Low	Very Low	Very Low	Very Low	Moderate	Very Low	Very Low	High	Very High	0
70112	GB108052015570	0.288269	0	0	0	0	0	0	0.0364254	0.261664	0.028117	0	Low	Very Low	Very Low	Very Low	Very Low	Very Low	Very Low	Very Low	Low	Very Low	Very Low	Low	0.612874	0	0	0	0	0	0	0.0572016	0.536265	0.0437767	0	High	Very Low	Very Low	Very Low	Very Low	Very Low	Very Low	Very Low	Moderate	Very Low	Very Low	High	High	0
70112	GB108052015580	1	0	0	0	0	0	0	1	1	1	0	Very High	Very Low	Very Low	Very Low	Very Low	Very Low	Very Low	Very High	Very High	Very High	Very Low	Very High	0.612874	0	0	0	0	0	0	0.0572016	0.536265	0.0437767	0	High	Very Low	Very Low	Very Low	Very Low	Very Low	Very Low	Very Low	Moderate	Very Low	Very Low	High	Very High	0
70130	GB109052021520	0.34976	0	0	0	0	0	0	0.0982601	0.527623	0	0	Low	Very Low	Very Low	Very Low	Very Low	Very Low	Very Low	Very Low	Moderate	Very Low	Very Low	Moderate	3.74929	0	0	0	0	0	0	0.349934	3.28063	0	0	Very High	Very Low	Very Low	Very Low	Very Low	Very Low	Very Low	Low	Very High	Very Low	Very Low	Very High	Very High	0
70154	GB108052015310	0.23688	0	0	0	0	0	0	0.0261964	0.21317	0	0	Low	Very Low	Very Low	Very Low	Very Low	Very Low	Very Low	Very Low	Low	Very Low	Very Low	Low	1.07442	0	0	0	0	0	0	0.100279	0.940118	0	0	Very High	Very Low	Very Low	Very Low	Very Low	Very Low	Very Low	Very Low	Very High	Very Low	Very Low	Very High	Very High	0
70379	GB108052015450	0.437904	0	0	0	0	0	0	0.120431	0.569818	0	0	Moderate	Very Low	Very Low	Very Low	Very Low	Very Low	Very Low	Very Low	Moderate	Very Low	Very Low	Moderate	0.470089	0	0	0	0	0	0	0.043875	0.411328	0	0	Moderate	Very Low	Very Low	Very Low	Very Low	Very Low	Very Low	Very Low	Moderate	Very Low	Very Low	Moderate	Moderate	0
70379	GB540805210900	0.000299147	0	0	0	0	0	0	5e-05	0.000621492	0	0	Very Low	Very Low	Very Low	Very Low	Very Low	Very Low	Very Low	Very Low	Very Low	Very Low	Very Low	Very Low	0.470089	0	0	0	0	0	0	0.043875	0.411328	0	0	Moderate	Very Low	Very Low	Very Low	Very Low	Very Low	Very Low	Very Low	Moderate	Very Low	Very Low	Moderate	Moderate	3
71124	GB109052021640	0.00145252	0	0	0	0	0	0	0.00278694	0.00424464	0	0	Very Low	Very Low	Very Low	Very Low	Very Low	Very Low	Very Low	Very Low	Very Low	Very Low	Very Low	Very Low	3.17872	0	0	0	0	0	0	0.296681	2.78138	0	0	Very High	Very Low	Very Low	Very Low	Very Low	Very Low	Very Low	Low	Very High	Very Low	Very Low	Very High	Very High	0
71196	GB108052015590	0.0941402	0	0	0	0	0	0	0.027148	0.0797027	0	0	Very Low	Very Low	Very Low	Very Low	Very Low	Very Low	Very Low	Very Low	Very Low	Very Low	Very Low	Very Low	0.370595	0	0	0	0	0	0	0.0345888	0.32427	0	0	Low	Very Low	Very Low	Very Low	Very Low	Very Low	Very Low	Very Low	Low	Very Low	Very Low	Low	Low	0
71220	GB108052015140	0.013404	0	0	0	0	0	0	0.0130883	0.0518131	0	0	Very Low	Very Low	Very Low	Very Low	Very Low	Very Low	Very Low	Very Low	Very Low	Very Low	Very Low	Very Low	0.501779	0	0	0	0	0	0	0.0468327	0.439056	0	0	Moderate	Very Low	Very Low	Very Low	Very Low	Very Low	Very Low	Very Low	Moderate	Very Low	Very Low	Moderate	Moderate	0
71220	GB109053027371	0	0	0	0	0	0	0	0	0	0	0	Very Low	Very Low	Very Low	Very Low	Very Low	Very Low	Very Low	Very Low	Very Low	Very Low	Very Low	Very Low	0.501779	0	0	0	0	0	0	0.0468327	0.439056	0	0	Moderate	Very Low	Very Low	Very Low	Very Low	Very Low	Very Low	Very Low	Moderate	Very Low	Very Low	Moderate	Moderate	0
71221	GB108052015520	0.505554	0	0	0	0	0	0	0.0934331	0.493629	0	0	Moderate	Very Low	Very Low	Very Low	Very Low	Very Low	Very Low	Very Low	Moderate	Very Low	Very Low	Moderate	2.4729	0	0	0	0	0	0	0.230804	2.16379	0	0	Very High	Very Low	Very Low	Very Low	Very Low	Very Low	Very Low	Low	Very High	Very Low	Very Low	Very High	Very High	0
71228	GB108052015260	0.00580394	0	0	0	0	0	0	0.00135686	0.00418622	0	0	Very Low	Very Low	Very Low	Very Low	Very Low	Very Low	Very Low	Very Low	Very Low	Very Low	Very Low	Very Low	0.17267	0	0	0	0	0	0	0.0161159	0.151086	0	0	Very Low	Very Low	Very Low	Very Low	Very Low	Very Low	Very Low	Very Low	Very Low	Very Low	Very Low	Very Low	Very Low	0
71233	GB108052015180	0.573161	0	0	0	0	0	0	0.117955	0.540489	0	0	Moderate	Very Low	Very Low	Very Low	Very Low	Very Low	Very Low	Very Low	Moderate	Very Low	Very Low	Moderate	1.44276	0	0	0	0	0	0	0.134658	1.26242	0	0	Very High	Very Low	Very Low	Very Low	Very Low	Very Low	Very Low	Very Low	Very High	Very Low	Very Low	Very High	Very High	0
71609	GB108052015682	0.193054	0	0	0	0	0	0	0.0530495	0.185308	0	0	Very Low	Very Low	Very Low	Very Low	Very Low	Very Low	Very Low	Very Low	Very Low	Very Low	Very Low	Very Low	0.847577	0	0	0	0	0	0	0.0791071	0.74163	0	0	Very High	Very Low	Very Low	Very Low	Very Low	Very Low	Very Low	Very Low	High	Very Low	Very Low	Very High	Very High	0
71670	GB108052015610	0.0166545	0	0	0	0	0	0	0.0170726	0.0152254	0	0	Very Low	Very Low	Very Low	Very Low	Very Low	Very Low	Very Low	Very Low	Very Low	Very Low	Very Low	Very Low	0.0635887	0	0	0	0	0	0	0.0635887	0.0635887	0	0	Very Low	Very Low	Very Low	Very Low	Very Low	Very Low	Very Low	Very Low	Very Low	Very Low	Very Low	Very Low	Very Low	0
71670	GB108052015682	0.00209287	0	0	0	0	0	0	0.00231067	0.00206629	0	0	Very Low	Very Low	Very Low	Very Low	Very Low	Very Low	Very Low	Very Low	Very Low	Very Low	Very Low	Very Low	0.0635887	0	0	0	0	0	0	0.0635887	0.0635887	0	0	Very Low	Very Low	Very Low	Very Low	Very Low	Very Low	Very Low	Very Low	Very Low	Very Low	Very Low	Very Low	Very Low	0
71740	GB108052015630	0.00692657	0	0	0	0	0	0	0.00109265	0.00674661	0	0	Very Low	Very Low	Very Low	Very Low	Very Low	Very Low	Very Low	Very Low	Very Low	Very Low	Very Low	Very Low	1.23495	0	0	0	0	0	0	0.115262	1.08058	0	0	Very High	Very Low	Very Low	Very Low	Very Low	Very Low	Very Low	Very Low	Very High	Very Low	Very Low	Very High	Very High	0
71798	GB108052021221	0.000243035	0	0	0	0	0	0	7.76e-05	0.000220519	0	2.33e-05	Very Low	Very Low	Very Low	Very Low	Very Low	Very Low	Very Low	Very Low	Very Low	Very Low	Very Low	Very Low	0.0109074	0	0	0	0	0	0	0.00101803	0.009544	0	0.00131641	Very Low	Very Low	Very Low	Very Low	Very Low	Very Low	Very Low	Very Low	Very Low	Very Low	Very Low	Very Low	Very Low	0
71853	GB108052015220	0.727658	0	0	0	0	0	0	0.35649	0.721741	0	0	High	Very Low	Very Low	Very Low	Very Low	Very Low	Very Low	Low	High	Very Low	Very Low	High	1.93718	0	0	0	0	0	0	0.180803	1.69503	0	0	Very High	Very Low	Very Low	Very Low	Very Low	Very Low	Very Low	Very Low	Very High	Very Low	Very Low	Very High	Very High	0
71889	GB108051020250	0.0229002	0	0	0	0	0	0	0.131492	0.0336262	0	0	Very Low	Very Low	Very Low	Very Low	Very Low	Very Low	Very Low	Very Low	Very Low	Very Low	Very Low	Very Low	1.62214	0	0	0	0	0	0	0.1514	1.41937	0	0	Very High	Very Low	Very Low	Very Low	Very Low	Very Low	Very Low	Very Low	Very High	Very Low	Very Low	Very High	Very High	0
71901	GB109052021540	0.574691	0	0	0	0	0	0	0.111991	0.541773	0.0880209	0	Moderate	Very Low	Very Low	Very Low	Very Low	Very Low	Very Low	Very Low	Moderate	Very Low	Very Low	Moderate	1.35123	0	0	0	0	0	0	0.126115	1.18233	0.0965164	0	Very High	Very Low	Very Low	Very Low	Very Low	Very Low	Very Low	Very Low	Very High	Very Low	Very Low	Very High	Very High	0
71977	GB109052021580	0.617183	0	0	0	0	0	0	0.130792	0.58518	0	0	High	Very Low	Very Low	Very Low	Very Low	Very Low	Very Low	Very Low	Moderate	Very Low	Very Low	High	1.627	0	0	0	0	0	0	0.151853	1.42362	0	0	Very High	Very Low	Very Low	Very Low	Very Low	Very Low	Very Low	Very Low	Very High	Very Low	Very Low	Very High	Very High	0
71977	GB109052021620	0.000424896	0	0	0	0	0	0	1	0.00188567	0	0	Very Low	Very Low	Very Low	Very Low	Very Low	Very Low	Very Low	Very High	Very Low	Very Low	Very Low	Very High	1.627	0	0	0	0	0	0	0.151853	1.42362	0	0	Very High	Very Low	Very Low	Very Low	Very Low	Very Low	Very Low	Very Low	Very High	Very Low	Very Low	Very High	Very High	0
71978	GB108052021171	0.624687	0	0	0	0	0	0	0.838746	0.555226	0	0	High	Very Low	Very Low	Very Low	Very Low	Very Low	Very Low	Very High	Moderate	Very Low	Very Low	Very High	3.92674	0	0	0	0	0	0	0.366496	3.4359	0	0	Very High	Very Low	Very Low	Very Low	Very Low	Very Low	Very Low	Low	Very High	Very Low	Very Low	Very High	Very High	0
71978	GB108052021182	0.781199	0	0	0	0	0	0	0.249944	0.757521	0	0	High	Very Low	Very Low	Very Low	Very Low	Very Low	Very Low	Low	High	Very Low	Very Low	High	3.92674	0	0	0	0	0	0	0.366496	3.4359	0	0	Very High	Very Low	Very Low	Very Low	Very Low	Very Low	Very Low	Low	Very High	Very Low	Very Low	Very High	Very High	0
71989	GB108052021390	0.000162222	0	0	0	0	0	0	0.00151304	0.000144345	0	0	Very Low	Very Low	Very Low	Very Low	Very Low	Very Low	Very Low	Very Low	Very Low	Very Low	Very Low	Very Low	0.0526263	0	0	0	0	0	0	0.0526263	0.0526263	0	0	Very Low	Very Low	Very Low	Very Low	Very Low	Very Low	Very Low	Very Low	Very Low	Very Low	Very Low	Very Low	Very Low	0
72054	GB109052021570	0.00187585	0	0	0	0	0	0	0.00926134	0.00677758	0	0	Very Low	Very Low	Very Low	Very Low	Very Low	Very Low	Very Low	Very Low	Very Low	Very Low	Very Low	Very Low	0.154901	0	0	0	0	0	0	0.0144575	0.135539	0	0	Very Low	Very Low	Very Low	Very Low	Very Low	Very Low	Very Low	Very Low	Very Low	Very Low	Very Low	Very Low	Very Low	0
72317	GB108052015170	0.0986629	0	0	0	0	0	0	0.0101132	0.0874081	0	0	Very Low	Very Low	Very Low	Very Low	Very Low	Very Low	Very Low	Very Low	Very Low	Very Low	Very Low	Very Low	0.109463	0	0	0	0	0	0	0.0102165	0.09578	0	0	Very Low	Very Low	Very Low	Very Low	Very Low	Very Low	Very Low	Very Low	Very Low	Very Low	Very Low	Very Low	Very Low	0
72344	GB108052015650	0.314818	0	0	0	0	0	0	0.055765	0.179257	0.0815863	0	Low	Very Low	Very Low	Very Low	Very Low	Very Low	Very Low	Very Low	Very Low	Very Low	Very Low	Low	1.24368	0	0	0	0	0	0	0.116076	1.08822	0.088834	0	Very High	Very Low	Very Low	Very Low	Very Low	Very Low	Very Low	Very Low	Very High	Very Low	Very Low	Very High	Very High	0
72373	GB108052015630	0.008114	0	0	0	0	0	0	0.00119464	0.00790319	0	0	Very Low	Very Low	Very Low	Very Low	Very Low	Very Low	Very Low	Very Low	Very Low	Very Low	Very Low	Very Low	0.304462	0	0	0	0	0	0	0.0284164	0.266404	0	0	Low	Very Low	Very Low	Very Low	Very Low	Very Low	Very Low	Very Low	Low	Very Low	Very Low	Low	Low	0
72493	GB108052015180	0.0295736	0	0	0	0	0	0	0.00608617	0.0313738	0	0	Very Low	Very Low	Very Low	Very Low	Very Low	Very Low	Very Low	Very Low	Very Low	Very Low	Very Low	Very Low	0.59448	0	0	0	0	0	0	0.0554848	0.52017	0	0	Moderate	Very Low	Very Low	Very Low	Very Low	Very Low	Very Low	Very Low	Moderate	Very Low	Very Low	Moderate	Moderate	0
72493	GB108052015220	0.0840339	0	0	0	0	0	0	0.0257309	0.0781411	0	0	Very Low	Very Low	Very Low	Very Low	Very Low	Very Low	Very Low	Very Low	Very Low	Very Low	Very Low	Very Low	0.59448	0	0	0	0	0	0	0.0554848	0.52017	0	0	Moderate	Very Low	Very Low	Very Low	Very Low	Very Low	Very Low	Very Low	Moderate	Very Low	Very Low	Moderate	Moderate	0
72535	GB108052021380	0.160445	0	0	0	0	0	0	0.0139295	0.174715	0	0	Very Low	Very Low	Very Low	Very Low	Very Low	Very Low	Very Low	Very Low	Very Low	Very Low	Very Low	Very Low	0.302251	0	0	0	0	0	0	0.0282101	0.264469	0	0	Low	Very Low	Very Low	Very Low	Very Low	Very Low	Very Low	Very Low	Low	Very Low	Very Low	Low	Low	0
100288	GB108052015230	1	0	0	0	0	0	0	1	1	0	0	Very High	Very Low	Very Low	Very Low	Very Low	Very Low	Very Low	Very High	Very High	Very Low	Very Low	Very High	2.35945	0	0	0	0	0	0	0.220215	2.06452	0	0	Very High	Very Low	Very Low	Very Low	Very Low	Very Low	Very Low	Low	Very High	Very Low	Very Low	Very High	Very High	0
100288	GB108052015350	0.686029	0	0	0	0	0	0	0.16939	0.656579	0	0	High	Very Low	Very Low	Very Low	Very Low	Very Low	Very Low	Very Low	High	Very Low	Very Low	High	2.35945	0	0	0	0	0	0	0.220215	2.06452	0	0	Very High	Very Low	Very Low	Very Low	Very Low	Very Low	Very Low	Low	Very High	Very Low	Very Low	Very High	Very High	0
100288	GB108052015360	0.396122	0	0	0	0	0	0	0.424612	0.290768	0	0	Low	Very Low	Very Low	Very Low	Very Low	Very Low	Very Low	Moderate	Low	Very Low	Very Low	Moderate	2.35945	0	0	0	0	0	0	0.220215	2.06452	0	0	Very High	Very Low	Very Low	Very Low	Very Low	Very Low	Very Low	Low	Very High	Very Low	Very Low	Very High	Very High	0
100318	GB108051020300	0.717064	0	0	0	0	0	0	0	0.466083	0	0	High	Very Low	Very Low	Very Low	Very Low	Very Low	Very Low	Very Low	Moderate	Very Low	Very Low	High	2.53437	0	0	0	0	0	0	0	0.87295	0	0	Very High	Very Low	Very Low	Very Low	Very Low	Very Low	Very Low	Very Low	Very High	Very Low	Very Low	Very High	Very High	0
100318	GB610807680004	0	0	0	0	0	0	0	0	0	0	0	Very Low	Very Low	Very Low	Very Low	Very Low	Very Low	Very Low	Very Low	Very Low	Very Low	Very Low	Very Low	2.53437	0	0	0	0	0	0	0	0.87295	0	0	Very High	Very Low	Very Low	Very Low	Very Low	Very Low	Very Low	Very Low	Very High	Very Low	Very Low	Very High	Very High	6
100334/FU/01	GB109052021570	0.973639	0	0	0	0	0	0	0	0.879454	0	0	Very High	Very Low	Very Low	Very Low	Very Low	Very Low	Very Low	Very Low	Very High	Very Low	Very Low	Very High	1.27265	0	0	0	0	0	0	0	1.11357	0	0	Very High	Very Low	Very Low	Very Low	Very Low	Very Low	Very Low	Very Low	Very High	Very Low	Very Low	Very High	Very High	0
100334/FU/01	GB109052021590	1	0	0	0	0	0	0	0	1	0	0	Very High	Very Low	Very Low	Very Low	Very Low	Very Low	Very Low	Very Low	Very High	Very Low	Very Low	Very High	1.27265	0	0	0	0	0	0	0	1.11357	0	0	Very High	Very Low	Very Low	Very Low	Very Low	Very Low	Very Low	Very Low	Very High	Very Low	Very Low	Very High	Very High	0
100334/FU/01	GB109052021620	0.999575	0	0	0	0	0	0	0	0.998114	0	0	Very High	Very Low	Very Low	Very Low	Very Low	Very Low	Very Low	Very Low	Very High	Very Low	Very Low	Very High	1.27265	0	0	0	0	0	0	0	1.11357	0	0	Very High	Very Low	Very Low	Very Low	Very Low	Very Low	Very Low	Very Low	Very High	Very Low	Very Low	Very High	Very High	0
100334/FU/01	GB109052021640	0.882098	0	0	0	0	0	0	0	0.644431	0	0	Very High	Very Low	Very Low	Very Low	Very Low	Very Low	Very Low	Very Low	High	Very Low	Very Low	Very High	1.27265	0	0	0	0	0	0	0	1.11357	0	0	Very High	Very Low	Very Low	Very Low	Very Low	Very Low	Very Low	Very Low	Very High	Very Low	Very Low	Very High	Very High	0
100334/FU/01	GB540805210900	0.0519742	0	0	0	0	0	0	0	0.0220866	0	0	Very Low	Very Low	Very Low	Very Low	Very Low	Very Low	Very Low	Very Low	Very Low	Very Low	Very Low	Very Low	1.27265	0	0	0	0	0	0	0	1.11357	0	0	Very High	Very Low	Very Low	Very Low	Very Low	Very Low	Very Low	Very Low	Very High	Very Low	Very Low	Very High	Very High	3
100334/FU/01	GB640807670000	0	0	0	0	0	0	0	0	0	0	0	Very Low	Very Low	Very Low	Very Low	Very Low	Very Low	Very Low	Very Low	Very Low	Very Low	Very Low	Very Low	1.27265	0	0	0	0	0	0	0	1.11357	0	0	Very High	Very Low	Very Low	Very Low	Very Low	Very Low	Very Low	Very Low	Very High	Very Low	Very Low	Very High	Very High	3
100385	GB10905202733	1	0	0	0	0	0	0	0	1	0	0	Very High	Very Low	Very Low	Very Low	Very Low	Very Low	Very Low	Very Low	Very High	Very Low	Very Low	Very High	2.06778	0	0	0	0	0	0	0	1.80931	0	0	Very High	Very Low	Very Low	Very Low	Very Low	Very Low	Very Low	Very Low	Very High	Very Low	Very Low	Very High	Very High	0
100385	GB109052027330	1	0	0	0	0	0	0	0	1	0	0	Very High	Very Low	Very Low	Very Low	Very Low	Very Low	Very Low	Very Low	Very High	Very Low	Very Low	Very High	2.06778	0	0	0	0	0	0	0	1.80931	0	0	Very High	Very Low	Very Low	Very Low	Very Low	Very Low	Very Low	Very Low	Very High	Very Low	Very Low	Very High	Very High	0
100385	GB530905415405	0.0277522	0	0	0	0	0	0	0	0.0263753	0	0	Very Low	Very Low	Very Low	Very Low	Very Low	Very Low	Very Low	Very Low	Very Low	Very Low	Very Low	Very Low	2.06778	0	0	0	0	0	0	0	1.80931	0	0	Very High	Very Low	Very Low	Very Low	Very Low	Very Low	Very Low	Very Low	Very High	Very Low	Very Low	Very High	Very High	0
100386	GB108051020210	1	0	0	0	0	0	0	0	1	0	0	Very High	Very Low	Very Low	Very Low	Very Low	Very Low	Very Low	Very Low	Very High	Very Low	Very Low	Very High	0.563315	0	0	0	0	0	0	0	0.492901	0	0	Moderate	Very Low	Very Low	Very Low	Very Low	Very Low	Very Low	Very Low	Moderate	Very Low	Very Low	Moderate	Very High	0
100386	GB108051020230	1	0	0	0	0	0	0	0	1	0	0	Very High	Very Low	Very Low	Very Low	Very Low	Very Low	Very Low	Very Low	Very High	Very Low	Very Low	Very High	0.563315	0	0	0	0	0	0	0	0.492901	0	0	Moderate	Very Low	Very Low	Very Low	Very Low	Very Low	Very Low	Very Low	Moderate	Very Low	Very Low	Moderate	Very High	0
100386	GB108051020390	1	0	0	0	0	0	0	0	1	0	0	Very High	Very Low	Very Low	Very Low	Very Low	Very Low	Very Low	Very Low	Very High	Very Low	Very Low	Very High	0.563315	0	0	0	0	0	0	0	0.492901	0	0	Moderate	Very Low	Very Low	Very Low	Very Low	Very Low	Very Low	Very Low	Moderate	Very Low	Very Low	Moderate	Very High	0
100386	GB640807670000	0.117884	0	0	0	0	0	0	0	0.0494676	0	0	Very Low	Very Low	Very Low	Very Low	Very Low	Very Low	Very Low	Very Low	Very Low	Very Low	Very Low	Very Low	0.563315	0	0	0	0	0	0	0	0.492901	0	0	Moderate	Very Low	Very Low	Very Low	Very Low	Very Low	Very Low	Very Low	Moderate	Very Low	Very Low	Moderate	Moderate	3
100673	GB109053027740	0.737084	0	0	0	0	0	0	0.0507819	0.299325	0	0	High	Very Low	Very Low	Very Low	Very Low	Very Low	Very Low	Very Low	Low	Very Low	Very Low	High	3.07965	0	0	0	0	0	0	0.0578602	0.477346	0	0	Very High	Very Low	Very Low	Very Low	Very Low	Very Low	Very Low	Very Low	Moderate	Very Low	Very Low	Very High	Very High	0
100854	GB109053027640	0.795619	0	0	0	0	0	0	0.0687576	0.385345	0.243705	0	High	Very Low	Very Low	Very Low	Very Low	Very Low	Very Low	Very Low	Low	Low	Very Low	High	4.57366	0	0	0	0	0	0	0.0859294	0.708917	0.322235	0	Very High	Very Low	Very Low	Very Low	Very Low	Very Low	Very Low	Very Low	High	Low	Very Low	Very High	Very High	0
100881	GB108052021181	0.96969	0	0	0	0	0	0	0	0.959991	0	0	Very High	Very Low	Very Low	Very Low	Very Low	Very Low	Very Low	Very Low	Very High	Very Low	Very Low	Very High	2.55705	0	0	0	0	0	0	0	2.23741	0	0	Very High	Very Low	Very Low	Very Low	Very Low	Very Low	Very Low	Very Low	Very High	Very Low	Very Low	Very High	Very High	0
100881	GB108052021210	1	0	0	0	0	0	0	0	1	0	0	Very High	Very Low	Very Low	Very Low	Very Low	Very Low	Very Low	Very Low	Very High	Very Low	Very Low	Very High	2.55705	0	0	0	0	0	0	0	2.23741	0	0	Very High	Very Low	Very Low	Very Low	Very Low	Very Low	Very Low	Very Low	Very High	Very Low	Very Low	Very High	Very High	0
100881	GB108052021250	1	0	0	0	0	0	0	0	1	0	0	Very High	Very Low	Very Low	Very Low	Very Low	Very Low	Very Low	Very Low	Very High	Very Low	Very Low	Very High	2.55705	0	0	0	0	0	0	0	2.23741	0	0	Very High	Very Low	Very Low	Very Low	Very Low	Very Low	Very Low	Very Low	Very High	Very Low	Very Low	Very High	Very High	0
100881	GB540805210900	0.00712303	0	0	0	0	0	0	0	0.0121078	0	0	Very Low	Very Low	Very Low	Very Low	Very Low	Very Low	Very Low	Very Low	Very Low	Very Low	Very Low	Very Low	2.55705	0	0	0	0	0	0	0	2.23741	0	0	Very High	Very Low	Very Low	Very Low	Very Low	Very Low	Very Low	Very Low	Very High	Very Low	Very Low	Very High	Very High	3
100930	GB108052021150	0.0794865	0	0	0	0	0	0	0.361377	0.224424	0	0	Very Low	Very Low	Very Low	Very Low	Very Low	Very Low	Very Low	Low	Low	Very Low	Very Low	Low	0.130004	0	0	0	0	0	0	0.0121337	0.113753	0	0	Very Low	Very Low	Very Low	Very Low	Very Low	Very Low	Very Low	Very Low	Very Low	Very Low	Very Low	Very Low	Low	0
100930	GB540805210900	0.00978787	0	0	0	0	0	0	0.00490636	0.0166376	0	0	Very Low	Very Low	Very Low	Very Low	Very Low	Very Low	Very Low	Very Low	Very Low	Very Low	Very Low	Very Low	0.130004	0	0	0	0	0	0	0.0121337	0.113753	0	0	Very Low	Very Low	Very Low	Very Low	Very Low	Very Low	Very Low	Very Low	Very Low	Very Low	Very Low	Very Low	Very Low	3
100930	GB70810069	1	0	0	0	0	0	0	1	1	0	0	Very High	Very Low	Very Low	Very Low	Very Low	Very Low	Very Low	Very High	Very High	Very Low	Very Low	Very High	0.130004	0	0	0	0	0	0	0.0121337	0.113753	0	0	Very Low	Very Low	Very Low	Very Low	Very Low	Very Low	Very Low	Very Low	Very Low	Very Low	Very Low	Very Low	Very High	0
101049	GB109052027321	0	0	0	0	0	0	0	0	0	0	0	Very Low	Very Low	Very Low	Very Low	Very Low	Very Low	Very Low	Very Low	Very Low	Very Low	Very Low	Very Low	0.2347	0	0	0	0	0	0	0	0.205363	0	0	Low	Very Low	Very Low	Very Low	Very Low	Very Low	Very Low	Very Low	Low	Very Low	Very Low	Low	Low	0
101049	GB530905415405	0.0034386	0	0	0	0	0	0	0	0.000784318	0	0	Very Low	Very Low	Very Low	Very Low	Very Low	Very Low	Very Low	Very Low	Very Low	Very Low	Very Low	Very Low	0.2347	0	0	0	0	0	0	0	0.205363	0	0	Low	Very Low	Very Low	Very Low	Very Low	Very Low	Very Low	Very Low	Low	Very Low	Very Low	Low	Low	0
101327	GB108052015160	0.50677	0	0	0.0377292	0	0	0	0.0172029	0.137012	0	0	Moderate	Very Low	Very Low	Very Low	Very Low	Very Low	Very Low	Very Low	Very Low	Very Low	Very Low	Moderate	1.05737	0	0	0.0392085	0	0	0	0.0198657	0.163892	0	0	Very High	Very Low	Very Low	Very Low	Very Low	Very Low	Very Low	Very Low	Very Low	Very Low	Very Low	Very High	Very High	0
101331	GB108052015590	0.651835	0	0	0	0	0	0	0.187975	0.674506	0	0	High	Very Low	Very Low	Very Low	Very Low	Very Low	Very Low	Very Low	High	Very Low	Very Low	High	1.2536	0	0	0	0	0	0	0.117002	1.0969	0	0	Very High	Very Low	Very Low	Very Low	Very Low	Very Low	Very Low	Very Low	Very High	Very Low	Very Low	Very High	Very High	0
101331	GB108052015600	1	0	0	0	0	0	0	1	1	0	0	Very High	Very Low	Very Low	Very Low	Very Low	Very Low	Very Low	Very High	Very High	Very Low	Very Low	Very High	1.2536	0	0	0	0	0	0	0.117002	1.0969	0	0	Very High	Very Low	Very Low	Very Low	Very Low	Very Low	Very Low	Very Low	Very High	Very Low	Very Low	Very High	Very High	0
101331	GB108052015681	0.187566	0	0	0	0	0	0	0.0210932	0.16806	0	0	Very Low	Very Low	Very Low	Very Low	Very Low	Very Low	Very Low	Very Low	Very Low	Very Low	Very Low	Very Low	1.2536	0	0	0	0	0	0	0.117002	1.0969	0	0	Very High	Very Low	Very Low	Very Low	Very Low	Very Low	Very Low	Very Low	Very High	Very Low	Very Low	Very High	Very High	0
101332	GB108052015380	0.974975	0	0	0	0	0	0	1	0.974278	0	0	Very High	Very Low	Very Low	Very Low	Very Low	Very Low	Very Low	Very High	Very High	Very Low	Very Low	Very High	0.383084	0	0	0	0	0	0	0.0357545	0.335199	0	0	Low	Very Low	Very Low	Very Low	Very Low	Very Low	Very Low	Very Low	Low	Very Low	Very Low	Low	Very High	0
101332	GB108052015390	0.828773	0	0	0	0	0	0	0.739196	0.866726	0	0	Very High	Very Low	Very Low	Very Low	Very Low	Very Low	Very Low	High	Very High	Very Low	Very Low	Very High	0.383084	0	0	0	0	0	0	0.0357545	0.335199	0	0	Low	Very Low	Very Low	Very Low	Very Low	Very Low	Very Low	Very Low	Low	Very Low	Very Low	Low	Very High	0
101332	GB108052015481	0.142627	0	0	0	0	0	0	0.0169941	0.133194	0	0	Very Low	Very Low	Very Low	Very Low	Very Low	Very Low	Very Low	Very Low	Very Low	Very Low	Very Low	Very Low	0.383084	0	0	0	0	0	0	0.0357545	0.335199	0	0	Low	Very Low	Very Low	Very Low	Very Low	Very Low	Very Low	Very Low	Low	Very Low	Very Low	Low	Low	0
101431	GB108052021130	1	0	0	0	0	0	0	1	1	0	0	Very High	Very Low	Very Low	Very Low	Very Low	Very Low	Very Low	Very High	Very High	Very Low	Very Low	Very High	1.38705	0	0	0	0	0	0	0.129458	1.21367	0	0	Very High	Very Low	Very Low	Very Low	Very Low	Very Low	Very Low	Very Low	Very High	Very Low	Very Low	Very High	Very High	0
101431	GB108052021171	0.375313	0	0	0	0	0	0	0.161254	0.444774	0	0	Low	Very Low	Very Low	Very Low	Very Low	Very Low	Very Low	Very Low	Moderate	Very Low	Very Low	Moderate	1.38705	0	0	0	0	0	0	0.129458	1.21367	0	0	Very High	Very Low	Very Low	Very Low	Very Low	Very Low	Very Low	Very Low	Very High	Very Low	Very Low	Very High	Very High	0
101431	GB108052021181	0.0303101	0	0	0	0	0	0	1	0.0400092	0	0	Very Low	Very Low	Very Low	Very Low	Very Low	Very Low	Very Low	Very High	Very Low	Very Low	Very Low	Very High	1.38705	0	0	0	0	0	0	0.129458	1.21367	0	0	Very High	Very Low	Very Low	Very Low	Very Low	Very Low	Very Low	Very Low	Very High	Very Low	Very Low	Very High	Very High	0
101431	GB108052021190	0.500383	0	0	0	0	0	0	0.0823132	0.468265	0	0	Moderate	Very Low	Very Low	Very Low	Very Low	Very Low	Very Low	Very Low	Moderate	Very Low	Very Low	Moderate	1.38705	0	0	0	0	0	0	0.129458	1.21367	0	0	Very High	Very Low	Very Low	Very Low	Very Low	Very Low	Very Low	Very Low	Very High	Very Low	Very Low	Very High	Very High	0
101432	GB108052021221	0.243788	0	0	0	0	0	0	0.0189984	0.0633691	0	0	Low	Very Low	Very Low	Very Low	Very Low	Very Low	Very Low	Very Low	Very Low	Very Low	Very Low	Low	1.34792	0	0	0	0	0	0	0.0383953	0.316761	0	0	Very High	Very Low	Very Low	Very Low	Very Low	Very Low	Very Low	Very Low	Low	Very Low	Very Low	Very High	Very High	0
101432	GB108052021240	0.318765	0	0	0	0	0	0	0.0131534	0.0990681	0	0	Low	Very Low	Very Low	Very Low	Very Low	Very Low	Very Low	Very Low	Very Low	Very Low	Very Low	Low	1.34792	0	0	0	0	0	0	0.0383953	0.316761	0	0	Very High	Very Low	Very Low	Very Low	Very Low	Very Low	Very Low	Very Low	Low	Very Low	Very Low	Very High	Very High	0
101432	GB109052021520	0.439183	0	0	0	0	0	0	0.0301245	0.142347	0	0	Moderate	Very Low	Very Low	Very Low	Very Low	Very Low	Very Low	Very Low	Very Low	Very Low	Very Low	Moderate	1.34792	0	0	0	0	0	0	0.0383953	0.316761	0	0	Very High	Very Low	Very Low	Very Low	Very Low	Very Low	Very Low	Very Low	Low	Very Low	Very Low	Very High	Very High	0
101438	GB108052021340	0.264871	0	0	0	0	0	0	0.0325344	0.239698	0	0	Low	Very Low	Very Low	Very Low	Very Low	Very Low	Very Low	Very Low	Low	Very Low	Very Low	Low	0.360305	0	0	0	0	0	0	0.0336284	0.315267	0	0	Low	Very Low	Very Low	Very Low	Very Low	Very Low	Very Low	Very Low	Low	Very Low	Very Low	Low	Low	0
101440	GB109053022130	0.132831	0	0	0	0	0	0	0.0140951	0.118189	0	0	Very Low	Very Low	Very Low	Very Low	Very Low	Very Low	Very Low	Very Low	Very Low	Very Low	Very Low	Very Low	0.153178	0	0	0	0	0	0	0.0142966	0.13403	0	0	Very Low	Very Low	Very Low	Very Low	Very Low	Very Low	Very Low	Very Low	Very Low	Very Low	Very Low	Very Low	Very Low	0
101441	GB109053027730	0.454621	0	0	0	0	0	0	0.150529	0.407068	0	0	Moderate	Very Low	Very Low	Very Low	Very Low	Very Low	Very Low	Very Low	Moderate	Very Low	Very Low	Moderate	2.49438	0	0	0	0	0	0	0.232809	2.18258	0	0	Very High	Very Low	Very Low	Very Low	Very Low	Very Low	Very Low	Low	Very High	Very Low	Very Low	Very High	Very High	0
101442	GB108052021310	0.480064	0	0	0	0	0	0	0.0793389	0.446872	0	0	Moderate	Very Low	Very Low	Very Low	Very Low	Very Low	Very Low	Very Low	Moderate	Very Low	Very Low	Moderate	1.21322	0	0	0	0	0	0	0.113234	1.06157	0	0	Very High	Very Low	Very Low	Very Low	Very Low	Very Low	Very Low	Very Low	Very High	Very Low	Very Low	Very High	Very High	0
101442	GB540805210900	0.00162076	0	0	0	0	0	0	0.000203109	0.00275499	0	0	Very Low	Very Low	Very Low	Very Low	Very Low	Very Low	Very Low	Very Low	Very Low	Very Low	Very Low	Very Low	1.21322	0	0	0	0	0	0	0.113234	1.06157	0	0	Very High	Very Low	Very Low	Very Low	Very Low	Very Low	Very Low	Very Low	Very High	Very Low	Very Low	Very High	Very High	3
101456	GB108052015260	0.638001	0	0	0	0	0	0	0.417213	0.613563	0	0	High	Very Low	Very Low	Very Low	Very Low	Very Low	Very Low	Moderate	High	Very Low	Very Low	High	1.9778	0	0	0	0	0	0	0.839066	1.73057	0	0	Very High	Very Low	Very Low	Very Low	Very Low	Very Low	Very Low	Very High	Very High	Very Low	Very Low	Very High	Very High	0
101462	GB109053022220	0.257626	0	0	0	0	0	0	0.00849707	0.0692207	0	0	Low	Very Low	Very Low	Very Low	Very Low	Very Low	Very Low	Very Low	Very Low	Very Low	Very Low	Low	0.57767	0	0	0	0	0	0	0.0108532	0.0895388	0	0	Moderate	Very Low	Very Low	Very Low	Very Low	Very Low	Very Low	Very Low	Very Low	Very Low	Very Low	Moderate	Moderate	0
101480	GB109052021640	0.0233506	0	0	0	0	0	0	0.0448029	0.0606549	0	0	Very Low	Very Low	Very Low	Very Low	Very Low	Very Low	Very Low	Very Low	Very Low	Very Low	Very Low	Very Low	2.08703	0	0	0	0	0	0	0.194789	1.82615	0	0	Very High	Very Low	Very Low	Very Low	Very Low	Very Low	Very Low	Very Low	Very High	Very Low	Very Low	Very High	Very High	0
101543	GB108052021221	0.585063	0	0	0	0	0	0	0.565882	0.707812	0	0.303585	Moderate	Very Low	Very Low	Very Low	Very Low	Very Low	Very Low	Moderate	High	Very Low	Low	High	3.93653	0	0	0	0	0	0	1.67004	3.44446	0	0.447333	Very High	Very Low	Very Low	Very Low	Very Low	Very Low	Very Low	Very High	Very High	Very Low	Moderate	Very High	Very High	0
101620	GB108052015290	0.0161512	0	0	0	0	0	0	0.00350748	0.0198598	0	0	Very Low	Very Low	Very Low	Very Low	Very Low	Very Low	Very Low	Very Low	Very Low	Very Low	Very Low	Very Low	0.244224	0	0	0	0	0	0	0.0227943	0.213696	0	0	Low	Very Low	Very Low	Very Low	Very Low	Very Low	Very Low	Very Low	Low	Very Low	Very Low	Low	Low	0
101620	GB108052015330	0.0246254	0	0	0	0	0	0	0.00254895	0.0346834	0	0	Very Low	Very Low	Very Low	Very Low	Very Low	Very Low	Very Low	Very Low	Very Low	Very Low	Very Low	Very Low	0.244224	0	0	0	0	0	0	0.0227943	0.213696	0	0	Low	Very Low	Very Low	Very Low	Very Low	Very Low	Very Low	Very Low	Low	Very Low	Very Low	Low	Low	0
101637	GB109053027440	0.600509	0	0	0	0	0	0	0.0982249	0.37335	0	0	High	Very Low	Very Low	Very Low	Very Low	Very Low	Very Low	Very Low	Low	Very Low	Very Low	High	7.20263	0	0	0	0	0	0	0.135322	1.11641	0	0	Very High	Very Low	Very Low	Very Low	Very Low	Very Low	Very Low	Very Low	Very High	Very Low	Very Low	Very High	Very High	0
101640	GB108052021360	0.626179	0	0	0	0	0	0	0.0455413	0.282456	0	0	High	Very Low	Very Low	Very Low	Very Low	Very Low	Very Low	Very Low	Low	Very Low	Very Low	High	1.67508	0	0	0	0	0	0	0.0477143	0.393643	0	0	Very High	Very Low	Very Low	Very Low	Very Low	Very Low	Very Low	Very Low	Low	Very Low	Very Low	Very High	Very High	0
101652	GB109053021750	1	0	0	0	0	0	0	1	1	0	0	Very High	Very Low	Very Low	Very Low	Very Low	Very Low	Very Low	Very High	Very High	Very Low	Very Low	Very High	3.37062	0	0	0	0	0	0	0.0633269	0.522447	0	0	Very High	Very Low	Very Low	Very Low	Very Low	Very Low	Very Low	Very Low	Moderate	Very Low	Very Low	Very High	Very High	0
101652	GB109053021770	0.769539	0	0	0	0	0	0	0.0592847	0.341469	0	0	High	Very Low	Very Low	Very Low	Very Low	Very Low	Very Low	Very Low	Low	Very Low	Very Low	High	3.37062	0	0	0	0	0	0	0.0633269	0.522447	0	0	Very High	Very Low	Very Low	Very Low	Very Low	Very Low	Very Low	Very Low	Moderate	Very Low	Very Low	Very High	Very High	0
101668	GB109053022210	0.088108	0	0	0	0	0	0	0.00893737	0.077953	0	0	Very Low	Very Low	Very Low	Very Low	Very Low	Very Low	Very Low	Very Low	Very Low	Very Low	Very Low	Very Low	0.0966211	0	0	0	0	0	0	0.00901796	0.0845434	0	0	Very Low	Very Low	Very Low	Very Low	Very Low	Very Low	Very Low	Very Low	Very Low	Very Low	Very Low	Very Low	Very Low	0
101834	GB109054026650	0.111922	0	0	0	0	0	0	0.0329761	0.108529	0	0	Very Low	Very Low	Very Low	Very Low	Very Low	Very Low	Very Low	Very Low	Very Low	Very Low	Very Low	Very Low	2.42491	0	0	0	0	0	0	0.226325	2.1218	0	0	Very High	Very Low	Very Low	Very Low	Very Low	Very Low	Very Low	Low	Very High	Very Low	Very Low	Very High	Very High	0
101879	GB108052015682	0.357241	0	0	0	0	0	0	0.044175	0.246893	1	0	Low	Very Low	Very Low	Very Low	Very Low	Very Low	Very Low	Very Low	Low	Very High	Very Low	Very High	0.617843	0	0	0	0	0	0	0.0576653	0.540613	0.0441316	0	High	Very Low	Very Low	Very Low	Very Low	Very Low	Very Low	Very Low	Moderate	Very Low	Very Low	High	Very High	0
101886	GB109053021890	0.937739	0	0	0	0	0	0	0.47116	0.825093	1	0	Very High	Very Low	Very Low	Very Low	Very Low	Very Low	Very Low	Moderate	Very High	Very High	Very Low	Very High	6.87582	0	0	0	0	0	0	0.129182	1.06575	0.484433	0	Very High	Very Low	Very Low	Very Low	Very Low	Very Low	Very Low	Very Low	Very High	Moderate	Very Low	Very High	Very High	0
101886	GB109053021920	1	0	0	0	0	0	0	1	1	1	0	Very High	Very Low	Very Low	Very Low	Very Low	Very Low	Very Low	Very High	Very High	Very High	Very Low	Very High	6.87582	0	0	0	0	0	0	0.129182	1.06575	0.484433	0	Very High	Very Low	Very Low	Very Low	Very Low	Very Low	Very Low	Very Low	Very High	Moderate	Very Low	Very High	Very High	0
101886	GB109053021930	0.518377	0	0	0	0	0	0	0.0198208	0.142976	0.0704861	0	Moderate	Very Low	Very Low	Very Low	Very Low	Very Low	Very Low	Very Low	Very Low	Very Low	Very Low	Moderate	6.87582	0	0	0	0	0	0	0.129182	1.06575	0.484433	0	Very High	Very Low	Very Low	Very Low	Very Low	Very Low	Very Low	Very Low	Very High	Moderate	Very Low	Very High	Very High	0
101886	GB109053027440	0.14171	0	0	0	0	0	0	0.0347691	0.102788	1	0	Very Low	Very Low	Very Low	Very Low	Very Low	Very Low	Very Low	Very Low	Very Low	Very High	Very Low	Very High	6.87582	0	0	0	0	0	0	0.129182	1.06575	0.484433	0	Very High	Very Low	Very Low	Very Low	Very Low	Very Low	Very Low	Very Low	Very High	Moderate	Very Low	Very High	Very High	0
101940	GB108051020250	0.962983	0	0	0	0	0	0	0	0.942683	0	0	Very High	Very Low	Very Low	Very Low	Very Low	Very Low	Very Low	Very Low	Very High	Very Low	Very Low	Very High	1.64254	0	0	0	0	0	0	0	1.43722	0	0	Very High	Very Low	Very Low	Very Low	Very Low	Very Low	Very Low	Very Low	Very High	Very Low	Very Low	Very High	Very High	0
101940	GB108051020260	1	0	0	0	0	0	0	0	1	0	0	Very High	Very Low	Very Low	Very Low	Very Low	Very Low	Very Low	Very Low	Very High	Very Low	Very Low	Very High	1.64254	0	0	0	0	0	0	0	1.43722	0	0	Very High	Very Low	Very Low	Very Low	Very Low	Very Low	Very Low	Very Low	Very High	Very Low	Very Low	Very High	Very High	0
101940	GB108051020560	1	0	0	0	0	0	0	0	1	0	0	Very High	Very Low	Very Low	Very Low	Very Low	Very Low	Very Low	Very Low	Very High	Very Low	Very Low	Very High	1.64254	0	0	0	0	0	0	0	1.43722	0	0	Very High	Very Low	Very Low	Very Low	Very Low	Very Low	Very Low	Very Low	Very High	Very Low	Very Low	Very High	Very High	0
101940	GB640807670000	0.132268	0	0	0	0	0	0	0	0.231266	0	0	Very Low	Very Low	Very Low	Very Low	Very Low	Very Low	Very Low	Very Low	Low	Very Low	Very Low	Low	1.64254	0	0	0	0	0	0	0	1.43722	0	0	Very High	Very Low	Very Low	Very Low	Very Low	Very Low	Very Low	Very Low	Very High	Very Low	Very Low	Very High	Very High	3
101940	GB670807410000	0.869529	0	0	0	0	0	0	0	0.805722	0	0	Very High	Very Low	Very Low	Very Low	Very Low	Very Low	Very Low	Very Low	Very High	Very Low	Very Low	Very High	1.64254	0	0	0	0	0	0	0	1.43722	0	0	Very High	Very Low	Very Low	Very Low	Very Low	Very Low	Very Low	Very Low	Very High	Very Low	Very Low	Very High	Very High	0
101966	GB108052021183	0	0	0	0	0	0	0	0	0	0	0	Very Low	Very Low	Very Low	Very Low	Very Low	Very Low	Very Low	Very Low	Very Low	Very Low	Very Low	Very Low	NA	NA	NA	NA	NA	NA	NA	NA	NA	NA	NA	NA	NA	NA	NA	NA	NA	NA	NA	NA	NA	NA	NA	Very Low	0
102049	GB108052021390	0.023643	0	0	0	0	0	0	0.0141131	0.0157782	0	0	Very Low	Very Low	Very Low	Very Low	Very Low	Very Low	Very Low	Very Low	Very Low	Very Low	Very Low	Very Low	0.231243	0	0	0	0	0	0	0.0215827	0.202338	0	0	Low	Very Low	Very Low	Very Low	Very Low	Very Low	Very Low	Very Low	Low	Very Low	Very Low	Low	Low	0
102050	GB108052015510	0.234217	0	0	0	0	0	0	0.0416815	0.206194	0	0	Low	Very Low	Very Low	Very Low	Very Low	Very Low	Very Low	Very Low	Low	Very Low	Very Low	Low	2.19314	0	0	0	0	0	0	0.204693	1.91899	0	0	Very High	Very Low	Very Low	Very Low	Very Low	Very Low	Very Low	Low	Very High	Very Low	Very Low	Very High	Very High	0
102107	GB109053021970	1	0	0	0	0	0	0	0	1	0	0	Very High	Very Low	Very Low	Very Low	Very Low	Very Low	Very Low	Very Low	Very High	Very Low	Very Low	Very High	4.32076	0	0	0	0	0	0	0	3.78067	0	0	Very High	Very Low	Very Low	Very Low	Very Low	Very Low	Very Low	Very Low	Very High	Very Low	Very Low	Very High	Very High	0
102107	GB109053021980	1	0	0	0	0	0	0	0	1	0	0	Very High	Very Low	Very Low	Very Low	Very Low	Very Low	Very Low	Very Low	Very High	Very Low	Very Low	Very High	4.32076	0	0	0	0	0	0	0	3.78067	0	0	Very High	Very Low	Very Low	Very Low	Very Low	Very Low	Very Low	Very Low	Very High	Very Low	Very Low	Very High	Very High	0
102107	GB109053027371	0.579943	0	0	0	0	0	0	0	0.741874	0	0	Moderate	Very Low	Very Low	Very Low	Very Low	Very Low	Very Low	Very Low	High	Very Low	Very Low	High	4.32076	0	0	0	0	0	0	0	3.78067	0	0	Very High	Very Low	Very Low	Very Low	Very Low	Very Low	Very Low	Very Low	Very High	Very Low	Very Low	Very High	Very High	0
102107	GB109053027450	1	0	0	0	0	0	0	0	1	0	0	Very High	Very Low	Very Low	Very Low	Very Low	Very Low	Very Low	Very Low	Very High	Very Low	Very Low	Very High	4.32076	0	0	0	0	0	0	0	3.78067	0	0	Very High	Very Low	Very Low	Very Low	Very Low	Very Low	Very Low	Very Low	Very High	Very Low	Very Low	Very High	Very High	0
102107	GB109053027510	0.978087	0	0	0	0	0	0	0	0.95217	0	0	Very High	Very Low	Very Low	Very Low	Very Low	Very Low	Very Low	Very Low	Very High	Very Low	Very Low	Very High	4.32076	0	0	0	0	0	0	0	3.78067	0	0	Very High	Very Low	Very Low	Very Low	Very Low	Very Low	Very Low	Very Low	Very High	Very Low	Very Low	Very High	Very High	0
102107	GB109053027530	1	0	0	0	0	0	0	0	1	0	0	Very High	Very Low	Very Low	Very Low	Very Low	Very Low	Very Low	Very Low	Very High	Very Low	Very Low	Very High	4.32076	0	0	0	0	0	0	0	3.78067	0	0	Very High	Very Low	Very Low	Very Low	Very Low	Very Low	Very Low	Very Low	Very High	Very Low	Very Low	Very High	Very High	0
102107	GB109053027540	1	0	0	0	0	0	0	0	1	0	0	Very High	Very Low	Very Low	Very Low	Very Low	Very Low	Very Low	Very Low	Very High	Very Low	Very Low	Very High	4.32076	0	0	0	0	0	0	0	3.78067	0	0	Very High	Very Low	Very Low	Very Low	Very Low	Very Low	Very Low	Very Low	Very High	Very Low	Very Low	Very High	Very High	0
102107	GB109053027560	1	0	0	0	0	0	0	0	1	0	0	Very High	Very Low	Very Low	Very Low	Very Low	Very Low	Very Low	Very Low	Very High	Very Low	Very Low	Very High	4.32076	0	0	0	0	0	0	0	3.78067	0	0	Very High	Very Low	Very Low	Very Low	Very Low	Very Low	Very Low	Very Low	Very High	Very Low	Very Low	Very High	Very High	0
102107	GB109053027570	0	0	0	0	0	0	0	0	0	0	0	Very Low	Very Low	Very Low	Very Low	Very Low	Very Low	Very Low	Very Low	Very Low	Very Low	Very Low	Very Low	4.32076	0	0	0	0	0	0	0	3.78067	0	0	Very High	Very Low	Very Low	Very Low	Very Low	Very Low	Very Low	Very Low	Very High	Very Low	Very Low	Very High	Very High	0
102107	GB109053027590	0	0	0	0	0	0	0	0	0	0	0	Very Low	Very Low	Very Low	Very Low	Very Low	Very Low	Very Low	Very Low	Very Low	Very Low	Very Low	Very Low	4.32076	0	0	0	0	0	0	0	3.78067	0	0	Very High	Very Low	Very Low	Very Low	Very Low	Very Low	Very Low	Very Low	Very High	Very Low	Very Low	Very High	Very High	0
102107	GB109053027820	1	0	0	0	0	0	0	0	1	0	0	Very High	Very Low	Very Low	Very Low	Very Low	Very Low	Very Low	Very Low	Very High	Very Low	Very Low	Very High	4.32076	0	0	0	0	0	0	0	3.78067	0	0	Very High	Very Low	Very Low	Very Low	Very Low	Very Low	Very Low	Very Low	Very High	Very Low	Very Low	Very High	Very High	0
102107	GB109053027840	1	0	0	0	0	0	0	0	1	0	0	Very High	Very Low	Very Low	Very Low	Very Low	Very Low	Very Low	Very Low	Very High	Very Low	Very Low	Very High	4.32076	0	0	0	0	0	0	0	3.78067	0	0	Very High	Very Low	Very Low	Very Low	Very Low	Very Low	Very Low	Very Low	Very High	Very Low	Very Low	Very High	Very High	0
102107	GB109054026650	0.582465	0	0	0	0	0	0	0	0.423603	0	0	Moderate	Very Low	Very Low	Very Low	Very Low	Very Low	Very Low	Very Low	Moderate	Very Low	Very Low	Moderate	4.32076	0	0	0	0	0	0	0	3.78067	0	0	Very High	Very Low	Very Low	Very Low	Very Low	Very Low	Very Low	Very Low	Very High	Very Low	Very Low	Very High	Very High	0
102107	GB530905415405	0.585086	0	0	0	0	0	0	0	0.556056	0	0	Moderate	Very Low	Very Low	Very Low	Very Low	Very Low	Very Low	Very Low	Moderate	Very Low	Very Low	Moderate	4.32076	0	0	0	0	0	0	0	3.78067	0	0	Very High	Very Low	Very Low	Very Low	Very Low	Very Low	Very Low	Very Low	Very High	Very Low	Very Low	Very High	Very High	0
102107	GB70910601	1	0	0	0	0	0	0	0	1	0	0	Very High	Very Low	Very Low	Very Low	Very Low	Very Low	Very Low	Very Low	Very High	Very Low	Very Low	Very High	4.32076	0	0	0	0	0	0	0	3.78067	0	0	Very High	Very Low	Very Low	Very Low	Very Low	Very Low	Very Low	Very Low	Very High	Very Low	Very Low	Very High	Very High	0
102152	GB108052021160	0.231855	0	0	0	0	0	0	0.0322082	0.221358	0.0294278	0	Low	Very Low	Very Low	Very Low	Very Low	Very Low	Very Low	Very Low	Low	Very Low	Very Low	Low	0.424481	0	0	0	0	0	0	0.0396182	0.371421	0.0303201	0	Moderate	Very Low	Very Low	Very Low	Very Low	Very Low	Very Low	Very Low	Low	Very Low	Very Low	Moderate	Moderate	0
102153	GB109053021750	0	0	0	0	0	0	0	0	0	0	0	Very Low	Very Low	Very Low	Very Low	Very Low	Very Low	Very Low	Very Low	Very Low	Very Low	Very Low	Very Low	6.19465	0	0	0	0	0	0	0.116384	0.960171	0	0	Very High	Very Low	Very Low	Very Low	Very Low	Very Low	Very Low	Very Low	Very High	Very Low	Very Low	Very High	Very High	0
102153	GB109053021791	0.46765	0	0	0	0	0	0	0.0162365	0.119844	0	0	Moderate	Very Low	Very Low	Very Low	Very Low	Very Low	Very Low	Very Low	Very Low	Very Low	Very Low	Moderate	6.19465	0	0	0	0	0	0	0.116384	0.960171	0	0	Very High	Very Low	Very Low	Very Low	Very Low	Very Low	Very Low	Very Low	Very High	Very Low	Very Low	Very High	Very High	0
102153	GB109053021800	1	0	0	0	0	0	0	1	1	0	0	Very High	Very Low	Very Low	Very Low	Very Low	Very Low	Very Low	Very High	Very High	Very Low	Very Low	Very High	6.19465	0	0	0	0	0	0	0.116384	0.960171	0	0	Very High	Very Low	Very Low	Very Low	Very Low	Very Low	Very Low	Very Low	Very High	Very Low	Very Low	Very High	Very High	0
102153	GB109053021830	1	0	0	0	0	0	0	1	1	0	0	Very High	Very Low	Very Low	Very Low	Very Low	Very Low	Very Low	Very High	Very High	Very Low	Very Low	Very High	6.19465	0	0	0	0	0	0	0.116384	0.960171	0	0	Very High	Very Low	Very Low	Very Low	Very Low	Very Low	Very Low	Very Low	Very High	Very Low	Very Low	Very High	Very High	0
102153	GB109053027372	0.810417	0	0	0	0	0	0	0.0551	0.436821	0	0	Very High	Very Low	Very Low	Very Low	Very Low	Very Low	Very Low	Very Low	Moderate	Very Low	Very Low	Very High	6.19465	0	0	0	0	0	0	0.116384	0.960171	0	0	Very High	Very Low	Very Low	Very Low	Very Low	Very Low	Very Low	Very Low	Very High	Very Low	Very Low	Very High	Very High	0
102162	GB108052021320	0.313756	0	0	0	0	0	0	0.0409263	0.285743	0	0	Low	Very Low	Very Low	Very Low	Very Low	Very Low	Very Low	Very Low	Low	Very Low	Very Low	Low	0.457208	0	0	0	0	0	0	0.0426727	0.400057	0	0	Moderate	Very Low	Very Low	Very Low	Very Low	Very Low	Very Low	Very Low	Moderate	Very Low	Very Low	Moderate	Moderate	0
102172	GB109053022190	0.111742	0	0	0	0	0	0	0.00432084	0.0470387	0	0	Very Low	Very Low	Very Low	Very Low	Very Low	Very Low	Very Low	Very Low	Very Low	Very Low	Very Low	Very Low	0.748529	0	0	0	0	0	0	0.0140633	0.116022	0	0	High	Very Low	Very Low	Very Low	Very Low	Very Low	Very Low	Very Low	Very Low	Very Low	Very Low	High	High	0
102172	GB109053022220	0.0019238	0	0	0	0	0	0	8.72e-05	0.000947648	0	0	Very Low	Very Low	Very Low	Very Low	Very Low	Very Low	Very Low	Very Low	Very Low	Very Low	Very Low	Very Low	0.748529	0	0	0	0	0	0	0.0140633	0.116022	0	0	High	Very Low	Very Low	Very Low	Very Low	Very Low	Very Low	Very Low	Very Low	Very Low	Very Low	High	High	0
102190	GB109053027372	0.0917256	0	0	0	0	0	0	0.0168383	0.0728129	0	0	Very Low	Very Low	Very Low	Very Low	Very Low	Very Low	Very Low	Very Low	Very Low	Very Low	Very Low	Very Low	1.44958	0	0	0	0	0	0	0.0272345	0.224684	0	0	Very High	Very Low	Very Low	Very Low	Very Low	Very Low	Very Low	Very Low	Low	Very Low	Very Low	Very High	Very High	0
102195	GB108052015630	0.207327	0	0	0	0	0	0	0.0119778	0.0831609	0	0	Low	Very Low	Very Low	Very Low	Very Low	Very Low	Very Low	Very Low	Very Low	Very Low	Very Low	Low	1.76533	0	0	0	0	0	0	0.0502852	0.414853	0	0	Very High	Very Low	Very Low	Very Low	Very Low	Very Low	Very Low	Very Low	Moderate	Very Low	Very Low	Very High	Very High	0
102218	GB109053022251	0.0344092	0	0	0	0	0	0	0.0258342	0.09465	0.0215727	0	Very Low	Very Low	Very Low	Very Low	Very Low	Very Low	Very Low	Very Low	Very Low	Very Low	Very Low	Very Low	0.308677	0	0	0	0	0	0	0.0288099	0.270093	0.0220484	0	Low	Very Low	Very Low	Very Low	Very Low	Very Low	Very Low	Very Low	Low	Very Low	Very Low	Low	Low	0
102219	GB109053021990	0.320399	0	0	0	0	0	0	0.0421476	0.292046	0	0	Low	Very Low	Very Low	Very Low	Very Low	Very Low	Very Low	Very Low	Low	Very Low	Very Low	Low	0.471452	0	0	0	0	0	0	0.0440022	0.412521	0	0	Moderate	Very Low	Very Low	Very Low	Very Low	Very Low	Very Low	Very Low	Moderate	Very Low	Very Low	Moderate	Moderate	0
102222	GB109053022000	0	0	0	0	0	0	0	0	0	0	0	Very Low	Very Low	Very Low	Very Low	Very Low	Very Low	Very Low	Very Low	Very Low	Very Low	Very Low	Very Low	0.962699	0	0	0	0	0	0	0.0180871	0.149218	0	0	Very High	Very Low	Very Low	Very Low	Very Low	Very Low	Very Low	Very Low	Very Low	Very Low	Very Low	Very High	Very High	0
102222	GB109053022101	0.488993	0	0	0	0	0	0	0.017661	0.129165	0	0	Moderate	Very Low	Very Low	Very Low	Very Low	Very Low	Very Low	Very Low	Very Low	Very Low	Very Low	Moderate	0.962699	0	0	0	0	0	0	0.0180871	0.149218	0	0	Very High	Very Low	Very Low	Very Low	Very Low	Very Low	Very Low	Very Low	Very Low	Very Low	Very Low	Very High	Very High	0
102222	GB109053022110	0.691354	0	0	0	0	0	0	0.0276221	0.2941	0	0	High	Very Low	Very Low	Very Low	Very Low	Very Low	Very Low	Very Low	Low	Very Low	Very Low	High	0.962699	0	0	0	0	0	0	0.0180871	0.149218	0	0	Very High	Very Low	Very Low	Very Low	Very Low	Very Low	Very Low	Very Low	Very Low	Very Low	Very Low	Very High	Very High	0
102257	GB108052015400	0	0	0	0	0	0	0	0	0	0	0	Very Low	Very Low	Very Low	Very Low	Very Low	Very Low	Very Low	Very Low	Very Low	Very Low	Very Low	Very Low	1.69747	0	0	0	0	0	0	0.158431	1.48529	0.121248	0	Very High	Very Low	Very Low	Very Low	Very Low	Very Low	Very Low	Very Low	Very High	Very Low	Very Low	Very High	Very High	0
102257	GB108052015410	1	0	0	0	0	0	0	1	1	1	0	Very High	Very Low	Very Low	Very Low	Very Low	Very Low	Very Low	Very High	Very High	Very High	Very Low	Very High	1.69747	0	0	0	0	0	0	0.158431	1.48529	0.121248	0	Very High	Very Low	Very Low	Very Low	Very Low	Very Low	Very Low	Very Low	Very High	Very Low	Very Low	Very High	Very High	0
102257	GB108052015420	1	0	0	0	0	0	0	1	1	1	0	Very High	Very Low	Very Low	Very Low	Very Low	Very Low	Very Low	Very High	Very High	Very High	Very Low	Very High	1.69747	0	0	0	0	0	0	0.158431	1.48529	0.121248	0	Very High	Very Low	Very Low	Very Low	Very Low	Very Low	Very Low	Very Low	Very High	Very Low	Very Low	Very High	Very High	0
102257	GB108052015460	1	0	0	0	0	0	0	1	1	1	0	Very High	Very Low	Very Low	Very Low	Very Low	Very Low	Very Low	Very High	Very High	Very High	Very Low	Very High	1.69747	0	0	0	0	0	0	0.158431	1.48529	0.121248	0	Very High	Very Low	Very Low	Very Low	Very Low	Very Low	Very Low	Very Low	Very High	Very Low	Very Low	Very High	Very High	0
102257	GB108052015481	0.0595694	0	0	0	0	0	0	0.00425863	0.0667556	1	0	Very Low	Very Low	Very Low	Very Low	Very Low	Very Low	Very Low	Very Low	Very Low	Very High	Very Low	Very High	1.69747	0	0	0	0	0	0	0.158431	1.48529	0.121248	0	Very High	Very Low	Very Low	Very Low	Very Low	Very Low	Very Low	Very Low	Very High	Very Low	Very Low	Very High	Very High	0
102257	GB108052015482	0.386547	0	0	0	0	0	0	0.0555444	0.355401	0.0430699	0	Low	Very Low	Very Low	Very Low	Very Low	Very Low	Very Low	Very Low	Low	Very Low	Very Low	Low	1.69747	0	0	0	0	0	0	0.158431	1.48529	0.121248	0	Very High	Very Low	Very Low	Very Low	Very Low	Very Low	Very Low	Very Low	Very High	Very Low	Very Low	Very High	Very High	0
102257	GB108052015490	1	0	0	0	0	0	0	1	1	1	0	Very High	Very Low	Very Low	Very Low	Very Low	Very Low	Very Low	Very High	Very High	Very High	Very Low	Very High	1.69747	0	0	0	0	0	0	0.158431	1.48529	0.121248	0	Very High	Very Low	Very Low	Very Low	Very Low	Very Low	Very Low	Very Low	Very High	Very Low	Very Low	Very High	Very High	0
102257	GB108052021390	0.866481	0	0	0	0	0	0	0.301714	0.899493	1	0	Very High	Very Low	Very Low	Very Low	Very Low	Very Low	Very Low	Low	Very High	Very High	Very Low	Very High	1.69747	0	0	0	0	0	0	0.158431	1.48529	0.121248	0	Very High	Very Low	Very Low	Very Low	Very Low	Very Low	Very Low	Very Low	Very High	Very Low	Very Low	Very High	Very High	0
102272	GB109053022271	0.146791	0	0	0	0	0	0	0.0221818	0.0631313	0	0	Very Low	Very Low	Very Low	Very Low	Very Low	Very Low	Very Low	Very Low	Very Low	Very Low	Very Low	Very Low	8.06296	0	0	0	0	0	0	0.151486	1.24976	0	0	Very High	Very Low	Very Low	Very Low	Very Low	Very Low	Very Low	Very Low	Very High	Very Low	Very Low	Very High	Very High	0
102272	GB109053022300	1	0	0	0	0	0	0	1	1	0	0	Very High	Very Low	Very Low	Very Low	Very Low	Very Low	Very Low	Very High	Very High	Very Low	Very Low	Very High	8.06296	0	0	0	0	0	0	0.151486	1.24976	0	0	Very High	Very Low	Very Low	Very Low	Very Low	Very Low	Very Low	Very Low	Very High	Very Low	Very Low	Very High	Very High	0
102272	GB109053027371	0.331657	0	0	0	0	0	0	0.103789	0.120248	0	0	Low	Very Low	Very Low	Very Low	Very Low	Very Low	Very Low	Very Low	Very Low	Very Low	Very Low	Low	8.06296	0	0	0	0	0	0	0.151486	1.24976	0	0	Very High	Very Low	Very Low	Very Low	Very Low	Very Low	Very Low	Very Low	Very High	Very Low	Very Low	Very High	Very High	0
102272	GB109053027810	1	0	0	0	0	0	0	1	1	0	0	Very High	Very Low	Very Low	Very Low	Very Low	Very Low	Very Low	Very High	Very High	Very Low	Very Low	Very High	8.06296	0	0	0	0	0	0	0.151486	1.24976	0	0	Very High	Very Low	Very Low	Very Low	Very Low	Very Low	Very Low	Very Low	Very High	Very Low	Very Low	Very High	Very High	0
102289	GB108052015290	0.431091	0	0	0	0	0	0	0.0676129	0.397557	0	0	Moderate	Very Low	Very Low	Very Low	Very Low	Very Low	Very Low	Very Low	Low	Very Low	Very Low	Moderate	0.77989	0	0	0	0	0	0	0.0727897	0.682404	0	0	High	Very Low	Very Low	Very Low	Very Low	Very Low	Very Low	Very Low	High	Very Low	Very Low	High	High	0
102328	GB109053027410	1	0	0	0	0	0	0	1	1	0	0	Very High	Very Low	Very Low	Very Low	Very Low	Very Low	Very Low	Very High	Very High	Very Low	Very Low	Very High	5.39919	0	0	0	0	0	0	0.101439	0.836875	0	0	Very High	Very Low	Very Low	Very Low	Very Low	Very Low	Very Low	Very Low	Very High	Very Low	Very Low	Very High	Very High	0
102328	GB109053027440	0.110166	0	0	0	0	0	0	0.00819078	0.0684925	0	0	Very Low	Very Low	Very Low	Very Low	Very Low	Very Low	Very Low	Very Low	Very Low	Very Low	Very Low	Very Low	5.39919	0	0	0	0	0	0	0.101439	0.836875	0	0	Very High	Very Low	Very Low	Very Low	Very Low	Very Low	Very Low	Very Low	Very High	Very Low	Very Low	Very High	Very High	0
102350	GB540805210900	0.0891081	0	0	0	0	0	0	0.027917	0.100978	0	0	Very Low	Very Low	Very Low	Very Low	Very Low	Very Low	Very Low	Very Low	Very Low	Very Low	Very Low	Very Low	1.83301	0	0	0	0	0	0	0.171081	1.60389	0	0	Very High	Very Low	Very Low	Very Low	Very Low	Very Low	Very Low	Very Low	Very High	Very Low	Very Low	Very High	Very High	3
102361	GB106039023620	1	0	0	0	0	0	0	1	1	0	0	Very High	Very Low	Very Low	Very Low	Very Low	Very Low	Very Low	Very High	Very High	Very Low	Very Low	Very High	2.1747	0	0	0	0	0	0	0.202972	1.90286	0	0	Very High	Very Low	Very Low	Very Low	Very Low	Very Low	Very Low	Low	Very High	Very Low	Very Low	Very High	Very High	0
102361	GB106039023700	1	0	0	0	0	0	0	1	1	0	0	Very High	Very Low	Very Low	Very Low	Very Low	Very Low	Very Low	Very High	Very High	Very Low	Very Low	Very High	2.1747	0	0	0	0	0	0	0.202972	1.90286	0	0	Very High	Very Low	Very Low	Very Low	Very Low	Very Low	Very Low	Low	Very High	Very Low	Very Low	Very High	Very High	0
102361	GB109053027650	0.178412	0	0	0	0	0	0	0.0323156	0.202147	0	0	Very Low	Very Low	Very Low	Very Low	Very Low	Very Low	Very Low	Very Low	Low	Very Low	Very Low	Low	2.1747	0	0	0	0	0	0	0.202972	1.90286	0	0	Very High	Very Low	Very Low	Very Low	Very Low	Very Low	Very Low	Low	Very High	Very Low	Very Low	Very High	Very High	0
102361	GB109053027690	0.212298	0	0	0	0	0	0	0.0210519	0.216877	0	0	Low	Very Low	Very Low	Very Low	Very Low	Very Low	Very Low	Very Low	Low	Very Low	Very Low	Low	2.1747	0	0	0	0	0	0	0.202972	1.90286	0	0	Very High	Very Low	Very Low	Very Low	Very Low	Very Low	Very Low	Low	Very High	Very Low	Very Low	Very High	Very High	0
102361	GB109053027730	0.363121	0	0	0	0	0	0	0.202892	0.406424	0	0	Low	Very Low	Very Low	Very Low	Very Low	Very Low	Very Low	Low	Moderate	Very Low	Very Low	Moderate	2.1747	0	0	0	0	0	0	0.202972	1.90286	0	0	Very High	Very Low	Very Low	Very Low	Very Low	Very Low	Very Low	Low	Very High	Very Low	Very Low	Very High	Very High	0
102361	GB109053027760	0.999126	0	0	0	0	0	0	0.998544	0.999213	0	0	Very High	Very Low	Very Low	Very Low	Very Low	Very Low	Very Low	Very High	Very High	Very Low	Very Low	Very High	2.1747	0	0	0	0	0	0	0.202972	1.90286	0	0	Very High	Very Low	Very Low	Very Low	Very Low	Very Low	Very Low	Low	Very High	Very Low	Very Low	Very High	Very High	0
102361	GB109053027770	0.305998	0	0	0	0	0	0	0.0395258	0.278397	0	0	Low	Very Low	Very Low	Very Low	Very Low	Very Low	Very Low	Very Low	Low	Very Low	Very Low	Low	2.1747	0	0	0	0	0	0	0.202972	1.90286	0	0	Very High	Very Low	Very Low	Very Low	Very Low	Very Low	Very Low	Low	Very High	Very Low	Very Low	Very High	Very High	0
102361	GB109053027780	1	0	0	0	0	0	0	1	1	0	0	Very High	Very Low	Very Low	Very Low	Very Low	Very Low	Very Low	Very High	Very High	Very Low	Very Low	Very High	2.1747	0	0	0	0	0	0	0.202972	1.90286	0	0	Very High	Very Low	Very Low	Very Low	Very Low	Very Low	Very Low	Low	Very High	Very Low	Very Low	Very High	Very High	0
102362	GB109053021950	0.885796	0	0	0	0	0	0	0.157619	0.52246	0	0	Very High	Very Low	Very Low	Very Low	Very Low	Very Low	Very Low	Very Low	Moderate	Very Low	Very Low	Very High	5.00073	0	0	0	0	0	0	0.0939532	0.775114	0	0	Very High	Very Low	Very Low	Very Low	Very Low	Very Low	Very Low	Very Low	High	Very Low	Very Low	Very High	Very High	0
102362	GB109053027371	0.033807	0	0	0	0	0	0	0.00901665	0.0114912	0	0	Very Low	Very Low	Very Low	Very Low	Very Low	Very Low	Very Low	Very Low	Very Low	Very Low	Very Low	Very Low	5.00073	0	0	0	0	0	0	0.0939532	0.775114	0	0	Very High	Very Low	Very Low	Very Low	Very Low	Very Low	Very Low	Very Low	High	Very Low	Very Low	Very High	Very High	0
102389	GB108052015270	0.625716	0	0	0	0	0	0	0.134972	0.593957	0	0	High	Very Low	Very Low	Very Low	Very Low	Very Low	Very Low	Very Low	Moderate	Very Low	Very Low	High	1.67176	0	0	0	0	0	0	0.156031	1.46279	0	0	Very High	Very Low	Very Low	Very Low	Very Low	Very Low	Very Low	Very Low	Very High	Very Low	Very Low	Very High	Very High	0
102390	GB108052015190	0.00418414	0	0	0	0	0	0	0.000707714	0.0028181	0	0	Very Low	Very Low	Very Low	Very Low	Very Low	Very Low	Very Low	Very Low	Very Low	Very Low	Very Low	Very Low	0.129924	0	0	0	0	0	0	0.0121262	0.113683	0	0	Very Low	Very Low	Very Low	Very Low	Very Low	Very Low	Very Low	Very Low	Very Low	Very Low	Very Low	Very Low	Very Low	0
102395	GB108052015190	0.490149	0	0	0	0	0	0	0.0829048	0.462175	0	0	Moderate	Very Low	Very Low	Very Low	Very Low	Very Low	Very Low	Very Low	Moderate	Very Low	Very Low	Moderate	1.03524	0	0	0	0	0	0	0.0966228	0.905839	0	0	Very High	Very Low	Very Low	Very Low	Very Low	Very Low	Very Low	Very Low	Very High	Very Low	Very Low	Very High	Very High	0
102408	GB108052021160	0.101365	0	0	0	0	0	0	0.0112649	0.0774209	0	0	Very Low	Very Low	Very Low	Very Low	Very Low	Very Low	Very Low	Very Low	Very Low	Very Low	Very Low	Very Low	0.840717	0	0	0	0	0	0	0.0784669	0.735627	0	0	Very High	Very Low	Very Low	Very Low	Very Low	Very Low	Very Low	Very Low	High	Very Low	Very Low	Very High	Very High	0
102409	GB108052021140	0.103797	0	0	0	0	0	0	0.0107955	0.0922435	0.00828284	0	Very Low	Very Low	Very Low	Very Low	Very Low	Very Low	Very Low	Very Low	Very Low	Very Low	Very Low	Very Low	0.116928	0	0	0	0	0	0	0.0109133	0.102312	0.00835202	0	Very Low	Very Low	Very Low	Very Low	Very Low	Very Low	Very Low	Very Low	Very Low	Very Low	Very Low	Very Low	Very Low	0
102410	GB108052015670	0	0	0	0	0	0	0	0	0	0	0	Very Low	Very Low	Very Low	Very Low	Very Low	Very Low	Very Low	Very Low	Very Low	Very Low	Very Low	Very Low	1.50214	0	0	0	0	0	0	0.1402	1.31438	0	0	Very High	Very Low	Very Low	Very Low	Very Low	Very Low	Very Low	Very Low	Very High	Very Low	Very Low	Very High	Very High	0
102410	GB108052015690	0.600343	0	0	0	0	0	0	0.122961	0.567918	0	0	High	Very Low	Very Low	Very Low	Very Low	Very Low	Very Low	Very Low	Moderate	Very Low	Very Low	High	1.50214	0	0	0	0	0	0	0.1402	1.31438	0	0	Very High	Very Low	Very Low	Very Low	Very Low	Very Low	Very Low	Very Low	Very High	Very Low	Very Low	Very High	Very High	0
102442	GB109054026670	0.535949	0	0	0	0	0	0	0.097305	0.502628	0	0	Moderate	Very Low	Very Low	Very Low	Very Low	Very Low	Very Low	Very Low	Moderate	Very Low	Very Low	Moderate	1.15493	0	0	0	0	0	0	0.107794	1.01057	0	0	Very High	Very Low	Very Low	Very Low	Very Low	Very Low	Very Low	Very Low	Very High	Very Low	Very Low	Very High	Very High	0
102443	GB530905415402	0.00588698	0	0	0	0	0	0	0.0161311	0.00717466	0	0	Very Low	Very Low	Very Low	Very Low	Very Low	Very Low	Very Low	Very Low	Very Low	Very Low	Very Low	Very Low	0.599427	0	0	0	0	0	0	0.0559465	0.524499	0	0	Moderate	Very Low	Very Low	Very Low	Very Low	Very Low	Very Low	Very Low	Moderate	Very Low	Very Low	Moderate	Moderate	0
102486	GB109052021640	0.0326768	0	0	0	0	0	0	0.062697	0.0954902	0	0	Very Low	Very Low	Very Low	Very Low	Very Low	Very Low	Very Low	Very Low	Very Low	Very Low	Very Low	Very Low	1.17856	0	0	0	0	0	0	0.109999	1.03124	0	0	Very High	Very Low	Very Low	Very Low	Very Low	Very Low	Very Low	Very Low	Very High	Very Low	Very Low	Very High	Very High	0
102510	GB108052015310	0.143519	0	0	0	0	0	0	0.0317434	0.129154	0	0	Very Low	Very Low	Very Low	Very Low	Very Low	Very Low	Very Low	Very Low	Very Low	Very Low	Very Low	Very Low	0.512795	0	0	0	0	0	0	0.0478609	0.448696	0	0	Moderate	Very Low	Very Low	Very Low	Very Low	Very Low	Very Low	Very Low	Moderate	Very Low	Very Low	Moderate	Moderate	0
102511	GB108052015310	0.119251	0	0	0	0	0	0	0.0175838	0.143086	0	0	Very Low	Very Low	Very Low	Very Low	Very Low	Very Low	Very Low	Very Low	Very Low	Very Low	Very Low	Very Low	0.962165	0	0	0	0	0	0	0.0898021	0.841895	0	0	Very High	Very Low	Very Low	Very Low	Very Low	Very Low	Very Low	Very Low	Very High	Very Low	Very Low	Very High	Very High	0
102511	GB108052015340	0.382629	0	0	0	0	0	0	0.0546822	0.351618	0	0	Low	Very Low	Very Low	Very Low	Very Low	Very Low	Very Low	Very Low	Low	Very Low	Very Low	Low	0.962165	0	0	0	0	0	0	0.0898021	0.841895	0	0	Very High	Very Low	Very Low	Very Low	Very Low	Very Low	Very Low	Very Low	Very High	Very Low	Very Low	Very High	Very High	0
102511	GB108052015360	0.603878	0	0	0	0	0	0	0.575388	0.709232	0	0	High	Very Low	Very Low	Very Low	Very Low	Very Low	Very Low	Moderate	High	Very Low	Very Low	High	0.962165	0	0	0	0	0	0	0.0898021	0.841895	0	0	Very High	Very Low	Very Low	Very Low	Very Low	Very Low	Very Low	Very Low	Very High	Very Low	Very Low	Very High	Very High	0
102523	GB108052015620	0.0284805	0	0	0	0	0	0	0.00243917	0.0114823	0	0	Very Low	Very Low	Very Low	Very Low	Very Low	Very Low	Very Low	Very Low	Very Low	Very Low	Very Low	Very Low	0.312651	0	0	0	0	0	0	0.0291807	0.273569	0	0	Low	Very Low	Very Low	Very Low	Very Low	Very Low	Very Low	Very Low	Low	Very Low	Very Low	Low	Low	0
102536	GB109054026600	0.0826487	0	0	0	0	0	0	0.00833874	0.0730726	0	0	Very Low	Very Low	Very Low	Very Low	Very Low	Very Low	Very Low	Very Low	Very Low	Very Low	Very Low	Very Low	0.090095	0	0	0	0	0	0	0.00840886	0.0788331	0	0	Very Low	Very Low	Very Low	Very Low	Very Low	Very Low	Very Low	Very Low	Very Low	Very Low	Very Low	Very Low	Very Low	0
102629	GB109053022170	0.91351	0	0	0	0	0	0	0.664923	0.69053	0	0	Very High	Very Low	Very Low	Very Low	Very Low	Very Low	Very Low	High	High	Very Low	Very Low	Very High	2.59679	0	0	0	0	0	0	0.0487883	0.402503	0	0	Very High	Very Low	Very Low	Very Low	Very Low	Very Low	Very Low	Very Low	Moderate	Very Low	Very Low	Very High	Very High	0
102629	GB109053022190	0.486507	0	0	0	0	0	0	0.0240798	0.12561	0	0	Moderate	Very Low	Very Low	Very Low	Very Low	Very Low	Very Low	Very Low	Very Low	Very Low	Very Low	Moderate	2.59679	0	0	0	0	0	0	0.0487883	0.402503	0	0	Very High	Very Low	Very Low	Very Low	Very Low	Very Low	Very Low	Very Low	Moderate	Very Low	Very Low	Very High	Very High	0
102629	GB109053022210	0	0	0	0	0	0	0	0	0	0	0	Very Low	Very Low	Very Low	Very Low	Very Low	Very Low	Very Low	Very Low	Very Low	Very Low	Very Low	Very Low	2.59679	0	0	0	0	0	0	0.0487883	0.402503	0	0	Very High	Very Low	Very Low	Very Low	Very Low	Very Low	Very Low	Very Low	Moderate	Very Low	Very Low	Very High	Very High	0
102630	GB109053022230	1	0	0	0	0	0	0	1	1	0	0	Very High	Very Low	Very Low	Very Low	Very Low	Very Low	Very Low	Very High	Very High	Very Low	Very Low	Very High	8.82381	0	0	0	0	0	0	0.165781	1.36769	0	0	Very High	Very Low	Very Low	Very Low	Very Low	Very Low	Very Low	Very Low	Very High	Very Low	Very Low	Very High	Very High	0
102630	GB109053022240	0.668663	0	0	0	0	0	0	0.0157424	0.239573	0	0	High	Very Low	Very Low	Very Low	Very Low	Very Low	Very Low	Very Low	Low	Very Low	Very Low	High	8.82381	0	0	0	0	0	0	0.165781	1.36769	0	0	Very High	Very Low	Very Low	Very Low	Very Low	Very Low	Very Low	Very Low	Very High	Very Low	Very Low	Very High	Very High	0
102630	GB109053022250	1	0	0	0	0	0	0	1	1	0	0	Very High	Very Low	Very Low	Very Low	Very Low	Very Low	Very Low	Very High	Very High	Very Low	Very Low	Very High	8.82381	0	0	0	0	0	0	0.165781	1.36769	0	0	Very High	Very Low	Very Low	Very Low	Very Low	Very Low	Very Low	Very Low	Very High	Very Low	Very Low	Very High	Very High	0
102630	GB109053022251	0.854118	0	0	0	0	0	0	0.0774517	0.554915	0	0	Very High	Very Low	Very Low	Very Low	Very Low	Very Low	Very Low	Very Low	Moderate	Very Low	Very Low	Very High	8.82381	0	0	0	0	0	0	0.165781	1.36769	0	0	Very High	Very Low	Very Low	Very Low	Very Low	Very Low	Very Low	Very Low	Very High	Very Low	Very Low	Very High	Very High	0
102630	GB109053022271	0.692514	0	0	0	0	0	0	0.0713501	0.372292	0	0	High	Very Low	Very Low	Very Low	Very Low	Very Low	Very Low	Very Low	Low	Very Low	Very Low	High	8.82381	0	0	0	0	0	0	0.165781	1.36769	0	0	Very High	Very Low	Very Low	Very Low	Very Low	Very Low	Very Low	Very Low	Very High	Very Low	Very Low	Very High	Very High	0
102712	GB109053022271	0	0	0	0	0	0	0	0	0	0	0	Very Low	Very Low	Very Low	Very Low	Very Low	Very Low	Very Low	Very Low	Very Low	Very Low	Very Low	Very Low	0.330875	0	0	0	0	0	0	0.0308816	0.289515	0	0	Low	Very Low	Very Low	Very Low	Very Low	Very Low	Very Low	Very Low	Low	Very Low	Very Low	Low	Low	0
102712	GB109053022290	0.0667761	0	0	0	0	0	0	0.0152752	0.0525908	0	0	Very Low	Very Low	Very Low	Very Low	Very Low	Very Low	Very Low	Very Low	Very Low	Very Low	Very Low	Very Low	0.330875	0	0	0	0	0	0	0.0308816	0.289515	0	0	Low	Very Low	Very Low	Very Low	Very Low	Very Low	Very Low	Very Low	Low	Very Low	Very Low	Low	Low	0
102713	GB109053027380	0.0133178	0	0	0	0	0	0	0.00181631	0.0109431	0	0	Very Low	Very Low	Very Low	Very Low	Very Low	Very Low	Very Low	Very Low	Very Low	Very Low	Very Low	Very Low	0.0371971	0	0	0	0	0	0	0.00347173	0.0325474	0	0	Very Low	Very Low	Very Low	Very Low	Very Low	Very Low	Very Low	Very Low	Very Low	Very Low	Very Low	Very Low	Very Low	0
102715	GB109053022200	0	0	0	0	0	0	0	0	0	0	0	Very Low	Very Low	Very Low	Very Low	Very Low	Very Low	Very Low	Very Low	Very Low	Very Low	Very Low	Very Low	5.80562	0	0	0	0	0	0	0.109075	0.899871	0.409032	0	Very High	Very Low	Very Low	Very Low	Very Low	Very Low	Very Low	Very Low	Very High	Moderate	Very Low	Very High	Very High	0
102715	GB109053022220	0.251206	0	0	0	0	0	0	0.0205061	0.0742451	0.290293	0	Low	Very Low	Very Low	Very Low	Very Low	Very Low	Very Low	Very Low	Very Low	Low	Very Low	Low	5.80562	0	0	0	0	0	0	0.109075	0.899871	0.409032	0	Very High	Very Low	Very Low	Very Low	Very Low	Very Low	Very Low	Very Low	Very High	Moderate	Very Low	Very High	Very High	0
102716	GB109053021840	0.101558	0	0	0	0	0	0	0.0191343	0.0811797	0	0	Very Low	Very Low	Very Low	Very Low	Very Low	Very Low	Very Low	Very Low	Very Low	Very Low	Very Low	Very Low	0.405001	0	0	0	0	0	0	0.0378001	0.354376	0	0	Moderate	Very Low	Very Low	Very Low	Very Low	Very Low	Very Low	Very Low	Low	Very Low	Very Low	Moderate	Moderate	0
102718	GB109053027372	0.00208687	0	0	0	0	0	0	0.00237888	0.0103908	0	0	Very Low	Very Low	Very Low	Very Low	Very Low	Very Low	Very Low	Very Low	Very Low	Very Low	Very Low	Very Low	0.142955	0	0	0	0	0	0	0.0133425	0.125086	0	0	Very Low	Very Low	Very Low	Very Low	Very Low	Very Low	Very Low	Very Low	Very Low	Very Low	Very Low	Very Low	Very Low	0
102728	GB109053027400	0.289319	0	0	0	0	0	0	0.00564271	0.104778	0	0	Low	Very Low	Very Low	Very Low	Very Low	Very Low	Very Low	Very Low	Very Low	Very Low	Very Low	Low	0.407101	0	0	0	0	0	0	0.00567474	0.117041	0	0	Moderate	Very Low	Very Low	Very Low	Very Low	Very Low	Very Low	Very Low	Very Low	Very Low	Very Low	Moderate	Moderate	0
102735	GB109053022200	0.459814	0	0	0	0	0	0	0.0121903	0.155376	0	0	Moderate	Very Low	Very Low	Very Low	Very Low	Very Low	Very Low	Very Low	Very Low	Very Low	Very Low	Moderate	4.17075	0	0	0	0	0	0	0.0783595	0.646466	0	0	Very High	Very Low	Very Low	Very Low	Very Low	Very Low	Very Low	Very Low	High	Very Low	Very Low	Very High	Very High	0
102735	GB109053027440	0.0443066	0	0	0	0	0	0	0.00621188	0.0327933	0	0	Very Low	Very Low	Very Low	Very Low	Very Low	Very Low	Very Low	Very Low	Very Low	Very Low	Very Low	Very Low	4.17075	0	0	0	0	0	0	0.0783595	0.646466	0	0	Very High	Very Low	Very Low	Very Low	Very Low	Very Low	Very Low	Very Low	High	Very Low	Very Low	Very High	Very High	0
102755	GB109053021890	0.0401402	0	0	0	0	0	0	0.134454	0.0672731	0	0	Very Low	Very Low	Very Low	Very Low	Very Low	Very Low	Very Low	Very Low	Very Low	Very Low	Very Low	Very Low	1.81457	0	0	0	0	0	0	0.34092	0.62502	0	0	Very High	Very Low	Very Low	Very Low	Very Low	Very Low	Very Low	Low	High	Very Low	Very Low	Very High	Very High	0
102815	GB109053027500	0.172523	0	0	0	0	0	0	0.0190878	0.154284	0	0	Very Low	Very Low	Very Low	Very Low	Very Low	Very Low	Very Low	Very Low	Very Low	Very Low	Very Low	Very Low	0.208492	0	0	0	0	0	0	0.0194593	0.182431	0	0	Low	Very Low	Very Low	Very Low	Very Low	Very Low	Very Low	Very Low	Very Low	Very Low	Very Low	Low	Low	0
102816	GB109053027510	0.0023067	0	0	0	0	0	0	0.0299344	0.00505254	0	0	Very Low	Very Low	Very Low	Very Low	Very Low	Very Low	Very Low	Very Low	Very Low	Very Low	Very Low	Very Low	2.15609	0	0	0	0	0	0	0.201236	1.88658	0	0	Very High	Very Low	Very Low	Very Low	Very Low	Very Low	Very Low	Low	Very High	Very Low	Very Low	Very High	Very High	0
102818	GB109053027800	0.93095	0	0	0	0	0	0	0.202107	0.676348	0.487148	0	Very High	Very Low	Very Low	Very Low	Very Low	Very Low	Very Low	Low	High	Moderate	Very Low	Very High	13.4822	0	0	0	0	0	0	0.253301	2.08974	0.94988	0	Very High	Very Low	Very Low	Very Low	Very Low	Very Low	Very Low	Low	Very High	Very High	Very Low	Very High	Very High	0
102840	GB109053027650	0.0242975	0	0	0	0	0	0	0.00488998	0.0220239	0	0	Very Low	Very Low	Very Low	Very Low	Very Low	Very Low	Very Low	Very Low	Very Low	Very Low	Very Low	Very Low	0.658004	0	0	0	0	0	0	0.0614137	0.575753	0	0	High	Very Low	Very Low	Very Low	Very Low	Very Low	Very Low	Very Low	Moderate	Very Low	Very Low	High	High	0
102858	GB109053021880	0.49961	0	0	0	0	0	0	0.0852443	0.466279	0	0	Moderate	Very Low	Very Low	Very Low	Very Low	Very Low	Very Low	Very Low	Moderate	Very Low	Very Low	Moderate	0.998443	0	0	0	0	0	0	0.093188	0.873637	0	0	Very High	Very Low	Very Low	Very Low	Very Low	Very Low	Very Low	Very Low	Very High	Very Low	Very Low	Very High	Very High	0
102917	GB670807410000	0.0653366	0	0	0	0	0	0	0	0.0908131	0	0	Very Low	Very Low	Very Low	Very Low	Very Low	Very Low	Very Low	Very Low	Very Low	Very Low	Very Low	Very Low	1.00311	0	0	0	0	0	0	0	0.877722	0	0	Very High	Very Low	Very Low	Very Low	Very Low	Very Low	Very Low	Very Low	Very High	Very Low	Very Low	Very High	Very High	0
102937	GB109053021852	0.948462	0	0	0	0	0	0	0.256922	0.740426	0	0	Very High	Very Low	Very Low	Very Low	Very Low	Very Low	Very Low	Low	High	Very Low	Very Low	Very High	21.0679	0	0	0	0	0	0	0.395821	3.26552	0	0	Very High	Very Low	Very Low	Very Low	Very Low	Very Low	Very Low	Low	Very High	Very Low	Very Low	Very High	Very High	0
102937	GB109053021900	1	0	0	0	0	0	0	1	1	0	0	Very High	Very Low	Very Low	Very Low	Very Low	Very Low	Very Low	Very High	Very High	Very Low	Very Low	Very High	21.0679	0	0	0	0	0	0	0.395821	3.26552	0	0	Very High	Very Low	Very Low	Very Low	Very Low	Very Low	Very Low	Low	Very High	Very Low	Very Low	Very High	Very High	0
102943	GB109053022040	1	0	0	0	0	0	0	1	1	0	0	Very High	Very Low	Very Low	Very Low	Very Low	Very Low	Very Low	Very High	Very High	Very Low	Very Low	Very High	3.8427	0	0	0	0	0	0	0.358652	3.36236	0	0	Very High	Very Low	Very Low	Very Low	Very Low	Very Low	Very Low	Low	Very High	Very Low	Very Low	Very High	Very High	0
102943	GB109053022050	0.0465044	0	0	0	0	0	0	0.0137294	0.035501	0	0	Very Low	Very Low	Very Low	Very Low	Very Low	Very Low	Very Low	Very Low	Very Low	Very Low	Very Low	Very Low	3.8427	0	0	0	0	0	0	0.358652	3.36236	0	0	Very High	Very Low	Very Low	Very Low	Very Low	Very Low	Very Low	Low	Very High	Very Low	Very Low	Very High	Very High	0
102943	GB109053027600	1	0	0	0	0	0	0	1	1	0	0	Very High	Very Low	Very Low	Very Low	Very Low	Very Low	Very Low	Very High	Very High	Very Low	Very Low	Very High	3.8427	0	0	0	0	0	0	0.358652	3.36236	0	0	Very High	Very Low	Very Low	Very Low	Very Low	Very Low	Very Low	Low	Very High	Very Low	Very Low	Very High	Very High	0
102972	GB108052015241	0.0371808	0	0	0	0	0	0	0	0.0371615	0	0	Very Low	Very Low	Very Low	Very Low	Very Low	Very Low	Very Low	Very Low	Very Low	Very Low	Very Low	Very Low	0.508532	0	0	0	0	0	0	0	0.444966	0	0	Moderate	Very Low	Very Low	Very Low	Very Low	Very Low	Very Low	Very Low	Moderate	Very Low	Very Low	Moderate	Moderate	0
102988	GB109053022290	0.478804	0	0	0	0	0	0	0.0730184	0.478845	0	0	Moderate	Very Low	Very Low	Very Low	Very Low	Very Low	Very Low	Very Low	Moderate	Very Low	Very Low	Moderate	1.95036	0	0	0	0	0	0	0.182034	1.70657	0	0	Very High	Very Low	Very Low	Very Low	Very Low	Very Low	Very Low	Very Low	Very High	Very Low	Very Low	Very High	Very High	0
103010	GB108052021390	0.000381068	0	0	0	0	0	0	0	0.00029669	0	0	Very Low	Very Low	Very Low	Very Low	Very Low	Very Low	Very Low	Very Low	Very Low	Very Low	Very Low	Very Low	0.0950923	0	0	0	0	0	0	0	0.0832057	0	0	Very Low	Very Low	Very Low	Very Low	Very Low	Very Low	Very Low	Very Low	Very Low	Very Low	Very Low	Very Low	Very Low	0
103246	GB109053027665	0	0	0	0	0	0	0	0	0	0	0	Very Low	Very Low	Very Low	Very Low	Very Low	Very Low	Very Low	Very Low	Very Low	Very Low	Very Low	Very Low	NA	NA	NA	NA	NA	NA	NA	NA	NA	NA	NA	NA	NA	NA	NA	NA	NA	NA	NA	NA	NA	NA	NA	Very Low	0
103269	GB109053022260	0.416023	0	0	0	0	0	0	0.062345	0.383989	0	0	Moderate	Very Low	Very Low	Very Low	Very Low	Very Low	Very Low	Very Low	Low	Very Low	Very Low	Moderate	0.712396	0	0	0	0	0	0	0.0664903	0.623346	0	0	High	Very Low	Very Low	Very Low	Very Low	Very Low	Very Low	Very Low	High	Very Low	Very Low	High	High	0
103392	GB108052015140	0.888856	0	0	0	0	0	0	0.131034	0.547777	0	0	Very High	Very Low	Very Low	Very Low	Very Low	Very Low	Very Low	Very Low	Moderate	Very Low	Very Low	Very High	12.9583	0	0	0	0	0	0	0.243459	2.00854	0	0	Very High	Very Low	Very Low	Very Low	Very Low	Very Low	Very Low	Low	Very High	Very Low	Very Low	Very High	Very High	0
103453	GB109053022000	0.494917	0	0	0	0	0	0	0.108856	0.467939	0	0	Moderate	Very Low	Very Low	Very Low	Very Low	Very Low	Very Low	Very Low	Moderate	Very Low	Very Low	Moderate	1.98177	0	0	0	0	0	0	0.184965	1.73405	0	0	Very High	Very Low	Very Low	Very Low	Very Low	Very Low	Very Low	Very Low	Very High	Very Low	Very Low	Very High	Very High	0
103453	GB109053022080	1	0	0	0	0	0	0	1	1	0	0	Very High	Very Low	Very Low	Very Low	Very Low	Very Low	Very Low	Very High	Very High	Very Low	Very Low	Very High	1.98177	0	0	0	0	0	0	0.184965	1.73405	0	0	Very High	Very Low	Very Low	Very Low	Very Low	Very Low	Very Low	Very Low	Very High	Very Low	Very Low	Very High	Very High	0
103629	GB109053022140	0.0101832	0	0	0	0	0	0	0.001356	0.00997487	0.00109202	0	Very Low	Very Low	Very Low	Very Low	Very Low	Very Low	Very Low	Very Low	Very Low	Very Low	Very Low	Very Low	0.015305	0	0	0	0	0	0	0.00142847	0.0133919	0.00109322	0	Very Low	Very Low	Very Low	Very Low	Very Low	Very Low	Very Low	Very Low	Very Low	Very Low	Very Low	Very Low	Very Low	0
103731	GB109053022050	0.44674	0	0	0	0	0	0	0.0671661	0.426296	0	0	Moderate	Very Low	Very Low	Very Low	Very Low	Very Low	Very Low	Very Low	Moderate	Very Low	Very Low	Moderate	1.01408	0	0	0	0	0	0	0.0946472	0.887317	0	0	Very High	Very Low	Very Low	Very Low	Very Low	Very Low	Very Low	Very Low	Very High	Very Low	Very Low	Very High	Very High	0
103775	GB109054026650	0.0180328	0	0	0	0	0	0	0.00796961	0.026229	0	0	Very Low	Very Low	Very Low	Very Low	Very Low	Very Low	Very Low	Very Low	Very Low	Very Low	Very Low	Very Low	0.235992	0	0	0	0	0	0	0.0220259	0.206493	0	0	Low	Very Low	Very Low	Very Low	Very Low	Very Low	Very Low	Very Low	Low	Very Low	Very Low	Low	Low	0
103843	GB108052015160	0.000174298	0	0	0	0	0	0	0.000137779	0.000295578	0	0	Very Low	Very Low	Very Low	Very Low	Very Low	Very Low	Very Low	Very Low	Very Low	Very Low	Very Low	Very Low	0.0126498	0	0	0	0	0	0	0.00118065	0.0110686	0	0	Very Low	Very Low	Very Low	Very Low	Very Low	Very Low	Very Low	Very Low	Very Low	Very Low	Very Low	Very Low	Very Low	0
112	GB104027063150	0.0884755	0	0	0	0	0	0	0.0884755	0.0884755	0	0	Very Low	Very Low	Very Low	Very Low	Very Low	Very Low	Very Low	Very Low	Very Low	Very Low	Very Low	Very Low	0.0970632	0	0	0	0	0	0	0.0970632	0.0970632	0	0	Very Low	Very Low	Very Low	Very Low	Very Low	Very Low	Very Low	Very Low	Very Low	Very Low	Very Low	Very Low	Very Low	0
1120	GB104027062970	0.000413813	0	0	0	0	0	0	0.000413813	0.000413813	0	0	Very Low	Very Low	Very Low	Very Low	Very Low	Very Low	Very Low	Very Low	Very Low	Very Low	Very Low	Very Low	0.000413984	0	0	0	0	0	0	0.000413984	0.000413984	0	0	Very Low	Very Low	Very Low	Very Low	Very Low	Very Low	Very Low	Very Low	Very Low	Very Low	Very Low	Very Low	Very Low	0
1147	GB104027068330	0	0	0	0	0	0	0	0	0	0	0	Very Low	Very Low	Very Low	Very Low	Very Low	Very Low	Very Low	Very Low	Very Low	Very Low	Very Low	Very Low	NA	NA	NA	NA	NA	NA	NA	NA	NA	NA	NA	NA	NA	NA	NA	NA	NA	NA	NA	NA	NA	NA	NA	Very Low	0
1158	GB104027063370	0	0	0	0	0	0	0	0	0	0	0	Very Low	Very Low	Very Low	Very Low	Very Low	Very Low	Very Low	Very Low	Very Low	Very Low	Very Low	Very Low	NA	NA	NA	NA	NA	NA	NA	NA	NA	NA	NA	NA	NA	NA	NA	NA	NA	NA	NA	NA	NA	NA	NA	Very Low	0
1247	GB104027063430	0	0	0	0	0	0	0	0	0	0	0	Very Low	Very Low	Very Low	Very Low	Very Low	Very Low	Very Low	Very Low	Very Low	Very Low	Very Low	Very Low	0	0	0	0	0	0	0	0	0	0	0	Very Low	Very Low	Very Low	Very Low	Very Low	Very Low	Very Low	Very Low	Very Low	Very Low	Very Low	Very Low	Very Low	0
1389	GB104027062530	0.00713885	0	0	0	0	0	0	0	0.00637755	0	0	Very Low	Very Low	Very Low	Very Low	Very Low	Very Low	Very Low	Very Low	Very Low	Very Low	Very Low	Very Low	0.0268836	0	0	0	0	0	0	0	0.0268836	0	0	Very Low	Very Low	Very Low	Very Low	Very Low	Very Low	Very Low	Very Low	Very Low	Very Low	Very Low	Very Low	Very Low	0
1433	GB104027062570	0.000131814	0	0	0	0	0	0	0	0.000138346	0	0	Very Low	Very Low	Very Low	Very Low	Very Low	Very Low	Very Low	Very Low	Very Low	Very Low	Very Low	Very Low	0.0156669	0	0	0	0	0	0	0	0.0156669	0	0	Very Low	Very Low	Very Low	Very Low	Very Low	Very Low	Very Low	Very Low	Very Low	Very Low	Very Low	Very Low	Very Low	0
15/47/1/P/9	GB108047004000	0.40119	0	0	0	0	0	0	0.133974	0.424366	0	0	Moderate	Very Low	Very Low	Very Low	Very Low	Very Low	Very Low	Very Low	Moderate	Very Low	Very Low	Moderate	1.6575	0	0	0	0	0	0	0.1547	1.45031	0	0	Very High	Very Low	Very Low	Very Low	Very Low	Very Low	Very Low	Very Low	Very High	Very Low	Very Low	Very High	Very High	0
15/47/41/P/5	GB108047007950	0.675893	0	0	0	0	0	0	0	0.645983	0	0	High	Very Low	Very Low	Very Low	Very Low	Very Low	Very Low	Very Low	High	Very Low	Very Low	High	2.0854	0	0	0	0	0	0	0	1.82473	0	0	Very High	Very Low	Very Low	Very Low	Very Low	Very Low	Very Low	Very Low	Very High	Very Low	Very Low	Very High	Very High	0
15/47/41/P/6	GB108047007850	0.143372	0	0	0	0	0	0	0.0169063	0.122468	0	0	Very Low	Very Low	Very Low	Very Low	Very Low	Very Low	Very Low	Very Low	Very Low	Very Low	Very Low	Very Low	2.68482	0	0	0	0	0	0	0.250583	2.34922	0	0	Very High	Very Low	Very Low	Very Low	Very Low	Very Low	Very Low	Low	Very High	Very Low	Very Low	Very High	Very High	0
15/47/52/P/11	GB108047008010	0.451034	0	0	0	0	0	0	0	0.41389	0	0	Moderate	Very Low	Very Low	Very Low	Very Low	Very Low	Very Low	Very Low	Moderate	Very Low	Very Low	Moderate	0.885508	0	0	0	0	0	0	0	0.774819	0	0	Very High	Very Low	Very Low	Very Low	Very Low	Very Low	Very Low	Very Low	High	Very Low	Very Low	Very High	Very High	0
15/47/9/P/6	GB108047008030	1	0	0	0	0	0	0	0	1	0	0	Very High	Very Low	Very Low	Very Low	Very Low	Very Low	Very Low	Very Low	Very High	Very Low	Very Low	Very High	0.117835	0	0	0	0	0	0	0	0.103105	0	0	Very Low	Very Low	Very Low	Very Low	Very Low	Very Low	Very Low	Very Low	Very Low	Very Low	Very Low	Very Low	Very High	0
15/48/171/P/3A	GB108048002320	0.116458	0	0	0	0	0	0	0.0108311	0.167458	0	0	Very Low	Very Low	Very Low	Very Low	Very Low	Very Low	Very Low	Very Low	Very Low	Very Low	Very Low	Very Low	1.90769	0	0	0	0	0	0	0.178051	1.66923	0	0	Very High	Very Low	Very Low	Very Low	Very Low	Very Low	Very Low	Very Low	Very High	Very Low	Very Low	Very High	Very High	0
15/48/174/P/1	GB510804806400	0.000516927	0	0	0	0	0	0	0	0.00122497	0	0	Very Low	Very Low	Very Low	Very Low	Very Low	Very Low	Very Low	Very Low	Very Low	Very Low	Very Low	Very Low	0.621242	0	0	0	0	0	0	0	0.543587	0	0	High	Very Low	Very Low	Very Low	Very Low	Very Low	Very Low	Very Low	Moderate	Very Low	Very Low	High	High	1
15/48/231/P/19	GB650806330000	0.0512865	0	0	0	0	0	0	0	0.04794	0	0	Very Low	Very Low	Very Low	Very Low	Very Low	Very Low	Very Low	Very Low	Very Low	Very Low	Very Low	Very Low	0.368205	0	0	0	0	0	0	0	0.322179	0	0	Low	Very Low	Very Low	Very Low	Very Low	Very Low	Very Low	Very Low	Low	Very Low	Very Low	Low	Low	7
15/48/24/P/4	GB620806570000	0.0183901	0	0	0	0	0	0	0	0.012954	0	0	Very Low	Very Low	Very Low	Very Low	Very Low	Very Low	Very Low	Very Low	Very Low	Very Low	Very Low	Very Low	0.288226	0	0	0	0	0	0	0	0.252198	0	0	Low	Very Low	Very Low	Very Low	Very Low	Very Low	Very Low	Very Low	Low	Very Low	Very Low	Low	Low	8
15/49/281/P/16	GB108049007060	0.611521	0	0	0	0	0	0	0.0287253	0.196136	0.0998334	0	High	Very Low	Very Low	Very Low	Very Low	Very Low	Very Low	Very Low	Very Low	Very Low	Very Low	High	1.57414	0	0	0	0	0	0	0.0295748	0.243992	0.110905	0	Very High	Very Low	Very Low	Very Low	Very Low	Very Low	Very Low	Very Low	Low	Very Low	Very Low	Very High	Very High	0
15/49/30/P/10	GB108049013760	0.71958	0	0	0	0	0	0	0	0.691864	0	0	High	Very Low	Very Low	Very Low	Very Low	Very Low	Very Low	Very Low	High	Very Low	Very Low	High	2.56608	0	0	0	0	0	0	0	2.24532	0	0	Very High	Very Low	Very Low	Very Low	Very Low	Very Low	Very Low	Very Low	Very High	Very Low	Very Low	Very High	Very High	0
1569	GB104026066690	0.114064	0	0	0	0	0	0	0	0.0318901	0	0	Very Low	Very Low	Very Low	Very Low	Very Low	Very Low	Very Low	Very Low	Very Low	Very Low	Very Low	Very Low	0.120002	0	0	0	0	0	0	0	0.120002	0	0	Very Low	Very Low	Very Low	Very Low	Very Low	Very Low	Very Low	Very Low	Very Low	Very Low	Very Low	Very Low	Very Low	0
1569	GB530402609203	0.00848758	0	0	0	0	0	0	0	0.00509018	0	0	Very Low	Very Low	Very Low	Very Low	Very Low	Very Low	Very Low	Very Low	Very Low	Very Low	Very Low	Very Low	0.120002	0	0	0	0	0	0	0	0.120002	0	0	Very Low	Very Low	Very Low	Very Low	Very Low	Very Low	Very Low	Very Low	Very Low	Very Low	Very Low	Very Low	Very Low	0
1586	GB104027063173	4.65e-05	0	0	0	0	0	0	0	2.89e-05	0	0	Very Low	Very Low	Very Low	Very Low	Very Low	Very Low	Very Low	Very Low	Very Low	Very Low	Very Low	Very Low	0.000956965	0	0	0	0	0	0	0	0.000956965	0	0	Very Low	Very Low	Very Low	Very Low	Very Low	Very Low	Very Low	Very Low	Very Low	Very Low	Very Low	Very Low	Very Low	0
1605	GB104027069360	0	0	0	0	0	0	0	0	0	0	0	Very Low	Very Low	Very Low	Very Low	Very Low	Very Low	Very Low	Very Low	Very Low	Very Low	Very Low	Very Low	NA	NA	NA	NA	NA	NA	NA	NA	NA	NA	NA	NA	NA	NA	NA	NA	NA	NA	NA	NA	NA	NA	NA	Very Low	0
1614	GB104027057500	0.00685573	0	0	0	0	0	0	0.0212935	0.00933837	0	0	Very Low	Very Low	Very Low	Very Low	Very Low	Very Low	Very Low	Very Low	Very Low	Very Low	Very Low	Very Low	0.0360868	0	0	0	0	0	0	0.0360868	0.0360868	0	0	Very Low	Very Low	Very Low	Very Low	Very Low	Very Low	Very Low	Very Low	Very Low	Very Low	Very Low	Very Low	Very Low	0
1653	GB104027062760	0.000146623	0	0	0	0	0	0	0.0003999	0.000493089	0	0	Very Low	Very Low	Very Low	Very Low	Very Low	Very Low	Very Low	Very Low	Very Low	Very Low	Very Low	Very Low	0.0186461	0	0	0	0	0	0	0.0186461	0.0186461	0	0	Very Low	Very Low	Very Low	Very Low	Very Low	Very Low	Very Low	Very Low	Very Low	Very Low	Very Low	Very Low	Very Low	0
1653	GB104027069593	2.17e-06	0	0	0	0	0	0	1.45e-05	5.56e-06	0	0	Very Low	Very Low	Very Low	Very Low	Very Low	Very Low	Very Low	Very Low	Very Low	Very Low	Very Low	Very Low	0.0186461	0	0	0	0	0	0	0.0186461	0.0186461	0	0	Very Low	Very Low	Very Low	Very Low	Very Low	Very Low	Very Low	Very Low	Very Low	Very Low	Very Low	Very Low	Very Low	0
1655	GB104027068110	0	0	0	0	0	0	0	0	0	0	0	Very Low	Very Low	Very Low	Very Low	Very Low	Very Low	Very Low	Very Low	Very Low	Very Low	Very Low	Very Low	NA	NA	NA	NA	NA	NA	NA	NA	NA	NA	NA	NA	NA	NA	NA	NA	NA	NA	NA	NA	NA	NA	NA	Very Low	0
1656	GB104027068170	0	0	0	0	0	0	0	0	0	0	0	Very Low	Very Low	Very Low	Very Low	Very Low	Very Low	Very Low	Very Low	Very Low	Very Low	Very Low	Very Low	NA	NA	NA	NA	NA	NA	NA	NA	NA	NA	NA	NA	NA	NA	NA	NA	NA	NA	NA	NA	NA	NA	NA	Very Low	0
1659	GB104027068720	0	0	0	0	0	0	0	0	0	0	0	Very Low	Very Low	Very Low	Very Low	Very Low	Very Low	Very Low	Very Low	Very Low	Very Low	Very Low	Very Low	NA	NA	NA	NA	NA	NA	NA	NA	NA	NA	NA	NA	NA	NA	NA	NA	NA	NA	NA	NA	NA	NA	NA	Very Low	1
1685	GB104027069360	0	0	0	0	0	0	0	0	0	0	0	Very Low	Very Low	Very Low	Very Low	Very Low	Very Low	Very Low	Very Low	Very Low	Very Low	Very Low	Very Low	NA	NA	NA	NA	NA	NA	NA	NA	NA	NA	NA	NA	NA	NA	NA	NA	NA	NA	NA	NA	NA	NA	NA	Very Low	0
1694	GB104027057700	0.0143968	0	0	0	0	0	0	0.0160712	0.015188	0	0	Very Low	Very Low	Very Low	Very Low	Very Low	Very Low	Very Low	Very Low	Very Low	Very Low	Very Low	Very Low	0.0231852	0	0	0	0	0	0	0.0231852	0.0231852	0	0	Very Low	Very Low	Very Low	Very Low	Very Low	Very Low	Very Low	Very Low	Very Low	Very Low	Very Low	Very Low	Very Low	0
1850	GB104027063032	1.47e-06	0	0	0	0	0	0	1.08e-05	2.61e-06	0	0	Very Low	Very Low	Very Low	Very Low	Very Low	Very Low	Very Low	Very Low	Very Low	Very Low	Very Low	Very Low	0.0174216	0	0	0	0	0	0	0.0174216	0.0174216	0	0	Very Low	Very Low	Very Low	Very Low	Very Low	Very Low	Very Low	Very Low	Very Low	Very Low	Very Low	Very Low	Very Low	0
1863	GB104027057710	0.346381	0	0	0	0	0	0	0.243102	0.319088	0	0	Low	Very Low	Very Low	Very Low	Very Low	Very Low	Very Low	Low	Low	Very Low	Very Low	Low	0.892981	0	0	0	0	0	0	0.37884	0.781358	0	0	Very High	Very Low	Very Low	Very Low	Very Low	Very Low	Very Low	Low	High	Very Low	Very Low	Very High	Very High	0
1866	GB104027057290	0.0675923	0	0	0	0	0	0	0.0623605	0.079503	0	0	Very Low	Very Low	Very Low	Very Low	Very Low	Very Low	Very Low	Very Low	Very Low	Very Low	Very Low	Very Low	0.105816	0	0	0	0	0	0	0.105816	0.105816	0	0	Very Low	Very Low	Very Low	Very Low	Very Low	Very Low	Very Low	Very Low	Very Low	Very Low	Very Low	Very Low	Very Low	0
1943	GB104027062760	0.0196462	0	0	0	0	0	0	0.00116275	0.00680391	0	0	Very Low	Very Low	Very Low	Very Low	Very Low	Very Low	Very Low	Very Low	Very Low	Very Low	Very Low	Very Low	0.345325	0	0	0	0	0	0	0.0322303	0.302159	0	0	Low	Very Low	Very Low	Very Low	Very Low	Very Low	Very Low	Very Low	Low	Very Low	Very Low	Low	Low	0
1943	GB104027064243	0.103135	0	0	0	0	0	0	0.00332984	0.0424074	0	0	Very Low	Very Low	Very Low	Very Low	Very Low	Very Low	Very Low	Very Low	Very Low	Very Low	Very Low	Very Low	0.345325	0	0	0	0	0	0	0.0322303	0.302159	0	0	Low	Very Low	Very Low	Very Low	Very Low	Very Low	Very Low	Very Low	Low	Very Low	Very Low	Low	Low	0
1945	GB104027062760	0.0971705	0	0	0	0	0	0	0.0237461	0.110855	0	0	Very Low	Very Low	Very Low	Very Low	Very Low	Very Low	Very Low	Very Low	Very Low	Very Low	Very Low	Very Low	1.1205	0	0	0	0	0	0	0.10458	0.980438	0	0	Very High	Very Low	Very Low	Very Low	Very Low	Very Low	Very Low	Very Low	Very High	Very Low	Very Low	Very High	Very High	0
1945	GB70410066	1	0	0	0	0	0	0	1	1	0	0	Very High	Very Low	Very Low	Very Low	Very Low	Very Low	Very Low	Very High	Very High	Very Low	Very Low	Very High	1.1205	0	0	0	0	0	0	0.10458	0.980438	0	0	Very High	Very Low	Very Low	Very Low	Very Low	Very Low	Very Low	Very Low	Very High	Very Low	Very Low	Very High	Very High	0
1946	GB104027064270	1.25e-06	0	0	0	0	0	0	0.000917506	9.33e-06	0	0	Very Low	Very Low	Very Low	Very Low	Very Low	Very Low	Very Low	Very Low	Very Low	Very Low	Very Low	Very Low	0.00309172	0	0	0	0	0	0	0.00309172	0.00309172	0	0	Very Low	Very Low	Very Low	Very Low	Very Low	Very Low	Very Low	Very Low	Very Low	Very Low	Very Low	Very Low	Very Low	0
1978	GB104027057541	0	0	0	0	0	0	0	0	0	0	0	Very Low	Very Low	Very Low	Very Low	Very Low	Very Low	Very Low	Very Low	Very Low	Very Low	Very Low	Very Low	0.00876625	0	0	0	0	0	0	0.00876625	0.00876625	0	0	Very Low	Very Low	Very Low	Very Low	Very Low	Very Low	Very Low	Very Low	Very Low	Very Low	Very Low	Very Low	Very Low	0
1978	GB104027064243	0.00057471	0	0	0	0	0	0	0.00042754	0.0010591	0	0	Very Low	Very Low	Very Low	Very Low	Very Low	Very Low	Very Low	Very Low	Very Low	Very Low	Very Low	Very Low	0.00876625	0	0	0	0	0	0	0.00876625	0.00876625	0	0	Very Low	Very Low	Very Low	Very Low	Very Low	Very Low	Very Low	Very Low	Very Low	Very Low	Very Low	Very Low	Very Low	0
200261/FN/01	GB620806110003	0	0	0	0	0	0	0	0	0	0	0	Very Low	Very Low	Very Low	Very Low	Very Low	Very Low	Very Low	Very Low	Very Low	Very Low	Very Low	Very Low	0	0	0	0	0	0	0	0	0	0	0	Very Low	Very Low	Very Low	Very Low	Very Low	Very Low	Very Low	Very Low	Very Low	Very Low	Very Low	Very Low	Very Low	12
200356/FN/01	GB108050019980	0.000455861	0	0	0	0	0	0	9.57e-05	0.000502232	0	0	Very Low	Very Low	Very Low	Very Low	Very Low	Very Low	Very Low	Very Low	Very Low	Very Low	Very Low	Very Low	0.00165544	0	0	0	0	0	0	0.000154508	0.00144851	0	0	Very Low	Very Low	Very Low	Very Low	Very Low	Very Low	Very Low	Very Low	Very Low	Very Low	Very Low	Very Low	Very Low	0
200357/FN/01	GB108046005230	0.100495	0	0	0	0	0	0	0.100495	0.100495	0	0	Very Low	Very Low	Very Low	Very Low	Very Low	Very Low	Very Low	Very Low	Very Low	Very Low	Very Low	Very Low	0.111722	0	0	0	0	0	0	0.111722	0.111722	0	0	Very Low	Very Low	Very Low	Very Low	Very Low	Very Low	Very Low	Very Low	Very Low	Very Low	Very Low	Very Low	Very Low	0
200364	GB108050013930	0.170012	0	0	0	0	0	0	0.0244547	0.144782	0	0	Very Low	Very Low	Very Low	Very Low	Very Low	Very Low	Very Low	Very Low	Very Low	Very Low	Very Low	Very Low	1.16389	0	0	0	0	0	0	0.10863	1.0184	0	0	Very High	Very Low	Very Low	Very Low	Very Low	Very Low	Very Low	Very Low	Very High	Very Low	Very Low	Very High	Very High	0
200365/FN/01	GB108050014090	0.0723201	0	0	0	0	0	0	0.00924575	0.0661896	0	0	Very Low	Very Low	Very Low	Very Low	Very Low	Very Low	Very Low	Very Low	Very Low	Very Low	Very Low	Very Low	0.140267	0	0	0	0	0	0	0.0130916	0.122733	0	0	Very Low	Very Low	Very Low	Very Low	Very Low	Very Low	Very Low	Very Low	Very Low	Very Low	Very Low	Very Low	Very Low	0
200366	GB108045008840	0.30885	0	0	0	0	0	0	0.0400374	0.281095	0	0	Low	Very Low	Very Low	Very Low	Very Low	Very Low	Very Low	Very Low	Low	Very Low	Very Low	Low	0.446863	0	0	0	0	0	0	0.0417072	0.391005	0	0	Moderate	Very Low	Very Low	Very Low	Very Low	Very Low	Very Low	Very Low	Low	Very Low	Very Low	Moderate	Moderate	0
200400	GB108046004940	0	0	0	0	0	0	0	0	0	0	0	Very Low	Very Low	Very Low	Very Low	Very Low	Very Low	Very Low	Very Low	Very Low	Very Low	Very Low	Very Low	NA	NA	NA	NA	NA	NA	NA	NA	NA	NA	NA	NA	NA	NA	NA	NA	NA	NA	NA	NA	NA	NA	NA	Very Low	0
200402	GB108050014460	0	0	0	0	0	0	0	0	0	0	0	Very Low	Very Low	Very Low	Very Low	Very Low	Very Low	Very Low	Very Low	Very Low	Very Low	Very Low	Very Low	NA	NA	NA	NA	NA	NA	NA	NA	NA	NA	NA	NA	NA	NA	NA	NA	NA	NA	NA	NA	NA	NA	NA	Very Low	0
200403	GB108050014470	0.375042	0	0	0	0	0	0	0.103676	0.344302	0	0	Low	Very Low	Very Low	Very Low	Very Low	Very Low	Very Low	Very Low	Low	Very Low	Very Low	Low	2.28017	0	0	0	0	0	0	0.212816	1.99515	0	0	Very High	Very Low	Very Low	Very Low	Very Low	Very Low	Very Low	Low	Very High	Very Low	Very Low	Very High	Very High	0
200411	GB108050008230	0	0	0	0	0	0	0	0.0456354	0	0	0	Very Low	Very Low	Very Low	Very Low	Very Low	Very Low	Very Low	Very Low	Very Low	Very Low	Very Low	Very Low	0	0	0	0	0	0	0	0.0478176	0	0	0	Very Low	Very Low	Very Low	Very Low	Very Low	Very Low	Very Low	Very Low	Very Low	Very Low	Very Low	Very Low	Very Low	0
200413	GB108050008140	0.23262	0	0	0	0	0	0	0.0275142	0.209638	0	0	Low	Very Low	Very Low	Very Low	Very Low	Very Low	Very Low	Very Low	Low	Very Low	Very Low	Low	0.303135	0	0	0	0	0	0	0.0282926	0.265243	0	0	Low	Very Low	Very Low	Very Low	Very Low	Very Low	Very Low	Very Low	Low	Very Low	Very Low	Low	Low	0
200417	GB108050014310	0	0	0	0	0	0	0	0	0	0	0	Very Low	Very Low	Very Low	Very Low	Very Low	Very Low	Very Low	Very Low	Very Low	Very Low	Very Low	Very Low	NA	NA	NA	NA	NA	NA	NA	NA	NA	NA	NA	NA	NA	NA	NA	NA	NA	NA	NA	NA	NA	NA	NA	Very Low	0
200819	GB108045008910	1	0	0	0	0	0	0	0	1	0	0	Very High	Very Low	Very Low	Very Low	Very Low	Very Low	Very Low	Very Low	Very High	Very Low	Very Low	Very High	0.757074	0	0	0	0	0	0	0	0.66244	0	0	High	Very Low	Very Low	Very Low	Very Low	Very Low	Very Low	Very Low	High	Very Low	Very Low	High	Very High	0
200819	GB510804505600	0.0451509	0	0	0	0	0	0	0	0.0175513	0	0	Very Low	Very Low	Very Low	Very Low	Very Low	Very Low	Very Low	Very Low	Very Low	Very Low	Very Low	Very Low	0.757074	0	0	0	0	0	0	0	0.66244	0	0	High	Very Low	Very Low	Very Low	Very Low	Very Low	Very Low	Very Low	High	Very Low	Very Low	High	High	2
200819	GB650806420000	0.0555582	0	0	0	0	0	0	0	0.0350759	0	0	Very Low	Very Low	Very Low	Very Low	Very Low	Very Low	Very Low	Very Low	Very Low	Very Low	Very Low	Very Low	0.757074	0	0	0	0	0	0	0	0.66244	0	0	High	Very Low	Very Low	Very Low	Very Low	Very Low	Very Low	Very Low	High	Very Low	Very Low	High	High	17
200834	GB108045009160	0.140613	0	0	0	0	0	0	0	0.125237	0	0	Very Low	Very Low	Very Low	Very Low	Very Low	Very Low	Very Low	Very Low	Very Low	Very Low	Very Low	Very Low	1.48077	0	0	0	0	0	0	0	1.29567	0	0	Very High	Very Low	Very Low	Very Low	Very Low	Very Low	Very Low	Very Low	Very High	Very Low	Very Low	Very High	Very High	0
200834	GB650806420000	0.150706	0	0	0	0	0	0	0	0.0951462	0	0	Very Low	Very Low	Very Low	Very Low	Very Low	Very Low	Very Low	Very Low	Very Low	Very Low	Very Low	Very Low	1.48077	0	0	0	0	0	0	0	1.29567	0	0	Very High	Very Low	Very Low	Very Low	Very Low	Very Low	Very Low	Very Low	Very High	Very Low	Very Low	Very High	Very High	17
200926	GB510804605900	0.00136096	0	0	0	0	0	0	0.00309183	0.00129589	0	0	Very Low	Very Low	Very Low	Very Low	Very Low	Very Low	Very Low	Very Low	Very Low	Very Low	Very Low	Very Low	2.63135	0	0	0	0	0	0	0.245592	2.30243	0	0	Very High	Very Low	Very Low	Very Low	Very Low	Very Low	Very Low	Low	Very High	Very Low	Very Low	Very High	Very High	1
200927	GB108045014960	0.214449	0	0	0	0	0	0	0.0248462	0.192812	0	0	Low	Very Low	Very Low	Very Low	Very Low	Very Low	Very Low	Very Low	Very Low	Very Low	Very Low	Low	0.272992	0	0	0	0	0	0	0.0254793	0.238868	0	0	Low	Very Low	Very Low	Very Low	Very Low	Very Low	Very Low	Very Low	Low	Very Low	Very Low	Low	Low	0
200928	GB108050014350	0	0	0	0	0	0	0	0	0	0	0	Very Low	Very Low	Very Low	Very Low	Very Low	Very Low	Very Low	Very Low	Very Low	Very Low	Very Low	Very Low	NA	NA	NA	NA	NA	NA	NA	NA	NA	NA	NA	NA	NA	NA	NA	NA	NA	NA	NA	NA	NA	NA	NA	Very Low	0
200976	GB108045009070	0.903052	0	0	0	0	0	0	0	0.885074	0	0	Very High	Very Low	Very Low	Very Low	Very Low	Very Low	Very Low	Very Low	Very High	Very Low	Very Low	Very High	3.17076	0	0	0	0	0	0	0	2.77441	0	0	Very High	Very Low	Very Low	Very Low	Very Low	Very Low	Very Low	Very Low	Very High	Very Low	Very Low	Very High	Very High	0
200976	GB108046005330	1	0	0	0	0	0	0	0	1	0	0	Very High	Very Low	Very Low	Very Low	Very Low	Very Low	Very Low	Very Low	Very High	Very Low	Very Low	Very High	3.17076	0	0	0	0	0	0	0	2.77441	0	0	Very High	Very Low	Very Low	Very Low	Very Low	Very Low	Very Low	Very Low	Very High	Very Low	Very Low	Very High	Very High	0
200976	GB510804605900	0.831383	0	0	0	0	0	0	0	0.791634	0	0	Very High	Very Low	Very Low	Very Low	Very Low	Very Low	Very Low	Very Low	High	Very Low	Very Low	Very High	3.17076	0	0	0	0	0	0	0	2.77441	0	0	Very High	Very Low	Very Low	Very Low	Very Low	Very Low	Very Low	Very Low	Very High	Very Low	Very Low	Very High	Very High	1
200976	GB650806420000	0.0965227	0	0	0	0	0	0	0	0.380864	0	0	Very Low	Very Low	Very Low	Very Low	Very Low	Very Low	Very Low	Very Low	Low	Very Low	Very Low	Low	3.17076	0	0	0	0	0	0	0	2.77441	0	0	Very High	Very Low	Very Low	Very Low	Very Low	Very Low	Very Low	Very Low	Very High	Very Low	Very Low	Very High	Very High	17
200976	GB680806320000	0.514953	0	0	0	0	0	0	0	0.481583	0	0	Moderate	Very Low	Very Low	Very Low	Very Low	Very Low	Very Low	Very Low	Moderate	Very Low	Very Low	Moderate	3.17076	0	0	0	0	0	0	0	2.77441	0	0	Very High	Very Low	Very Low	Very Low	Very Low	Very Low	Very Low	Very Low	Very High	Very Low	Very Low	Very High	Very High	8
201	GB104027063260	0	0	0	0	0	0	0	0	0	0	0	Very Low	Very Low	Very Low	Very Low	Very Low	Very Low	Very Low	Very Low	Very Low	Very Low	Very Low	Very Low	NA	NA	NA	NA	NA	NA	NA	NA	NA	NA	NA	NA	NA	NA	NA	NA	NA	NA	NA	NA	NA	NA	NA	Very Low	0
201033	GB108050014190	0.580576	0	0	0	0	0	0	0.129175	0.543789	0	0	Moderate	Very Low	Very Low	Very Low	Very Low	Very Low	Very Low	Very Low	Moderate	Very Low	Very Low	Moderate	1.58932	0	0	0	0	0	0	0.148336	1.39065	0	0	Very High	Very Low	Very Low	Very Low	Very Low	Very Low	Very Low	Very Low	Very High	Very Low	Very Low	Very High	Very High	0
201053	GB108050014320	0	0	0	0	0	0	0	0	0	0	0	Very Low	Very Low	Very Low	Very Low	Very Low	Very Low	Very Low	Very Low	Very Low	Very Low	Very Low	Very Low	NA	NA	NA	NA	NA	NA	NA	NA	NA	NA	NA	NA	NA	NA	NA	NA	NA	NA	NA	NA	NA	NA	NA	Very Low	0
201054	GB108050014660	0	0	0	0	0	0	0	0	0	0	0	Very Low	Very Low	Very Low	Very Low	Very Low	Very Low	Very Low	Very Low	Very Low	Very Low	Very Low	Very Low	NA	NA	NA	NA	NA	NA	NA	NA	NA	NA	NA	NA	NA	NA	NA	NA	NA	NA	NA	NA	NA	NA	NA	Very Low	0
201064	GB108046008370	0.889332	0	0	0	0	0	0	0.428582	0.875491	0	0	Very High	Very Low	Very Low	Very Low	Very Low	Very Low	Very Low	Moderate	Very High	Very Low	Very Low	Very High	8.03605	0	0	0	0	0	0	0.750032	7.03155	0	0	Very High	Very Low	Very Low	Very Low	Very Low	Very Low	Very Low	High	Very High	Very Low	Very Low	Very High	Very High	0
201127	GB610807680003	0.00328158	0	0	0	0	0	0	0	0.00699053	0	0	Very Low	Very Low	Very Low	Very Low	Very Low	Very Low	Very Low	Very Low	Very Low	Very Low	Very Low	Very Low	0.0945436	0	0	0	0	0	0	0	0.0827257	0	0	Very Low	Very Low	Very Low	Very Low	Very Low	Very Low	Very Low	Very Low	Very Low	Very Low	Very Low	Very Low	Very Low	6
201238	GB108050014260	0	0	0	0	0	0	0	0	0	0	0	Very Low	Very Low	Very Low	Very Low	Very Low	Very Low	Very Low	Very Low	Very Low	Very Low	Very Low	Very Low	NA	NA	NA	NA	NA	NA	NA	NA	NA	NA	NA	NA	NA	NA	NA	NA	NA	NA	NA	NA	NA	NA	NA	Very Low	0
201437	GB108045015030	1	0	0	0	0	0	0	1	1	0	0	Very High	Very Low	Very Low	Very Low	Very Low	Very Low	Very Low	Very High	Very High	Very Low	Very Low	Very High	17.4373	0	0	0	0	0	0	0.327609	2.70277	0	0	Very High	Very Low	Very Low	Very Low	Very Low	Very Low	Very Low	Low	Very High	Very Low	Very Low	Very High	Very High	0
201437	GB108045015050	0.927095	0	0	0	0	0	0	0.201992	0.663423	0	0	Very High	Very Low	Very Low	Very Low	Very Low	Very Low	Very Low	Low	High	Very Low	Very Low	Very High	17.4373	0	0	0	0	0	0	0.327609	2.70277	0	0	Very High	Very Low	Very Low	Very Low	Very Low	Very Low	Very Low	Low	Very High	Very Low	Very Low	Very High	Very High	0
201967	GB510804606000	0.0559988	0	0	0	0	0	0	0	0.0493443	0	0	Very Low	Very Low	Very Low	Very Low	Very Low	Very Low	Very Low	Very Low	Very Low	Very Low	Very Low	Very Low	0.0593207	0	0	0	0	0	0	0	0.0519056	0	0	Very Low	Very Low	Very Low	Very Low	Very Low	Very Low	Very Low	Very Low	Very Low	Very Low	Very Low	Very Low	Very Low	2
202009	GB108046005340	0.951397	0	0	0	0	0	0	0	0.643126	0	0	Very High	Very Low	Very Low	Very Low	Very Low	Very Low	Very Low	Very Low	High	Very Low	Very Low	Very High	4.05629	0	0	0	0	0	0	0	3.54926	0	0	Very High	Very Low	Very Low	Very Low	Very Low	Very Low	Very Low	Very Low	Very High	Very Low	Very Low	Very High	Very High	0
202009	GB108046005350	1	0	0	0	0	0	0	0	1	0	0	Very High	Very Low	Very Low	Very Low	Very Low	Very Low	Very Low	Very Low	Very High	Very Low	Very Low	Very High	4.05629	0	0	0	0	0	0	0	3.54926	0	0	Very High	Very Low	Very Low	Very Low	Very Low	Very Low	Very Low	Very Low	Very High	Very Low	Very Low	Very High	Very High	0
202009	GB108046008450	0.990187	0	0	0	0	0	0	0	0.900747	0	0	Very High	Very Low	Very Low	Very Low	Very Low	Very Low	Very Low	Very Low	Very High	Very Low	Very Low	Very High	4.05629	0	0	0	0	0	0	0	3.54926	0	0	Very High	Very Low	Very Low	Very Low	Very Low	Very Low	Very Low	Very Low	Very High	Very Low	Very Low	Very High	Very High	0
202009	GB510804605800	0.703786	0	0	0	0	0	0	0	0.675214	0	0	High	Very Low	Very Low	Very Low	Very Low	Very Low	Very Low	Very Low	High	Very Low	Very Low	High	4.05629	0	0	0	0	0	0	0	3.54926	0	0	Very High	Very Low	Very Low	Very Low	Very Low	Very Low	Very Low	Very Low	Very High	Very Low	Very Low	Very High	Very High	1
202009	GB650806420000	0.230502	0	0	0	0	0	0	0	0.145524	0	0	Low	Very Low	Very Low	Very Low	Very Low	Very Low	Very Low	Very Low	Very Low	Very Low	Very Low	Low	4.05629	0	0	0	0	0	0	0	3.54926	0	0	Very High	Very Low	Very Low	Very Low	Very Low	Very Low	Very Low	Very Low	Very High	Very Low	Very Low	Very High	Very High	17
202081	GB610807680003	0.440663	0	0	0	0	0	0	0	0.150194	0	0	Moderate	Very Low	Very Low	Very Low	Very Low	Very Low	Very Low	Very Low	Very Low	Very Low	Very Low	Moderate	1.65067	0	0	0	0	0	0	0	1.44434	0	0	Very High	Very Low	Very Low	Very Low	Very Low	Very Low	Very Low	Very Low	Very High	Very Low	Very Low	Very High	Very High	6
202222	GB540805015500	0	0	0	0	0	0	0	0	0	0	0	Very Low	Very Low	Very Low	Very Low	Very Low	Very Low	Very Low	Very Low	Very Low	Very Low	Very Low	Very Low	NA	NA	NA	NA	NA	NA	NA	NA	NA	NA	NA	NA	NA	NA	NA	NA	NA	NA	NA	NA	NA	NA	NA	Very Low	1
202367	GB108050020010	0.284781	0	0	0	0	0	0	0.0392221	0.265744	0.0389839	0	Low	Very Low	Very Low	Very Low	Very Low	Very Low	Very Low	Very Low	Low	Very Low	Very Low	Low	0.567914	0	0	0	0	0	0	0.0530053	0.496925	0.0405653	0	Moderate	Very Low	Very Low	Very Low	Very Low	Very Low	Very Low	Very Low	Moderate	Very Low	Very Low	Moderate	Moderate	0
202372	GB108045009010	0.551661	0	0	0	0	0	0	0.103012	0.518454	0	0	Moderate	Very Low	Very Low	Very Low	Very Low	Very Low	Very Low	Very Low	Moderate	Very Low	Very Low	Moderate	1.23045	0	0	0	0	0	0	0.114842	1.07665	0	0	Very High	Very Low	Very Low	Very Low	Very Low	Very Low	Very Low	Very Low	Very High	Very Low	Very Low	Very High	Very High	0
202394	GB510804605900	0.0111706	0	0	0	0	0	0	0	0.0106365	0	0	Very Low	Very Low	Very Low	Very Low	Very Low	Very Low	Very Low	Very Low	Very Low	Very Low	Very Low	Very Low	0.110817	0	0	0	0	0	0	0	0.096965	0	0	Very Low	Very Low	Very Low	Very Low	Very Low	Very Low	Very Low	Very Low	Very Low	Very Low	Very Low	Very Low	Very Low	1
202404	GB108051020600	1	0	0	0	0	0	0	0	1	0	0	Very High	Very Low	Very Low	Very Low	Very Low	Very Low	Very Low	Very Low	Very High	Very Low	Very Low	Very High	0.879531	0	0	0	0	0	0	0	0.30295	0	0	Very High	Very Low	Very Low	Very Low	Very Low	Very Low	Very Low	Very Low	Low	Very Low	Very Low	Very High	Very High	0
202404	GB610807680004	0.0444159	0	0	0	0	0	0	0	0.0161492	0	0	Very Low	Very Low	Very Low	Very Low	Very Low	Very Low	Very Low	Very Low	Very Low	Very Low	Very Low	Very Low	0.879531	0	0	0	0	0	0	0	0.30295	0	0	Very High	Very Low	Very Low	Very Low	Very Low	Very Low	Very Low	Very Low	Low	Very Low	Very Low	Very High	Very High	6
202411	GB108045009170	0.0062587	0	0	0	0	0	0	0	0.005745	0	0	Very Low	Very Low	Very Low	Very Low	Very Low	Very Low	Very Low	Very Low	Very Low	Very Low	Very Low	Very Low	0.358389	0	0	0	0	0	0	0	0.313591	0	0	Low	Very Low	Very Low	Very Low	Very Low	Very Low	Very Low	Very Low	Low	Very Low	Very Low	Low	Low	0
202411	GB510804505500	0.410626	0	0	0	0	0	0	0	0.81324	0	0	Moderate	Very Low	Very Low	Very Low	Very Low	Very Low	Very Low	Very Low	Very High	Very Low	Very Low	Very High	0.358389	0	0	0	0	0	0	0	0.313591	0	0	Low	Very Low	Very Low	Very Low	Very Low	Very Low	Very Low	Very Low	Low	Very Low	Very Low	Low	Very High	0
202412	GB620806110003	0	0	0	0	0	0	0	0	0.0221654	0	0	Very Low	Very Low	Very Low	Very Low	Very Low	Very Low	Very Low	Very Low	Very Low	Very Low	Very Low	Very Low	0	0	0	0	0	0	0	0	0.39802	0	0	Very Low	Very Low	Very Low	Very Low	Very Low	Very Low	Very Low	Very Low	Low	Very Low	Very Low	Low	Low	12
202413	GB510804606100	0.388562	0	0	0	0	0	0	0	0.357348	0	0	Low	Very Low	Very Low	Very Low	Very Low	Very Low	Very Low	Very Low	Low	Very Low	Very Low	Low	0.635489	0	0	0	0	0	0	0	0.556053	0	0	High	Very Low	Very Low	Very Low	Very Low	Very Low	Very Low	Very Low	Moderate	Very Low	Very Low	High	High	1
202463	GB108050008080	0	0	0	0	0	0	0	0	0	0	0	Very Low	Very Low	Very Low	Very Low	Very Low	Very Low	Very Low	Very Low	Very Low	Very Low	Very Low	Very Low	0.791976	0	0	0	0	0	0	0.0739177	0.692979	0	0	High	Very Low	Very Low	Very Low	Very Low	Very Low	Very Low	Very Low	High	Very Low	Very Low	High	High	0
202463	GB108050008100	1	0	0	0	0	0	0	1	1	0	0	Very High	Very Low	Very Low	Very Low	Very Low	Very Low	Very Low	Very High	Very High	Very Low	Very Low	Very High	0.791976	0	0	0	0	0	0	0.0739177	0.692979	0	0	High	Very Low	Very Low	Very Low	Very Low	Very Low	Very Low	Very Low	High	Very Low	Very Low	High	Very High	0
202463	GB108050008110	0.41432	0	0	0	0	0	0	0.0619361	0.382331	0	0	Moderate	Very Low	Very Low	Very Low	Very Low	Very Low	Very Low	Very Low	Low	Very Low	Very Low	Moderate	0.791976	0	0	0	0	0	0	0.0739177	0.692979	0	0	High	Very Low	Very Low	Very Low	Very Low	Very Low	Very Low	Very Low	High	Very Low	Very Low	High	High	0
202474	GB108045014980	0.0444963	0	0	0	0	0	0	0.00443533	0.0385923	0	0	Very Low	Very Low	Very Low	Very Low	Very Low	Very Low	Very Low	Very Low	Very Low	Very Low	Very Low	Very Low	0.0593715	0	0	0	0	0	0	0.00554134	0.0519501	0	0	Very Low	Very Low	Very Low	Very Low	Very Low	Very Low	Very Low	Very Low	Very Low	Very Low	Very Low	Very Low	Very Low	0
202475	GB108045008710	1	0	0	0	0	0	0	1	1	0	0	Very High	Very Low	Very Low	Very Low	Very Low	Very Low	Very Low	Very High	Very High	Very Low	Very Low	Very High	6.9866	0	0	0	0	0	0	0.652083	6.11328	0	0	Very High	Very Low	Very Low	Very Low	Very Low	Very Low	Very Low	High	Very High	Very Low	Very Low	Very High	Very High	0
202475	GB108045008750	1	0	0	0	0	0	0	1	1	0	0	Very High	Very Low	Very Low	Very Low	Very Low	Very Low	Very Low	Very High	Very High	Very Low	Very Low	Very High	6.9866	0	0	0	0	0	0	0.652083	6.11328	0	0	Very High	Very Low	Very Low	Very Low	Very Low	Very Low	Very Low	High	Very High	Very Low	Very Low	Very High	Very High	0
202475	GB108045008810	1	0	0	0	0	0	0	1	1	0	0	Very High	Very Low	Very Low	Very Low	Very Low	Very Low	Very Low	Very High	Very High	Very Low	Very Low	Very High	6.9866	0	0	0	0	0	0	0.652083	6.11328	0	0	Very High	Very Low	Very Low	Very Low	Very Low	Very Low	Very Low	High	Very High	Very Low	Very Low	Very High	Very High	0
202475	GB108045008860	0.99058	0	0	0	0	0	0	0.943567	0.990131	0	0	Very High	Very Low	Very Low	Very Low	Very Low	Very Low	Very Low	Very High	Very High	Very Low	Very Low	Very High	6.9866	0	0	0	0	0	0	0.652083	6.11328	0	0	Very High	Very Low	Very Low	Very Low	Very Low	Very Low	Very Low	High	Very High	Very Low	Very Low	Very High	Very High	0
202475	GB108045008980	0.968595	0	0	0	0	0	0	0.876687	0.959431	0	0	Very High	Very Low	Very Low	Very Low	Very Low	Very Low	Very Low	Very High	Very High	Very Low	Very Low	Very High	6.9866	0	0	0	0	0	0	0.652083	6.11328	0	0	Very High	Very Low	Very Low	Very Low	Very Low	Very Low	Very Low	High	Very High	Very Low	Very Low	Very High	Very High	0
202475	GB108045009020	1	0	0	0	0	0	0	1	1	0	0	Very High	Very Low	Very Low	Very Low	Very Low	Very Low	Very Low	Very High	Very High	Very Low	Very Low	Very High	6.9866	0	0	0	0	0	0	0.652083	6.11328	0	0	Very High	Very Low	Very Low	Very Low	Very Low	Very Low	Very Low	High	Very High	Very Low	Very Low	Very High	Very High	0
202475	GB108045009040	1	0	0	0	0	0	0	1	1	0	0	Very High	Very Low	Very Low	Very Low	Very Low	Very Low	Very Low	Very High	Very High	Very Low	Very Low	Very High	6.9866	0	0	0	0	0	0	0.652083	6.11328	0	0	Very High	Very Low	Very Low	Very Low	Very Low	Very Low	Very Low	High	Very High	Very Low	Very Low	Very High	Very High	0
202475	GB108045009050	1	0	0	0	0	0	0	1	1	0	0	Very High	Very Low	Very Low	Very Low	Very Low	Very Low	Very Low	Very High	Very High	Very Low	Very Low	Very High	6.9866	0	0	0	0	0	0	0.652083	6.11328	0	0	Very High	Very Low	Very Low	Very Low	Very Low	Very Low	Very Low	High	Very High	Very Low	Very Low	Very High	Very High	0
202475	GB510804505600	0.265023	0	0	0	0	0	0	1	0.686805	0	0	Low	Very Low	Very Low	Very Low	Very Low	Very Low	Very Low	Very High	High	Very Low	Very Low	Very High	6.9866	0	0	0	0	0	0	0.652083	6.11328	0	0	Very High	Very Low	Very Low	Very Low	Very Low	Very Low	Very Low	High	Very High	Very Low	Very Low	Very High	Very High	2
202541	GB510804505600	0.00204511	0	0	0	0	0	0	0	0.00496865	0	0	Very Low	Very Low	Very Low	Very Low	Very Low	Very Low	Very Low	Very Low	Very Low	Very Low	Very Low	Very Low	0.209428	0	0	0	0	0	0	0	0.183249	0	0	Low	Very Low	Very Low	Very Low	Very Low	Very Low	Very Low	Very Low	Very Low	Very Low	Very Low	Low	Low	2
202563	GB510804505400	0.497975	0	0	0	0	0	0	0	0.464652	0	0	Moderate	Very Low	Very Low	Very Low	Very Low	Very Low	Very Low	Very Low	Moderate	Very Low	Very Low	Moderate	1.11895	0	0	0	0	0	0	0	0.979082	0	0	Very High	Very Low	Very Low	Very Low	Very Low	Very Low	Very Low	Very Low	Very High	Very Low	Very Low	Very High	Very High	0
202563	GB650806420000	0.000468573	0	0	0	0	0	0	0	0.00184892	0	0	Very Low	Very Low	Very Low	Very Low	Very Low	Very Low	Very Low	Very Low	Very Low	Very Low	Very Low	Very Low	1.11895	0	0	0	0	0	0	0	0.979082	0	0	Very High	Very Low	Very Low	Very Low	Very Low	Very Low	Very Low	Very Low	Very High	Very Low	Very Low	Very High	Very High	17
2026	GB104027063171	0.0645563	0	0	0	0	0	0	0.0539252	0.0625388	0	0	Very Low	Very Low	Very Low	Very Low	Very Low	Very Low	Very Low	Very Low	Very Low	Very Low	Very Low	Very Low	0.0953904	0	0	0	0	0	0	0.0953904	0.0953904	0	0	Very Low	Very Low	Very Low	Very Low	Very Low	Very Low	Very Low	Very Low	Very Low	Very Low	Very Low	Very Low	Very Low	0
2026	GB104027063260	0.0549471	0	0	0	0	0	0	0.0918307	0.0546245	0	0	Very Low	Very Low	Very Low	Very Low	Very Low	Very Low	Very Low	Very Low	Very Low	Very Low	Very Low	Very Low	0.0953904	0	0	0	0	0	0	0.0953904	0.0953904	0	0	Very Low	Very Low	Very Low	Very Low	Very Low	Very Low	Very Low	Very Low	Very Low	Very Low	Very Low	Very Low	Very Low	0
202669	GB108050014500	0.981847	0	0	0	0	0	0	0	0.95476	0	0	Very High	Very Low	Very Low	Very Low	Very Low	Very Low	Very Low	Very Low	Very High	Very Low	Very Low	Very High	0.71644	0	0	0	0	0	0	0	0.626885	0	0	High	Very Low	Very Low	Very Low	Very Low	Very Low	Very Low	Very Low	High	Very Low	Very Low	High	Very High	0
202669	GB540805015500	0.265413	0	0	0	0	0	0	0	0.244118	0	0	Low	Very Low	Very Low	Very Low	Very Low	Very Low	Very Low	Very Low	Low	Very Low	Very Low	Low	0.71644	0	0	0	0	0	0	0	0.626885	0	0	High	Very Low	Very Low	Very Low	Very Low	Very Low	Very Low	Very Low	High	Very Low	Very Low	High	High	1
202669	GB610807680003	0.00966198	0	0	0	0	0	0	0	0.0205823	0	0	Very Low	Very Low	Very Low	Very Low	Very Low	Very Low	Very Low	Very Low	Very Low	Very Low	Very Low	Very Low	0.71644	0	0	0	0	0	0	0	0.626885	0	0	High	Very Low	Very Low	Very Low	Very Low	Very Low	Very Low	Very Low	High	Very Low	Very Low	High	High	6
202711	GB510804605900	0.00069503	0	0	0	0	0	0	0	0.0006618	0	0	Very Low	Very Low	Very Low	Very Low	Very Low	Very Low	Very Low	Very Low	Very Low	Very Low	Very Low	Very Low	0.498213	0	0	0	0	0	0	0	0.435937	0	0	Moderate	Very Low	Very Low	Very Low	Very Low	Very Low	Very Low	Very Low	Moderate	Very Low	Very Low	Moderate	Moderate	1
202848	GB108045008980	0.0218886	0	0	0	0	0	0	0.0217928	0.0271019	0	0	Very Low	Very Low	Very Low	Very Low	Very Low	Very Low	Very Low	Very Low	Very Low	Very Low	Very Low	Very Low	2.29999	0	0	0	0	0	0	0.214666	2.01249	0	0	Very High	Very Low	Very Low	Very Low	Very Low	Very Low	Very Low	Low	Very High	Very Low	Very Low	Very High	Very High	0
202999	GB108050014140	0	0	0	0	0	0	0	0	0	0	0	Very Low	Very Low	Very Low	Very Low	Very Low	Very Low	Very Low	Very Low	Very Low	Very Low	Very Low	Very Low	NA	NA	NA	NA	NA	NA	NA	NA	NA	NA	NA	NA	NA	NA	NA	NA	NA	NA	NA	NA	NA	NA	NA	Very Low	0
203007	GB108045015130	0	0	0	0	0	0	0	0	0	0	0	Very Low	Very Low	Very Low	Very Low	Very Low	Very Low	Very Low	Very Low	Very Low	Very Low	Very Low	Very Low	NA	NA	NA	NA	NA	NA	NA	NA	NA	NA	NA	NA	NA	NA	NA	NA	NA	NA	NA	NA	NA	NA	NA	Very Low	0
203009	GB108046008540	0	0	0	0	0	0	0	0	0	0	0	Very Low	Very Low	Very Low	Very Low	Very Low	Very Low	Very Low	Very Low	Very Low	Very Low	Very Low	Very Low	NA	NA	NA	NA	NA	NA	NA	NA	NA	NA	NA	NA	NA	NA	NA	NA	NA	NA	NA	NA	NA	NA	NA	Very Low	0
203010	GB108050014470	0	0	0	0	0	0	0	0	0	0	0	Very Low	Very Low	Very Low	Very Low	Very Low	Very Low	Very Low	Very Low	Very Low	Very Low	Very Low	Very Low	NA	NA	NA	NA	NA	NA	NA	NA	NA	NA	NA	NA	NA	NA	NA	NA	NA	NA	NA	NA	NA	NA	NA	Very Low	0
203012	GB108050014350	0	0	0	0	0	0	0	0	0	0	0	Very Low	Very Low	Very Low	Very Low	Very Low	Very Low	Very Low	Very Low	Very Low	Very Low	Very Low	Very Low	NA	NA	NA	NA	NA	NA	NA	NA	NA	NA	NA	NA	NA	NA	NA	NA	NA	NA	NA	NA	NA	NA	NA	Very Low	0
203013	GB620806110003	0	0	0	0	0	0	0	0	0	0	0	Very Low	Very Low	Very Low	Very Low	Very Low	Very Low	Very Low	Very Low	Very Low	Very Low	Very Low	Very Low	NA	NA	NA	NA	NA	NA	NA	NA	NA	NA	NA	NA	NA	NA	NA	NA	NA	NA	NA	NA	NA	NA	NA	Very Low	12
203020	GB108045015100	0.0421513	0	0	0	0	0	0	0.0327143	0.039148	0	0	Very Low	Very Low	Very Low	Very Low	Very Low	Very Low	Very Low	Very Low	Very Low	Very Low	Very Low	Very Low	0.362364	0	0	0	0	0	0	0.0338207	0.317069	0	0	Low	Very Low	Very Low	Very Low	Very Low	Very Low	Very Low	Very Low	Low	Very Low	Very Low	Low	Low	0
203027	GB108045015100	0.420821	0	0	0	0	0	0	0	0.390837	0	0	Moderate	Very Low	Very Low	Very Low	Very Low	Very Low	Very Low	Very Low	Low	Very Low	Very Low	Moderate	1.00028	0	0	0	0	0	0	0	0.875244	0	0	Very High	Very Low	Very Low	Very Low	Very Low	Very Low	Very Low	Very Low	Very High	Very Low	Very Low	Very High	Very High	0
203034	GB108046004810	1	0	0	0	0	0	0	0	1	0	0	Very High	Very Low	Very Low	Very Low	Very Low	Very Low	Very Low	Very Low	Very High	Very Low	Very Low	Very High	1.53205	0	0	0	0	0	0	0	1.34054	0	0	Very High	Very Low	Very Low	Very Low	Very Low	Very Low	Very Low	Very Low	Very High	Very Low	Very Low	Very High	Very High	0
203034	GB108046004930	0	0	0	0	0	0	0	0	0	0	0	Very Low	Very Low	Very Low	Very Low	Very Low	Very Low	Very Low	Very Low	Very Low	Very Low	Very Low	Very Low	1.53205	0	0	0	0	0	0	0	1.34054	0	0	Very High	Very Low	Very Low	Very Low	Very Low	Very Low	Very Low	Very Low	Very High	Very Low	Very Low	Very High	Very High	0
203034	GB620806110002	0.248724	0	0	0	0	0	0	0	0.11053	0	0	Low	Very Low	Very Low	Very Low	Very Low	Very Low	Very Low	Very Low	Very Low	Very Low	Very Low	Low	1.53205	0	0	0	0	0	0	0	1.34054	0	0	Very High	Very Low	Very Low	Very Low	Very Low	Very Low	Very Low	Very Low	Very High	Very Low	Very Low	Very High	Very High	3
203080	GB108046005160	1	0	0	0	0	0	0	1	1	0	0	Very High	Very Low	Very Low	Very Low	Very Low	Very Low	Very Low	Very High	Very High	Very Low	Very Low	Very High	1.95765	0	0	0	0	0	0	0.182714	1.71294	0	0	Very High	Very Low	Very Low	Very Low	Very Low	Very Low	Very Low	Very Low	Very High	Very Low	Very Low	Very High	Very High	0
203080	GB108046008350	0.00552415	0	0	0	0	0	0	0.00253512	0.00845002	0	0	Very Low	Very Low	Very Low	Very Low	Very Low	Very Low	Very Low	Very Low	Very Low	Very Low	Very Low	Very Low	1.95765	0	0	0	0	0	0	0.182714	1.71294	0	0	Very High	Very Low	Very Low	Very Low	Very Low	Very Low	Very Low	Very Low	Very High	Very Low	Very Low	Very High	Very High	0
203080	GB510804605900	0.0187904	0	0	0	0	0	0	0.0512257	0.0286272	0	0	Very Low	Very Low	Very Low	Very Low	Very Low	Very Low	Very Low	Very Low	Very Low	Very Low	Very Low	Very Low	1.95765	0	0	0	0	0	0	0.182714	1.71294	0	0	Very High	Very Low	Very Low	Very Low	Very Low	Very Low	Very Low	Very Low	Very High	Very Low	Very Low	Very High	Very High	1
203109	GB108045014920	0.636149	0	0	0.0837392	0	0	0	0.0237915	0.334512	0	0.0612799	High	Very Low	Very Low	Very Low	Very Low	Very Low	Very Low	Very Low	Low	Very Low	Very Low	High	1.74837	0	0	0.0913923	0	0	0	0.0243713	0.502658	0	0.0652802	Very High	Very Low	Very Low	Very Low	Very Low	Very Low	Very Low	Very Low	Moderate	Very Low	Very Low	Very High	Very High	0
203113	GB108045015020	0.224884	0	0	0	0	0	0	0.0679154	0.213154	0	0	Low	Very Low	Very Low	Very Low	Very Low	Very Low	Very Low	Very Low	Low	Very Low	Very Low	Low	1.38182	0	0	0	0	0	0	0.12897	1.20909	0	0	Very High	Very Low	Very Low	Very Low	Very Low	Very Low	Very Low	Very Low	Very High	Very Low	Very Low	Very High	Very High	0
203161	GB108050014240	0.589282	0	0	0	0	0	0	0.118097	0.556623	0	0	Moderate	Very Low	Very Low	Very Low	Very Low	Very Low	Very Low	Very Low	Moderate	Very Low	Very Low	Moderate	1.43476	0	0	0	0	0	0	0.133911	1.25542	0	0	Very High	Very Low	Very Low	Very Low	Very Low	Very Low	Very Low	Very Low	Very High	Very Low	Very Low	Very High	Very High	0
203206	GB520804609000	0.0316352	0	0	0	0	0	0	0.00236172	0.0228025	0	0	Very Low	Very Low	Very Low	Very Low	Very Low	Very Low	Very Low	Very Low	Very Low	Very Low	Very Low	Very Low	1.16978	0	0	0	0	0	0	0.109179	1.02356	0	0	Very High	Very Low	Very Low	Very Low	Very Low	Very Low	Very Low	Very Low	Very High	Very Low	Very Low	Very High	Very High	0
203249	GB108045014820	0.591494	0	0	0	0	0	0	0.119052	0.558879	0	0	Moderate	Very Low	Very Low	Very Low	Very Low	Very Low	Very Low	Very Low	Moderate	Very Low	Very Low	Moderate	1.44794	0	0	0	0	0	0	0.135141	1.26695	0	0	Very High	Very Low	Very Low	Very Low	Very Low	Very Low	Very Low	Very Low	Very High	Very Low	Very Low	Very High	Very High	0
203275	GB108045020930	0.365642	0	0	0	0	0	0	0.052374	0.344937	0	0	Low	Very Low	Very Low	Very Low	Very Low	Very Low	Very Low	Very Low	Low	Very Low	Very Low	Low	1.20569	0	0	0	0	0	0	0.112531	1.05497	0	0	Very High	Very Low	Very Low	Very Low	Very Low	Very Low	Very Low	Very Low	Very High	Very Low	Very Low	Very High	Very High	0
203276	GB108045009080	0	0	0	0	0	0	0	0	0	0	0	Very Low	Very Low	Very Low	Very Low	Very Low	Very Low	Very Low	Very Low	Very Low	Very Low	Very Low	Very Low	NA	NA	NA	NA	NA	NA	NA	NA	NA	NA	NA	NA	NA	NA	NA	NA	NA	NA	NA	NA	NA	NA	NA	Very Low	0
203299	GB108046005200	0.681258	0	0	0	0	0	0	0.166314	0.651589	0	0	High	Very Low	Very Low	Very Low	Very Low	Very Low	Very Low	Very Low	High	Very Low	Very Low	High	2.13743	0	0	0	0	0	0	0.199493	1.87025	0	0	Very High	Very Low	Very Low	Very Low	Very Low	Very Low	Very Low	Very Low	Very High	Very Low	Very Low	Very High	Very High	0
203312	GB108050020020	0.691027	0	0	0	0	0	0	0.172973	0.6661	0	0	High	Very Low	Very Low	Very Low	Very Low	Very Low	Very Low	Very Low	High	Very Low	Very Low	High	3.54925	0	0	0	0	0	0	0.331264	3.1056	0	0	Very High	Very Low	Very Low	Very Low	Very Low	Very Low	Very Low	Low	Very High	Very Low	Very Low	Very High	Very High	0
203312	GB108050020040	1	0	0	0	0	0	0	1	1	0	0	Very High	Very Low	Very Low	Very Low	Very Low	Very Low	Very Low	Very High	Very High	Very Low	Very Low	Very High	3.54925	0	0	0	0	0	0	0.331264	3.1056	0	0	Very High	Very Low	Very Low	Very Low	Very Low	Very Low	Very Low	Low	Very High	Very Low	Very Low	Very High	Very High	0
203364	GB620806110002	0	0	0	0	0	0	0	0	0.513422	0	0	Very Low	Very Low	Very Low	Very Low	Very Low	Very Low	Very Low	Very Low	Moderate	Very Low	Very Low	Moderate	0	0	0	0	0	0	0	0	1.16593	0	0	Very Low	Very Low	Very Low	Very Low	Very Low	Very Low	Very Low	Very Low	Very High	Very Low	Very Low	Very High	Very High	3
203380	GB108050008270	0.072676	0	0	0	0	0	0	0.0402658	0.0850355	0	0	Very Low	Very Low	Very Low	Very Low	Very Low	Very Low	Very Low	Very Low	Very Low	Very Low	Very Low	Very Low	1.99736	0	0	0	0	0	0	0.186421	1.74769	0	0	Very High	Very Low	Very Low	Very Low	Very Low	Very Low	Very Low	Very Low	Very High	Very Low	Very Low	Very High	Very High	0
203388	GB108046008540	0.0580097	0	0	0	0	0	0	0	0.0495505	0	0	Very Low	Very Low	Very Low	Very Low	Very Low	Very Low	Very Low	Very Low	Very Low	Very Low	Very Low	Very Low	0.843838	0	0	0	0	0	0	0	0.738359	0	0	Very High	Very Low	Very Low	Very Low	Very Low	Very Low	Very Low	Very Low	High	Very Low	Very Low	Very High	Very High	0
203406	GB108046005210	0.433656	0	0	0	0	0	0	0.0724986	0.424987	0	0	Moderate	Very Low	Very Low	Very Low	Very Low	Very Low	Very Low	Very Low	Moderate	Very Low	Very Low	Moderate	1.4585	0	0	0	0	0	0	0.136127	1.27619	0	0	Very High	Very Low	Very Low	Very Low	Very Low	Very Low	Very Low	Very Low	Very High	Very Low	Very Low	Very High	Very High	0
203410	GB620806110002	0.0676255	0	0	0	0	0	0	0	0.0300521	0	0	Very Low	Very Low	Very Low	Very Low	Very Low	Very Low	Very Low	Very Low	Very Low	Very Low	Very Low	Very Low	0.716429	0	0	0	0	0	0	0	0.626876	0	0	High	Very Low	Very Low	Very Low	Very Low	Very Low	Very Low	Very Low	High	Very Low	Very Low	High	High	3
203413	GB620806110003	0.0553597	0	0	0	0	0	0	0.0988658	0.0641278	0	0	Very Low	Very Low	Very Low	Very Low	Very Low	Very Low	Very Low	Very Low	Very Low	Very Low	Very Low	Very Low	2.75857	0	0	0	0	0	0	0.257466	2.41375	0	0	Very High	Very Low	Very Low	Very Low	Very Low	Very Low	Very Low	Low	Very High	Very Low	Very Low	Very High	Very High	12
203442	GB108046004760	0.00912171	0	0	0	0	0	0	0	0.00799061	0	0	Very Low	Very Low	Very Low	Very Low	Very Low	Very Low	Very Low	Very Low	Very Low	Very Low	Very Low	Very Low	0.00920568	0	0	0	0	0	0	0	0.00805497	0	0	Very Low	Very Low	Very Low	Very Low	Very Low	Very Low	Very Low	Very Low	Very Low	Very Low	Very Low	Very Low	Very Low	0
203474	GB108045014840	0.00225784	0	0	0	0	0	0	0.000775266	0.00281177	0	0	Very Low	Very Low	Very Low	Very Low	Very Low	Very Low	Very Low	Very Low	Very Low	Very Low	Very Low	Very Low	0.0242747	0	0	0	0	0	0	0.00226564	0.0212404	0	0	Very Low	Very Low	Very Low	Very Low	Very Low	Very Low	Very Low	Very Low	Very Low	Very Low	Very Low	Very Low	Very Low	0
203478	GB108045009220	0.384571	0	0	0	0	0	0	0.0551082	0.353492	0	0	Low	Very Low	Very Low	Very Low	Very Low	Very Low	Very Low	Very Low	Low	Very Low	Very Low	Low	0.624882	0	0	0	0	0	0	0.0583223	0.546771	0	0	High	Very Low	Very Low	Very Low	Very Low	Very Low	Very Low	Very Low	Moderate	Very Low	Very Low	High	High	0
203562	GB108046005170	0.46172	0	0	0	0	0	0	0.213861	0.447473	0	0	Moderate	Very Low	Very Low	Very Low	Very Low	Very Low	Very Low	Low	Moderate	Very Low	Very Low	Moderate	3.32534	0	0	0	0	0	0	0.310365	2.90968	0	0	Very High	Very Low	Very Low	Very Low	Very Low	Very Low	Very Low	Low	Very High	Very Low	Very Low	Very High	Very High	0
203566	GB108046008540	0	0	0	0	0	0	0	0	0	0	0	Very Low	Very Low	Very Low	Very Low	Very Low	Very Low	Very Low	Very Low	Very Low	Very Low	Very Low	Very Low	NA	NA	NA	NA	NA	NA	NA	NA	NA	NA	NA	NA	NA	NA	NA	NA	NA	NA	NA	NA	NA	NA	NA	Very Low	0
203577	GB610807680003	0	0	0	0	0	0	0	0	0.000639245	0	0	Very Low	Very Low	Very Low	Very Low	Very Low	Very Low	Very Low	Very Low	Very Low	Very Low	Very Low	Very Low	0	0	0	0	0	0	0	0	0.0171339	0	0	Very Low	Very Low	Very Low	Very Low	Very Low	Very Low	Very Low	Very Low	Very Low	Very Low	Very Low	Very Low	Very Low	6
203600	GB108046008570	0	0	0	0	0	0	0	0	0	0	0	Very Low	Very Low	Very Low	Very Low	Very Low	Very Low	Very Low	Very Low	Very Low	Very Low	Very Low	Very Low	NA	NA	NA	NA	NA	NA	NA	NA	NA	NA	NA	NA	NA	NA	NA	NA	NA	NA	NA	NA	NA	NA	NA	Very Low	0
203625	GB510804605900	0	0	0	0	0	0	0	0	0	0	0	Very Low	Very Low	Very Low	Very Low	Very Low	Very Low	Very Low	Very Low	Very Low	Very Low	Very Low	Very Low	NA	NA	NA	NA	NA	NA	NA	NA	NA	NA	NA	NA	NA	NA	NA	NA	NA	NA	NA	NA	NA	NA	NA	Very Low	1
203662	GB108050014170	0.61893	0	0	0	0	0	0	0.131636	0.586976	0	0	High	Very Low	Very Low	Very Low	Very Low	Very Low	Very Low	Very Low	Moderate	Very Low	Very Low	High	1.62419	0	0	0	0	0	0	0.151591	1.42117	0	0	Very High	Very Low	Very Low	Very Low	Very Low	Very Low	Very Low	Very Low	Very High	Very Low	Very Low	Very High	Very High	0
203792	GB108050014260	0	0	0	0	0	0	0	0	0	0	0	Very Low	Very Low	Very Low	Very Low	Very Low	Very Low	Very Low	Very Low	Very Low	Very Low	Very Low	Very Low	0.665724	0	0	0	0	0	0	0.0621343	0.582509	0.0475517	0	High	Very Low	Very Low	Very Low	Very Low	Very Low	Very Low	Very Low	Moderate	Very Low	Very Low	High	High	0
203792	GB108050014660	0.399661	0	0	0	0	0	0	0.0584995	0.368092	0.0453932	0	Low	Very Low	Very Low	Very Low	Very Low	Very Low	Very Low	Very Low	Low	Very Low	Very Low	Low	0.665724	0	0	0	0	0	0	0.0621343	0.582509	0.0475517	0	High	Very Low	Very Low	Very Low	Very Low	Very Low	Very Low	Very Low	Moderate	Very Low	Very Low	High	High	0
203806	GB108045015030	0	0	0	0	0	0	0	0	0	0	0	Very Low	Very Low	Very Low	Very Low	Very Low	Very Low	Very Low	Very Low	Very Low	Very Low	Very Low	Very Low	NA	NA	NA	NA	NA	NA	NA	NA	NA	NA	NA	NA	NA	NA	NA	NA	NA	NA	NA	NA	NA	NA	NA	Very Low	0
203812	GB108046008440	1	0	0	0	0	0	0	1	1	0	0	Very High	Very Low	Very Low	Very Low	Very Low	Very Low	Very Low	Very High	Very High	Very Low	Very Low	Very High	3.23919	0	0	0	0	0	0	0.302324	2.83429	0	0	Very High	Very Low	Very Low	Very Low	Very Low	Very Low	Very Low	Low	Very High	Very Low	Very Low	Very High	Very High	0
203812	GB108046008470	0.655608	0	0	0	0	0	0	0.15087	0.624866	0	0	High	Very Low	Very Low	Very Low	Very Low	Very Low	Very Low	Very Low	High	Very Low	Very Low	High	3.23919	0	0	0	0	0	0	0.302324	2.83429	0	0	Very High	Very Low	Very Low	Very Low	Very Low	Very Low	Very Low	Low	Very High	Very Low	Very Low	Very High	Very High	0
203835	GB108050014210	0	0	0	0	0	0	0	0	0	0	0	Very Low	Very Low	Very Low	Very Low	Very Low	Very Low	Very Low	Very Low	Very Low	Very Low	Very Low	Very Low	NA	NA	NA	NA	NA	NA	NA	NA	NA	NA	NA	NA	NA	NA	NA	NA	NA	NA	NA	NA	NA	NA	NA	Very Low	0
203846	GB108045014910	0	0	0	0	0	0	0	0	0	0	0	Very Low	Very Low	Very Low	Very Low	Very Low	Very Low	Very Low	Very Low	Very Low	Very Low	Very Low	Very Low	NA	NA	NA	NA	NA	NA	NA	NA	NA	NA	NA	NA	NA	NA	NA	NA	NA	NA	NA	NA	NA	NA	NA	Very Low	0
203866	GB520804609000	0	0	0	0	0	0	0	0	0	0	0	Very Low	Very Low	Very Low	Very Low	Very Low	Very Low	Very Low	Very Low	Very Low	Very Low	Very Low	Very Low	NA	NA	NA	NA	NA	NA	NA	NA	NA	NA	NA	NA	NA	NA	NA	NA	NA	NA	NA	NA	NA	NA	NA	Very Low	0
203881	GB108050014520	0	0	0	0	0	0	0	0	0	0	0	Very Low	Very Low	Very Low	Very Low	Very Low	Very Low	Very Low	Very Low	Very Low	Very Low	Very Low	Very Low	NA	NA	NA	NA	NA	NA	NA	NA	NA	NA	NA	NA	NA	NA	NA	NA	NA	NA	NA	NA	NA	NA	NA	Very Low	0
203887	GB108046008350	0	0	0	0	0	0	0	0	0	0	0	Very Low	Very Low	Very Low	Very Low	Very Low	Very Low	Very Low	Very Low	Very Low	Very Low	Very Low	Very Low	NA	NA	NA	NA	NA	NA	NA	NA	NA	NA	NA	NA	NA	NA	NA	NA	NA	NA	NA	NA	NA	NA	NA	Very Low	0
203889	GB108046008600	0	0	0	0	0	0	0	0	0	0	0	Very Low	Very Low	Very Low	Very Low	Very Low	Very Low	Very Low	Very Low	Very Low	Very Low	Very Low	Very Low	NA	NA	NA	NA	NA	NA	NA	NA	NA	NA	NA	NA	NA	NA	NA	NA	NA	NA	NA	NA	NA	NA	NA	Very Low	0
203909	GB108050014470	0	0	0	0	0	0	0	0	0	0	0	Very Low	Very Low	Very Low	Very Low	Very Low	Very Low	Very Low	Very Low	Very Low	Very Low	Very Low	Very Low	NA	NA	NA	NA	NA	NA	NA	NA	NA	NA	NA	NA	NA	NA	NA	NA	NA	NA	NA	NA	NA	NA	NA	Very Low	0
203911	GB108046008390	0	0	0	0	0	0	0	0	0	0	0	Very Low	Very Low	Very Low	Very Low	Very Low	Very Low	Very Low	Very Low	Very Low	Very Low	Very Low	Very Low	NA	NA	NA	NA	NA	NA	NA	NA	NA	NA	NA	NA	NA	NA	NA	NA	NA	NA	NA	NA	NA	NA	NA	Very Low	0
204041	GB108050014380	0	0	0	0	0	0	0	0	0	0	0	Very Low	Very Low	Very Low	Very Low	Very Low	Very Low	Very Low	Very Low	Very Low	Very Low	Very Low	Very Low	NA	NA	NA	NA	NA	NA	NA	NA	NA	NA	NA	NA	NA	NA	NA	NA	NA	NA	NA	NA	NA	NA	NA	Very Low	0
2064(T)	GB104027062760	0	0	0	0	0	0	0	0	5.3e-05	0	0	Very Low	Very Low	Very Low	Very Low	Very Low	Very Low	Very Low	Very Low	Very Low	Very Low	Very Low	Very Low	0	0	0	0	0	0	0	0	0.0049473	0	0	Very Low	Very Low	Very Low	Very Low	Very Low	Very Low	Very Low	Very Low	Very Low	Very Low	Very Low	Very Low	Very Low	0
2081	GB104027057772	0.00653115	0	0	0	0	0	0	0	0.00519998	0	0	Very Low	Very Low	Very Low	Very Low	Very Low	Very Low	Very Low	Very Low	Very Low	Very Low	Very Low	Very Low	0.0333967	0	0	0	0	0	0	0	0.0333967	0	0	Very Low	Very Low	Very Low	Very Low	Very Low	Very Low	Very Low	Very Low	Very Low	Very Low	Very Low	Very Low	Very Low	0
210/0038	GB103021073221	0	0	0	0	0	0	0	0	0	0	0	Very Low	Very Low	Very Low	Very Low	Very Low	Very Low	Very Low	Very Low	Very Low	Very Low	Very Low	Very Low	NA	NA	NA	NA	NA	NA	NA	NA	NA	NA	NA	NA	NA	NA	NA	NA	NA	NA	NA	NA	NA	NA	NA	Very Low	0
210/0039	GB102021072990	0	0	0	0	0	0	0	0	0	0	0	Very Low	Very Low	Very Low	Very Low	Very Low	Very Low	Very Low	Very Low	Very Low	Very Low	Very Low	Very Low	NA	NA	NA	NA	NA	NA	NA	NA	NA	NA	NA	NA	NA	NA	NA	NA	NA	NA	NA	NA	NA	NA	NA	Very Low	0
210/0039	GB103022076693	0	0	0	0	0	0	0	0	0	0	0	Very Low	Very Low	Very Low	Very Low	Very Low	Very Low	Very Low	Very Low	Very Low	Very Low	Very Low	Very Low	NA	NA	NA	NA	NA	NA	NA	NA	NA	NA	NA	NA	NA	NA	NA	NA	NA	NA	NA	NA	NA	NA	NA	Very Low	0
210/0887	GB510202110000	0	0	0	0	0	0	0	0	0	0	0	Very Low	Very Low	Very Low	Very Low	Very Low	Very Low	Very Low	Very Low	Very Low	Very Low	Very Low	Very Low	NA	NA	NA	NA	NA	NA	NA	NA	NA	NA	NA	NA	NA	NA	NA	NA	NA	NA	NA	NA	NA	NA	NA	Very Low	0
210/0899	GB102021073050	0	0	0	0	0	0	0	0	0	0	0	Very Low	Very Low	Very Low	Very Low	Very Low	Very Low	Very Low	Very Low	Very Low	Very Low	Very Low	Very Low	NA	NA	NA	NA	NA	NA	NA	NA	NA	NA	NA	NA	NA	NA	NA	NA	NA	NA	NA	NA	NA	NA	NA	Very Low	0
210/1273	GB510202110000	0.314949	0	0	0	0	0	0	0	0.286874	0	0	Low	Very Low	Very Low	Very Low	Very Low	Very Low	Very Low	Very Low	Low	Very Low	Very Low	Low	1.06621	0	0	0	0	0	0	0	0.932932	0	0	Very High	Very Low	Very Low	Very Low	Very Low	Very Low	Very Low	Very Low	Very High	Very Low	Very Low	Very High	Very High	0
210/1273	GB650301440000	0.997752	0	0	0	0	0	0	0	0.998048	0	0	Very High	Very Low	Very Low	Very Low	Very Low	Very Low	Very Low	Very Low	Very High	Very Low	Very Low	Very High	1.06621	0	0	0	0	0	0	0	0.932932	0	0	Very High	Very Low	Very Low	Very Low	Very Low	Very Low	Very Low	Very Low	Very High	Very Low	Very Low	Very High	Very High	3
210/1275	GB102021072930	0.180986	0	0	0	0	0	0	0.020208	0.162028	0.015539	0	Very Low	Very Low	Very Low	Very Low	Very Low	Very Low	Very Low	Very Low	Very Low	Very Low	Very Low	Very Low	0.22098	0	0	0	0	0	0	0.0206248	0.193357	0.0157843	0	Low	Very Low	Very Low	Very Low	Very Low	Very Low	Very Low	Very Low	Very Low	Very Low	Very Low	Low	Low	0
210/1295	GB102021073041	0.638601	0	0	0	0	0	0	0	0.60725	0	0	High	Very Low	Very Low	Very Low	Very Low	Very Low	Very Low	Very Low	High	Very Low	Very Low	High	1.76703	0	0	0	0	0	0	0	1.54615	0	0	Very High	Very Low	Very Low	Very Low	Very Low	Very Low	Very Low	Very Low	Very High	Very Low	Very Low	Very High	Very High	0
210/1327	GB102021073050	0.00628239	0	0	0	0	0	0	0	0.00550141	0	0	Very Low	Very Low	Very Low	Very Low	Very Low	Very Low	Very Low	Very Low	Very Low	Very Low	Very Low	Very Low	0.0063221	0	0	0	0	0	0	0	0.00553184	0	0	Very Low	Very Low	Very Low	Very Low	Very Low	Very Low	Very Low	Very Low	Very Low	Very Low	Very Low	Very Low	Very Low	0
210/A/0849	GB103021073222	0.0907099	0	0	0	0	0	0	0.00922495	0.0802815	0	0	Very Low	Very Low	Very Low	Very Low	Very Low	Very Low	Very Low	Very Low	Very Low	Very Low	Very Low	Very Low	0.0997591	0	0	0	0	0	0	0.00931085	0.0872892	0	0	Very Low	Very Low	Very Low	Very Low	Very Low	Very Low	Very Low	Very Low	Very Low	Very Low	Very Low	Very Low	Very Low	0
210/A/0854	GB103021073221	0.296836	0	0	0	0	0	0	0	0.26974	0	0	Low	Very Low	Very Low	Very Low	Very Low	Very Low	Very Low	Very Low	Low	Very Low	Very Low	Low	0.422143	0	0	0	0	0	0	0	0.369375	0	0	Moderate	Very Low	Very Low	Very Low	Very Low	Very Low	Very Low	Very Low	Low	Very Low	Very Low	Moderate	Moderate	0
213	GB104027068420	0.138762	0	0	0	0	0	0	0	0.138762	0	0	Very Low	Very Low	Very Low	Very Low	Very Low	Very Low	Very Low	Very Low	Very Low	Very Low	Very Low	Very Low	0.16112	0	0	0	0	0	0	0	0.16112	0	0	Very Low	Very Low	Very Low	Very Low	Very Low	Very Low	Very Low	Very Low	Very Low	Very Low	Very Low	Very Low	Very Low	0
2137	GB530402609202	0	0	0	0	0	0	0	0	0.00692247	0	0	Very Low	Very Low	Very Low	Very Low	Very Low	Very Low	Very Low	Very Low	Very Low	Very Low	Very Low	Very Low	0	0	0	0	0	0	0	0	0.0622715	0	0	Very Low	Very Low	Very Low	Very Low	Very Low	Very Low	Very Low	Very Low	Very Low	Very Low	Very Low	Very Low	Very Low	0
2138	GB104027052280	0.0393427	0	0	0.121427	0	0	0	0.0184997	0.049351	0	0	Very Low	Very Low	Very Low	Very Low	Very Low	Very Low	Very Low	Very Low	Very Low	Very Low	Very Low	Very Low	0.13821	0	0	0.13821	0	0	0	0.13821	0.13821	0	0	Very Low	Very Low	Very Low	Very Low	Very Low	Very Low	Very Low	Very Low	Very Low	Very Low	Very Low	Very Low	Very Low	0
2160	GB104027057452	0.0062558	0	0	0	0	0	0	0.028976	0.0079885	0	0	Very Low	Very Low	Very Low	Very Low	Very Low	Very Low	Very Low	Very Low	Very Low	Very Low	Very Low	Very Low	0.189857	0	0	0	0	0	0	0.189857	0.189857	0	0	Very Low	Very Low	Very Low	Very Low	Very Low	Very Low	Very Low	Very Low	Very Low	Very Low	Very Low	Very Low	Very Low	0
2160	GB70410274	1	0	0	0	0	0	0	1	1	0	0	Very High	Very Low	Very Low	Very Low	Very Low	Very Low	Very Low	Very High	Very High	Very Low	Very Low	Very High	0.189857	0	0	0	0	0	0	0.189857	0.189857	0	0	Very Low	Very Low	Very Low	Very Low	Very Low	Very Low	Very Low	Very Low	Very Low	Very Low	Very Low	Very Low	Very High	0
2172	GB104027057470	0.0112319	0	0	0	0	0	0	0.28625	0.0199282	0	0	Very Low	Very Low	Very Low	Very Low	Very Low	Very Low	Very Low	Low	Very Low	Very Low	Very Low	Low	0.0751445	0	0	0	0	0	0	0.0751445	0.0751445	0	0	Very Low	Very Low	Very Low	Very Low	Very Low	Very Low	Very Low	Very Low	Very Low	Very Low	Very Low	Very Low	Low	0
2172	GB104027063173	0.0106955	0	0	0	0	0	0	0.0386002	0.0187404	0	0	Very Low	Very Low	Very Low	Very Low	Very Low	Very Low	Very Low	Very Low	Very Low	Very Low	Very Low	Very Low	0.0751445	0	0	0	0	0	0	0.0751445	0.0751445	0	0	Very Low	Very Low	Very Low	Very Low	Very Low	Very Low	Very Low	Very Low	Very Low	Very Low	Very Low	Very Low	Very Low	0
2188	GB104026067090	0.00234018	0	0	0	0	0	0	0.00234018	0.00234018	0	0	Very Low	Very Low	Very Low	Very Low	Very Low	Very Low	Very Low	Very Low	Very Low	Very Low	Very Low	Very Low	0.00234567	0	0	0	0	0	0	0.00234567	0.00234567	0	0	Very Low	Very Low	Very Low	Very Low	Very Low	Very Low	Very Low	Very Low	Very Low	Very Low	Very Low	Very Low	Very Low	0
2206	GB104027062980	0.00201219	0	0	0	0	0	0	0.00401453	0.00433542	0	0	Very Low	Very Low	Very Low	Very Low	Very Low	Very Low	Very Low	Very Low	Very Low	Very Low	Very Low	Very Low	0.0220809	0	0	0	0	0	0	0.0220809	0.0220809	0	0	Very Low	Very Low	Very Low	Very Low	Very Low	Very Low	Very Low	Very Low	Very Low	Very Low	Very Low	Very Low	Very Low	0
2207	GB104027062560	0.0214675	0	0	0	0	0	0	0.0217419	0.0218159	0	0	Very Low	Very Low	Very Low	Very Low	Very Low	Very Low	Very Low	Very Low	Very Low	Very Low	Very Low	Very Low	0.0227778	0	0	0	0	0	0	0.0227778	0.0227778	0	0	Very Low	Very Low	Very Low	Very Low	Very Low	Very Low	Very Low	Very Low	Very Low	Very Low	Very Low	Very Low	Very Low	0
221/0144	GB103022076360	0	0	0	0	0	0	0	0	0	0	0	Very Low	Very Low	Very Low	Very Low	Very Low	Very Low	Very Low	Very Low	Very Low	Very Low	Very Low	Very Low	NA	NA	NA	NA	NA	NA	NA	NA	NA	NA	NA	NA	NA	NA	NA	NA	NA	NA	NA	NA	NA	NA	NA	Very Low	0
221/0912	GB650301500001	0	0	0	0	0	0	0	0	0	0	0	Very Low	Very Low	Very Low	Very Low	Very Low	Very Low	Very Low	Very Low	Very Low	Very Low	Very Low	Very Low	NA	NA	NA	NA	NA	NA	NA	NA	NA	NA	NA	NA	NA	NA	NA	NA	NA	NA	NA	NA	NA	NA	NA	Very Low	4
221/0968	GB103022076490	0	0	0	0	0	0	0	0	0	0	0	Very Low	Very Low	Very Low	Very Low	Very Low	Very Low	Very Low	Very Low	Very Low	Very Low	Very Low	Very Low	NA	NA	NA	NA	NA	NA	NA	NA	NA	NA	NA	NA	NA	NA	NA	NA	NA	NA	NA	NA	NA	NA	NA	Very Low	0
221/1016	GB650301440000	0.00135791	0	0	0	0	0	0	0	0.00135831	0	0	Very Low	Very Low	Very Low	Very Low	Very Low	Very Low	Very Low	Very Low	Very Low	Very Low	Very Low	Very Low	0.0612539	0	0	0	0	0	0	0	0.0535972	0	0	Very Low	Very Low	Very Low	Very Low	Very Low	Very Low	Very Low	Very Low	Very Low	Very Low	Very Low	Very Low	Very Low	3
221/1034	GB103022076430	0	0	0	0	0	0	0	0	0	0	0	Very Low	Very Low	Very Low	Very Low	Very Low	Very Low	Very Low	Very Low	Very Low	Very Low	Very Low	Very Low	5.51944	0	0	0	0	0	0	0.103699	0.855513	0.38887	0	Very High	Very Low	Very Low	Very Low	Very Low	Very Low	Very Low	Very Low	Very High	Low	Very Low	Very High	Very High	0
221/1034	GB103022076460	0.846613	0	0	0	0	0	0	0.0939555	0.461065	0.27999	0	Very High	Very Low	Very Low	Very Low	Very Low	Very Low	Very Low	Very Low	Moderate	Low	Very Low	Very High	5.51944	0	0	0	0	0	0	0.103699	0.855513	0.38887	0	Very High	Very Low	Very Low	Very Low	Very Low	Very Low	Very Low	Very Low	Very High	Low	Very Low	Very High	Very High	0
221/1035	GB650301500001	0	0	0	0	0	0	0	0	0	0	0	Very Low	Very Low	Very Low	Very Low	Very Low	Very Low	Very Low	Very Low	Very Low	Very Low	Very Low	Very Low	NA	NA	NA	NA	NA	NA	NA	NA	NA	NA	NA	NA	NA	NA	NA	NA	NA	NA	NA	NA	NA	NA	NA	Very Low	4
221/1056	GB103022077070	0	0	0	0	0	0	0	0	0	0	0	Very Low	Very Low	Very Low	Very Low	Very Low	Very Low	Very Low	Very Low	Very Low	Very Low	Very Low	Very Low	NA	NA	NA	NA	NA	NA	NA	NA	NA	NA	NA	NA	NA	NA	NA	NA	NA	NA	NA	NA	NA	NA	NA	Very Low	0
221/1076	GB620301100000	0.0874971	0	0	0	0	0	0	0	0.0774066	0	0	Very Low	Very Low	Very Low	Very Low	Very Low	Very Low	Very Low	Very Low	Very Low	Very Low	Very Low	Very Low	0.096336	0	0	0	0	0	0	0	0.084294	0	0	Very Low	Very Low	Very Low	Very Low	Very Low	Very Low	Very Low	Very Low	Very Low	Very Low	Very Low	Very Low	Very Low	2
221/1076	GB650301440000	0.000890246	0	0	0	0	0	0	0	0.000593673	0	0	Very Low	Very Low	Very Low	Very Low	Very Low	Very Low	Very Low	Very Low	Very Low	Very Low	Very Low	Very Low	0.096336	0	0	0	0	0	0	0	0.084294	0	0	Very Low	Very Low	Very Low	Very Low	Very Low	Very Low	Very Low	Very Low	Very Low	Very Low	Very Low	Very Low	Very Low	3
221/A/0845	GB103022076370	0.0950769	0	0	0	0	0	0	0.00971096	0.0841929	0	0	Very Low	Very Low	Very Low	Very Low	Very Low	Very Low	Very Low	Very Low	Very Low	Very Low	Very Low	Very Low	0.7379	0	0	0	0	0	0	0.0688706	0.645662	0	0	High	Very Low	Very Low	Very Low	Very Low	Very Low	Very Low	Very Low	High	Very Low	Very Low	High	High	0
221/A/0845	GB103022076400	1	0	0	0	0	0	0	1	1	0	0	Very High	Very Low	Very Low	Very Low	Very Low	Very Low	Very Low	Very High	Very High	Very Low	Very Low	Very High	0.7379	0	0	0	0	0	0	0.0688706	0.645662	0	0	High	Very Low	Very Low	Very Low	Very Low	Very Low	Very Low	Very Low	High	Very Low	Very Low	High	Very High	0
2216	GB104027068940	0	0	0	0	0	0	0	0	0	0	0	Very Low	Very Low	Very Low	Very Low	Very Low	Very Low	Very Low	Very Low	Very Low	Very Low	Very Low	Very Low	NA	NA	NA	NA	NA	NA	NA	NA	NA	NA	NA	NA	NA	NA	NA	NA	NA	NA	NA	NA	NA	NA	NA	Very Low	0
222/0844	GB103022076350	0.0153206	0	0	0	0	0	0	0	0.00771945	0	0	Very Low	Very Low	Very Low	Very Low	Very Low	Very Low	Very Low	Very Low	Very Low	Very Low	Very Low	Very Low	0.0487889	0	0	0	0	0	0	0	0.0426903	0	0	Very Low	Very Low	Very Low	Very Low	Very Low	Very Low	Very Low	Very Low	Very Low	Very Low	Very Low	Very Low	Very Low	0
222/0844	GB510302203300	0.0234125	0	0	0	0	0	0	0	0.0205461	0	0	Very Low	Very Low	Very Low	Very Low	Very Low	Very Low	Very Low	Very Low	Very Low	Very Low	Very Low	Very Low	0.0487889	0	0	0	0	0	0	0	0.0426903	0	0	Very Low	Very Low	Very Low	Very Low	Very Low	Very Low	Very Low	Very Low	Very Low	Very Low	Very Low	Very Low	Very Low	0
222/0862	GB103022076350	0.0468949	0	0	0	0	0	0	0.0476245	0.0472569	0	0	Very Low	Very Low	Very Low	Very Low	Very Low	Very Low	Very Low	Very Low	Very Low	Very Low	Very Low	Very Low	0.050006	0	0	0	0	0	0	0.050006	0.050006	0	0	Very Low	Very Low	Very Low	Very Low	Very Low	Very Low	Very Low	Very Low	Very Low	Very Low	Very Low	Very Low	Very Low	0
222/0864	GB103022076310	0.416412	0	0	0	0	0	0	0	0.352322	0	0	Moderate	Very Low	Very Low	Very Low	Very Low	Very Low	Very Low	Very Low	Low	Very Low	Very Low	Moderate	1.28155	0	0	0	0	0	0	0	1.12136	0	0	Very High	Very Low	Very Low	Very Low	Very Low	Very Low	Very Low	Very Low	Very High	Very Low	Very Low	Very High	Very High	0
2225	GB104027062810	0.0573252	0	0	0	0	0	0	0.0573252	0.0573252	0	0	Very Low	Very Low	Very Low	Very Low	Very Low	Very Low	Very Low	Very Low	Very Low	Very Low	Very Low	Very Low	0.0689135	0	0	0	0	0	0	0.0689135	0.0689135	0	0	Very Low	Very Low	Very Low	Very Low	Very Low	Very Low	Very Low	Very Low	Very Low	Very Low	Very Low	Very Low	Very Low	0
2225	GB104027063032	0.000140821	0	0	0	0	0	0	0.000959873	0.000138798	0	0	Very Low	Very Low	Very Low	Very Low	Very Low	Very Low	Very Low	Very Low	Very Low	Very Low	Very Low	Very Low	0.0689135	0	0	0	0	0	0	0.0689135	0.0689135	0	0	Very Low	Very Low	Very Low	Very Low	Very Low	Very Low	Very Low	Very Low	Very Low	Very Low	Very Low	Very Low	Very Low	0
223/0419	GB103022076770	0	0	0	0	0	0	0	0	0	0	0	Very Low	Very Low	Very Low	Very Low	Very Low	Very Low	Very Low	Very Low	Very Low	Very Low	Very Low	Very Low	NA	NA	NA	NA	NA	NA	NA	NA	NA	NA	NA	NA	NA	NA	NA	NA	NA	NA	NA	NA	NA	NA	NA	Very Low	0
223/0633	GB103022076550	0.542791	0	0	0	0	0	0	0.0997509	0.509512	0	0	Moderate	Very Low	Very Low	Very Low	Very Low	Very Low	Very Low	Very Low	Moderate	Very Low	Very Low	Moderate	1.18718	0	0	0	0	0	0	0.110804	1.03878	0	0	Very High	Very Low	Very Low	Very Low	Very Low	Very Low	Very Low	Very Low	Very High	Very Low	Very Low	Very High	Very High	0
223/0820	GB103022076692	0.0255417	0	0	0	0	0	0	0	0.0255417	0	0	Very Low	Very Low	Very Low	Very Low	Very Low	Very Low	Very Low	Very Low	Very Low	Very Low	Very Low	Very Low	0.0262112	0	0	0	0	0	0	0	0.0262112	0	0	Very Low	Very Low	Very Low	Very Low	Very Low	Very Low	Very Low	Very Low	Very Low	Very Low	Very Low	Very Low	Very Low	0
223/0832	GB103022076710	0	0	0	0	0	0	0	0	0	0	0	Very Low	Very Low	Very Low	Very Low	Very Low	Very Low	Very Low	Very Low	Very Low	Very Low	Very Low	Very Low	NA	NA	NA	NA	NA	NA	NA	NA	NA	NA	NA	NA	NA	NA	NA	NA	NA	NA	NA	NA	NA	NA	NA	Very Low	0
223/0931	GB510302203000	1	0	0	0	0	0	0	0	1	0	0	Very High	Very Low	Very Low	Very Low	Very Low	Very Low	Very Low	Very Low	Very High	Very Low	Very Low	Very High	0.962085	0	0	0	0	0	0	0	0.841825	0	0	Very High	Very Low	Very Low	Very Low	Very Low	Very Low	Very Low	Very Low	Very High	Very Low	Very Low	Very High	Very High	0
223/0931	GB650301500001	0.361579	0	0	0	0	0	0	0	0.310528	0	0	Low	Very Low	Very Low	Very Low	Very Low	Very Low	Very Low	Very Low	Low	Very Low	Very Low	Low	0.962085	0	0	0	0	0	0	0	0.841825	0	0	Very High	Very Low	Very Low	Very Low	Very Low	Very Low	Very Low	Very Low	Very High	Very Low	Very Low	Very High	Very High	4
223/0943	GB103022076601	0.0548436	0	0	0	0	0	0	0.0548436	0.0548436	0	0	Very Low	Very Low	Very Low	Very Low	Very Low	Very Low	Very Low	Very Low	Very Low	Very Low	Very Low	Very Low	0.0580259	0	0	0	0	0	0	0.0580259	0.0580259	0	0	Very Low	Very Low	Very Low	Very Low	Very Low	Very Low	Very Low	Very Low	Very Low	Very Low	Very Low	Very Low	Very Low	0
223/0991	GB103022076720	0.101737	0	0	0	0	0	0	0.101737	0.101737	0	0	Very Low	Very Low	Very Low	Very Low	Very Low	Very Low	Very Low	Very Low	Very Low	Very Low	Very Low	Very Low	0.11326	0	0	0	0	0	0	0.11326	0.11326	0	0	Very Low	Very Low	Very Low	Very Low	Very Low	Very Low	Very Low	Very Low	Very Low	Very Low	Very Low	Very Low	Very Low	0
223/0993	GB103022076660	1	0	0	0	0	0	0	1	1	0	0	Very High	Very Low	Very Low	Very Low	Very Low	Very Low	Very Low	Very High	Very High	Very Low	Very Low	Very High	3.11464	0	0	0	0	0	0	0.2907	2.72531	0	0	Very High	Very Low	Very Low	Very Low	Very Low	Very Low	Very Low	Low	Very High	Very Low	Very Low	Very High	Very High	0
223/0993	GB103022076693	0.713337	0	0	0	0	0	0	0.18856	0.685278	0	0	High	Very Low	Very Low	Very Low	Very Low	Very Low	Very Low	Very Low	High	Very Low	Very Low	High	3.11464	0	0	0	0	0	0	0.2907	2.72531	0	0	Very High	Very Low	Very Low	Very Low	Very Low	Very Low	Very Low	Low	Very High	Very Low	Very Low	Very High	Very High	0
223/0995	GB103022076692	0	0	0	0	0	0	0	0	0	0	0	Very Low	Very Low	Very Low	Very Low	Very Low	Very Low	Very Low	Very Low	Very Low	Very Low	Very Low	Very Low	NA	NA	NA	NA	NA	NA	NA	NA	NA	NA	NA	NA	NA	NA	NA	NA	NA	NA	NA	NA	NA	NA	NA	Very Low	0
223/1000	GB103022076750	0	0	0	0	0	0	0	0	0	0	0	Very Low	Very Low	Very Low	Very Low	Very Low	Very Low	Very Low	Very Low	Very Low	Very Low	Very Low	Very Low	NA	NA	NA	NA	NA	NA	NA	NA	NA	NA	NA	NA	NA	NA	NA	NA	NA	NA	NA	NA	NA	NA	NA	Very Low	0
224/0991	GB103022076521	0	0	0	0	0	0	0	0	0	0	0	Very Low	Very Low	Very Low	Very Low	Very Low	Very Low	Very Low	Very Low	Very Low	Very Low	Very Low	Very Low	NA	NA	NA	NA	NA	NA	NA	NA	NA	NA	NA	NA	NA	NA	NA	NA	NA	NA	NA	NA	NA	NA	NA	Very Low	0
224/0991	GB650301500001	0	0	0	0	0	0	0	0	0	0	0	Very Low	Very Low	Very Low	Very Low	Very Low	Very Low	Very Low	Very Low	Very Low	Very Low	Very Low	Very Low	NA	NA	NA	NA	NA	NA	NA	NA	NA	NA	NA	NA	NA	NA	NA	NA	NA	NA	NA	NA	NA	NA	NA	Very Low	4
224/0992	GB650301600000	1	0	0	0	0	0	0	0	1	0	0	Very High	Very Low	Very Low	Very Low	Very Low	Very Low	Very Low	Very Low	Very High	Very Low	Very Low	Very High	0.742595	0	0	0	0	0	0	0	0.64977	0	0	High	Very Low	Very Low	Very Low	Very Low	Very Low	Very Low	Very Low	High	Very Low	Very Low	High	Very High	0
224/0993	GB103022076820	0.889103	0	0	0	0	0	0	0	0.843167	0	0	Very High	Very Low	Very Low	Very Low	Very Low	Very Low	Very Low	Very Low	Very High	Very Low	Very Low	Very High	0.699324	0	0	0	0	0	0	0	0.611908	0	0	High	Very Low	Very Low	Very Low	Very Low	Very Low	Very Low	Very Low	High	Very Low	Very Low	High	Very High	0
224/0993	GB650301500001	0.0505646	0	0	0	0	0	0	0	0.0651382	0	0	Very Low	Very Low	Very Low	Very Low	Very Low	Very Low	Very Low	Very Low	Very Low	Very Low	Very Low	Very Low	0.699324	0	0	0	0	0	0	0	0.611908	0	0	High	Very Low	Very Low	Very Low	Very Low	Very Low	Very Low	Very Low	High	Very Low	Very Low	High	High	4
224/0993	GB650301600000	0	0	0	0	0	0	0	0	0	0	0	Very Low	Very Low	Very Low	Very Low	Very Low	Very Low	Very Low	Very Low	Very Low	Very Low	Very Low	Very Low	0.699324	0	0	0	0	0	0	0	0.611908	0	0	High	Very Low	Very Low	Very Low	Very Low	Very Low	Very Low	Very Low	High	Very Low	Very Low	High	High	0
224/A/0886	GB103022076820	0.0189441	0	0	0	0	0	0	0	0.0239537	0	0	Very Low	Very Low	Very Low	Very Low	Very Low	Very Low	Very Low	Very Low	Very Low	Very Low	Very Low	Very Low	0.206019	0	0	0	0	0	0	0	0.180267	0	0	Low	Very Low	Very Low	Very Low	Very Low	Very Low	Very Low	Very Low	Very Low	Very Low	Very Low	Low	Low	0
2246	GB104027063180	0.0556928	0	0	0	0	0	0	0.0556928	0.0556928	0	0	Very Low	Very Low	Very Low	Very Low	Very Low	Very Low	Very Low	Very Low	Very Low	Very Low	Very Low	Very Low	0.0766522	0	0	0	0	0	0	0.0766522	0.0766522	0	0	Very Low	Very Low	Very Low	Very Low	Very Low	Very Low	Very Low	Very Low	Very Low	Very Low	Very Low	Very Low	Very Low	0
2246	GB104027063230	0.00772198	0	0	0	0	0	0	0.0331624	0.0123879	0	0	Very Low	Very Low	Very Low	Very Low	Very Low	Very Low	Very Low	Very Low	Very Low	Very Low	Very Low	Very Low	0.0766522	0	0	0	0	0	0	0.0766522	0.0766522	0	0	Very Low	Very Low	Very Low	Very Low	Very Low	Very Low	Very Low	Very Low	Very Low	Very Low	Very Low	Very Low	Very Low	0
225/0351	GB103022077030	0	0	0	0	0	0	0	0	0	0	0	Very Low	Very Low	Very Low	Very Low	Very Low	Very Low	Very Low	Very Low	Very Low	Very Low	Very Low	Very Low	NA	NA	NA	NA	NA	NA	NA	NA	NA	NA	NA	NA	NA	NA	NA	NA	NA	NA	NA	NA	NA	NA	NA	Very Low	0
225/1031	GB103022077062	0.742566	0	0	0	0	0	0	0	0.742566	0	0	High	Very Low	Very Low	Very Low	Very Low	Very Low	Very Low	Very Low	High	Very Low	Very Low	High	0.315585	0	0	0	0	0	0	0	0.276137	0	0	Low	Very Low	Very Low	Very Low	Very Low	Very Low	Very Low	Very Low	Low	Very Low	Very Low	Low	High	0
225/1031	GB103025072450	0.0554647	0	0	0	0	0	0	0	0.0686222	0	0	Very Low	Very Low	Very Low	Very Low	Very Low	Very Low	Very Low	Very Low	Very Low	Very Low	Very Low	Very Low	0.315585	0	0	0	0	0	0	0	0.276137	0	0	Low	Very Low	Very Low	Very Low	Very Low	Very Low	Very Low	Very Low	Low	Very Low	Very Low	Low	Low	0
225/1031	GB510302210100	0	0	0	0	0	0	0	0	0	0	0	Very Low	Very Low	Very Low	Very Low	Very Low	Very Low	Very Low	Very Low	Very Low	Very Low	Very Low	Very Low	0.315585	0	0	0	0	0	0	0	0.276137	0	0	Low	Very Low	Very Low	Very Low	Very Low	Very Low	Very Low	Very Low	Low	Very Low	Very Low	Low	Low	0
225/1031	GB650301500002	0.00991032	0	0	0	0	0	0	0	0.0131949	0	0	Very Low	Very Low	Very Low	Very Low	Very Low	Very Low	Very Low	Very Low	Very Low	Very Low	Very Low	Very Low	0.315585	0	0	0	0	0	0	0	0.276137	0	0	Low	Very Low	Very Low	Very Low	Very Low	Very Low	Very Low	Very Low	Low	Very Low	Very Low	Low	Low	16
225/1036	GB103022077061	0.300026	0	0	0	0	0	0	0.0384661	0.272752	0	0	Low	Very Low	Very Low	Very Low	Very Low	Very Low	Very Low	Very Low	Low	Very Low	Very Low	Low	0.428625	0	0	0	0	0	0	0.040005	0.375047	0	0	Moderate	Very Low	Very Low	Very Low	Very Low	Very Low	Very Low	Very Low	Low	Very Low	Very Low	Moderate	Moderate	0
225/1079	GB103022077030	0.122851	0	0	0	0	0	0	0.0129033	0.109171	0	0	Very Low	Very Low	Very Low	Very Low	Very Low	Very Low	Very Low	Very Low	Very Low	Very Low	Very Low	Very Low	0.140057	0	0	0	0	0	0	0.013072	0.12255	0	0	Very Low	Very Low	Very Low	Very Low	Very Low	Very Low	Very Low	Very Low	Very Low	Very Low	Very Low	Very Low	Very Low	0
225/A/0870	GB103022076990	0.635201	0	0	0	0	0	0	0	0.603738	0	0	High	Very Low	Very Low	Very Low	Very Low	Very Low	Very Low	Very Low	High	Very Low	Very Low	High	1.74123	0	0	0	0	0	0	0	1.52358	0	0	Very High	Very Low	Very Low	Very Low	Very Low	Very Low	Very Low	Very Low	Very High	Very Low	Very Low	Very High	Very High	0
2251	GB104027062870	0.117983	0	0	0	0	0	0	0.114226	0.123343	0.135855	0	Very Low	Very Low	Very Low	Very Low	Very Low	Very Low	Very Low	Very Low	Very Low	Very Low	Very Low	Very Low	0.157213	0	0	0	0	0	0	0.157213	0.157213	0.157213	0	Very Low	Very Low	Very Low	Very Low	Very Low	Very Low	Very Low	Very Low	Very Low	Very Low	Very Low	Very Low	Very Low	0
2255	GB104027057600	1	0	0	0	0	0	0	1	1	0	0	Very High	Very Low	Very Low	Very Low	Very Low	Very Low	Very Low	Very High	Very High	Very Low	Very Low	Very High	3.10694	0	0	0	0	0	0	0.289981	2.71857	0	0	Very High	Very Low	Very Low	Very Low	Very Low	Very Low	Very Low	Low	Very High	Very Low	Very Low	Very High	Very High	0
2255	GB104027057610	1	0	0	0	0	0	0	1	1	0	0	Very High	Very Low	Very Low	Very Low	Very Low	Very Low	Very Low	Very High	Very High	Very Low	Very Low	Very High	3.10694	0	0	0	0	0	0	0.289981	2.71857	0	0	Very High	Very Low	Very Low	Very Low	Very Low	Very Low	Very Low	Low	Very High	Very Low	Very Low	Very High	Very High	0
2255	GB104027063034	0.00418978	0	0	0	0	0	0	0.000328392	0.0071907	0	0	Very Low	Very Low	Very Low	Very Low	Very Low	Very Low	Very Low	Very Low	Very Low	Very Low	Very Low	Very Low	3.10694	0	0	0	0	0	0	0.289981	2.71857	0	0	Very High	Very Low	Very Low	Very Low	Very Low	Very Low	Very Low	Low	Very High	Very Low	Very Low	Very High	Very High	0
2255	GB104027063301	0.393542	0	0	0	0	0	0	0.057107	0.362165	0	0	Low	Very Low	Very Low	Very Low	Very Low	Very Low	Very Low	Very Low	Low	Very Low	Very Low	Low	3.10694	0	0	0	0	0	0	0.289981	2.71857	0	0	Very High	Very Low	Very Low	Very Low	Very Low	Very Low	Very Low	Low	Very High	Very Low	Very Low	Very High	Very High	0
226/0927	GB103022076940	0.481657	0	0	0	0	0	0	0	0.448449	0	0	Moderate	Very Low	Very Low	Very Low	Very Low	Very Low	Very Low	Very Low	Moderate	Very Low	Very Low	Moderate	0.929223	0	0	0	0	0	0	0	0.81307	0	0	Very High	Very Low	Very Low	Very Low	Very Low	Very Low	Very Low	Very Low	Very High	Very Low	Very Low	Very High	Very High	0
[truncated: 3,351 more rows]
[truncated: 23 more columns]
